# Supplementary material for: A genotyping array for the globally invasive vector mosquito, Aedes albopictus
Source: Parasit Vectors. 2024 Mar 4;17:106. doi: 10.1186/s13071-024-06158-z (PMC10910840; doi:10.1186/s13071-024-06158-z)
Supplement: Supplementary file 18 — Additional file 18. Microsoft Excel file with probe sequences. [file 13071_2024_6158_MOESM18_ESM.xlsx]

## Sheet: Probe sequences
ReporterKey	Affx ID	Name	Sequence	SNPType	ProbeCount	Tile	Replicates	DesignNumber	Rank	Strand	SetBack	taxonomy_key	organism	cust_id	cust_chr	cust_pos	cust_ref	cust_alt	importance	pconvert	recommendation	Error
536823060	Affx-1249419468	AX-583388258	CCACCCAGTTGAAATTGTATCGGAACGGTGCATTA[C/T]TCATTTTAACGCTTTTTATCACAGATGCACATAAA	Y	2	1	2	1	10118	r		218	mosquito (Aedes albopictus)	chr1.144_5714162	chr1.144	5714162	T	C	standard	0.882	recommended
535746209	Affx-1248904337	AX-582323173	CCAAAGGATATTTGGTCAGTACCAATAGTAAAAGT[A/T]TCGTCTGAAGTAAATGAAACCTCTTCAGTTAAACA	W	4	1	2	1	10122	f		218	mosquito (Aedes albopictus)	chr3.70_2807204	chr3.70	2807204	T	A	standard	0.878	recommended
537507869	Affx-1249761675	AX-584070262	CAAAATGTTGAAAAATAATCATTTTCTGAAATTTT[C/T]TATACCGATTTCACTTACGACAAAACGTATGTTTG	Y	2	1	2	1	10124	r		218	mosquito (Aedes albopictus)	chr1.85_22130239	chr1.85	22130239	C	T	standard	0.876	recommended
533540163	Affx-1250822361	AX-580158081	CCTTCTGTGGACTGGACGAACAAGATGTGGGTTAG[A/T]ATTGTACATTTTGTCCTTAGACTCCATACATGTTT	W	4	1	2	1	10126	r		218	mosquito (Aedes albopictus)	chr2.87_30095490	chr2.87	30095490	T	A	standard	0.874	recommended
536958410	Affx-1249488406	AX-583523242	ATAAGTTATGGGTTTAGACAAATACACGAAATGAG[A/G]ATAACCAACCATAATAATTTCCAGATGCAAGAAGA	R	2	1	2	1	10128	f		218	mosquito (Aedes albopictus)	chr1.152_5192418	chr1.152	5192418	G	A	standard	0.872	recommended
537661563	Affx-1249840192	AX-584223503	GCATGATTTGTATATCGGGCAGTTACCTTTGTAAG[A/T]AAGAGCAGAGTGAAAGCGCATTCGTTCTGCCATAG	W	4	1	2	1	10130	f		218	mosquito (Aedes albopictus)	chr1.91_1315178	chr1.91	1315178	A	T	standard	0.87	recommended
538863460	Affx-1250392823	AX-585416723	TTTTTGTTCTAAATCTGTAAAACTTATAGGCATTT[C/T]CATTTTTCGACCGCTCGTTAATATTATCGACAAGC	Y	2	1	2	1	10132	r		218	mosquito (Aedes albopictus)	chr2.196_6501458	chr2.196	6501458	C	T	standard	0.868	recommended
535809469	Affx-1248925925	AX-582382081	TAATAAAGTCGTTTATAATAAACAATATTTGAGAG[A/T]TTCATTATCGTGATCCTTATTTGTTGAATTTTAAA	W	4	1	2	1	10134	r		218	mosquito (Aedes albopictus)	chr3.74_699657	chr3.74	699657	A	T	standard	0.866	recommended
535536217	Affx-1248833669	AX-582116728	GGAAAATTTAGTTTGCGTCAAATTAAATTTCATTT[C/T]GATTCTATAAAATTGTGTTCCAATACAAAAAATCC	Y	2	1	2	1	10136	r		218	mosquito (Aedes albopictus)	chr3.66_250060	chr3.66	250060	C	T	standard	0.864	recommended
534899637	Affx-1251325633	AX-581487267	AGTGTTTGTGGGTCCAATTTTAGTACAAAGTATGA[A/G]TAATTAATGTTCGATTTTAATCATTCTCGCATAAC	R	2	1	2	1	10136	f		218	mosquito (Aedes albopictus)	chr3.180_10532878	chr3.180	10532878	A	G	standard	0.864	recommended
533774220	Affx-1250921693	AX-580389332	GAAGTTATCGTGACACACGTATAATTTAGGATGTA[A/T]ACTCAATAACAGTTTGGATGACCTAGGATATCCAG	W	4	1	2	1	10136	f		218	mosquito (Aedes albopictus)	chr3.108_888516	chr3.108	888516	A	T	standard	0.864	recommended
537957445	Affx-1250001749	AX-584518433	AGCGATACTCTCAAAAGAGACGATAGGAAAGAAAC[A/G]AAATGTTTGCTTTGAACTTTTGGACATCTCTTTAT	R	2	1	2	1	10138	f		218	mosquito (Aedes albopictus)	chr2.126_874611	chr2.126	874611	G	A	standard	0.862	recommended
533669243	Affx-1250878810	AX-580286250	GGATGAGTTTTCTGGTTGACTTCCTAAGGAATAAA[A/G]TAATGAAATATTTTCCAAAGGGTTCTTCAAAACTT	R	2	1	2	1	10138	f		218	mosquito (Aedes albopictus)	chr2.97_11554262	chr2.97	11554262	G	A	standard	0.862	recommended
532984416	Affx-1250544816	AX-579602711	TCGGCGATGTTGGGGCGGGTGCACTCGGAGACTGG[A/T]TTGGAATTGATGGTATGCAAATAGTTGCATGTTTT	W	4	1	2	1	10140	r		218	mosquito (Aedes albopictus)	chr2.38_3276321	chr2.38	3276321	T	A	standard	0.86	recommended
536616745	Affx-1249317450	AX-583182527	GATGATTTTACCTTATGACCTCAGAATCTTCTCAA[A/T]TCCGTCCGTCGTGGAATTGTTCCTTAAGTATAGGG	W	4	1	2	1	10140	f		218	mosquito (Aedes albopictus)	chr1.119_127545	chr1.119	127545	T	A	standard	0.86	recommended
536407559	Affx-1249211684	AX-582974016	TTGGTTGAAATACGTCATTTCCTACTTTCTCTGTA[C/G]ATTTCGACTTCTCAGTTACAATACCATGATATAAC	S	4	1	2	1	10140	r		218	mosquito (Aedes albopictus)	chr3.93_410107	chr3.93	410107	G	C	standard	0.86	recommended
536630042	Affx-1249322964	AX-583195794	ATAAATTTTCTGATTAGTGGTCAAAATGGCTTCGC[A/C]TATGCCAATACGTTTACACTGTTCACATATCCACA	M	2	1	2	1	10140	r		218	mosquito (Aedes albopictus)	chr1.121_982187	chr1.121	982187	A	C	standard	0.86	recommended
535788373	Affx-1248917466	AX-582361379	ATTTGGAAACGTAAGATCACTAATGATACTGATAC[A/C]CCAAGTGAAAAAAATGCTTGAAAAAATGAAGTAAA	M	2	1	2	1	10142	f		218	mosquito (Aedes albopictus)	chr3.73_93639	chr3.73	93639	C	A	standard	0.858	recommended
538580561	Affx-1250109875	AX-585134691	AACGGGATGTTGTACCGGGATCCGGGTTCGTTCGA[A/G]ATTTGCAGATTGCTACGCAGTTCCGAGAGGAACGT	R	2	1	2	1	10142	r		218	mosquito (Aedes albopictus)	chr2.155_15535223	chr2.155	15535223	G	A	standard	0.858	recommended
538160685	Affx-1250205049	AX-584720859	ACAATAGAATAGGAATGCAAAATTTGATCATAATG[A/T]AAGTTTGAAAATATTTTAAATGTTGACAAGATAAA	W	4	1	2	1	10144	f		218	mosquito (Aedes albopictus)	chr2.175_9123715	chr2.175	9123715	T	A	standard	0.856	recommended
532995327	Affx-1250550254	AX-579613621	CTTTGGCGGCAAACTTAAAACGAACTGTTATATAG[A/G]ATTTCCACAATCTGTGTCGTCTATCAATATTTACC	R	2	1	2	1	10144	r		218	mosquito (Aedes albopictus)	chr2.40_845170	chr2.40	845170	G	A	standard	0.856	recommended
536184102	Affx-1249100680	AX-582751171	ATCACACATGCTTGAATATCATCTTACTTCAAACT[A/G]AAATGCATCAACTTCCTGGCGAAACCTGGTCCGTT	R	2	1	2	1	10146	f		218	mosquito (Aedes albopictus)	chr3.75_14593949	chr3.75	14593949	G	A	standard	0.854	recommended
533985885	Affx-1251004921	AX-580598093	GGCATGAACTGAAGGACAGCCAATTTTATATCAAG[A/C]ATATGTTATGCCAAACGGCCGTTACGCCGAAATGG	M	2	1	2	1	10146	f		218	mosquito (Aedes albopictus)	chr3.122_5315574	chr3.122	5315574	A	C	standard	0.854	recommended
537095433	Affx-1249557252	AX-583659741	TTCTACATGGATTTTGCAGAAGATTTGTTCAGTAA[A/T]TCCTCCGGGAGTTATTTCAGAAATACCTGTTCGGA	W	4	1	2	1	10146	f		218	mosquito (Aedes albopictus)	chr1.34_222130	chr1.34	222130	T	A	standard	0.854	recommended
535314429	Affx-1251484764	AX-581898208	AAAAATGTTTTTAGGATTTGTGATATAGAATCAAG[A/T]AAGAGAAATTCACGTTGTCATTTTTATTGCATCCG	W	4	1	2	1	10146	f		218	mosquito (Aedes albopictus)	chr3.45_11006919	chr3.45	11006919	T	A	standard	0.854	recommended
536191710	Affx-1249104086	AX-582758767	CGATCCCAACAATAGTTTCGTGTGTCTTTTCTTCT[C/T]TACGTTTCGGGTATAACGCGTAACATTCTCGATGG	Y	2	1	2	1	10148	r		218	mosquito (Aedes albopictus)	chr3.75_15576442	chr3.75	15576442	C	T	standard	0.852	recommended
533056088	Affx-1250581370	AX-579674357	GTCTGATGTGTTTTGGTCGCGATAAATGTAAGAAT[A/T]ACGTGTTTTTTTTCGTGGGCGCGGAAAATTCCTTT	W	4	1	2	1	10148	f		218	mosquito (Aedes albopictus)	chr2.42_12302302	chr2.42	12302302	T	A	standard	0.852	recommended
537254811	Affx-1249637076	AX-583818469	ATAACATTGAAACATGTTAATGTTGAGCAAGCAGA[A/G]AAAATATGCACCCTCGAACAACAGATAGAAAACAT	R	2	1	2	1	10148	f		218	mosquito (Aedes albopictus)	chr1.59_1655997	chr1.59	1655997	A	G	standard	0.852	recommended
535946806	Affx-1248981702	AX-582514362	AGGTCAAGCTCCAATGTATTAAAAATGCTACTTCA[G/T]TTTATTTTTAGCCCATTCTTATCCATTGACATGCA	K	2	1	2	1	10150	r		218	mosquito (Aedes albopictus)	chr2.17_26535022	chr2.17	26535022	G	T	standard	0.85	recommended
537746707	Affx-1249882621	AX-584308317	AACTAGGTATAACTGGGTGAAAGAATTGTGAAGTA[C/G]ATTTTAAAAAAAAAAACTTGATAGAAAATGATAAA	S	4	1	2	1	10150	f		218	mosquito (Aedes albopictus)	chr2.102_992995	chr2.102	992995	G	C	standard	0.85	recommended
535420291	Affx-1251519721	AX-582002788	TTTTAATTAAAATTTCATTGTTTTCATGTTTGTTG[A/T]TATGGAAAGTGTGTTCATGGGAAAACAGAACATCT	W	4	1	2	1	10150	r		218	mosquito (Aedes albopictus)	chr3.49_10353631	chr3.49	10353631	T	A	standard	0.85	recommended
538734889	Affx-1250264231	AX-585288504	TTCTCTCTGACCGGCTCCGGCGCCGCCGCCCACAA[A/T]GTATATCATTTCGTTATCTGCATTTTCACACTGTG	W	4	1	2	1	10150	r		218	mosquito (Aedes albopictus)	chr2.186_4627847	chr2.186	4627847	T	A	standard	0.85	recommended
538524737	Affx-1250054024	AX-585079235	TGTTTGCTGTTTGTCACTTGATCCATCTCATTCGT[A/T]TATGAACAGGTTACCATTTCTATAAAAAGTACCTT	W	4	1	2	1	10152	r		218	mosquito (Aedes albopictus)	chr2.140_21202924	chr2.140	21202924	T	A	standard	0.848	recommended
536709280	Affx-1249362626	AX-583274748	TGCGCATTGAAATTTGAATCCTATCAACTTAGTTC[C/T]TACTGCATTGCTCCTGCGAGCAGATATTTACACAC	Y	2	1	2	1	10152	r		218	mosquito (Aedes albopictus)	chr1.132_274149	chr1.132	274149	T	C	standard	0.848	recommended
536662630	Affx-1249339329	AX-583228263	GTACCAAAAATTATGGAATTTTTGAGCCTGATTAT[G/T]TTTTAATGAATACTAGATTAATGACCAGAAATAAT	K	2	1	2	1	10152	r		218	mosquito (Aedes albopictus)	chr1.126_65722	chr1.126	65722	T	G	standard	0.848	recommended
533074111	Affx-1250590420	AX-579692366	GAATCAAACCTCTGCTAAACTATACGCTATATCCA[A/G]ATAAAATTTTCATCAAAAATGTATCTTACCCGTTT	R	2	1	2	1	10152	f		218	mosquito (Aedes albopictus)	chr2.48_1474701	chr2.48	1474701	A	G	standard	0.848	recommended
533964247	Affx-1250993263	AX-580576467	AGAAGATGAAAAAGAAGAAAGTGAGGATGGTTCGT[A/T]ATGTGTTATTATAAATAAGAGGTTGAGCAAATAAA	W	4	1	2	1	10152	r		218	mosquito (Aedes albopictus)	chr3.122_1319465	chr3.122	1319465	A	T	standard	0.848	recommended
537698290	Affx-1249858328	AX-584260138	AGAAGGTTTTAGAGTTGCAACCAGAATGAATAGAA[C/G]TAAATTGAACGAAAGTGCATGTCTCCCCGTCCCCG	S	4	1	2	1	10152	f		218	mosquito (Aedes albopictus)	chr1.91_7508079	chr1.91	7508079	G	C	standard	0.848	recommended
536197159	Affx-1249107225	AX-582764199	CGATAAGTTGATAACTTGTCTGGAACTTGTTGAAA[A/C]TCGTCTTTAATGTTGTTTAACTATGTCAATTGATG	M	2	1	2	1	10152	f		218	mosquito (Aedes albopictus)	chr3.75_16945197	chr3.75	16945197	A	C	standard	0.848	recommended
533304928	Affx-1250704680	AX-579923024	AAATCCATGGATTTTATCAGGAGTTCACAATTTAT[C/T]CTTATTTCAGAAAGCGAAATCCTTAACTCAAAAAA	Y	2	1	2	1	10154	r		218	mosquito (Aedes albopictus)	chr2.82_4405106	chr2.82	4405106	C	T	standard	0.846	recommended
536399437	Affx-1249208708	AX-582965926	GTATTCAAAAGCGATAATAGATACACAGTAAAAGG[A/T]ATAATAATAGAAATACAAATCGTAGTCGTGTAAGG	W	4	1	2	1	10154	f		218	mosquito (Aedes albopictus)	chr3.9_5991943	chr3.9	5991943	A	T	standard	0.846	recommended
535261609	Affx-1251467859	AX-581846071	GTAATTATCGTTAATTTTGGAACGATTTTTTTTTA[C/T]TTTACGACACTATTTAGGTACCTATATTTCCAAAT	Y	2	1	2	1	10154	r		218	mosquito (Aedes albopictus)	chr3.45_1597901	chr3.45	1597901	T	C	standard	0.846	recommended
536696498	Affx-1249357271	AX-583261997	AACACAAATAGGAACGTCACGTGTCCATAAAATAA[A/C]ATAAAATCGATTTGTTCATGGGTTCAGCTTGCTGC	M	2	1	2	1	10154	f		218	mosquito (Aedes albopictus)	chr1.131_7462225	chr1.131	7462225	A	C	standard	0.846	recommended
536212275	Affx-1249114838	AX-582779298	TCGATTAATTACTATCATTTATGGAACCATTCAAA[A/C]GACACTGATAAATAGCACAATTTTCTTCGCCTGAA	M	2	1	2	1	10154	f		218	mosquito (Aedes albopictus)	chr3.75_19068314	chr3.75	19068314	A	C	standard	0.846	recommended
534799839	Affx-1251289942	AX-581389154	AAATTTTTGCAGTGTTATCTGGTAAAATTGCTGAA[A/G]ATATCCAAGATTGTTTGGAAAAATTATGAAGGAAT	R	2	1	2	1	10154	f		218	mosquito (Aedes albopictus)	chr3.178_2202299	chr3.178	2202299	G	A	standard	0.846	recommended
537947923	Affx-1249992226	AX-584508933	ATCAATAGCACAATCACAAAAGCACAACATTCAAA[A/G]TAATATCATAATTGGCAACCCTGTCAGTGCTCCTC	R	2	1	2	1	10156	f		218	mosquito (Aedes albopictus)	chr2.125_4954550	chr2.125	4954550	A	G	standard	0.844	recommended
538472312	Affx-1250001586	AX-585027050	GAAGGTGCATGGGATTTGTGTGCATATCGTTTTTT[G/T]ATTCTACATATATAGTCACTCTCTACTTGAGGGAA	K	2	1	2	1	10156	r		218	mosquito (Aedes albopictus)	chr2.126_751190	chr2.126	751190	G	T	standard	0.844	recommended
534955461	Affx-1251348034	AX-581542678	TTAAATAAAGGTCCTGGAAGAATCTGCGTACTTTA[C/T]TTTTAGCCCTTGGACGACTGAAATGATATTTCTCG	Y	2	1	2	1	10156	r		218	mosquito (Aedes albopictus)	chr3.2_1564383	chr3.2	1564383	T	C	standard	0.844	recommended
536178911	Affx-1249097636	AX-582745987	GGCGTACACATTTCTCCATTCTCAAACTGGTTAGA[A/T]TTGATTGTGCTGTTCAAAGCTAGTTCTACAAATTG	W	4	1	2	1	10156	r		218	mosquito (Aedes albopictus)	chr3.75_13625641	chr3.75	13625641	T	A	standard	0.844	recommended
537500804	Affx-1249758121	AX-584063208	GTTTTAAACAGCCCTAAGTGTAAATTATTTATTTG[C/T]CGATTCGAATCTCTTAGTTGGTTAACTTTTATTTG	Y	2	1	2	1	10156	r		218	mosquito (Aedes albopictus)	chr1.85_20863586	chr1.85	20863586	T	C	standard	0.844	recommended
536662555	Affx-1249340269	AX-583228188	CATGCATCCATTTCATCCTACTTGATTATAATGCA[A/T]ATAAAAACGAAGATTAAATTTAGTCGTCGCTGTTA	W	4	1	2	1	10156	f		218	mosquito (Aedes albopictus)	chr1.127_2772425	chr1.127	2772425	T	A	standard	0.844	recommended
533758126	Affx-1250913942	AX-580373741	CACTTCCGGTTTCAAATGCACTGCACTTCAGATTT[C/T]GATGTGTTTTTCTGTAAAGATAAGAAGAGAAGTAG	Y	2	1	2	1	10156	r		218	mosquito (Aedes albopictus)	chr3.1_9842817	chr3.1	9842817	C	T	standard	0.844	recommended
535691264	Affx-1248883572	AX-582268861	AGAAACTTGTTATTGAGTACAAATTGTGACTGAAG[A/T]TGAAAGGTTCTTGCTAACGATGCCAACGAGTACGA	W	4	1	2	1	10156	f		218	mosquito (Aedes albopictus)	chr3.7_4206552	chr3.7	4206552	A	T	standard	0.844	recommended
538503181	Affx-1250032465	AX-585057740	CTTCCAACAATAATATTGTTGAACAGTACACCTTC[G/T]TATGCGGGTACTGTTACGAAATCTCCAACTTTTTT	K	2	1	2	1	10156	r		218	mosquito (Aedes albopictus)	chr2.140_11177756	chr2.140	11177756	T	G	standard	0.844	recommended
533603151	Affx-1250853780	AX-580220969	TGTATTATTTTTTTTACAAATTGTTAGGAAGCATT[A/G]ATTTCCTGTTAAACTGGCAATCTATCCATTACAAT	R	2	1	2	1	10156	r		218	mosquito (Aedes albopictus)	chr2.97_1293837	chr2.97	1293837	A	G	standard	0.844	recommended
536053990	Affx-1249035643	AX-582621325	GATCGTTTTGTCCTACTCTTGACCTACTTAAACTA[C/T]AATTGGGCTTTTCTAAAACCTCATATTGCATTAGA	Y	2	1	2	1	10156	f		218	mosquito (Aedes albopictus)	chr2.172_3871616	chr2.172	3871616	T	C	standard	0.844	recommended
533573668	Affx-1250840159	AX-580191546	CGAATTATTCTCTGTCCCACTCTTAGATCACAATT[G/T]TACGAGTTCTGTTCAGACGCAGGTTGCTGTTCCAT	K	2	1	2	1	10156	f		218	mosquito (Aedes albopictus)	chr2.95_772662	chr2.95	772662	T	G	standard	0.844	recommended
535922363	Affx-1248973223	AX-582493421	TCTTTACAATCGATAATAAAACATATTTTATATTT[C/T]ATGTTTTACTAACCGGTAATTCTTACGATAAAGTA	Y	2	1	2	1	10156	r		218	mosquito (Aedes albopictus)	chr2.17_22944461	chr2.17	22944461	C	T	standard	0.844	recommended
533454745	Affx-1250780904	AX-580072732	GATTTCAAACGGCTTCGGAGCAATGATATTCGATA[C/T]AGCGACTATGAAACATCGTCATCGTCGTCGGGTGT	Y	2	1	2	1	10156	f		218	mosquito (Aedes albopictus)	chr2.87_12973562	chr2.87	12973562	C	T	standard	0.844	recommended
533097666	Affx-1250602342	AX-579715912	AGATATCTAACTTATCCGTATTTCTTAAACAAAAC[A/G]AAAACGCTTTCAATGTGCATCTAATGTACACCATA	R	2	1	2	1	10158	f		218	mosquito (Aedes albopictus)	chr2.48_8390219	chr2.48	8390219	A	G	standard	0.842	recommended
537539094	Affx-1249779157	AX-584101418	TCACCTTTCACAAATCGTACCCAGTCAATGTAGAA[C/T]TCAAAATTCAAAAACAATTCTGCATGGCATTTCCT	Y	2	1	2	1	10158	f		218	mosquito (Aedes albopictus)	chr1.87_699634	chr1.87	699634	T	C	standard	0.842	recommended
536465914	Affx-1249240966	AX-583032255	TAATCCGATCGGTACTCATCGTAGGGCAGCCGTTT[C/G]GTTCGGTACAGCTTTATGACGGTAATCAGTACGAT	S	4	1	2	1	10158	r		218	mosquito (Aedes albopictus)	chr3.95_4727403	chr3.95	4727403	G	C	standard	0.842	recommended
535804860	Affx-1248924262	AX-582377590	TTCAGCTTGACATAATGCTAAATGGCGTGTTTCAT[A/T]ACTTTCACATCTTCGCTAATTATGTAATATTTCTT	W	4	1	2	1	10158	r		218	mosquito (Aedes albopictus)	chr3.74_303672	chr3.74	303672	T	A	standard	0.842	recommended
536749381	Affx-1249382645	AX-583314732	GGAGCTCAACCGAACATCCCAGCGTTATAACATTT[C/T]CATTAGTAGTGCCATTTTACCGGTCAATTAGTTAT	Y	2	1	2	1	10158	r		218	mosquito (Aedes albopictus)	chr1.139_5001695	chr1.139	5001695	C	T	standard	0.842	recommended
537486901	Affx-1249751140	AX-584049354	TGTTGACGGTTGGTGCTGCAAAATGTGCTCGATTT[C/T]CATGTTTGACATCCCTGGAGGCTACAATATCGGTC	Y	2	1	2	1	10158	r		218	mosquito (Aedes albopictus)	chr1.85_17922546	chr1.85	17922546	T	C	standard	0.842	recommended
536087578	Affx-1249052461	AX-582654833	TCAATTAATGCAACACACAAGCAAATAGTACGACA[A/G]AAATGTTGAACTGGCAACCAGCTGCAACGATTTAC	R	2	1	2	1	10158	f		218	mosquito (Aedes albopictus)	chr3.74_4976435	chr3.74	4976435	A	G	standard	0.842	recommended
533462223	Affx-1250784680	AX-580080206	AACACGAGAAAAATTTCGCAATCAGCATCAATAAA[A/G]TAATATATTTATTCATCTGAAATTCTACCTAAATG	R	2	1	2	1	10158	f		218	mosquito (Aedes albopictus)	chr2.87_13957870	chr2.87	13957870	A	G	standard	0.842	recommended
537133419	Affx-1249576229	AX-583697571	ATATAAAAAGCTGTTCCATATACATATGGAAGACT[G/T]AACAGAACAAGTACGTACAAATGCAAACCTTAGGC	K	2	1	2	1	10158	f		218	mosquito (Aedes albopictus)	chr1.37_1324960	chr1.37	1324960	G	T	standard	0.842	recommended
533987490	Affx-1251004938	AX-580599698	AACACATTTTGGGTTACTGAGTGTGTATGTGTTTT[C/T]CATTGAAGCTTCGAACTCAACCTTTCTATTATTAT	Y	2	1	2	1	10158	r		218	mosquito (Aedes albopictus)	chr3.122_5316420	chr3.122	5316420	C	T	standard	0.842	recommended
538130352	Affx-1250174715	AX-584690614	ATTGCAGTTGTGTTTAAATGCGACAAACGTAAGAA[A/G]AAAAAATGTCTCAACCAGTCAGTGCAGTGATTGGA	R	2	1	2	1	10160	f		218	mosquito (Aedes albopictus)	chr2.17_6402753	chr2.17	6402753	G	A	standard	0.84	recommended
534210193	Affx-1251093957	AX-580815870	TTTCCTTCTTTGAGGTAAGTCTCTAATTCCAAATC[A/G]TAATTTCACGCAATTCCCTTCGTAACCACAAGTTC	R	2	1	2	1	10160	f		218	mosquito (Aedes albopictus)	chr3.147_768632	chr3.147	768632	A	G	standard	0.84	recommended
537293981	Affx-1249656702	AX-583857373	TGTGTTTCTTCTGAACTGTTATAAGTGAAGAGATG[A/C]AAAAAATAAGGTCTCCGGCTGGCCGTGCCCAATCA	M	2	1	2	1	10160	f		218	mosquito (Aedes albopictus)	chr1.67_9058645	chr1.67	9058645	A	C	standard	0.84	recommended
534698607	Affx-1251254770	AX-581291918	CCATCCATATTAGAGACCACACAACTTTCCTAAAC[C/T]ACAGATTAAGATCAGCACTAATCTAACTCGAAATG	Y	2	1	2	1	10160	f		218	mosquito (Aedes albopictus)	chr3.170_10786009	chr3.170	10786009	C	T	standard	0.84	recommended
533356505	Affx-1250731774	AX-579974570	TATATTTATATCAAAAGAACCCAAGACCCATATCA[G/T]TTACAAAAGCCACCTTCATTATTTGACATCCTCCA	K	2	1	2	1	10160	f		218	mosquito (Aedes albopictus)	chr2.82_16978231	chr2.82	16978231	T	G	standard	0.84	recommended
533154786	Affx-1250629844	AX-579772971	AAGAGGTGTCTTGTGTGGCTGTGGAAGTGAAATTT[C/T]CTTATATTTCCAGATTTCATGATTACCCAGATCAA	Y	2	1	2	1	10160	r		218	mosquito (Aedes albopictus)	chr2.60_7526985	chr2.60	7526985	C	T	standard	0.84	recommended
537052418	Affx-1249535656	AX-583616901	TTTAATCAATATTGTCATTCTCGAAGTTTACACAT[A/T]TCCTAGTATAAGATGTATACTGAGTTGGTATACGA	W	4	1	2	1	10160	f		218	mosquito (Aedes albopictus)	chr1.25_8746653	chr1.25	8746653	A	T	standard	0.84	recommended
534669007	Affx-1251244388	AX-581262572	ATTCGGAGGATCATTATGACCAAACGTATCTTGAA[A/T]TCTCAGATTAATCCATTTTGGACCCTACTCTAACT	W	4	1	2	1	10160	f		218	mosquito (Aedes albopictus)	chr3.170_5259013	chr3.170	5259013	A	T	standard	0.84	recommended
537527534	Affx-1249773333	AX-584089897	ACTACTTTTAATTTCAGCCGCCGAGCACAAATGCA[A/G]AAGCAGAACAACCGATGCGCCGGCTGTGGAATGAA	R	2	1	2	1	10160	f		218	mosquito (Aedes albopictus)	chr1.85_26981021	chr1.85	26981021	G	A	standard	0.84	recommended
536182146	Affx-1249099746	AX-582749217	TACTCTGGATTTAGATGTATCTCGATTCCATAAAA[A/G]ATATAAACATGTTGACACGTTAGGCATAGTCAACC	R	2	1	2	1	10160	f		218	mosquito (Aedes albopictus)	chr3.75_14288354	chr3.75	14288354	G	A	standard	0.84	recommended
534018691	Affx-1251020587	AX-580630798	GCAATGATTTTTTTCACAAATAAAAACAGCATTTT[C/T]CATTAAATTTTTCCTGTAACATTATTCCGTGAAAC	Y	2	1	2	1	10160	r		218	mosquito (Aedes albopictus)	chr3.136_828180	chr3.136	828180	T	C	standard	0.84	recommended
537907840	Affx-1249961998	AX-584468988	CTTTGGCCGTTCATTGGCCTTAACTGTAACATTTT[C/T]CTTACTCAAATCTTGACGAACAATCATTATGTAGC	Y	2	1	2	1	10160	r		218	mosquito (Aedes albopictus)	chr2.122_2241066	chr2.122	2241066	C	T	standard	0.84	recommended
533625592	Affx-1250862294	AX-580243174	AACGGTTTTTTTTTTAACTTGAGGCTATGATATTA[C/T]TTTTAGTAAATATAGAAAAGCCGACCCATATTCTT	Y	2	1	2	1	10162	r		218	mosquito (Aedes albopictus)	chr2.97_3980366	chr2.97	3980366	C	T	standard	0.838	recommended
534309756	Affx-1251135174	AX-580912912	AAGTCAGTCACCACGACCTTGCCGGCTCCCATAGA[C/T]TTTGCTGTGATGAGCGTTACCAATCCAATCGGACC	Y	2	1	2	1	10162	r		218	mosquito (Aedes albopictus)	chr3.16_548434	chr3.16	548434	C	T	standard	0.838	recommended
534426312	Affx-1251172480	AX-581027674	TTTCAAAGTTGAAATGGAGCATATTCCGATTGAAA[A/C]TGATACATGCTTTGTTGAGAATGAACCTCTGAGTA	M	2	1	2	1	10162	f		218	mosquito (Aedes albopictus)	chr3.163_1691898	chr3.163	1691898	A	C	standard	0.838	recommended
536127642	Affx-1249072495	AX-582694827	GGAAATGTTTAGAAGAACACTTAGTAGAATAGTCA[A/T]TTTCCAGTGAGAACGAAGAACCAGAAAAAATGCAC	W	4	1	2	1	10162	f		218	mosquito (Aedes albopictus)	chr3.75_4460318	chr3.75	4460318	A	T	standard	0.838	recommended
536126671	Affx-1249072013	AX-582693859	TACTAGTATAGATATGAACCGCAAGTTTGTTTGAA[A/T]GAAATGAAATATCAAAGTTATGTCTCTGAATGACA	W	4	1	2	1	10162	f		218	mosquito (Aedes albopictus)	chr3.75_4279256	chr3.75	4279256	T	A	standard	0.838	recommended
535559719	Affx-1248840318	AX-582139731	AAGTCAATCTGAGTTGGGTATGTGAAAACCTTATA[A/T]TCTAGAAGCCCTCTTTTGAGACAGCAGCTTGAAAT	W	4	1	2	1	10162	f		218	mosquito (Aedes albopictus)	chr3.66_1917561	chr3.66	1917561	T	A	standard	0.838	recommended
534728009	Affx-1251266275	AX-581318224	GCGCCACTGTTCTGCTTATAAGCTTGCGGTATGTT[A/T]CAGTTTTCCTAATAATATACCTTCCTGTGTGTGTC	W	4	1	2	1	10162	r		218	mosquito (Aedes albopictus)	chr3.170_15366566	chr3.170	15366566	T	A	standard	0.838	recommended
537284862	Affx-1249652137	AX-583848298	ATGATCATATCACACCATATGATCATATATCATCA[A/T]AAGATCGCTTTGGTTTTGTCAAGATTTTGTTCTCT	W	4	1	2	1	10162	f		218	mosquito (Aedes albopictus)	chr1.67_4413750	chr1.67	4413750	T	A	standard	0.838	recommended
533397942	Affx-1250751135	AX-580015985	TGTGAACAATAACTATTTTAGAAAATTGGCTTCTG[A/T]ATACCATAGTTTCCTTTTCATACAACTAATTTCAG	W	4	1	2	1	10162	r		218	mosquito (Aedes albopictus)	chr2.87_802650	chr2.87	802650	A	T	standard	0.838	recommended
538780008	Affx-1250309355	AX-585333542	TTGCAGTAGAAACACTGCTTGTTGTTCATCAAGTG[C/T]TGGATGATGCAATTTCTAGATTTTGAGGATAGAAT	Y	2	1	2	1	10162	r		218	mosquito (Aedes albopictus)	chr2.186_20086713	chr2.186	20086713	T	C	standard	0.838	recommended
537294911	Affx-1249657168	AX-583858301	ACAGTGGCGTGCAAAAGTACTATCAACGATCTAAG[C/T]CTAGCTAAGAACCTATTAAAATTTTGGGAAAAGAA	Y	2	1	2	1	10162	f		218	mosquito (Aedes albopictus)	chr1.67_9442086	chr1.67	9442086	C	T	standard	0.838	recommended
533452349	Affx-1250778402	AX-580070337	CTTGAACTGGCATACAATAAACTAAAATTAAACGA[A/G]TTATCGTAGATGATGTTGAAACATGGTTCCGACGA	R	2	1	2	1	10162	r		218	mosquito (Aedes albopictus)	chr2.87_12068973	chr2.87	12068973	G	A	standard	0.838	recommended
534294356	Affx-1251126938	AX-580897640	TGTGAAAGGTAAATGTATATCACGTTGCTAATAAA[A/G]TAGTTCACGAAAATATATACAAAATCCGGGTAGTG	R	2	1	2	1	10162	f		218	mosquito (Aedes albopictus)	chr3.159_480459	chr3.159	480459	A	G	standard	0.838	recommended
537431371	Affx-1249723356	AX-583994011	AAAATTTATTTTACATTCTCACGATTTGTACCATA[A/C]ATTTGTATGTAAGAGATAGATTAGGAATCTTTCTT	M	2	1	2	1	10162	r		218	mosquito (Aedes albopictus)	chr1.85_3993567	chr1.85	3993567	C	A	standard	0.838	recommended
534892505	Affx-1251323204	AX-581480174	TTTTTGTTTTTTTATTTGATGTAACTTACTTCATG[A/G]TAATGTCTCCTTCTATGATTAGCAAATTCCAGGTC	R	2	1	2	1	10162	r		218	mosquito (Aedes albopictus)	chr3.180_10094354	chr3.180	10094354	A	G	standard	0.838	recommended
537992824	Affx-1250037139	AX-584553660	TTATCTATATGCTGGCGATGCATAAAATTGGAACA[A/G]AAATTTGTTTATGGATTCTTGGCTTCCTGGGGTCT	R	2	1	2	1	10162	f		218	mosquito (Aedes albopictus)	chr2.140_12922919	chr2.140	12922919	G	A	standard	0.838	recommended
533574663	Affx-1250840656	AX-580192541	TTGAGCATGCTTAAGGATTTTCTAGTGATGGTAAA[A/C]ATTAAATAAAAAAAAACTGTCATGCACAGAACTCT	M	2	1	2	1	10162	f		218	mosquito (Aedes albopictus)	chr2.95_1359200	chr2.95	1359200	A	C	standard	0.838	recommended
533376842	Affx-1250740612	AX-579994899	ATTGGTTTACTAATTACAACGCTGCAACGGAATAG[G/T]TATCTACATTCCCTAATGCTGTTTCGAAATGTTCG	K	2	1	2	1	10162	r		218	mosquito (Aedes albopictus)	chr2.82_20198516	chr2.82	20198516	G	T	standard	0.838	recommended
533503530	Affx-1250805171	AX-580121479	ATCTCTGTAAATTTCCGCTAGTATTAAGTTTGGAA[A/T]CTGTTGATTTTTTGAGTGGGACTAAAGTGGATCTT	W	4	1	2	1	10164	f		218	mosquito (Aedes albopictus)	chr2.87_22224732	chr2.87	22224732	A	T	standard	0.836	recommended
536681693	Affx-1249349864	AX-583247232	TTGTGAAATACAAATGAGTTTCCAACAAATTCAAT[A/T]TCGGAAGCCCTTCTTATAGTTGTCCAGCAGTCGGA	W	4	1	2	1	10164	f		218	mosquito (Aedes albopictus)	chr1.131_2781798	chr1.131	2781798	T	A	standard	0.836	recommended
537733146	Affx-1249875847	AX-584294825	TAAAATCAATAAATTGACAACGATGCTCGCTCAAA[A/C]TCATTCTAGAAATTTTAAAATTATACAAAGACAAA	M	2	1	2	1	10164	f		218	mosquito (Aedes albopictus)	chr2.100_1820110	chr2.100	1820110	C	A	standard	0.836	recommended
535405994	Affx-1251515424	AX-581988692	TTGGAAATGTTTTTATGAATGAAGGTGAGAAACTG[A/G]TTAGTTTGGTAGAGGAAATGCAGTTTATTTCGACA	R	2	1	2	1	10164	r		218	mosquito (Aedes albopictus)	chr3.49_8158611	chr3.49	8158611	G	A	standard	0.836	recommended
533796931	Affx-1250930768	AX-580411802	AGAAATACTCCATGACCATCAATTATATTTACAAT[A/T]TACATTCAATCAAACTCGTAACAGCAATCATGACA	W	4	1	2	1	10164	f		218	mosquito (Aedes albopictus)	chr3.109_3235079	chr3.109	3235079	A	T	standard	0.836	recommended
538075663	Affx-1250120014	AX-584636057	TCCTGTAACTATCCAAATAGTTAATAAAACTGAAC[A/G]TAACACTGAAGTAACAATATGCCGCCATAATATTC	R	2	1	2	1	10164	f		218	mosquito (Aedes albopictus)	chr2.161_315680	chr2.161	315680	A	G	standard	0.836	recommended
536170741	Affx-1249093566	AX-582737839	GTATTTGTAACTGATTGGGATCTGGTGGGGAGGAG[A/T]TTGATTCCGCTGACAAATAAGTCATCCTAATGACG	W	4	1	2	1	10164	r		218	mosquito (Aedes albopictus)	chr3.75_12227760	chr3.75	12227760	A	T	standard	0.836	recommended
536338887	Affx-1249178415	AX-582905621	AGTAATACGAGGGATAAATTGTGTTTTAATAAGTA[A/G]TAATCAAACATGTCACTATTTCAGCATTGAGGACC	R	2	1	2	1	10164	f		218	mosquito (Aedes albopictus)	chr3.78_2624898	chr3.78	2624898	G	A	standard	0.836	recommended
535839519	Affx-1248938251	AX-582411697	TTTATAAAGGATATATATTAGGTGAGTCATTTGAT[G/T]TTTAACTATTTCAGTCAACAACGTTAATGAAGTGA	K	2	1	2	1	10164	r		218	mosquito (Aedes albopictus)	chr2.17_9604056	chr2.17	9604056	T	G	standard	0.836	recommended
538705032	Affx-1250234369	AX-585258753	ACTGGAACAGATCCTGCTTCTCTTCCTAATATTCA[A/T]TGATTACCATAGAATTTCTGTATCTAAAAGTCGAA	W	4	1	2	1	10164	r		218	mosquito (Aedes albopictus)	chr2.179_4380137	chr2.179	4380137	T	A	standard	0.836	recommended
536289478	Affx-1249153625	AX-582856339	GTCGCTGTATTTACAATTGTGCAGGCTGAAGAAAA[G/T]AACGCAATATAGTCAAGACATCGGATTGCTAATAC	K	2	1	2	1	10164	f		218	mosquito (Aedes albopictus)	chr3.77_12736593	chr3.77	12736593	T	G	standard	0.836	recommended
535138884	Affx-1251419570	AX-581724628	AACATAAGCAAGATTAAAAATTTAAAAGTTTTCAC[A/T]TTGCATTTCAACCCTCGTCCTATCCTAACAAATTC	W	4	1	2	1	10164	r		218	mosquito (Aedes albopictus)	chr3.29_3987508	chr3.29	3987508	T	A	standard	0.836	recommended
533269253	Affx-1250686906	AX-579887392	CCAAATTCGAAACAATTAATCACCCTGCTGCAGAG[C/T]ATTTCCATATGGTTCCTGAATAGTGCTCAAGCCAG	Y	2	1	2	1	10164	r		218	mosquito (Aedes albopictus)	chr2.68_3404396	chr2.68	3404396	T	C	standard	0.836	recommended
537632255	Affx-1249825510	AX-584194307	ATTCAGGAAATTGATTCGGCTGTGATTTTATCAAA[A/C]CATGCGTCCAATGGAACACCACCCCCATACTCCCC	M	2	1	2	1	10164	f		218	mosquito (Aedes albopictus)	chr1.90_13980723	chr1.90	13980723	A	C	standard	0.836	recommended
533419661	Affx-1250763392	AX-580037690	GATTTTTCTTCTGGGCTGTAATATGTTGAAATGTA[A/T]CAGATTTTCATACGCATCAATTTCCTTTAGATTAT	W	4	1	2	1	10164	f		218	mosquito (Aedes albopictus)	chr2.87_5900765	chr2.87	5900765	T	A	standard	0.836	recommended
535052519	Affx-1251386501	AX-581639121	AACGATTATTATGTTTGCGATTGAAACGATGAATC[A/G]AAATCCCTGTTAAGCTCGAGATTGACTGGTTGTGA	R	2	1	2	1	10164	f		218	mosquito (Aedes albopictus)	chr3.23_605434	chr3.23	605434	A	G	standard	0.836	recommended
536559788	Affx-1249288896	AX-583125791	CGAGCTACCATGGATGGCGCAACCTATGTATAAAG[A/C]AAAATCAGTGCATTTTATCAAATTTCTTATACCTA	M	2	1	2	1	10164	f		218	mosquito (Aedes albopictus)	chr1.113_226164	chr1.113	226164	A	C	standard	0.836	recommended
536775146	Affx-1249395572	AX-583340453	TACACTCCAAAGATTCCTACGCTTTTATTATTCAA[A/T]TGATTTCATTCCGAACTACAAGCTTTTATTTAATA	W	4	1	2	1	10164	r		218	mosquito (Aedes albopictus)	chr1.139_10010996	chr1.139	10010996	A	T	standard	0.836	recommended
537534382	Affx-1249774951	AX-584096725	AGAGCTACATAAAATGCTATTCATTTAGATTTTTG[A/G]ATGTTTTCGTTATGTGACGACACTAACCATCACAC	R	2	1	2	1	10164	r		218	mosquito (Aedes albopictus)	chr1.85_27457756	chr1.85	27457756	G	A	standard	0.836	recommended
533193958	Affx-1250650440	AX-579812124	TTAACATGCTGTTTTTTTCTTCATAGTGTATAGAA[A/T]TAGAGGTTAATCGCAAAAAGGGTGTTTTTGATTAA	W	4	1	2	1	10164	f		218	mosquito (Aedes albopictus)	chr2.60_16723394	chr2.60	16723394	A	T	standard	0.836	recommended
537226406	Affx-1249620775	AX-583790183	TCCGTCCCCACCCGTTTTGCGTACGTGCCTGGTGA[A/G]ATTTGTAGTGGATGAACCAGATAGATATCCACGAC	R	2	1	2	1	10164	r		218	mosquito (Aedes albopictus)	chr1.50_11368867	chr1.50	11368867	G	A	standard	0.836	recommended
534782594	Affx-1251285290	AX-581372149	GAGGAGCAGGACAGAGGGAAGACAAAAGTCGGTTT[A/T]ACATGCATCATCTTCGAAGAAGCGAAATGAATTTC	W	4	1	2	1	10164	r		218	mosquito (Aedes albopictus)	chr3.178_322726	chr3.178	322726	A	T	standard	0.836	recommended
533754112	Affx-1250912986	AX-580369729	GTAATACGCCTACAACTAACTATATCCTTATAAAA[A/C]TATGTCAGTGTACGTCTTCTATTTTGTCCCGCAAA	M	2	1	2	1	10164	f		218	mosquito (Aedes albopictus)	chr3.1_9573335	chr3.1	9573335	C	A	standard	0.836	recommended
536920929	Affx-1249468337	AX-583485862	TTACTTCATTGAGTGTCTCTTTCTTTGCTTTATTT[C/T]CACTTTTGAATATGTCTGTATCACTTTCAAATAAC	Y	2	1	2	1	10164	r		218	mosquito (Aedes albopictus)	chr1.149_5881654	chr1.149	5881654	C	T	standard	0.836	recommended
533637484	Affx-1250867318	AX-580254946	GCGCGAACAAACGGAGATACATAAGAGTCTGAAAG[A/G]AAAATGATCGCATCACAATACAAGGAACGTAATCT	R	2	1	2	1	10164	f		218	mosquito (Aedes albopictus)	chr2.97_6217022	chr2.97	6217022	A	G	standard	0.836	recommended
533693024	Affx-1250886786	AX-580309666	TTTTGCTGAACTCTTACTTAAAACCCTAGAATAAT[A/T]ACTGATAAAAGTATATCCCAAAATAAGTATATATT	W	4	1	2	1	10166	f		218	mosquito (Aedes albopictus)	chr2.97_14154530	chr2.97	14154530	A	T	standard	0.834	recommended
537405994	Affx-1249710671	AX-583968788	GAACTAATTGATTTCAGGCGGTAGAAGCTAATTTT[C/T]GATATTCCTCAGTACCTAATATTCTCAAAGCTATA	Y	2	1	2	1	10166	r		218	mosquito (Aedes albopictus)	chr1.75_539597	chr1.75	539597	C	T	standard	0.834	recommended
538374403	Affx-1250418803	AX-584934008	GCACCCAGGGCGACTAATATGTATAAGTTTAGTAA[A/G]TATGAGTAATTTTCGAAACCTCTAGCGATAGCTCA	R	2	1	2	1	10166	f		218	mosquito (Aedes albopictus)	chr2.198_2539589	chr2.198	2539589	G	A	standard	0.834	recommended
534560432	Affx-1251214137	AX-581156080	GGAACGTTTCATTTGGGAAATTATCCGAAATGACT[C/T]TTTACGAATTCATGAGTAACTAAATCTACTTATTT	Y	2	1	2	1	10166	r		218	mosquito (Aedes albopictus)	chr3.168_2850655	chr3.168	2850655	C	T	standard	0.834	recommended
535703638	Affx-1248887891	AX-582281058	GCAGTCTATCAATTGTGAATGCTAATATTGAGTGA[A/T]TTGAGCCTCGCAGTGTATAGTGTGCTAAATCCGTT	W	4	1	2	1	10166	r		218	mosquito (Aedes albopictus)	chr3.7_6116034	chr3.7	6116034	T	A	standard	0.834	recommended
537822815	Affx-1249920668	AX-584384264	TATCGAGTTGTAAACCGGACGTGACGCATATGAAA[C/G]TGCATCATTGAACGCACACAGCGCATTACACCCGG	S	4	1	2	1	10166	f		218	mosquito (Aedes albopictus)	chr2.105_670681	chr2.105	670681	G	C	standard	0.834	recommended
537606861	Affx-1249812852	AX-584168995	CTCATATTCGAGAAATGGTGTGGTAACAATCAAAT[C/T]TATCGTATTTTTATCACATTTTCTATCGAGATTGA	Y	2	1	2	1	10166	f		218	mosquito (Aedes albopictus)	chr1.90_8940675	chr1.90	8940675	T	C	standard	0.834	recommended
535444882	Affx-1248801356	AX-582026857	TCATCCTTATATTTCTGCAACGTCACCTTCGACAG[C/T]TTTTCCCTTATTGACACGTTGATCAAATACTCTGG	Y	2	1	2	1	10166	r		218	mosquito (Aedes albopictus)	chr3.49_16640207	chr3.49	16640207	C	T	standard	0.834	recommended
538052568	Affx-1250096907	AX-584613106	GAGTTACTTAAGCCCAGCGTACAGAAACTTGAATC[G/T]GAATCGGCCGTTCTAGATTGGCTCTGCAAGAAGTT	K	2	1	2	1	10166	f		218	mosquito (Aedes albopictus)	chr2.155_7504848	chr2.155	7504848	T	G	standard	0.834	recommended
535121849	Affx-1251413911	AX-581707785	TCTAATCCTTTCGGATACAGCTTCTGTTTTGTTAT[C/T]TGATTTTCACTGGTTACTGTTTTCACATCGTGTAC	Y	2	1	2	1	10166	r		218	mosquito (Aedes albopictus)	chr3.29_532765	chr3.29	532765	C	T	standard	0.834	recommended
535765045	Affx-1248910579	AX-582341647	AAAACAGGACGATGTAATTTACTTGACATATTAAA[A/G]ATAAAGCGCATTTTCTGTGACTTTCTTGTAGAACT	R	2	1	2	1	10166	f		218	mosquito (Aedes albopictus)	chr3.72_936688	chr3.72	936688	G	A	standard	0.834	recommended
537865329	Affx-1249940718	AX-584426634	ATTTATCTGGAATGAGAGCACTATTCTAAACATTA[C/T]TGACTAATATGTATGCCAAAGTTGGTGCAATAAAT	Y	2	1	2	1	10166	r		218	mosquito (Aedes albopictus)	chr2.107_7869069	chr2.107	7869069	C	T	standard	0.834	recommended
533938030	Affx-1250983301	AX-580550370	CTCCTGACTACACGTTGTTTTAACACACCGATGAC[A/G]ACCACGTATTGGACTATACGTTGAAAAGTTTGACA	R	2	1	2	1	10166	f		218	mosquito (Aedes albopictus)	chr3.12_1293400	chr3.12	1293400	G	A	standard	0.834	recommended
533455812	Affx-1250781457	AX-580073799	TTTCAAGGTGTATAACTTCGACTTAAAAGGGTAAA[C/T]ATCAAAAGTGTCGAAACGTCCGAATCGTTCAACTC	Y	2	1	2	1	10166	f		218	mosquito (Aedes albopictus)	chr2.87_13196746	chr2.87	13196746	C	T	standard	0.834	recommended
537540213	Affx-1249779707	AX-584102523	ATAAATAGTAGTTTTCAATCGCAAATTTGTTATTT[C/T]AAAACCACGAAGTCGGTTTGATACAAACCGGCAAA	Y	2	1	2	1	10166	f		218	mosquito (Aedes albopictus)	chr1.9_20724	chr1.9	20724	C	T	standard	0.834	recommended
536651533	Affx-1249334768	AX-583217233	TTGGGGCAACTGATCCACAACATTAACTTTAATCA[C/T]CAACCTCCAGTACAAAACCTTCCACTCGGCTCCAA	Y	2	1	2	1	10166	f		218	mosquito (Aedes albopictus)	chr1.124_4144393	chr1.124	4144393	C	T	standard	0.834	recommended
536838931	Affx-1249428520	AX-583404048	TGTACTTATTACCCAGACGCAATATTAACCCATCA[C/T]AACTTTGCATGCCAAAGCAAAGTGCCCCTCTCAGA	Y	2	1	2	1	10166	f		218	mosquito (Aedes albopictus)	chr1.147_414480	chr1.147	414480	C	T	standard	0.834	recommended
536287089	Affx-1249151576	AX-582853955	TGTGGTTGCTCCGCTAGGCAAGCTGGCTTCAGTGT[C/T]CTTTTAAGAAACTTGCCCAATCTTAGCAAAGCTAT	Y	2	1	2	1	10166	r		218	mosquito (Aedes albopictus)	chr3.77_11930265	chr3.77	11930265	T	C	standard	0.834	recommended
536580825	Affx-1249298365	AX-583146782	TATGAACAGACGAAATATTCCCCAGACCTTGTAAG[C/T]TTTACATATACTCATATCGACTTCACGTTTGCCCA	Y	2	1	2	1	10166	r		218	mosquito (Aedes albopictus)	chr1.113_3668977	chr1.113	3668977	T	C	standard	0.834	recommended
536143010	Affx-1249079689	AX-582710159	TAGGCCGGTGTCATCGGCATTGTTGCATGTATGTA[C/T]GTTACTATTAGCTTACGCTATTTTCCACTTCACTA	Y	2	1	2	1	10166	r		218	mosquito (Aedes albopictus)	chr3.75_6919965	chr3.75	6919965	C	T	standard	0.834	recommended
538843810	Affx-1250373167	AX-585397135	GGGGAAATTTTGTGAGAAAGTTGGCATAGCGGAGT[A/T]ATCATTTGTCATGTTCATATTTCCTTTTGACATTT	W	4	1	2	1	10166	r		218	mosquito (Aedes albopictus)	chr2.190_2507132	chr2.190	2507132	T	A	standard	0.834	recommended
535697678	Affx-1248885557	AX-582275211	TACCCTATTATTGTTTACTTTAGATCTAGAATCAG[A/T]CAAAGTCACTCCGTTTAAAGGTAGATAATGTGTTG	W	4	1	2	1	10168	f		218	mosquito (Aedes albopictus)	chr3.7_5248824	chr3.7	5248824	A	T	standard	0.832	recommended
535679208	Affx-1248879519	AX-582256963	GCACTGATGATAATGCTCCTACACTGTCTGGATTA[A/G]CTTCATTTTCATCGGTTAATCTCTTCATTATTTCG	R	2	1	2	1	10168	r		218	mosquito (Aedes albopictus)	chr3.7_2798893	chr3.7	2798893	G	A	standard	0.832	recommended
536007021	Affx-1249011754	AX-582574471	TGCTCTATTTTCTGGTTCTAAAGCCAGCCGGTTTT[C/T]TATTTCATCCATTCCGTTTATTTCAAAACATTCTT	Y	2	1	2	1	10168	r		218	mosquito (Aedes albopictus)	chr2.17_38483965	chr2.17	38483965	C	T	standard	0.832	recommended
537185956	Affx-1249600587	AX-583749890	ATCTCTATAACGAATGGGTCGACGCGAGAACATAT[C/T]TGTCACTGTCAGACTTATCGATTTTGTTCAGAAAA	Y	2	1	2	1	10168	r		218	mosquito (Aedes albopictus)	chr1.5_332575	chr1.5	332575	C	T	standard	0.832	recommended
537890334	Affx-1249954577	AX-584451558	TTTTTTGTTGCATTAACTAAGCAATGATGAGTAAG[A/G]AAAAAGCAGGAGACTATGTCCTACCTAATGCAATG	R	2	1	2	1	10168	f		218	mosquito (Aedes albopictus)	chr2.119_205739	chr2.119	205739	G	A	standard	0.832	recommended
535387826	Affx-1251508748	AX-581970717	GGACTGATGGTCAGCACTACGGTACTATTTATCGA[A/G]AAAATAGTTCATTCGTTAAAAAATGGTGGACTGCG	R	2	1	2	1	10168	f		218	mosquito (Aedes albopictus)	chr3.49_6269835	chr3.49	6269835	G	A	standard	0.832	recommended
537854709	Affx-1249935454	AX-584416031	AAACTGAAAACGAATCACACGATTGAAACACAAAG[A/T]TTGATTTCCATCGTGCGAAACAATTTCTCTCTCAT	W	4	1	2	1	10168	r		218	mosquito (Aedes albopictus)	chr2.107_6271743	chr2.107	6271743	A	T	standard	0.832	recommended
533635990	Affx-1250866828	AX-580253464	TCATGGGAATATAAAGTCCCAGAGAAGTTTATAGC[A/G]AAAAGATTAGAAAGTCATTTAAAATAATCCATAAA	R	2	1	2	1	10168	f		218	mosquito (Aedes albopictus)	chr2.97_6086343	chr2.97	6086343	G	A	standard	0.832	recommended
533292316	Affx-1250699714	AX-579910436	ACACTTCTAGTATTCCACTATGACAACTATCAAAA[G/T]TCTTTCGCAAACTATTACAAATGTATTCATCATGA	K	2	1	2	1	10168	f		218	mosquito (Aedes albopictus)	chr2.82_636062	chr2.82	636062	T	G	standard	0.832	recommended
535986936	Affx-1249002022	AX-582554417	ATAATCTGTTATAAATAACCATCGACCATCCAAAT[A/G]CCCATAGAAGAGATCCCCCCGCACCAGAAGCCTCC	R	2	1	2	1	10168	f		218	mosquito (Aedes albopictus)	chr2.17_34919332	chr2.17	34919332	A	G	standard	0.832	recommended
533086316	Affx-1250595677	AX-579704565	CTGATATGAAGATGTAACGAAATATGAGTGGATTA[A/T]CTATCTTACCATTTCATCGAAGTGATACTTCACGT	W	4	1	2	1	10168	r		218	mosquito (Aedes albopictus)	chr2.48_4643010	chr2.48	4643010	T	A	standard	0.832	recommended
538875109	Affx-1250404475	AX-585428342	AAAACATTAAATAGAAGCTAAAGAGTTGCATGGTG[C/T]ACTGTTTTGCCCTAGAATATCTCTTTTCTATGTTA	Y	2	1	2	1	10168	r		218	mosquito (Aedes albopictus)	chr2.196_11293177	chr2.196	11293177	T	C	standard	0.832	recommended
535127172	Affx-1251415690	AX-581713050	TAGCCGGATACCAGAGGTTTCCTCTGATCATTCTG[A/G]TTTACTCCAGAGTTGAAGTCAAGCTCGTCTTCCTG	R	2	1	2	1	10168	r		218	mosquito (Aedes albopictus)	chr3.29_1831478	chr3.29	1831478	A	G	standard	0.832	recommended
533963233	Affx-1250992750	AX-580575453	TAAACTACGTATATTTATGGTAGCTAACAGCTTAA[A/G]GTTCAAATAATTCATCGTACCTATTGCTTCATTCC	R	2	1	2	1	10168	r		218	mosquito (Aedes albopictus)	chr3.122_1082789	chr3.122	1082789	G	A	standard	0.832	recommended
537908109	Affx-1249962134	AX-584469257	ACATGTCTCAAACTTGTGCATGATTTTCAGACTGG[A/T]ATTGTGTCAAGAAAATTGGGATTTGTAGTTGTCAC	W	4	1	2	1	10168	r		218	mosquito (Aedes albopictus)	chr2.122_2350858	chr2.122	2350858	A	T	standard	0.832	recommended
538332784	Affx-1250377173	AX-584892516	ATGTGGCGCACTATTCGGACTGGATTTACAATAAG[A/G]TAAAACAATACGAGTAAAGTAACGGCACGATTTGT	R	2	1	2	1	10168	f		218	mosquito (Aedes albopictus)	chr2.196_517643	chr2.196	517643	G	A	standard	0.832	recommended
535561422	Affx-1248840872	AX-582141399	CCCGCTAAAAAGCTCATTATGGGCCGAAAGATCAA[G/T]TTAATTAAACCCTGAAATTGCGTGATTACGAGTTA	K	2	1	2	1	10168	f		218	mosquito (Aedes albopictus)	chr3.66_2727956	chr3.66	2727956	T	G	standard	0.832	recommended
536873973	Affx-1249444913	AX-583439036	CTGGTGGTGGTTTACGCTAAGCTCAAGTCGGATTT[C/T]GCATTTTCCTAGAAATGAAAAACCGTGACTGTTGA	Y	2	1	2	1	10168	r		218	mosquito (Aedes albopictus)	chr1.147_6280306	chr1.147	6280306	C	T	standard	0.832	recommended
533206005	Affx-1250655349	AX-579824169	AAACTTTCTATATTGAATATAACGGTTAACTTTAT[G/T]TTACGAAATTCCTGTTTTACTACTGTATTTAGCAT	K	2	1	2	1	10168	r		218	mosquito (Aedes albopictus)	chr2.61_1624456	chr2.61	1624456	T	G	standard	0.832	recommended
536578346	Affx-1249297127	AX-583144309	ACTTACTACTAGCGTCGTTCAATGTTCAGAACAGT[A/T]ATTGTAAAATTGACAACTACTCCAAATACCTTGTG	W	4	1	2	1	10168	r		218	mosquito (Aedes albopictus)	chr1.113_3244945	chr1.113	3244945	T	A	standard	0.832	recommended
536718899	Affx-1249367423	AX-583284324	GGAATCGCGACTGTTTCCCGTAAATTTCCCCATAA[A/G]ATTCGTCGCTCGGTCCCTAATCTAATTAGTGCGAT	R	2	1	2	1	10168	r		218	mosquito (Aedes albopictus)	chr1.133_1784241	chr1.133	1784241	A	G	standard	0.832	recommended
537245013	Affx-1249632188	AX-583808715	TTATATTTTGTGTATGTTAAATAACATTTTACCGA[A/G]TAAATCCACCAAGTCTCAGGAAAATCCTGGGACAT	R	2	1	2	1	10168	f		218	mosquito (Aedes albopictus)	chr1.54_2189667	chr1.54	2189667	A	G	standard	0.832	recommended
535061552	Affx-1251390493	AX-581648082	AGCTCAATGAGCTGAGTCAGTTTGAAAACTAAAGT[C/T]ACAGTAAAAATCACTAAACCAACTGCTTTGAAGAT	Y	2	1	2	1	10168	f		218	mosquito (Aedes albopictus)	chr3.27_2067352	chr3.27	2067352	T	C	standard	0.832	recommended
535500131	Affx-1248822718	AX-582081507	ATTGTTTTACAATGCTATGTGAAGTTTACGAGTTT[C/T]TTTTACTAGCTGCATTCCAAGTCAACTTTTTTTTC	Y	2	1	2	1	10168	r		218	mosquito (Aedes albopictus)	chr3.61_1190259	chr3.61	1190259	C	T	standard	0.832	recommended
538240315	Affx-1250284687	AX-584800300	AGCAAAACTTATTTCGAAATCGTAACAACAATATC[A/T]TAAAACATAAGGTACCGGTTCCTCAGCGTGTACGT	W	4	1	2	1	10168	f		218	mosquito (Aedes albopictus)	chr2.186_12338558	chr2.186	12338558	T	A	standard	0.832	recommended
538349841	Affx-1250394234	AX-584909527	CCTTTCGTATCACAATCCAAGCCTGTATTAGAAAT[A/G]TAGAAATGCTCCCAACAAAAACAGTTCCAATTGAA	R	2	1	2	1	10170	f		218	mosquito (Aedes albopictus)	chr2.196_8066930	chr2.196	8066930	G	A	standard	0.83	recommended
534997861	Affx-1251364767	AX-581584848	ATTAAAGAAACAAACGTCGTGTGTACATATCTAAA[G/T]CAAACATCCGTCCGGGCCGGGCGCGGTCAGTCCAC	K	2	1	2	1	10170	f		218	mosquito (Aedes albopictus)	chr3.20_6900398	chr3.20	6900398	G	T	standard	0.83	recommended
533655492	Affx-1250872463	AX-580272696	ATATTTATTATTTCAGTTGCAAAGGCTTCGTTTAG[A/G]TTCCGAGTGTTGACTATAGTTTTCTCTAACGTACG	R	2	1	2	1	10170	r		218	mosquito (Aedes albopictus)	chr2.97_9227350	chr2.97	9227350	A	G	standard	0.83	recommended
534028920	Affx-1251025721	AX-580641019	GCCTTTACTATTAAGCTGTGATCAACTCTAGTTTT[C/T]CATTTGACCTACATAGCTTTAACGCTAGTTTGTTA	Y	2	1	2	1	10170	r		218	mosquito (Aedes albopictus)	chr3.136_2622759	chr3.136	2622759	C	T	standard	0.83	recommended
538397486	Affx-1250441893	AX-584956998	GCAACTAATGTGTTTTCCATTGGAAAGGATTAGCA[A/G]CGATATGGTGGATGAGGGGGGTCAGCTGGGAGAAG	R	2	1	2	1	10170	f		218	mosquito (Aedes albopictus)	chr2.205_2484483	chr2.205	2484483	G	A	standard	0.83	recommended
533685521	Affx-1250883233	AX-580302298	TGTCCAGCTGCAATCGATCACAATAAAAGTATCCG[A/T]TCAGTAACACAAATTGCTCGATTCGAAGATAAGGA	W	4	1	2	1	10170	r		218	mosquito (Aedes albopictus)	chr2.97_13038244	chr2.97	13038244	T	A	standard	0.83	recommended
536193087	Affx-1249105197	AX-582760138	CCCGAAAGCAGAATGATTGATTGAAAAACTTGTAA[A/T]TAGAAGGCACGAAATGTTGCTAATTGACAAATTGA	W	4	1	2	1	10170	f		218	mosquito (Aedes albopictus)	chr3.75_16520205	chr3.75	16520205	T	A	standard	0.83	recommended
533189324	Affx-1250648114	AX-579807491	TACAACATAAAACTTCGAATGATACGAGTGAAGAG[A/T]AAACAGTAAACGGTGCCTTTTATCGACCTTGTAAA	W	4	1	2	1	10170	f		218	mosquito (Aedes albopictus)	chr2.60_15853825	chr2.60	15853825	A	T	standard	0.83	recommended
534026342	Affx-1251024421	AX-580638443	TTCATGCATATTCTTTCTAGGCTTACAGAATCTAC[A/T]TCTCAAACAACTTACTAGGGTTAACTATCTTCCAC	W	4	1	2	1	10170	r		218	mosquito (Aedes albopictus)	chr3.136_2171423	chr3.136	2171423	T	A	standard	0.83	recommended
536299871	Affx-1249158836	AX-582866710	TCGGAAGCTGATGCCGTCCAACGTCACGTTTCAAA[A/G]CTGTCGTACCTCGCTCCTCACATCGTTTGCGTGGC	R	2	1	2	1	10170	f		218	mosquito (Aedes albopictus)	chr3.77_14887841	chr3.77	14887841	G	A	standard	0.83	recommended
536313587	Affx-1249165617	AX-582880402	CTGATGAGATAGTTATCACAGTCAAGTTGGTAAAA[A/C]CACAAAACAAAAAAAAACTTTCTAGTGCTTCGAAA	M	2	1	2	1	10170	f		218	mosquito (Aedes albopictus)	chr3.77_17343802	chr3.77	17343802	A	C	standard	0.83	recommended
534824254	Affx-1251298111	AX-581413204	AAATAAATATTTGTTGTTTACCAACAACTGAGAAG[A/T]ACATTTTGTTTGTGGGACAAACACAATTGCCGGCA	W	4	1	2	1	10170	f		218	mosquito (Aedes albopictus)	chr3.180_1438785	chr3.180	1438785	A	T	standard	0.83	recommended
537923764	Affx-1249969974	AX-584484852	GTTGAAACTTTGTGGTTTGTTTGAATATATAGTTC[A/T]TTGATAATTTCGATTGAGTTTCAATTTGATTTCGA	W	4	1	2	1	10170	r		218	mosquito (Aedes albopictus)	chr2.122_5844494	chr2.122	5844494	T	A	standard	0.83	recommended
535682317	Affx-1248880450	AX-582260039	AATCATCGGTCAGTTTTTATGACAAGAACATAAGC[A/G]TAAACACACATACAAATGATTAGGACAATTTAAAA	R	2	1	2	1	10170	f		218	mosquito (Aedes albopictus)	chr3.7_3110755	chr3.7	3110755	A	G	standard	0.83	recommended
536095156	Affx-1249055742	AX-582662402	TTGTTCATTCACATATGACTCGGTTTCTGAAATTT[C/T]TGTCACGATTCTTCACGGCAGTTTATAGCAGGAAT	Y	2	1	2	1	10170	r		218	mosquito (Aedes albopictus)	chr3.74_5705462	chr3.74	5705462	C	T	standard	0.83	recommended
533149410	Affx-1250627159	AX-579767600	ACGCTCAAGCTGTACGGAATCGAGTAGTACGAGAT[C/T]TTCTAGATTGACGTCGTCAGTAAGTACATTGTATG	Y	2	1	2	1	10170	r		218	mosquito (Aedes albopictus)	chr2.60_6296240	chr2.60	6296240	T	C	standard	0.83	recommended
535457607	Affx-1248807363	AX-582039483	GTTGACATATTATTTGAAAAACAATGTATATTCCG[A/T]TAAGTTCCTCGACCTCATTAGGATTAAAACCCAAT	W	4	1	2	1	10170	r		218	mosquito (Aedes albopictus)	chr3.58_1541064	chr3.58	1541064	A	T	standard	0.83	recommended
534026556	Affx-1251024527	AX-580638657	ACTTCCGATACCTCTCCGACGGCCCGTCATAATAT[G/T]TGCTATTTGTGTCTGATTGGGAAGTGCTCTTGTCT	K	2	1	2	1	10170	r		218	mosquito (Aedes albopictus)	chr3.136_2219070	chr3.136	2219070	G	T	standard	0.83	recommended
533501058	Affx-1250802814	AX-580119010	TATAACCCGTCTTCCTCAGCATAATAGTCGTTTAG[A/T]TTCTGATAGAAAACGTTCACTAAAATTTCTTATTA	W	4	1	2	1	10170	r		218	mosquito (Aedes albopictus)	chr2.87_21560038	chr2.87	21560038	T	A	standard	0.83	recommended
537308490	Affx-1249663938	AX-583871804	CTTCAATATCCTTCTGAATTTACCTCTCCAACATC[A/G]AAATGCTTAGGTTTGATCTTCATGATGGTGATTCC	R	2	1	2	1	10170	f		218	mosquito (Aedes albopictus)	chr1.7_2228479	chr1.7	2228479	G	A	standard	0.83	recommended
536259350	Affx-1249138467	AX-582826245	TTACATAAACTCATGTGATTAGATGATGAAGCATA[A/T]TTTCAATTTCCGGTAGAAACGATTGTAAAATCATT	W	4	1	2	1	10170	f		218	mosquito (Aedes albopictus)	chr3.77_6244257	chr3.77	6244257	T	A	standard	0.83	recommended
537102509	Affx-1249558896	AX-583666773	ACCGCGTGAAACTCTCAGCCAAGCACACTCTCACT[C/T]GTCTACTTTATCGTCCGTACAATCAATAAAAATTA	Y	2	1	2	1	10170	r		218	mosquito (Aedes albopictus)	chr1.35_98199	chr1.35	98199	C	T	standard	0.83	recommended
536674755	Affx-1249345387	AX-583240310	TGGATTGTTTTGTTTTGCTTGTATGTGGAATTCAT[A/T]ACTGTCAAACGAGTTCTCAGCTAGAAAGTTTGGTG	W	4	1	2	1	10170	r		218	mosquito (Aedes albopictus)	chr1.131_1088538	chr1.131	1088538	T	A	standard	0.83	recommended
533130131	Affx-1250618464	AX-579748356	TTTTTTAATTATTTTCAGATCGTGTTCTGTTAAAA[A/G]TCATAATAAAGTTAAGATGCTCAATTATTCAATTC	R	2	1	2	1	10170	f		218	mosquito (Aedes albopictus)	chr2.57_3427505	chr2.57	3427505	G	A	standard	0.83	recommended
535558694	Affx-1248839996	AX-582138724	GAATGAGTCTTCTGAAAAGAATAAAGATTGATTGA[A/T]TAATTTGTCTTTATTATAGAGACTTTCAGCTCTTG	W	4	1	2	1	10170	f		218	mosquito (Aedes albopictus)	chr3.66_1792976	chr3.66	1792976	A	T	standard	0.83	recommended
533976122	Affx-1250999212	AX-580588334	TATTACAAACGCAAATTTTCGACACATCACTTATG[C/T]TGTTCCACTATGTACCAGGATAAGGTTTCCATCAG	Y	2	1	2	1	10170	r		218	mosquito (Aedes albopictus)	chr3.122_4219843	chr3.122	4219843	C	T	standard	0.83	recommended
533993746	Affx-1251008075	AX-580605935	TGGCCGGTGCCCTTCTGGGCATTCTCCTGATCATT[C/T]TGTTACTGATGTCGATTCAGCCGCGGGAAACGGCT	Y	2	1	2	1	10170	r		218	mosquito (Aedes albopictus)	chr3.124_362099	chr3.124	362099	C	T	standard	0.83	recommended
535822529	Affx-1248931578	AX-582394982	TTTTTCGTTCTAATGTTTAAAAAGGTGATGCATAG[A/G]AAATGTATGTACAGTAAAGTACTTGGTAGAGTATA	R	2	1	2	1	10170	f		218	mosquito (Aedes albopictus)	chr3.74_1986789	chr3.74	1986789	G	A	standard	0.83	recommended
533069219	Affx-1250587951	AX-579687481	TCTTAGTTTAATTTACATGAACAGTAAAACATAAG[A/G]TAAATAAACGGTATTTATACATAGGAAGACCACAC	R	2	1	2	1	10170	f		218	mosquito (Aedes albopictus)	chr2.48_450690	chr2.48	450690	G	A	standard	0.83	recommended
537706876	Affx-1249862638	AX-584268684	GTTTTAAACATAGGTTAGCTCTATAAAATTAGTCA[A/T]ATAAGTTTTATCGTATTATCTACGCAGAACAGAAC	W	4	1	2	1	10170	f		218	mosquito (Aedes albopictus)	chr1.92_806062	chr1.92	806062	T	A	standard	0.83	recommended
538768896	Affx-1250298240	AX-585322463	ACGCTTGAGTGCTACTCTTTTTGCTACGTCGTTTC[C/G]AGATTCAATGAAGAGGTAGGAAAGAATGTCAGAAT	S	4	1	2	1	10172	r		218	mosquito (Aedes albopictus)	chr2.186_16578254	chr2.186	16578254	G	C	standard	0.828	recommended
535865441	Affx-1248948682	AX-582437182	GGCTCGCGTAGTAGGCTAAGTCAATCATATAGTAA[C/T]CATAGAAGTAGCGGAAACCATTATGTCAATCATAT	Y	2	1	2	1	10172	f		218	mosquito (Aedes albopictus)	chr2.17_13095308	chr2.17	13095308	C	T	standard	0.828	recommended
534197372	Affx-1251090095	AX-580803291	ACCAGATGCTCTACTGAAATATGGTGAACATTCCT[G/T]TTGCCTCTTAAATCTCATGTTAGACCTTTTTAACT	K	2	1	2	1	10172	r		218	mosquito (Aedes albopictus)	chr3.146_1151190	chr3.146	1151190	T	G	standard	0.828	recommended
536454037	Affx-1249235035	AX-583020389	CTCGACTGCGCGACTTGATAGCATATCTTTTTTAT[G/T]TTTCTGGTTCACATTTTATGGGCCAATCTTAATTC	K	2	1	2	1	10172	r		218	mosquito (Aedes albopictus)	chr3.95_3613501	chr3.95	3613501	T	G	standard	0.828	recommended
536460848	Affx-1249239343	AX-583027196	GTCAAGGTCAAAGCAAGAGCTTGTAGCTTACATAG[A/T]TCACAACGTTTGCAAAAATCAAGACATTTGTAGAG	W	4	1	2	1	10172	f		218	mosquito (Aedes albopictus)	chr3.95_4425788	chr3.95	4425788	T	A	standard	0.828	recommended
537132530	Affx-1249575781	AX-583696691	ATCTATTTTTGAAAAATCAAGACAGAGCAAAAGAA[A/T]TCCTTTTGATGAAGTACCAATGAGAGTACCTACAT	W	4	1	2	1	10172	f		218	mosquito (Aedes albopictus)	chr1.36_7305066	chr1.36	7305066	T	A	standard	0.828	recommended
538747802	Affx-1250277145	AX-585301393	CTTGCCTACAGTTAGACGAATTTCGCGTCGATTCA[C/T]TTTACCTGCTATCAGAATGCTAAGGAATATAGGTG	Y	2	1	2	1	10172	r		218	mosquito (Aedes albopictus)	chr2.186_9903036	chr2.186	9903036	T	C	standard	0.828	recommended
535394263	Affx-1251511584	AX-581977104	TCCAGAAGTTCTATAATGATTTTTTTTTTCAGAAG[A/T]TTCATGATGAGTTACTCCGTAAAATTTTCAGGAAT	W	4	1	2	1	10172	r		218	mosquito (Aedes albopictus)	chr3.49_7049833	chr3.49	7049833	T	A	standard	0.828	recommended
535004308	Affx-1251367783	AX-581591256	ACAAGCAAAATATTGGAGTTAAATTTGTTTTGAAA[A/G]TGTTTTAAAGACCATCACGAAACCTAAATTAATTT	R	2	1	2	1	10172	r		218	mosquito (Aedes albopictus)	chr3.20_8108668	chr3.20	8108668	A	G	standard	0.828	recommended
536593340	Affx-1249305700	AX-583159210	TTAGATGTACACATTCCTTTCCTATGTATAACACT[C/G]AACTAACTTTCACTCCGTGCAATCTCCCTCCTTAT	S	4	1	2	1	10172	f		218	mosquito (Aedes albopictus)	chr1.116_587809	chr1.116	587809	G	C	standard	0.828	recommended
538722628	Affx-1250251968	AX-585276271	GTAAAACAGCTAACATGAAACCGGCAATTAAGTTT[G/T]CATTTATCTTGCTTGAGCATGCATGTGCACTTGTG	K	2	1	2	1	10172	r		218	mosquito (Aedes albopictus)	chr2.186_409427	chr2.186	409427	G	T	standard	0.828	recommended
535391098	Affx-1251510440	AX-581973965	AATTTGCTGGATACAAAGGAACTAGTGACCAACGG[A/T]TTCGCAAGTTCAGACCAGAAGAATAACAATCAGCA	W	4	1	2	1	10172	r		218	mosquito (Aedes albopictus)	chr3.49_6810579	chr3.49	6810579	T	A	standard	0.828	recommended
537805838	Affx-1249912160	AX-584367327	AGAGAGAGAATATAGTGTGTAATTAAACCGGCATA[G/T]AGCTGCCGGAGGAAACCCACAAAATATCGCAGAAA	K	2	1	2	1	10172	f		218	mosquito (Aedes albopictus)	chr2.103_7877428	chr2.103	7877428	G	T	standard	0.828	recommended
538882230	Affx-1250411597	AX-585435428	GAATAGCGTGGCATACAAATGGAGCGCGAAATATA[A/G]CTCTATAGTTTCCAATTCATTCTAAAAACATCACA	R	2	1	2	1	10172	r		218	mosquito (Aedes albopictus)	chr2.196_14635296	chr2.196	14635296	A	G	standard	0.828	recommended
537343003	Affx-1249679099	AX-583906161	AATTTTTCCAGTGATTTCGTACATTCCCAAAATTT[C/T]CTTTAGTTAGTAGCGCTGGCGCCATATTATATTTT	Y	2	1	2	1	10172	r		218	mosquito (Aedes albopictus)	chr1.7_9352429	chr1.7	9352429	C	T	standard	0.828	recommended
534724164	Affx-1251263618	AX-581314536	GTGACAATCGATGATGAGGCTATATGCATATGTAA[A/G]TATGTCCAATCAAGTAGGCATATCATACTCAAACC	R	2	1	2	1	10172	f		218	mosquito (Aedes albopictus)	chr3.170_14422465	chr3.170	14422465	G	A	standard	0.828	recommended
534892359	Affx-1251323138	AX-581480028	TGCTCCGCCGTCTCTTGTGGGTGGGTTTGAGCTTT[A/G]TGCATTTCTAGGTAGCTGTAGTTCGCGAATTCGGC	R	2	1	2	1	10172	r		218	mosquito (Aedes albopictus)	chr3.180_10082990	chr3.180	10082990	G	A	standard	0.828	recommended
535069572	Affx-1251394933	AX-581656088	TGCTGTAAATATTTCGACCTGCGATTACGATTTTC[A/T]CTTCTGTGACTACAAACAAAGATTACAGCTGTGTC	W	4	1	2	1	10172	r		218	mosquito (Aedes albopictus)	chr3.27_3776029	chr3.27	3776029	A	T	standard	0.828	recommended
535071652	Affx-1251395945	AX-581658150	GTATGTGGATTCAATTGGGATGAATTTTGTGGTTG[C/T]TGATGAGTAATGATTGTGTTTGGATGATCCCGGAA	Y	2	1	2	1	10172	r		218	mosquito (Aedes albopictus)	chr3.27_4199476	chr3.27	4199476	C	T	standard	0.828	recommended
533435828	Affx-1250771420	AX-580053835	AATAGAACAATAATTAGCATACGTGAAACGAATCG[A/G]CAATTTATGTATTCCACTCACTTTCATCATGGTGG	R	2	1	2	1	10172	f		218	mosquito (Aedes albopictus)	chr2.87_8804576	chr2.87	8804576	A	G	standard	0.828	recommended
534125261	Affx-1251072120	AX-580736753	CCTTCCAACCAGTCGATAAAAGCATAGAGCATAAA[A/C]ATATTTTAAATCTACCATACCCGTATTATCACAGC	M	2	1	2	1	10172	f		218	mosquito (Aedes albopictus)	chr3.145_4443844	chr3.145	4443844	A	C	standard	0.828	recommended
535715010	Affx-1248891496	AX-582292288	TGACAAAATGACTACCACTAGTGAAAGGAACACTA[A/T]GAATAAAATGCCTTCCTATTTTGAGTAATAGGTTA	W	4	1	2	1	10172	r		218	mosquito (Aedes albopictus)	chr3.7_7208269	chr3.7	7208269	A	T	standard	0.828	recommended
536338212	Affx-1249178075	AX-582904946	TTTATTCTGTCGTAAGTTATAAGACGAAAAGATAG[A/G]ACAAAATAGGAAAGGGTTAGGTAGAGAGGAGGCAT	R	2	1	2	1	10172	f		218	mosquito (Aedes albopictus)	chr3.78_2600061	chr3.78	2600061	A	G	standard	0.828	recommended
533299947	Affx-1250702197	AX-579918051	CGATCGCGCGCGCGCCCGCGAAAATCACATTATAC[A/G]TTGCACAATCGTTATCAGGAAAAGATCACCGCCTC	R	2	1	2	1	10172	r		218	mosquito (Aedes albopictus)	chr2.82_2588495	chr2.82	2588495	A	G	standard	0.828	recommended
534784985	Affx-1251286114	AX-581374478	TGGTGATGCCGGAACCATCGTCGCCGCTTGGCTCA[A/T]TTGATACCACATTAACAGAAGTAACTGAGACACAA	W	4	1	2	1	10172	r		218	mosquito (Aedes albopictus)	chr3.178_614357	chr3.178	614357	A	T	standard	0.828	recommended
538874675	Affx-1250404041	AX-585427908	ATCCAGACAGCTTTTTGCACACCTGGGTTTATTGT[C/T]TTCAGCTTTGCGCCAGTAATTAATGTTCTTTGGGA	Y	2	1	2	1	10172	r		218	mosquito (Aedes albopictus)	chr2.196_11094480	chr2.196	11094480	C	T	standard	0.828	recommended
536570614	Affx-1249294332	AX-583136596	CATAGTGATATGATTTCGACTTTAATGTACTATAA[A/C]ATATTTTATATTAAAGTTGAAATTACTTGTTAAGT	M	2	1	2	1	10172	f		218	mosquito (Aedes albopictus)	chr1.113_2079516	chr1.113	2079516	A	C	standard	0.828	recommended
532884509	Affx-1250495592	AX-579502836	ATGCGTGTGGACTTGGATAAACCATAGAAAGTATA[G/T]AAAATTTAGTATAATTAGTTATGACCTATGTCGTA	K	2	1	2	1	10172	f		218	mosquito (Aedes albopictus)	chr2.22_11784401	chr2.22	11784401	T	G	standard	0.828	recommended
535523996	Affx-1248830059	AX-582104749	TTGTGAATGCCACTACTATGAGGATTAAAAATGAT[A/C]GTTTATAGAGTGATCGGTAGAAACGTTGTTAGTTT	M	2	1	2	1	10172	r		218	mosquito (Aedes albopictus)	chr3.64_109843	chr3.64	109843	C	A	standard	0.828	recommended
532883782	Affx-1250495231	AX-579502108	GGGCATTTAATCGAGGATGCATTTGTGAAATGCAA[C/T]TCCCCAGATTCAGATGCCCAATGGTTTCTTCCAGT	Y	2	1	2	1	10172	f		218	mosquito (Aedes albopictus)	chr2.22_11588701	chr2.22	11588701	C	T	standard	0.828	recommended
534550681	Affx-1251211435	AX-581146442	GTGTTTCTCTGGGTGGTGAAATTGGAAGTAAATTT[C/T]AGATTAAATTGGTTGGAGATATAAGTCTAGGAAGG	Y	2	1	2	1	10172	r		218	mosquito (Aedes albopictus)	chr3.168_1928837	chr3.168	1928837	T	C	standard	0.828	recommended
536579881	Affx-1249297889	AX-583145844	GATTTCGACGGAGGTGGTGGAGGTGCTTGGTCTTT[C/T]GTTTCCAATTTTGTATCGGATTTCCGTTTCGGCGG	Y	2	1	2	1	10172	r		218	mosquito (Aedes albopictus)	chr1.113_3520224	chr1.113	3520224	T	C	standard	0.828	recommended
533062443	Affx-1250583814	AX-579680707	TCTTTGAAGAAAAATTGCGTGTTTTTGAATGATGA[A/T]TAGATTTGTTTAGACTTAATAATCGGTTGGGCCAA	W	4	1	2	1	10172	r		218	mosquito (Aedes albopictus)	chr2.42_13567632	chr2.42	13567632	A	T	standard	0.828	recommended
535455837	Affx-1248806085	AX-582037725	GACTATCGAGACGCGATGCATCACTTCTCGACAAT[A/G]ACAAGACTCCCCTGGATATTCATGTAGGCTGCTAA	R	2	1	2	1	10172	f		218	mosquito (Aedes albopictus)	chr3.58_770739	chr3.58	770739	G	A	standard	0.828	recommended
536098124	Affx-1249057762	AX-582665366	GCTGAAGTGATATGATATCTCTGTAACGAAATGCA[A/G]TAAACGCTCAACGTGGCCAACGCCGGGCAACAACA	R	2	1	2	1	10174	f		218	mosquito (Aedes albopictus)	chr3.74_6324914	chr3.74	6324914	A	G	standard	0.826	recommended
538599193	Affx-1250128514	AX-585153215	GGACACTGTTCCTAATTCAAAGGACGCTCTTTGAG[A/G]TTTAGATCTCATGCCGACAGTGACGGTAGGGAGCT	R	2	1	2	1	10174	r		218	mosquito (Aedes albopictus)	chr2.163_4631120	chr2.163	4631120	G	A	standard	0.826	recommended
533752313	Affx-1250911178	AX-580367931	GGTGCATGTGTGGATGCGGGATGATTGAGATGGAG[A/T]TTATGCTATTGGTCAATAAAGTCTACTTGCTCAAG	W	4	1	2	1	10174	r		218	mosquito (Aedes albopictus)	chr3.1_9174598	chr3.1	9174598	A	T	standard	0.826	recommended
536526984	Affx-1249271451	AX-583093096	AAAAATATTTATTCAACATTTACTAGGTATATTTG[A/C]ACTTTTAACTTTGTCTATTAAAGACGTCCCCAGTT	M	2	1	2	1	10174	r		218	mosquito (Aedes albopictus)	chr1.102_2126065	chr1.102	2126065	C	A	standard	0.826	recommended
537266384	Affx-1249640700	AX-583829960	ATCAATCTCGTTATACTGAAATCGCTTTCGCATAT[C/T]TTTACACAACTGGATCAAAAAGTTAATAAAAAATA	Y	2	1	2	1	10174	r		218	mosquito (Aedes albopictus)	chr1.64_1432689	chr1.64	1432689	C	T	standard	0.826	recommended
537442120	Affx-1249728720	AX-584004746	ACGAGTACCTTACCTATATAACGTAGACTAGTTGT[A/G]TCATTATTTTTACCCTCTGCATGCTGAAATTCTGC	R	2	1	2	1	10174	r		218	mosquito (Aedes albopictus)	chr1.85_6902189	chr1.85	6902189	G	A	standard	0.826	recommended
538858754	Affx-1250388115	AX-585412030	GAATGGAAATATGCTATACTCATTGCTTGGATCTA[A/T]TTATCAGTTTCCTAATCAGCTACTAGCATGTTAAA	W	4	1	2	1	10174	r		218	mosquito (Aedes albopictus)	chr2.196_4027934	chr2.196	4027934	A	T	standard	0.826	recommended
535781560	Affx-1248914868	AX-582354687	CTATACCTACGATCTTCACTATTATTTAGACTATA[A/C]TAAGGCGACCAGATCACGACTGTTGATCTGCCGTA	M	2	1	2	1	10174	f		218	mosquito (Aedes albopictus)	chr3.72_2368910	chr3.72	2368910	C	A	standard	0.826	recommended
533482854	Affx-1250793599	AX-580100815	CATCGTCCAGGTTCGATTTATTTGTGATGTCACAC[C/T]TTATCGATACAATCTGCGCCGTTGTATTGCAAGCA	Y	2	1	2	1	10174	r		218	mosquito (Aedes albopictus)	chr2.87_18064617	chr2.87	18064617	T	C	standard	0.826	recommended
533706840	Affx-1250891554	AX-580323183	TGTAGTACAGTTCTCGTGTGAAAATTGAAGAAGAA[A/T]CATAAAGGGCCGTGTAATATGATTTTAGGTTGGAA	W	4	1	2	1	10174	f		218	mosquito (Aedes albopictus)	chr3.1_1087110	chr3.1	1087110	A	T	standard	0.826	recommended
532905859	Affx-1250506273	AX-579524185	AGATCAATAACAGCGGCGCGGAGTACAATTTAAGA[A/T]TAGTAAATTAGAAATTTGTTATCCGAAAATTTTCT	W	4	1	2	1	10174	f		218	mosquito (Aedes albopictus)	chr2.27_1575785	chr2.27	1575785	T	A	standard	0.826	recommended
533657404	Affx-1250874208	AX-580274561	CAATAAATTCCATCACTACAACATTTCAGACATCA[C/T]AATCATGAACTTGAACCAAATCACCTCGAATTTAG	Y	2	1	2	1	10174	f		218	mosquito (Aedes albopictus)	chr2.97_9906739	chr2.97	9906739	T	C	standard	0.826	recommended
534912432	Affx-1251330584	AX-581499956	AAGCGTAAAATAGCAACCTCAAAACAACAGCAACA[A/G]CAGCAGGACGATAAAGGTGGGCTCAAAGTAGAAGC	R	2	1	2	1	10174	f		218	mosquito (Aedes albopictus)	chr3.189_283475	chr3.189	283475	A	G	standard	0.826	recommended
537776905	Affx-1249896517	AX-584338437	CATTTTGTAACATGATTATCTGAATTTTAGTTCTA[C/T]TTGCATCTCTATAAATGCCTCTTTTAAACGAGCGA	Y	2	1	2	1	10174	r		218	mosquito (Aedes albopictus)	chr2.103_3598997	chr2.103	3598997	T	C	standard	0.826	recommended
538144192	Affx-1250188556	AX-584704426	TTTAGAAAATGCGTATATTTTGTGTCAGAGAAGAA[A/C]TAAATAGAATAGAATGAACTCACACACACACTGAC	M	2	1	2	1	10174	f		218	mosquito (Aedes albopictus)	chr2.175_2638188	chr2.175	2638188	A	C	standard	0.826	recommended
535854950	Affx-1248944315	AX-582426835	GAAATGGTTCATAACTCAATTTACCAACTACAATC[A/C]AACTCGTTATCCATCGCATCGTTGTACCATTCTTC	M	2	1	2	1	10174	f		218	mosquito (Aedes albopictus)	chr2.17_11663065	chr2.17	11663065	C	A	standard	0.826	recommended
536839316	Affx-1249427668	AX-583404432	CGTTTATTAGAAGATTGCAATGATAAATGGCAGAA[C/T]TGAATGGGTTTGTTGGAATCTATCAAGAAAGTGAG	Y	2	1	2	1	10174	r		218	mosquito (Aedes albopictus)	chr1.144_12324578	chr1.144	12324578	T	C	standard	0.826	recommended
536350197	Affx-1249183002	AX-582916845	GAAATGAGGACAGCAATGAACAGGATCCTGCTTGA[A/G]TGTTCGATACGTGGTTACTGCAAACCTCATCGGAA	R	2	1	2	1	10174	r		218	mosquito (Aedes albopictus)	chr3.82_626782	chr3.82	626782	A	G	standard	0.826	recommended
533349775	Affx-1250727105	AX-579967845	TGTATATGGCGAAGAGCGTTTTAAATCCAATTTTT[C/T]GAATTGAAATACTCTACCGACAAAATATTCAGAAG	Y	2	1	2	1	10174	r		218	mosquito (Aedes albopictus)	chr2.82_15516271	chr2.82	15516271	C	T	standard	0.826	recommended
537008368	Affx-1249513556	AX-583573052	TCGTCAAAATTACCTTCAGTGCAATAATTTACAAA[A/G]CTAAAGCTTTCTGTCAGTTGGCCGAATAAATTGTA	R	2	1	2	1	10174	f		218	mosquito (Aedes albopictus)	chr1.170_2246299	chr1.170	2246299	A	G	standard	0.826	recommended
537164143	Affx-1249591658	AX-583728195	CTACTATTACTATCTTCACTACTACTAGAACTAAA[A/G]CTAATGCTGCTGCTGCTGTTTCTGATGTCACTGGA	R	2	1	2	1	10174	f		218	mosquito (Aedes albopictus)	chr1.41_7937839	chr1.41	7937839	G	A	standard	0.826	recommended
534264697	Affx-1251114363	AX-580868805	GTGGTCGTTGTCGTCATCCTTGTCCTCGCATGTGC[C/T]TTCTGAGTTGACTGAGGTCATCTCAAACTCAAGCG	Y	2	1	2	1	10174	r		218	mosquito (Aedes albopictus)	chr3.151_7500994	chr3.151	7500994	C	T	standard	0.826	recommended
536204215	Affx-1249110315	AX-582771247	TTTTGCATTTCATTAAGCAGAAGAATTTGGAACGT[A/C]ATTTCTGATACCATGTGTAGATATCAGGGAATCTT	M	2	1	2	1	10174	r		218	mosquito (Aedes albopictus)	chr3.75_17813951	chr3.75	17813951	C	A	standard	0.826	recommended
538566661	Affx-1250095970	AX-585120866	AAATATTCATTAATTTAGAAAATAAAATTATCTTT[C/T]AGTTTCTAAGTAAGTGTAGCAATGGAATTAGTGAG	Y	2	1	2	1	10174	r		218	mosquito (Aedes albopictus)	chr2.155_6125595	chr2.155	6125595	C	T	standard	0.826	recommended
538705745	Affx-1250235082	AX-585259466	AAATTTTAAACTTCTAATAAGTTTCTTTAACGTAA[C/T]TTTTGTTGATATGAAGAACGGAGACAGAATATATT	Y	2	1	2	1	10174	r		218	mosquito (Aedes albopictus)	chr2.179_4547533	chr2.179	4547533	C	T	standard	0.826	recommended
537386628	Affx-1249702907	AX-583949518	GGCAATGCCGTAATCATCAACAGTTCTACAGAAAT[A/C]ATGCGTCCTAAAAGTCGCGATCAAATCCACATTCT	M	2	1	2	1	10174	f		218	mosquito (Aedes albopictus)	chr1.74_1422728	chr1.74	1422728	C	A	standard	0.826	recommended
533408529	Affx-1250756419	AX-580026564	ACTCTAATCTGCAAAAGTTTTTGAAGATGAAATTT[C/T]CTTACCCACGGTTTTATAGATGTTAGTTTATAAAA	Y	2	1	2	1	10174	r		218	mosquito (Aedes albopictus)	chr2.87_3036373	chr2.87	3036373	C	T	standard	0.826	recommended
537493907	Affx-1249756579	AX-584056335	TCTGAATATCCATCAAAGGCATTGGTCTAAAAATG[C/T]AACTCAATTAGCAGCTGAAAGTCTCTCAAATAAAG	Y	2	1	2	1	10174	f		218	mosquito (Aedes albopictus)	chr1.85_20350516	chr1.85	20350516	C	T	standard	0.826	recommended
535493580	Affx-1248820058	AX-582075048	TTCCAAGACCTAAGAACGCACAAACCAATAGATAA[A/C]ATAAATTTTACAGACTTATTCCAATGAATCCACCG	M	2	1	2	1	10174	f		218	mosquito (Aedes albopictus)	chr3.61_561712	chr3.61	561712	A	C	standard	0.826	recommended
534934278	Affx-1251339794	AX-581521651	AGCTGCAGTTGTTCACGGTGCTGCAGGTAGCGTAT[G/T]GTTACAATATTATGCATATCGAATACGCTGTGTAC	K	2	1	2	1	10174	r		218	mosquito (Aedes albopictus)	chr3.191_753103	chr3.191	753103	T	G	standard	0.826	recommended
535281810	Affx-1251475269	AX-581866062	TCAATTCGCTAAGCGTTCTTTTTTGTCTAATTTTT[C/T]CTTACAGGTCCGTTTAATTGGCTACTGACATTTTG	Y	2	1	2	1	10174	r		218	mosquito (Aedes albopictus)	chr3.45_5743635	chr3.45	5743635	T	C	standard	0.826	recommended
537735525	Affx-1249875867	AX-584297200	TTCGATAAATGAGCTTAGGTGGAGGGATAAAAAAG[A/C]ATAAACTTTCACTTTTGCCGAATAATTTTCAAGAA	M	2	1	2	1	10174	r		218	mosquito (Aedes albopictus)	chr2.100_1827190	chr2.100	1827190	A	C	standard	0.826	recommended
533967035	Affx-1250995556	AX-580579255	AGGTGAATGTTAAACTTCGCTAGCGTGAGGTCAAT[A/G]GAGACGCGTGGCTGTTCGTCTCGTTTGTTGGTGTG	R	2	1	2	1	10174	f		218	mosquito (Aedes albopictus)	chr3.122_2104704	chr3.122	2104704	G	A	standard	0.826	recommended
535166547	Affx-1251429790	AX-581751948	AAATATAAATGACTATCCTTCTTACCGATAAGACT[A/T]ATCAGCGATGATACCCCAAAATCAACGGGGGTTTC	W	4	1	2	1	10174	f		218	mosquito (Aedes albopictus)	chr3.32_1169644	chr3.32	1169644	A	T	standard	0.826	recommended
537227002	Affx-1249621069	AX-583790779	ACCAAAATAATATATGACGCAAGTTTACAAACCAT[A/C]ATTGATTCATGTGCTAATATCTTTCACACCAGTAA	M	2	1	2	1	10174	r		218	mosquito (Aedes albopictus)	chr1.50_11512309	chr1.50	11512309	C	A	standard	0.826	recommended
532914367	Affx-1250509841	AX-579532692	TTTCACCAATTTCACAAATTTCACATATTTTTCAG[A/T]ATTACTTTTAAAGTACTTACATTTTCTCCTCGTCG	W	4	1	2	1	10174	r		218	mosquito (Aedes albopictus)	chr2.27_3586051	chr2.27	3586051	A	T	standard	0.826	recommended
538801736	Affx-1250331085	AX-585355210	TAGGTTGAGTTAACGATAACAATATTTATTATTTT[C/T]AGTTTCAATACTGTGTTCTTTCAATTCAACTCATT	Y	2	1	2	1	10174	r		218	mosquito (Aedes albopictus)	chr2.186_26901528	chr2.186	26901528	C	T	standard	0.826	recommended
533892043	Affx-1250965877	AX-580506713	ATATGTATATCTCTTTTAGCTCATATTCATCTAAC[A/G]AAAACTATTGAGGCGACAAGAGTGCACCTGTTCAA	R	2	1	2	1	10174	f		218	mosquito (Aedes albopictus)	chr3.116_6494036	chr3.116	6494036	G	A	standard	0.826	recommended
532910524	Affx-1250507950	AX-579528849	GAACTTGAAGGGTGCGCTGGAGGGTAACCGGGTTG[C/T]TTTGAGTGGTGATGATACAGTGATTCGTTAGACCC	Y	2	1	2	1	10174	r		218	mosquito (Aedes albopictus)	chr2.27_2082793	chr2.27	2082793	T	C	standard	0.826	recommended
534302300	Affx-1251130510	AX-580905504	TATATGAATTTGATTGACTTATAGCTCATAAAAAT[A/G]AAATGAAAATTATTCCCTTTGAAACGGTTACAACC	R	2	1	2	1	10174	f		218	mosquito (Aedes albopictus)	chr3.159_1432258	chr3.159	1432258	A	G	standard	0.826	recommended
536567262	Affx-1249292633	AX-583133248	TAAGAATTATGTATTCACCGAAGTAAACGCGATGA[A/T]TACACTTTTTTTCCTGAATGGGGCATTCTTCGGCC	W	4	1	2	1	10174	f		218	mosquito (Aedes albopictus)	chr1.113_1213982	chr1.113	1213982	A	T	standard	0.826	recommended
535820711	Affx-1248930609	AX-582393181	GGCCTTTCTGTTTTGTCTAAACAAACACATTTATG[C/T]CTATGTAAGGTTTATCTGCAGTAGGCCTGTCCACC	Y	2	1	2	1	10174	r		218	mosquito (Aedes albopictus)	chr3.74_1613565	chr3.74	1613565	T	C	standard	0.826	recommended
536189294	Affx-1249102881	AX-582756357	CCTGTCGTGGAATGATTGGATGTCAGTCTAAATTT[A/G]ATTGCTGCGTTAAGTAGCCACGACTGTAAATTGAA	R	2	1	2	1	10174	r		218	mosquito (Aedes albopictus)	chr3.75_15224809	chr3.75	15224809	G	A	standard	0.826	recommended
537896436	Affx-1249956253	AX-584457624	TCCGCCCGTCAATCAAGCTGATCTCAGCTGATCCG[C/T]TGTTATCCTTAACCTATCTTAACGCTTTGTTGTTA	Y	2	1	2	1	10174	r		218	mosquito (Aedes albopictus)	chr2.122_219186	chr2.122	219186	C	T	standard	0.826	recommended
536334598	Affx-1249176257	AX-582901345	GTAATTTTATATTGTAGAACTTCTTGTATAGTAAG[A/T]AAACGTCAGGAGAAAAGTGATTTGCTCTGATTTAT	W	4	1	2	1	10176	f		218	mosquito (Aedes albopictus)	chr3.78_1979131	chr3.78	1979131	T	A	standard	0.824	recommended
536540277	Affx-1249279123	AX-583106362	TTGTGAACTGCATTTCATTACTTCCACTTGATCTA[C/T]CCCCCACTACCGAAAAAAGGACGATGTGTTCTTTC	Y	2	1	2	1	10176	f		218	mosquito (Aedes albopictus)	chr1.106_1851272	chr1.106	1851272	T	C	standard	0.824	recommended
536187748	Affx-1249102111	AX-582754813	CTGTCCCTTCAAGCTGATTGCCTCCCCAAAGACCA[A/G]ATCTTGCATTCCGATCGGGTATGATTTCACACTGG	R	2	1	2	1	10176	r		218	mosquito (Aedes albopictus)	chr3.75_14964054	chr3.75	14964054	G	A	standard	0.824	recommended
534922476	Affx-1251334532	AX-581509922	GGTCAAATAAGATGTGACAAATAATCCAATTAAAA[A/G]TAATATTTCTTTCATTTGGATAAAAGATACATTAA	R	2	1	2	1	10176	f		218	mosquito (Aedes albopictus)	chr3.19_2134568	chr3.19	2134568	G	A	standard	0.824	recommended
535783877	Affx-1248915731	AX-582356968	CTAAGAGAACGAAATATTAAACACCGCTAAAACTT[C/T]GATTAGATAGTGATTGAAGTTGGTTCAAACAAAAT	Y	2	1	2	1	10176	r		218	mosquito (Aedes albopictus)	chr3.72_2586041	chr3.72	2586041	T	C	standard	0.824	recommended
533084737	Affx-1250594893	AX-579702986	ATTATTGAAAGTTTCTTACGAAGAATACTTTATTA[C/T]TTTCTATGCACTATGGTTTCTTCGTTTTGATTATT	Y	2	1	2	1	10176	r		218	mosquito (Aedes albopictus)	chr2.48_4479527	chr2.48	4479527	T	C	standard	0.824	recommended
537785243	Affx-1249900733	AX-584346763	TGTTCATCCTTTTTTGGTGTAAATTTCCGTTATTG[A/T]TTCAGTTCGTACGGTTTATGTCTTAAATTTCATGC	W	4	1	2	1	10176	r		218	mosquito (Aedes albopictus)	chr2.103_4847799	chr2.103	4847799	T	A	standard	0.824	recommended
533142988	Affx-1250624880	AX-579761182	TAAAAAACTCAGGACACGATTTACATAACAGCTAA[A/G]ATTAAAAAGGACATCGACCCCAAATTGCTTTGCCG	R	2	1	2	1	10176	f		218	mosquito (Aedes albopictus)	chr2.60_5102579	chr2.60	5102579	G	A	standard	0.824	recommended
538630768	Affx-1250160096	AX-585184693	ATAAACTACTTCGTTCATAATTTATAGACCCATTT[C/T]GATCTAGAATGTAAGCTTCTCCTATCTGTTAATTA	Y	2	1	2	1	10176	r		218	mosquito (Aedes albopictus)	chr2.17_1568889	chr2.17	1568889	C	T	standard	0.824	recommended
537756935	Affx-1249886550	AX-584318511	AAACTAAGCAAAAAAATCAATAATGGACCCCCATT[C/T]AGTTCCATTCGATGTCTTTTATATATATTTTGTGT	Y	2	1	2	1	10176	r		218	mosquito (Aedes albopictus)	chr2.103_859301	chr2.103	859301	T	C	standard	0.824	recommended
537332638	Affx-1249673885	AX-583895833	TTTTAGCCGATTTTAAGTAAACCAAGCATTTTGTA[A/T]TATACTAAAAGCCTTTCGAAGAAACAACACGTGTT	W	4	1	2	1	10176	r		218	mosquito (Aedes albopictus)	chr1.7_7087398	chr1.7	7087398	T	A	standard	0.824	recommended
535800908	Affx-1248922757	AX-582373733	ACTGATTGGTCTAATAAACATGGCTTCTTGGATTT[C/T]ACTTTGAATTTTCCCTTTATTCCAACGTGTCGCCC	Y	2	1	2	1	10176	r		218	mosquito (Aedes albopictus)	chr3.73_1882785	chr3.73	1882785	T	C	standard	0.824	recommended
536755741	Affx-1249385813	AX-583321088	CACACCGGATTGGATTGGATGTTTCTGCAGACATA[C/T]ATTTTGACCCGAATTGTCAAGCTACAGTACGGCAA	Y	2	1	2	1	10176	r		218	mosquito (Aedes albopictus)	chr1.139_6429070	chr1.139	6429070	T	C	standard	0.824	recommended
533721129	Affx-1250896442	AX-580337132	AAGGCATCGCTCTGCAGCACGTCGTGGCTATCGTA[A/G]TTTACGGCATGCATTCGTAAGATCTGTACCACGGC	R	2	1	2	1	10176	r		218	mosquito (Aedes albopictus)	chr3.1_3092337	chr3.1	3092337	G	A	standard	0.824	recommended
534605444	Affx-1251226999	AX-581200343	AAGGTATAGATTTTGAACAAAAAAAAACATCAAGA[A/T]TTGATCAGTTATAGGTTGGCTATGGGTATTATTGG	W	4	1	2	1	10176	r		218	mosquito (Aedes albopictus)	chr3.168_7861657	chr3.168	7861657	A	T	standard	0.824	recommended
533220318	Affx-1250663685	AX-579838478	CTGTCACTTAAATTAAGTGGTAGTTTCGTGGAATA[A/T]ACTCGATTATTTTCTACGTAATGTAGTATATTCAG	W	4	1	2	1	10176	f		218	mosquito (Aedes albopictus)	chr2.62_1423462	chr2.62	1423462	A	T	standard	0.824	recommended
537226787	Affx-1249620961	AX-583790564	ACCCTATTTTCTCCCTTGCTCAATCACGTCTTTTT[C/T]TTGTACATATCCCTAATGCTATTCCTAATATATGT	Y	2	1	2	1	10176	r		218	mosquito (Aedes albopictus)	chr1.50_11476989	chr1.50	11476989	C	T	standard	0.824	recommended
533901212	Affx-1250968871	AX-580515365	TGTAGATGACAGGTGGAAATGGAACTCTACTTTTA[C/T]TGTATGAGTATGGAAAACTTGAAGGATCATGTGTT	Y	2	1	2	1	10176	r		218	mosquito (Aedes albopictus)	chr3.116_8071134	chr3.116	8071134	C	T	standard	0.824	recommended
538221044	Affx-1250265415	AX-584781062	GTTCATTGAGAAACAACCACAATGTTATAGCAGAT[A/G]CTCGCTGAGCGAAGCTACTTTACCTAGATACGTGC	R	2	1	2	1	10176	f		218	mosquito (Aedes albopictus)	chr2.186_5182980	chr2.186	5182980	G	A	standard	0.824	recommended
538397556	Affx-1250441963	AX-584957068	GTTGTTCTGGTATTTATGGTATACAGATCTCAATC[A/G]AAAAGAAGAAAATACTGATAAATTTATTTTTTTTT	R	2	1	2	1	10176	f		218	mosquito (Aedes albopictus)	chr2.205_2517267	chr2.205	2517267	A	G	standard	0.824	recommended
536792228	Affx-1249405170	AX-583357495	TTCAGCTTCATTGTACGTCTATTATAATTTAAACA[A/C]CAATAATTTGCATAGATTTGCAGCTGAATATGAAG	M	2	1	2	1	10176	f		218	mosquito (Aedes albopictus)	chr1.142_620549	chr1.142	620549	A	C	standard	0.824	recommended
536948199	Affx-1249481963	AX-583513053	TCAAAAGTTCTTCAAACTCTTGTCCAATCGGTCGT[G/T]TTGACAGAATTTCATAGCCTGATTTGGCAACAATG	K	2	1	2	1	10176	r		218	mosquito (Aedes albopictus)	chr1.152_2641694	chr1.152	2641694	G	T	standard	0.824	recommended
537609040	Affx-1249812467	AX-584171168	TGTCTAATGCCGGCCAAGTGCCCATTCGTAACGTA[C/T]GATTAATTTAATGGCTACATGGACCAAAACTAAAT	Y	2	1	2	1	10176	r		218	mosquito (Aedes albopictus)	chr1.90_8831248	chr1.90	8831248	T	C	standard	0.824	recommended
534270713	Affx-1251116954	AX-580874641	ACAGCTTAATGAATGTGTTCTACCCATTATTGCCA[A/T]TCGATCGCTTATCCATTACCTCACATTAAAGTTTA	W	4	1	2	1	10176	r		218	mosquito (Aedes albopictus)	chr3.151_8545082	chr3.151	8545082	T	A	standard	0.824	recommended
533574837	Affx-1250840748	AX-580192715	GATGTAATTATTTAGTTCCCTCTCAGCTTCCATAT[A/G]ATAATATTCTTTTTGACTCACCGAATTACTCCTTG	R	2	1	2	1	10176	f		218	mosquito (Aedes albopictus)	chr2.95_1469719	chr2.95	1469719	A	G	standard	0.824	recommended
537230178	Affx-1249622643	AX-583793942	AATTAGGAAAGATTTTAAAGTGCATTCAGATATTT[C/T]CAATACATTTACTGTAATTATTTACATTAAACATT	Y	2	1	2	1	10176	r		218	mosquito (Aedes albopictus)	chr1.50_12401844	chr1.50	12401844	C	T	standard	0.824	recommended
537917290	Affx-1249966732	AX-584478398	AATTCTCTTTTATTTTTGGCTAGCTATATATCTTC[C/T]TCGCTGTTTTTAATAGCATTTGCGACTTACAGTTG	Y	2	1	2	1	10176	r		218	mosquito (Aedes albopictus)	chr2.122_4238514	chr2.122	4238514	C	T	standard	0.824	recommended
536437155	Affx-1249227248	AX-583003565	CATTTCTTCGTTTTTGCTTTGATGACTATGAATAC[A/G]AAATATGATTGAATTATGTTGATTTTATGGAGTAT	R	2	1	2	1	10176	f		218	mosquito (Aedes albopictus)	chr3.93_5973836	chr3.93	5973836	A	G	standard	0.824	recommended
533265149	Affx-1250684851	AX-579883289	AGCTTCCAAATGTATATATTCTGTTTCATTTTTTA[C/T]TGTATAAAAATACCAATATCTCAGTTTTGTTTCTG	Y	2	1	2	1	10176	r		218	mosquito (Aedes albopictus)	chr2.68_2465204	chr2.68	2465204	T	C	standard	0.824	recommended
534637397	Affx-1251236206	AX-581231712	ATATGTAGGTGTATGTGTGTACGTCCTAGTAGTTT[A/T]ACTTCTTCTTTTTAATCCAAATTTTGACCATAGTT	W	4	1	2	1	10176	r		218	mosquito (Aedes albopictus)	chr3.170_2590482	chr3.170	2590482	T	A	standard	0.824	recommended
537487608	Affx-1249753435	AX-584050061	ACGTGAAATTACAGATGATGGGTACAATTGACAGT[A/T]ACGTGCTGATTACGAGTAATTTCGATCCTGCTGAT	W	4	1	2	1	10176	f		218	mosquito (Aedes albopictus)	chr1.85_19274649	chr1.85	19274649	A	T	standard	0.824	recommended
537439348	Affx-1249727348	AX-584001975	ATAATAATAATAATAACAATAATCTGTCGACGCTT[C/T]TATGTGTCAAATTAATTCCTCATAATAGCAAACAG	Y	2	1	2	1	10176	r		218	mosquito (Aedes albopictus)	chr1.85_6328876	chr1.85	6328876	T	C	standard	0.824	recommended
538467739	Affx-1249997012	AX-585022486	CCACCTTTAATTCCTGCTGGGGATACCTCCAAGAA[C/T]TTTCATCAGTTTCCGTCTAAGATTCAAACTTGGAT	Y	2	1	2	1	10176	r		218	mosquito (Aedes albopictus)	chr2.125_6674497	chr2.125	6674497	T	C	standard	0.824	recommended
538246164	Affx-1250290537	AX-584806135	AAAACATGTATGTAAGTGGTTTGCAAACATTCAGA[C/T]TATAAATGTCACGTAAACAGATTGTCACTTTACAA	Y	2	1	2	1	10176	f		218	mosquito (Aedes albopictus)	chr2.186_14398918	chr2.186	14398918	T	C	standard	0.824	recommended
537214927	Affx-1249617077	AX-583778744	TTTTTTCTTTCTTCTAGCAACATGCATCTATCCAA[A/G]CCTCCGTTTGCGTTCAGCTCTCTCTACTGGGCTTC	R	2	1	2	1	10176	f		218	mosquito (Aedes albopictus)	chr1.50_9109565	chr1.50	9109565	G	A	standard	0.824	recommended
534844289	Affx-1251305742	AX-581432900	TTTTTTTCAATGTCGATTCACCGATGTTTATTGTG[A/C]ATTCAGTTTTACCCATTGACCAATTTTAAGCAAAC	M	2	1	2	1	10176	r		218	mosquito (Aedes albopictus)	chr3.180_3306174	chr3.180	3306174	C	A	standard	0.824	recommended
533294031	Affx-1250699250	AX-579912151	AGAGGATGATTTGAGCATACTCATTGCAATTTATG[A/G]CATTTTCCTAATCAAGTGCTACTGTTCGAAGATAA	R	2	1	2	1	10176	r		218	mosquito (Aedes albopictus)	chr2.82_515046	chr2.82	515046	G	A	standard	0.824	recommended
536192561	Affx-1249104929	AX-582759615	GTGAGTATGCAAATTGAAATACCGTACAGAGAGCA[A/G]AAGAAGATAGATAGTATTGGGTTTCTCATTAATGT	R	2	1	2	1	10176	f		218	mosquito (Aedes albopictus)	chr3.75_16145763	chr3.75	16145763	A	G	standard	0.824	recommended
536336331	Affx-1249177123	AX-582903070	ACGCATGGAATTCACATCATGGGAATCTGAAAATG[A/G]AAGTTTTAAAATGATAGGAACTAAGGTACTCTTAG	R	2	1	2	1	10176	f		218	mosquito (Aedes albopictus)	chr3.78_2290684	chr3.78	2290684	G	A	standard	0.824	recommended
534490240	Affx-1251192642	AX-581089633	TGTGAAATCAGCGTTCTCTAATTTAGATTGGAACA[A/G]CTATCAAATTTTGCAACCATCTTGGAGATTAATCC	R	2	1	2	1	10176	f		218	mosquito (Aedes albopictus)	chr3.166_5025070	chr3.166	5025070	A	G	standard	0.824	recommended
537806736	Affx-1249912624	AX-584368223	TGTAAATTAAACATTAATACCACTAGTAACATGAA[A/G]TCTACGATTAAGTTTGTCAAAAAATAATTATCCGT	R	2	1	2	1	10176	f		218	mosquito (Aedes albopictus)	chr2.103_7981186	chr2.103	7981186	A	G	standard	0.824	recommended
537413734	Affx-1249716485	AX-583976463	ATGGATCATGAAGTCATTAAGTCAATGAGCCAGAT[A/C]AAAAAAACAAAATGAAGACGATTGGGTTCTCAAAG	M	2	1	2	1	10176	f		218	mosquito (Aedes albopictus)	chr1.83_658660	chr1.83	658660	C	A	standard	0.824	recommended
533846757	Affx-1250948837	AX-580461587	GTGCAAACAAAGAGATGGTCTTTGAGTAAAGAAAC[A/G]CTTTAAATTTTAATCGGTTAATAAAATATGACCTC	R	2	1	2	1	10176	f		218	mosquito (Aedes albopictus)	chr3.111_3601979	chr3.111	3601979	G	A	standard	0.824	recommended
535216473	Affx-1251448981	AX-581801349	TCCGGTACGGAAGCGGCGAGTTCTTTGAATAGGAA[C/T]TTTATCGGTTCAACGTCTCTCAATGCTAGCAATCA	Y	2	1	2	1	10176	r		218	mosquito (Aedes albopictus)	chr3.40_1431155	chr3.40	1431155	T	C	standard	0.824	recommended
534216325	Affx-1251097273	AX-580821853	ATTGGTATTAGTTTATGTTGGCAGATGTTCTAAAG[A/T]TTATTTTTCTTCCTAAGGACACGAACCCTACGGTA	W	4	1	2	1	10176	r		218	mosquito (Aedes albopictus)	chr3.151_1421045	chr3.151	1421045	A	T	standard	0.824	recommended
534827730	Affx-1251300208	AX-581416647	TGTTGCAAACGAGTACAAAAAAAAAGGATTTCAGG[C/T]TTTCGGTATGATACGGACGTAACTGCAATGAACGA	Y	2	1	2	1	10176	r		218	mosquito (Aedes albopictus)	chr3.180_2064228	chr3.180	2064228	C	T	standard	0.824	recommended
536574305	Affx-1249296186	AX-583140271	GCTCTTTTCTTCGGGTTACCATTGCACATCAACTC[A/T]TAGATTAGCATTCAATCGACAGCGGGAATAATTAT	W	4	1	2	1	10176	f		218	mosquito (Aedes albopictus)	chr1.113_3046977	chr1.113	3046977	A	T	standard	0.824	recommended
536222498	Affx-1249119416	AX-582789496	TTTAGATTTTTAAAGTATACATTAGGAATACTGAT[A/C]ATTTAATCAGTATTAGTATAAGAAAGTACGCAATC	M	2	1	2	1	10176	r		218	mosquito (Aedes albopictus)	chr3.75_21565549	chr3.75	21565549	A	C	standard	0.824	recommended
537710371	Affx-1249863359	AX-584272171	CGAGATTCATTCGATGGCATCCTGCTGCTACTTAT[A/T]TGCTGCACTTCAATAAAACACAATCGAGATCCATC	W	4	1	2	1	10176	r		218	mosquito (Aedes albopictus)	chr1.92_1417760	chr1.92	1417760	T	A	standard	0.824	recommended
535807955	Affx-1248925437	AX-582380593	TGCGAAAATGACAGAAAAATAGTGAGTGAACATGA[A/G]AAAAATTGTTATGCGTTGCTATGACAATTGAAAAC	R	2	1	2	1	10178	f		218	mosquito (Aedes albopictus)	chr3.74_582760	chr3.74	582760	A	G	standard	0.822	recommended
537558539	Affx-1249788867	AX-584120781	AATTTGCTTTACGTGACACGGAATCATAAAAAATG[A/G]AAAATACGTAGAGGCATTACAGTTCAGTATAACCT	R	2	1	2	1	10178	f		218	mosquito (Aedes albopictus)	chr1.90_2066617	chr1.90	2066617	G	A	standard	0.822	recommended
537744081	Affx-1249880152	AX-584305705	ACGCCACTGAAAATAAAATAATAATGAATATAGTA[A/T]TTGCAGTTTTCGTTCAATTAACCACTAAATACCTT	W	4	1	2	1	10178	r		218	mosquito (Aedes albopictus)	chr2.101_706202	chr2.101	706202	T	A	standard	0.822	recommended
536704533	Affx-1249360276	AX-583270014	CGAAGGAACTTCTGGAAATTGTCTTTATAGTGCTC[A/C]TAGATAAATTTACTAGATCCATTCCCAGCAGCTAC	M	2	1	2	1	10178	r		218	mosquito (Aedes albopictus)	chr1.131_8950278	chr1.131	8950278	C	A	standard	0.822	recommended
538536945	Affx-1250066241	AX-585091299	GGGAACATTCCGGATTCATCGAATCCGGGAAAGTT[C/T]CTCATTGATAGGATTGTTACAACCATTTGTAATTG	Y	2	1	2	1	10178	r		218	mosquito (Aedes albopictus)	chr2.151_3194798	chr2.151	3194798	C	T	standard	0.822	recommended
533325358	Affx-1250714873	AX-579943444	GAGATCCGTTTTTGGGATCGATTCACGTGCGTGCA[C/T]CTTAGCTTCTCACCTGATTCATTAAATATGGAATG	Y	2	1	2	1	10178	r		218	mosquito (Aedes albopictus)	chr2.82_10692453	chr2.82	10692453	C	T	standard	0.822	recommended
533762091	Affx-1250916659	AX-580377704	ACCTGAGAAAGACCATAAACCTTACCTACAACATT[A/C]ATTGATTCGAACTCGAACAGCACTAATCCGGTTCG	M	2	1	2	1	10178	f		218	mosquito (Aedes albopictus)	chr3.1_10871183	chr3.1	10871183	C	A	standard	0.822	recommended
537460128	Affx-1249737684	AX-584022658	TTTTGCCAAAAGTGTTCAACAATGGCTGTGAAGTG[G/T]TTTTCCCTTCTATTGTTGGGAAGTCTTCTACTGAT	K	2	1	2	1	10178	r		218	mosquito (Aedes albopictus)	chr1.85_12634158	chr1.85	12634158	T	G	standard	0.822	recommended
533379670	Affx-1250742045	AX-579997725	TTTAAAGCAAATAATTTGCATGCTTTGGGGGTTTT[C/T]ACTTTGCTCTGTGAATGTGGACATGCAAACCCCAA	Y	2	1	2	1	10178	r		218	mosquito (Aedes albopictus)	chr2.82_20892800	chr2.82	20892800	C	T	standard	0.822	recommended
536379776	Affx-1249197809	AX-582946325	TTTAAAGTGGGCTGCTGTGTCTGCGGGACCGTCAG[A/T]TGGAGGTGAATTGATCATTTTTAGTTAAATATAAC	W	4	1	2	1	10178	r		218	mosquito (Aedes albopictus)	chr3.9_416415	chr3.9	416415	T	A	standard	0.822	recommended
537948959	Affx-1249993262	AX-584509966	TCGGGATGGGATGACTTTGGCCATCAAATTACAGT[A/G]AAACGGAGTAATTTTGAAAGGATTCCTGCTTGTTG	R	2	1	2	1	10178	f		218	mosquito (Aedes albopictus)	chr2.125_5419794	chr2.125	5419794	G	A	standard	0.822	recommended
536176814	Affx-1249097083	AX-582743896	TAAAACAAACTAGAAACAGGTCAACAATGCAAGTA[A/T]TAAATTGCAAATGAATGCTCAGTAGACTCAACTGG	W	4	1	2	1	10178	f		218	mosquito (Aedes albopictus)	chr3.75_13381885	chr3.75	13381885	T	A	standard	0.822	recommended
535388753	Affx-1251509092	AX-581971634	TAATTTAAAATACAATTAAATCCCATAGGAATATC[A/G]AAGGAATATTTAAACACTTTCATCAGTTCACATCA	R	2	1	2	1	10178	f		218	mosquito (Aedes albopictus)	chr3.49_6430977	chr3.49	6430977	G	A	standard	0.822	recommended
534171990	Affx-1251086060	AX-580781786	ATTTTACGGAGCAAATCACGGGTTTTGAGCGACGA[A/T]CTTAGACTTTGGAACTGCCAGTTAATTATATGTAT	W	4	1	2	1	10178	r		218	mosquito (Aedes albopictus)	chr3.145_10173863	chr3.145	10173863	T	A	standard	0.822	recommended
537224158	Affx-1249619653	AX-583787943	ACTTGGGAAAATACTTGGGCCGTTCACAGAGAGAG[C/G]TTCAGTTGCGGTAATGTAAGCATGGTCAGTCACGC	S	4	1	2	1	10178	r		218	mosquito (Aedes albopictus)	chr1.50_10755557	chr1.50	10755557	G	C	standard	0.822	recommended
537239759	Affx-1249629537	AX-583803490	TCAGCTGTTGTATACAAGAAGTGTGATAAAGATAC[C/T]GAAACGAAACCATAAAATAAATCGATGCTCTGTAG	Y	2	1	2	1	10178	f		218	mosquito (Aedes albopictus)	chr1.54_793797	chr1.54	793797	T	C	standard	0.822	recommended
534510952	Affx-1251199243	AX-581109190	CAAGCGTTGGGATGTATATTCAGTTTAAACATTAT[A/T]CCATCCAACATTTTTTTCTGAGCTGCATTTATCCC	W	4	1	2	1	10178	f		218	mosquito (Aedes albopictus)	chr3.166_7879893	chr3.166	7879893	T	A	standard	0.822	recommended
537927743	Affx-1249972044	AX-584488818	CTAAATAGATCGAGCTCCTAATAAGTTAGATCCGA[A/T]TTACCTGTGCTATCAATTAGTATTTTATCATGCAT	W	4	1	2	1	10178	r		218	mosquito (Aedes albopictus)	chr2.122_6776429	chr2.122	6776429	T	A	standard	0.822	recommended
536445152	Affx-1249230626	AX-583011514	AATTATTTCGATAGGTACTTTTGTCTGCTTCTTTT[C/T]GAGTTGGTACTCATCCGGATTTAAGGTATCATAAA	Y	2	1	2	1	10178	r		218	mosquito (Aedes albopictus)	chr3.95_2272682	chr3.95	2272682	T	C	standard	0.822	recommended
534263983	Affx-1251114026	AX-580868103	AGGCATGCGATGAGTTTCGCACTGACGACAATCGC[C/T]ATTTCATTAGTCAGTGACCGTGACATTATCAAATT	Y	2	1	2	1	10178	r		218	mosquito (Aedes albopictus)	chr3.151_7259299	chr3.151	7259299	T	C	standard	0.822	recommended
533900528	Affx-1250969502	AX-580514784	TCAAATTATGAATTAGGTTGCTCAAAGTCATGGAA[A/T]GTAAAGGTTAAATTAACCCTCAAACTATTATTAAA	W	4	1	2	1	10178	f		218	mosquito (Aedes albopictus)	chr3.116_8243126	chr3.116	8243126	A	T	standard	0.822	recommended
535444450	Affx-1248800792	AX-582026426	AGTTTCAGCTAAGAGAATACGGGATTCTAACATAA[C/G]ACTGAAAACACATAAGGCTGGATTCTTGGTTGGAT	S	4	1	2	1	10178	f		218	mosquito (Aedes albopictus)	chr3.49_16183650	chr3.49	16183650	G	C	standard	0.822	recommended
538485511	Affx-1250014787	AX-585040155	TGCACCGATTAGCTGTAAGATTTATCCCTCTCTTT[C/T]CCTTAGTAGATTTTCCGCTCTAATAACTATCAATA	Y	2	1	2	1	10178	r		218	mosquito (Aedes albopictus)	chr2.137_62618	chr2.137	62618	C	T	standard	0.822	recommended
534954800	Affx-1251347771	AX-581542023	TCGTATGCTCCCCTGTCTTGTCCTTGCCCAAACGC[C/T]TTCTATAAAGATATCCCACATGGCATCTAAAGTAA	Y	2	1	2	1	10178	r		218	mosquito (Aedes albopictus)	chr3.2_1466641	chr3.2	1466641	T	C	standard	0.822	recommended
534344615	Affx-1251147788	AX-580946775	AGGACAAATTGTAGCAGAACGAATTCCGATTTACA[C/T]CAACAGGATTGAAAGGCAGAGATTCATAGTGTTTA	Y	2	1	2	1	10178	f		218	mosquito (Aedes albopictus)	chr3.16_6650066	chr3.16	6650066	T	C	standard	0.822	recommended
533236065	Affx-1250670327	AX-579854222	TTGCAGAAGCCTGAATTTCCATAACATTCGGATGA[A/G]CTTCAACGATGTTCAGTTATAATAACCCTAGAATG	R	2	1	2	1	10178	r		218	mosquito (Aedes albopictus)	chr2.62_4064025	chr2.62	4064025	G	A	standard	0.822	recommended
537897122	Affx-1249957931	AX-584458310	TAAAAAATCAATTCTGTTTATTAAAACTCTACGAA[A/G]GCAACTTCACATTTGAAATGCACAGCAATTGATTG	R	2	1	2	1	10178	f		218	mosquito (Aedes albopictus)	chr2.122_765225	chr2.122	765225	G	A	standard	0.822	recommended
534157355	Affx-1251081768	AX-580768010	GAACTGTTGCACAATGTAGCACAATTGATGGAATA[C/G]CAATGGTTTAAGTGTTGCCTTCCGTTGGATGAAGT	S	4	1	2	1	10178	f		218	mosquito (Aedes albopictus)	chr3.145_8461136	chr3.145	8461136	G	C	standard	0.822	recommended
534785443	Affx-1251286262	AX-581374932	TACTCATATAGGAATTCCTCTAGAGATTTCATTAT[G/T]ATTCCTCAATTAGATTTCCAGATTGGGCATCCTCT	K	2	1	2	1	10178	r		218	mosquito (Aedes albopictus)	chr3.178_810457	chr3.178	810457	G	T	standard	0.822	recommended
537677798	Affx-1249848256	AX-584239702	GCCAGACAGAAATGTTCTAGACTTATACAGAAGGA[A/T]TGACGAGGCTCTTCGAAAGATTTAGTCATTGGTTG	W	4	1	2	1	10178	f		218	mosquito (Aedes albopictus)	chr1.91_4224426	chr1.91	4224426	A	T	standard	0.822	recommended
537825275	Affx-1249920781	AX-584386717	GTTCGACCCGTGAGTGACGAGAAGTTGTTTCTTTC[A/G]ATTGCCATGGGAGTTAAACTGGCAGATTTGGAGAA	R	2	1	2	1	10178	r		218	mosquito (Aedes albopictus)	chr2.105_703537	chr2.105	703537	A	G	standard	0.822	recommended
534591437	Affx-1251221890	AX-581186612	CTGGAAACTATCAATGAGCCATTAGTGTGTTCAGA[A/G]TAATACAGAAAGGGGCTCTATTACAGTATTCTTAT	R	2	1	2	1	10178	f		218	mosquito (Aedes albopictus)	chr3.168_5699753	chr3.168	5699753	G	A	standard	0.822	recommended
538367583	Affx-1250411979	AX-584927219	AATCGGAAACCCTAAAATATATAGGTCATATCGAA[A/G]CTAAATTTAGTCTAAGCTCATTCCACGCGCCAAGC	R	2	1	2	1	10178	f		218	mosquito (Aedes albopictus)	chr2.196_14794600	chr2.196	14794600	A	G	standard	0.822	recommended
534019039	Affx-1251020751	AX-580631145	CTTTCCCTAAGAAGTCTTTGCAAAGTTTTTTGCTA[C/G]ATTTCACCTGTAATATCTTACAAGGATTCTCGTTA	S	4	1	2	1	10178	r		218	mosquito (Aedes albopictus)	chr3.136_955918	chr3.136	955918	G	C	standard	0.822	recommended
533946743	Affx-1250985604	AX-580559032	TTGGTTATTTGATATTAACGCATATTAATTAGTTT[C/T]GGTTTAAAGTGTTCAAGTAGACTGTATAGAACAGG	Y	2	1	2	1	10178	r		218	mosquito (Aedes albopictus)	chr3.12_2354388	chr3.12	2354388	C	T	standard	0.822	recommended
533069685	Affx-1250588185	AX-579687945	TGATGATGATCATCACTTTAAACTTTTCACTACAA[C/T]TCAATTATTGAGGCACGATCCGATCGCGATCACTA	Y	2	1	2	1	10178	f		218	mosquito (Aedes albopictus)	chr2.48_471488	chr2.48	471488	C	T	standard	0.822	recommended
534319531	Affx-1251138611	AX-580922666	AGGAAGTCGTACACTGAGCAATGAAACTGTATCAG[A/G]AACAGATTGCATTACTATGAATCCGTTCACAACGA	R	2	1	2	1	10178	f		218	mosquito (Aedes albopictus)	chr3.16_1872139	chr3.16	1872139	A	G	standard	0.822	recommended
536445001	Affx-1249231382	AX-583011363	TTCCATAAAATCTACAGGAGCTAATTCTGGGAATC[A/C]TCCAGAAATTCCTTTTGTTTGTAATCTTGCAGGAG	M	2	1	2	1	10178	f		218	mosquito (Aedes albopictus)	chr3.95_2438465	chr3.95	2438465	C	A	standard	0.822	recommended
538148489	Affx-1250192853	AX-584708704	AACCATTTCCAACGAATCAAACACAATGTTTCCAA[C/T]TGTGGCGTGGTGGTGGTGGTACCCAGGTGGTAAAA	Y	2	1	2	1	10178	f		218	mosquito (Aedes albopictus)	chr2.175_4476698	chr2.175	4476698	C	T	standard	0.822	recommended
533368730	Affx-1250736548	AX-579986790	AAAGCTTTAAAAATTAAAGTAAAATGGAAAATTTT[C/T]CTATTCTATTAATAAGATCTACGAAACTTTAGTAG	Y	2	1	2	1	10178	r		218	mosquito (Aedes albopictus)	chr2.82_19213822	chr2.82	19213822	T	C	standard	0.822	recommended
536965532	Affx-1249490651	AX-583530353	AGTTGTTTGTTGTTAGACGTTGGTATCGACGCGAA[C/G]TGCATATGTGACTATAGTTTTTGTTGATGGGATGA	S	4	1	2	1	10178	r		218	mosquito (Aedes albopictus)	chr1.152_5836789	chr1.152	5836789	G	C	standard	0.822	recommended
535493452	Affx-1248820017	AX-582074922	GAAGATATCAAAGGGATCGTAGAACACTCCCTGAA[A/G]TTGAAAATGCAGACATGGATAATGATGTTTACAGT	R	2	1	2	1	10178	f		218	mosquito (Aedes albopictus)	chr3.61_557584	chr3.61	557584	G	A	standard	0.822	recommended
532867489	Affx-1250486482	AX-579485818	TTGAAATGAAATGTGATTTTAGAATAATCCAAGGA[A/T]TGTGTATCACCAATTCCACTAATTTTCATACTTCT	W	4	1	2	1	10178	r		218	mosquito (Aedes albopictus)	chr2.22_7978704	chr2.22	7978704	A	T	standard	0.822	recommended
536444686	Affx-1249231228	AX-583011049	CGTCCAGGATCGTAACGGAATCCATAATGCACTAG[A/G]AAAACTTAATTGAAATGGGAATAAACGCCGATTTT	R	2	1	2	1	10178	f		218	mosquito (Aedes albopictus)	chr3.95_2364740	chr3.95	2364740	G	A	standard	0.822	recommended
535227250	Affx-1251452346	AX-581811975	TTTTATATCCGTGGTCATTTTAAATTTGATGAATG[A/G]AAAACAATATCGAATAACATAGGGTAATTTTGGTA	R	2	1	2	1	10178	f		218	mosquito (Aedes albopictus)	chr3.40_2582714	chr3.40	2582714	A	G	standard	0.822	recommended
534626286	Affx-1251232870	AX-581220908	CTTGTGTTTGTGCAGCGGCGATTCTCCGCGAAGGT[C/G]TTGTACCATGTACTGAAAATCTACTTCTCACAAAC	S	4	1	2	1	10178	r		218	mosquito (Aedes albopictus)	chr3.170_1237593	chr3.170	1237593	C	G	standard	0.822	recommended
533658176	Affx-1250874496	AX-580275322	TCCGCATATCTTTTTGATCCATGCTTTCAAAAATC[A/C]CACACTGATACCTATATTCTATTGTTTCTTCATGT	M	2	1	2	1	10178	f		218	mosquito (Aedes albopictus)	chr2.97_9941266	chr2.97	9941266	A	C	standard	0.822	recommended
537745510	Affx-1249880869	AX-584307125	TACCCACATACAAAATTTCACGCTAATCGGTTCAT[C/T]AGTTTTCGAATCATAGATATCTGTCTGTCTGTCTG	Y	2	1	2	1	10178	r		218	mosquito (Aedes albopictus)	chr2.102_319030	chr2.102	319030	T	C	standard	0.822	recommended
535734106	Affx-1248899842	AX-582311245	CTGGATGTCCAGATTCATTTCCACGGCCATCCTGT[C/T]CGATTTGTTATTACAAGTAAATGCAACGTCTGGAA	Y	2	1	2	1	10180	r		218	mosquito (Aedes albopictus)	chr3.70_1305170	chr3.70	1305170	C	T	standard	0.82	recommended
538521358	Affx-1250050645	AX-585075864	ATATAAGCGTTCAGACAGAAATATATTTTGATTTA[C/T]TGTCAATTATGGCACTCGTGGTAAAGGTACATTCA	Y	2	1	2	1	10180	r		218	mosquito (Aedes albopictus)	chr2.140_19294454	chr2.140	19294454	C	T	standard	0.82	recommended
538704397	Affx-1250233734	AX-585258118	GGCAATAAAATGACGCACTTTTTCTTTTATTCTCT[A/G]TATAACTCGAATATTAACCCGTCTCATGAATCAAC	R	2	1	2	1	10180	r		218	mosquito (Aedes albopictus)	chr2.179_4094149	chr2.179	4094149	A	G	standard	0.82	recommended
532828504	Affx-1250467589	AX-579446860	CAACGTTGAGTGTAGATAATTTTTCCTATGCTAAA[G/T]ATATTTTCATTTTGCTAATGATGTCATTTCAAAAG	K	2	1	2	1	10180	f		218	mosquito (Aedes albopictus)	chr2.22_1078510	chr2.22	1078510	T	G	standard	0.82	recommended
534914973	Affx-1251332298	AX-581502476	CGTACGTAATTCATTAAGATCGACTGAATAAATAT[A/G]TTGATTACCCAAATTCTTGCTACCGTGGCTACGCC	R	2	1	2	1	10180	r		218	mosquito (Aedes albopictus)	chr3.19_1263918	chr3.19	1263918	A	G	standard	0.82	recommended
535868244	Affx-1248949780	AX-582439937	CTCGGCAATTTATTTAATTTGATCCACTCACACAA[A/T]CCACCGCCAGCCGGAGCCACTGACTGACAGCGAAA	W	4	1	2	1	10180	f		218	mosquito (Aedes albopictus)	chr2.17_13500347	chr2.17	13500347	A	T	standard	0.82	recommended
533719817	Affx-1250896774	AX-580335829	TGTGCTTCGACCTTGGTACCTATTGTGTCAGCAAT[A/T]GCCTGAATGGAAGAACATAATGCCGAGATATGTGA	W	4	1	2	1	10180	f		218	mosquito (Aedes albopictus)	chr3.1_3198915	chr3.1	3198915	T	A	standard	0.82	recommended
536734172	Affx-1249375059	AX-583299543	TAGCATAGAGATCGCTCTCGCGCTATCGTTATCAC[G/T]TCCATGTTTACTATGAAACCAAACACAGAAACTTG	K	2	1	2	1	10180	r		218	mosquito (Aedes albopictus)	chr1.139_1498053	chr1.139	1498053	T	G	standard	0.82	recommended
537209618	Affx-1249612384	AX-583773447	GCATTCTGAACGGTGCGCTCGATTTGGCCACCAAA[A/T]TGATGACCTACGAGCAGTACAGGCGTGAAATGAGA	W	4	1	2	1	10180	r		218	mosquito (Aedes albopictus)	chr1.50_6862515	chr1.50	6862515	A	T	standard	0.82	recommended
538705593	Affx-1250234930	AX-585259314	GTTTGCGGTGTGGTTCAAATTTATGCTATGTTCAC[A/T]TCATTTTGTATTTGCTTCTAATCAACATATGACAA	W	4	1	2	1	10180	r		218	mosquito (Aedes albopictus)	chr2.179_4513648	chr2.179	4513648	A	T	standard	0.82	recommended
537091028	Affx-1249555055	AX-583655367	GTCAATGTTATTGTAGGGAAAACCACTATCAAATG[A/G]TAAATGACACATCTTGTCTACCATGTGAGTGCTAC	R	2	1	2	1	10180	f		218	mosquito (Aedes albopictus)	chr1.28_2313357	chr1.28	2313357	G	A	standard	0.82	recommended
537043038	Affx-1249529197	AX-583607570	GTTGCGGAACGGTTACAATCTCTTGTGCTCCCTTT[G/T]GATCTCTTTGAATCGGCGTTTGTGGCAATAAAGTC	K	2	1	2	1	10180	r		218	mosquito (Aedes albopictus)	chr1.25_4576532	chr1.25	4576532	G	T	standard	0.82	recommended
536343851	Affx-1249180914	AX-582910522	GGCGACAATTTTCAGCCCTGTAATTACCATTGCTA[A/T]AGAAACTGGTTATCGACAGCATCTTTTCCTTCCAT	W	4	1	2	1	10180	f		218	mosquito (Aedes albopictus)	chr3.82_213925	chr3.82	213925	A	T	standard	0.82	recommended
538045683	Affx-1250090022	AX-584606246	TTACAACATAGATAGCACGCAATAAGCCTTTGAAA[A/G]TAATGTTTTTCACATTCCAATGCTAGTCAGAGCTG	R	2	1	2	1	10180	f		218	mosquito (Aedes albopictus)	chr2.155_3798570	chr2.155	3798570	A	G	standard	0.82	recommended
536178099	Affx-1249097228	AX-582745177	AAATAAGAAGCTACCGTGCAACAAATGTGAGAAAT[C/G]TTTTAATAGTCGAGCCGCTTTACTTCGGCACATAG	S	4	1	2	1	10180	r		218	mosquito (Aedes albopictus)	chr3.75_13457045	chr3.75	13457045	C	G	standard	0.82	recommended
536108495	Affx-1249062935	AX-582675713	CTACAATTCGTTGTTAAGTGTTTGATATATTTATG[A/T]ATAGCTAAAATTAAGTGAGTAGGTAAGCAAAAACA	W	4	1	2	1	10180	f		218	mosquito (Aedes albopictus)	chr3.75_1642274	chr3.75	1642274	A	T	standard	0.82	recommended
536462720	Affx-1249239374	AX-583029066	AGAAGATCTCTACGAGTTGTTGATTGGAAAGTACA[A/G]TTTACCGTTCAAATCGTAAGCGTTATCGATGAAAG	R	2	1	2	1	10180	r		218	mosquito (Aedes albopictus)	chr3.95_4428149	chr3.95	4428149	G	A	standard	0.82	recommended
533910010	Affx-1250972110	AX-580522756	AGAGAACAGATATACATTAGATGAGATCTTCTGAG[A/T]TTCAATTGCTAATCGTCATCATCCGAAGGTCAATG	W	4	1	2	1	10180	r		218	mosquito (Aedes albopictus)	chr3.118_346532	chr3.118	346532	T	A	standard	0.82	recommended
537505531	Affx-1249762360	AX-584067925	GTCACTTCCTTTCAAGACATATTAATGTTGAAACT[A/T]ATAAGAGGGAATTAAAATAAACTAGAACTATCATC	W	4	1	2	1	10180	f		218	mosquito (Aedes albopictus)	chr1.85_22326381	chr1.85	22326381	A	T	standard	0.82	recommended
538351466	Affx-1250395859	AX-584911151	TTTTTTTTCATGTGAAATTGTTAGAACATATTACA[G/T]ATAATGAATGAACCATAATAACACTATCATCAAAC	K	2	1	2	1	10180	f		218	mosquito (Aedes albopictus)	chr2.196_8598177	chr2.196	8598177	G	T	standard	0.82	recommended
535170037	Affx-1251431039	AX-581755380	TCATAAAGATTGTAGAAAAATAGGCAATTTAGATA[A/G]GAGAGGGCTGAAAAGTTTGTTCGAAATTGAAACGG	R	2	1	2	1	10180	f		218	mosquito (Aedes albopictus)	chr3.32_1619695	chr3.32	1619695	G	A	standard	0.82	recommended
533854729	Affx-1250950868	AX-580469545	TTTGAGACTCTTAGAAGTCTAACATTTCCGTTCAT[A/C]TTTTATATCGCACCCATAACTTTCAGAGCTGCAGG	M	2	1	2	1	10180	r		218	mosquito (Aedes albopictus)	chr3.111_4969269	chr3.111	4969269	C	A	standard	0.82	recommended
536515631	Affx-1249265768	AX-583081776	TTTGGCATTGGTCAAAGAGTGTCATACTAGCTTTA[G/T]TGCTTCTATTCAAGTAGACCAACTTCATGTGTTAG	K	2	1	2	1	10180	r		218	mosquito (Aedes albopictus)	chr1.102_261912	chr1.102	261912	T	G	standard	0.82	recommended
533992596	Affx-1251007492	AX-580604789	CATTTTTCCCAGCGGCAACCCACCACAAAGTCAGA[C/T]ATTTGACAATGTGTATGATAAGGGCATTTTTTATC	Y	2	1	2	1	10180	r		218	mosquito (Aedes albopictus)	chr3.123_685597	chr3.123	685597	T	C	standard	0.82	recommended
535966168	Affx-1248991386	AX-582533689	GGGCCTCCCATTTTTTCCTGGAGTTTGAACACATA[A/G]TCTACAGCCATCGTAACGTTATTTCAGGAAGCATT	R	2	1	2	1	10180	r		218	mosquito (Aedes albopictus)	chr2.17_29573161	chr2.17	29573161	A	G	standard	0.82	recommended
536190683	Affx-1249103974	AX-582757742	AAGCTGAACCTTCCCGATTACCACAAAATTATCAA[A/G]CAACCGATGGATCTGGGAACCATCAAGAAGCGGTT	R	2	1	2	1	10180	f		218	mosquito (Aedes albopictus)	chr3.75_15533975	chr3.75	15533975	G	A	standard	0.82	recommended
533113374	Affx-1250609127	AX-579731612	TTGCGTCTCCACCCTTTTTATTGTGAAGATTGAAG[A/T]TTGTAAGGGATTTTGCTTGAACATGAGTATGACTG	W	4	1	2	1	10180	r		218	mosquito (Aedes albopictus)	chr2.49_537931	chr2.49	537931	T	A	standard	0.82	recommended
533030961	Affx-1250568844	AX-579649237	AACTTATAGGCCTTAGCAGACAGGCGATTAAAGAT[A/G]ATGTAGGATGTAGGCTAGAACTTTGTACACAATTT	R	2	1	2	1	10180	f		218	mosquito (Aedes albopictus)	chr2.42_8077070	chr2.42	8077070	G	A	standard	0.82	recommended
538796540	Affx-1250325889	AX-585350028	AAACCGAATTATCTTCAATGAATTCGGTGTATCTG[A/T]ATCATTTCAATTATTCCACAAACGTATCAATCACC	W	4	1	2	1	10180	r		218	mosquito (Aedes albopictus)	chr2.186_25450343	chr2.186	25450343	T	A	standard	0.82	recommended
537034409	Affx-1249526641	AX-583598959	TTCTAGGAAGGTAACAAAAGAATAACCTTTATGAG[A/T]ACACACACTTTAAAACAACAAACAAAAACGAACCC	W	4	1	2	1	10180	f		218	mosquito (Aedes albopictus)	chr1.25_4045600	chr1.25	4045600	A	T	standard	0.82	recommended
535683247	Affx-1248881013	AX-582260951	AATTGAATGAAACATAAACGATTGTCTCTTCTCTC[C/G]GTTACTCTTGCAGATCCATCAAAATGACTGAGGAA	S	4	1	2	1	10180	r		218	mosquito (Aedes albopictus)	chr3.7_3256541	chr3.7	3256541	G	C	standard	0.82	recommended
537342841	Affx-1249681074	AX-583906000	GTGTAACTACGGTTGCAGCAGACATATATGTTAAA[A/C]TCGACGTCGTCCCCAGATGCACTTGCAGCAATCAC	M	2	1	2	1	10180	f		218	mosquito (Aedes albopictus)	chr1.7_9997286	chr1.7	9997286	C	A	standard	0.82	recommended
533799925	Affx-1250930952	AX-580414795	AAAACTTACATTCGTTTATCTTCTAATCAAAGTCA[A/T]TGTAGTGCAACAAATTTCTTATCATCACTCCGATA	W	4	1	2	1	10180	r		218	mosquito (Aedes albopictus)	chr3.109_3264896	chr3.109	3264896	T	A	standard	0.82	recommended
535571804	Affx-1248844035	AX-582151599	AGAGCTCATTCTAAACTAAAACAATATAGGTAACA[A/G]CAACCCTTCCGAAGGGACGGACTGGTCCCATTCGG	R	2	1	2	1	10180	f		218	mosquito (Aedes albopictus)	chr3.66_3801431	chr3.66	3801431	A	G	standard	0.82	recommended
536817513	Affx-1249416685	AX-583382717	TACTCTCCTGACCTAATCCGCGGCATGACTCTGTT[A/T]CTTTATATTAAGCCCTAAATATTACTCAACATATC	W	4	1	2	1	10180	r		218	mosquito (Aedes albopictus)	chr1.144_4559398	chr1.144	4559398	A	T	standard	0.82	recommended
538328878	Affx-1250373265	AX-584888626	ACGATAAACGACTTTCATAAAGCCAACTCTATTAC[A/T]TTTAAAATTAAAGACAATATGATTGAAGTATTCAT	W	4	1	2	1	10180	f		218	mosquito (Aedes albopictus)	chr2.192_114379	chr2.192	114379	A	T	standard	0.82	recommended
537614680	Affx-1249816749	AX-584176785	GACCCGTGAACTTCTATCCATAGATGGACAAATGA[A/T]TCACTTCCCAAAGCAATGGTATAGCTTACGAAAAA	W	4	1	2	1	10180	f		218	mosquito (Aedes albopictus)	chr1.90_10601936	chr1.90	10601936	T	A	standard	0.82	recommended
533832644	Affx-1250942746	AX-580447488	ATATTTGCTGCGGCAAATGGTATTTCAGACATGGA[A/C]ATTGGAAATCTGGGAATATGTTGAGTGACTCAGCA	M	2	1	2	1	10180	r		218	mosquito (Aedes albopictus)	chr3.111_1005943	chr3.111	1005943	A	C	standard	0.82	recommended
537949780	Affx-1249994083	AX-584510785	ATATTTTAAAATGAAGTGCTCTGTAAGGATGAAAT[C/T]TAGACGACTGTGATGAACTGATTTGAATCAAGAAG	Y	2	1	2	1	10180	f		218	mosquito (Aedes albopictus)	chr2.125_5687779	chr2.125	5687779	C	T	standard	0.82	recommended
532866171	Affx-1250486371	AX-579484500	TTATCAATTTGCGACAAGGTATTATGGCAAATGAC[C/T]AATACCTTAAAAGGTATTTCGTCGAGTGGACGTTA	Y	2	1	2	1	10180	f		218	mosquito (Aedes albopictus)	chr2.22_7958718	chr2.22	7958718	C	T	standard	0.82	recommended
534545754	Affx-1251210091	AX-581141596	GGGAGGCCATCACGACGTTGTTCTTCTTTAATTTG[C/T]TACGTTTTCACCACTTGATTGGAAAGCATAAATCG	Y	2	1	2	1	10180	r		218	mosquito (Aedes albopictus)	chr3.168_1094102	chr3.168	1094102	T	C	standard	0.82	recommended
536538919	Affx-1249277428	AX-583105009	GTGAAGCTGTCGTCGCTAAAGCGATGTGTTCTCCT[G/T]TCTTACAATCCGGTTTCGAAGCTGATCGATTTGCG	K	2	1	2	1	10180	r		218	mosquito (Aedes albopictus)	chr1.106_810016	chr1.106	810016	G	T	standard	0.82	recommended
534945124	Affx-1251344012	AX-581532427	TTCATATCTTGTTTTGATTTTGGCGACAGCTGCCT[A/T]TATGTCTTCGTTTGACAGTAGCTGATTTAATATAT	W	4	1	2	1	10180	r		218	mosquito (Aedes albopictus)	chr3.191_2244171	chr3.191	2244171	A	T	standard	0.82	recommended
538451902	Affx-1249981172	AX-585006679	TCCGATATCTGCGCCACCCATCGCGAATCGATCAG[G/T]ATTTTACTCGACCGTAAACTGCCATGAGATCCCAC	K	2	1	2	1	10180	r		218	mosquito (Aedes albopictus)	chr2.125_1184229	chr2.125	1184229	G	T	standard	0.82	recommended
538499686	Affx-1250028969	AX-585054260	GATCTCAACTGTAAGTTCGTCTTTAGTGTTTCGTA[C/T]TTGACTCGACTTTGAATCCCTTATCAGAATCATCT	Y	2	1	2	1	10180	r		218	mosquito (Aedes albopictus)	chr2.140_9621683	chr2.140	9621683	C	T	standard	0.82	recommended
533437152	Affx-1250770815	AX-580055154	TGCACGTGAGCCTGGAATCCATTGTGGTCATCAGA[A/G]TTGTAGGACACAATACGGTGGGTTCCATCGGCTTC	R	2	1	2	1	10180	r		218	mosquito (Aedes albopictus)	chr2.87_8522279	chr2.87	8522279	G	A	standard	0.82	recommended
533323403	Affx-1250715272	AX-579941489	ACATTCATAATTATATGAACTAAAATCGTTCAACA[A/G]ATACCACATCAAATTTACAGCGACGTTTGCGAAAA	R	2	1	2	1	10180	f		218	mosquito (Aedes albopictus)	chr2.82_10774298	chr2.82	10774298	G	A	standard	0.82	recommended
537620418	Affx-1249818165	AX-584182502	TAGCCAGAACAACAAATAATATCAACATAAACAGA[A/T]TTCAAAACAGTATTTTATTGACTCATCTAGTGCAT	W	4	1	2	1	10180	r		218	mosquito (Aedes albopictus)	chr1.90_11341563	chr1.90	11341563	A	T	standard	0.82	recommended
536518779	Affx-1249267357	AX-583084915	TAATAAATATATTCCTCAAATACATGTCTTTGCTA[G/T]TTTGAAAACAACCTATTTTAACATAACGAAAATCA	K	2	1	2	1	10182	r		218	mosquito (Aedes albopictus)	chr1.102_524972	chr1.102	524972	G	T	standard	0.818	recommended
536533273	Affx-1249275578	AX-583099376	CAAAAAAAAACCATACGTTTCCTGATCTTCACTAA[C/T]TCTTCCGACAACAAGAGAATCCGATCATTGGGTGG	Y	2	1	2	1	10182	f		218	mosquito (Aedes albopictus)	chr1.106_106984	chr1.106	106984	C	T	standard	0.818	recommended
535476433	Affx-1248814611	AX-582058175	GCGTGCACAACGATAATAGCTGCTTGAAATGAATA[G/T]AAATTATGTTTGTTTTCGTTTTGTAACGACAGCAA	K	2	1	2	1	10182	f		218	mosquito (Aedes albopictus)	chr3.58_5931496	chr3.58	5931496	G	T	standard	0.818	recommended
537620938	Affx-1249818432	AX-584183022	AGTATGGAACAGAATGATATGCGGAGGTTTTATGA[A/T]ATTGTCAATAATGTGCGGAAGAAAAATGATCTCAT	W	4	1	2	1	10182	r		218	mosquito (Aedes albopictus)	chr1.90_11491959	chr1.90	11491959	A	T	standard	0.818	recommended
533386023	Affx-1250745215	AX-580004073	TCTACATATTTGTCCCATGAATTTGGTCGTGATTT[C/G]CTTTTCCAATTGGACGCATAATAATCTAACTACGG	S	4	1	2	1	10182	r		218	mosquito (Aedes albopictus)	chr2.82_22908161	chr2.82	22908161	G	C	standard	0.818	recommended
532969953	Affx-1250538324	AX-579588250	AGCTTATTCTACTTTCTTCGCACTACATTTATCAA[A/G]CTGGGTCCAGAATGTACTCGGTAAATTTCACCCCA	R	2	1	2	1	10182	f		218	mosquito (Aedes albopictus)	chr2.36_7971508	chr2.36	7971508	G	A	standard	0.818	recommended
533965205	Affx-1250994639	AX-580577426	ACCAAAATACAATAACAGCAACACGCAATCAAATG[A/G]AAAAAGTCAAACCAAACAATTCAAACTGGAAATGT	R	2	1	2	1	10182	f		218	mosquito (Aedes albopictus)	chr3.122_1923236	chr3.122	1923236	G	A	standard	0.818	recommended
535448997	Affx-1248803292	AX-582030949	TCGCACTATATTTCTGAATCTAGAGCATCAATATA[A/G]TTACACAATATTTGAATCAATGACGATTTCGTATA	R	2	1	2	1	10182	r		218	mosquito (Aedes albopictus)	chr3.50_154352	chr3.50	154352	G	A	standard	0.818	recommended
532969881	Affx-1250537547	AX-579588179	CTCGTTCATGCCGGTCGTTGTCGTGCACGTATAGA[C/T]TGCTTTTGAATAAGCCTGTTATACATGTACACTAT	Y	2	1	2	1	10182	r		218	mosquito (Aedes albopictus)	chr2.36_7740791	chr2.36	7740791	T	C	standard	0.818	recommended
533600864	Affx-1250853667	AX-580218682	GAACGCGAATACCGGCTAATGATTAGTATGATAAG[C/T]CAAACGTCCGGCTCTGCCGTAAACTTCGTCTTTCG	Y	2	1	2	1	10182	f		218	mosquito (Aedes albopictus)	chr2.97_1278140	chr2.97	1278140	C	T	standard	0.818	recommended
536914736	Affx-1249466566	AX-583479681	AGGCGTAGAACCTAGTCACATTTTACCAACAATAT[A/T]CATTTCCAGAGGCACCAGAACAAAAGGAACCTGGG	W	4	1	2	1	10182	f		218	mosquito (Aedes albopictus)	chr1.149_5541360	chr1.149	5541360	T	A	standard	0.818	recommended
537512042	Affx-1249765615	AX-584074429	TCAGTAAGATATAAAGAACGTAAGTAATATTGGAA[A/C]AGATAGAAAATAGAAGATAGAAGATAGAAGATAGA	M	2	1	2	1	10182	f		218	mosquito (Aedes albopictus)	chr1.85_23469108	chr1.85	23469108	A	C	standard	0.818	recommended
536326995	Affx-1249172426	AX-582893774	AAGGTTTTCCATTCCCATTTCCTAAAACGAATAAT[A/T]CATTTTCCATTCAGGTTTGTCTTAGAGCTATGTTA	W	4	1	2	1	10182	f		218	mosquito (Aedes albopictus)	chr3.78_521608	chr3.78	521608	A	T	standard	0.818	recommended
532883773	Affx-1250494565	AX-579502100	TTATCTGCTGCTGGATATAAACTAGGAATTCTGCT[C/T]GATTCATGATCATATTTGCTAATGCCAATGGAATT	Y	2	1	2	1	10182	r		218	mosquito (Aedes albopictus)	chr2.22_11295878	chr2.22	11295878	T	C	standard	0.818	recommended
533171401	Affx-1250639069	AX-579789578	CGCAAGATGTAAGTACTGTTACGAGAGATAAAAAA[A/G]AAATCTGTTTTCCCAAGAAAAAGCTATGTTATGAC	R	2	1	2	1	10182	f		218	mosquito (Aedes albopictus)	chr2.60_11387775	chr2.60	11387775	G	A	standard	0.818	recommended
536187989	Affx-1249102626	AX-582755054	CTTTAAGCTTAAGAATCAGTGTTTTCAATGCAGAT[A/T]GAAAATGCGTGCCATATGATACTCACTGGAAGCAA	W	4	1	2	1	10182	f		218	mosquito (Aedes albopictus)	chr3.75_15111066	chr3.75	15111066	T	A	standard	0.818	recommended
536715081	Affx-1249366591	AX-583280521	GCCACTGTGTTCACTCTTAGAAACATTATGTTGTA[A/T]ACTGCTGGAAGTATTGCTGACATTCTTAAAAGGTT	W	4	1	2	1	10182	f		218	mosquito (Aedes albopictus)	chr1.133_1512936	chr1.133	1512936	A	T	standard	0.818	recommended
533607662	Affx-1250855826	AX-580225442	GTGCCATCTCTGAGAAAAACAAGCTTTGTTTTTAT[C/T]CTATTGTCTTTTATAACCTGCACATGACTTCCCTC	Y	2	1	2	1	10182	r		218	mosquito (Aedes albopictus)	chr2.97_1902034	chr2.97	1902034	C	T	standard	0.818	recommended
536679896	Affx-1249348954	AX-583245434	TGTTTAAGTCGTAAAATAGGAGTAAATAGACTAAA[A/G]CGAGAAGAAGCTAGGAGGAAATATTCACAGAAAAA	R	2	1	2	1	10182	f		218	mosquito (Aedes albopictus)	chr1.131_2461699	chr1.131	2461699	G	A	standard	0.818	recommended
534960225	Affx-1251349348	AX-581547410	CAACTTTTCGTTTGGACTTGTTTCATACTAGGAAC[C/T]CAGTTCCCAAAACTTATCGCATTTTCTCGCACAGA	Y	2	1	2	1	10182	f		218	mosquito (Aedes albopictus)	chr3.20_598047	chr3.20	598047	C	T	standard	0.818	recommended
536563255	Affx-1249290616	AX-583129242	AAAAATTATGAACCAACGTTTAGGCTTAAGCAAGA[C/T]TTAAGAATGTACTTAAGAGAACATTTATATTGACA	Y	2	1	2	1	10182	f		218	mosquito (Aedes albopictus)	chr1.113_638467	chr1.113	638467	C	T	standard	0.818	recommended
533504895	Affx-1250805859	AX-580122844	GACACCTATAAGGTGGCTGAATGGATATACAATAA[A/T]TCATAAAATCTACTTCATCATATAAAAAGCATTGT	W	4	1	2	1	10182	f		218	mosquito (Aedes albopictus)	chr2.87_22410070	chr2.87	22410070	T	A	standard	0.818	recommended
533389547	Affx-1250748329	AX-580007594	GCTTGCTTCTTAATATTAATGCATCGTTTTACAAA[A/G]TCTATGTATAGTTCGCTCACCGACCGTTGGATCGA	R	2	1	2	1	10182	f		218	mosquito (Aedes albopictus)	chr2.86_115003	chr2.86	115003	G	A	standard	0.818	recommended
534948214	Affx-1251344632	AX-581535499	TCCAAACTACCCAAAAGCCATGTTCACCTTTAACA[A/C]AAAACTAAAAAAGTATTTGCTTGCCCATGTGTTAC	M	2	1	2	1	10182	f		218	mosquito (Aedes albopictus)	chr3.191_2498325	chr3.191	2498325	C	A	standard	0.818	recommended
535394269	Affx-1251511094	AX-581977110	TAACAATATTACAAGCAAGAGGATTCAAATAAGTC[A/G]AATCAATAAAAAAAAATAAAAACAACTTTTTTCCG	R	2	1	2	1	10182	f		218	mosquito (Aedes albopictus)	chr3.49_6913282	chr3.49	6913282	A	G	standard	0.818	recommended
533873246	Affx-1250958655	AX-580488031	GAAGGCTTGGGAGAATACGTTAGAGATGATGGACT[A/T]AAACTGGACAGCTTTTTCGTGAAAAAGGTGGATTT	W	4	1	2	1	10182	f		218	mosquito (Aedes albopictus)	chr3.116_1033715	chr3.116	1033715	T	A	standard	0.818	recommended
537557188	Affx-1249786336	AX-584119435	TATAAAATTTGTCACTTAAACTCGTACAGAACTTG[C/T]TATTCAGCATTTACAGTTGCACTTCTGCAAAAAAA	Y	2	1	2	1	10182	r		218	mosquito (Aedes albopictus)	chr1.90_1216489	chr1.90	1216489	C	T	standard	0.818	recommended
533599305	Affx-1250851903	AX-580217124	CTTTACTTTCGGAATGACTCTTATATTGTATAACG[A/T]TTCAAATTGCAGTATTTTACATCCAATACACAATC	W	4	1	2	1	10182	r		218	mosquito (Aedes albopictus)	chr2.97_613477	chr2.97	613477	T	A	standard	0.818	recommended
534272360	Affx-1251117776	AX-580876285	CGTGTAAGCAGATTTCATCGTGCCGTTGTAATTTT[C/T]TTTTAAGATCCAAATCAGTACGGCAGAAAGAAAAC	Y	2	1	2	1	10182	r		218	mosquito (Aedes albopictus)	chr3.151_9154262	chr3.151	9154262	C	T	standard	0.818	recommended
537425958	Affx-1249720655	AX-583988626	TTGCCAACATCAACATATGGGTGGAAGAGCAACTG[A/C]GATTTAAATTGAAACATGAGTAAGGCTAATGTCAT	M	2	1	2	1	10182	r		218	mosquito (Aedes albopictus)	chr1.85_1439621	chr1.85	1439621	C	A	standard	0.818	recommended
538875683	Affx-1250405049	AX-585428903	AGGAACATGCAAACATATTGCCCGATCCTTCTCGG[A/T]TTCTCACAGCTATCAAATTGTTGGAACTTTTACGA	W	4	1	2	1	10182	r		218	mosquito (Aedes albopictus)	chr2.196_12160961	chr2.196	12160961	T	A	standard	0.818	recommended
538066666	Affx-1250111010	AX-584627144	GCTTGCTACTGTAGTGTTGCTTGTTGTAAAGAACA[C/T]AGCGATCTTCATCGTTACGAGTGTCCAGGATATGA	Y	2	1	2	1	10182	f		218	mosquito (Aedes albopictus)	chr2.155_15883297	chr2.155	15883297	T	C	standard	0.818	recommended
537868701	Affx-1249943717	AX-584429975	TTTAGATGGCACTAAAATCTTAACTACACTCAATA[A/T]CAGAAGAGGTATTGAAATTGAAAGCACTTTCACCA	W	4	1	2	1	10182	f		218	mosquito (Aedes albopictus)	chr2.118_287407	chr2.118	287407	A	T	standard	0.818	recommended
536118441	Affx-1249067353	AX-582685646	CTCAGAACACTAATTATCTAAGGAATTCCCAAAAG[A/T]TAAAATGATTGCCAGAGAAGTTCCCAAAAAAAATG	W	4	1	2	1	10182	r		218	mosquito (Aedes albopictus)	chr3.75_2837099	chr3.75	2837099	T	A	standard	0.818	recommended
532939541	Affx-1250523102	AX-579557844	TTGTATTGTTCTTTCACACGCTTCTCACTTCTAAA[A/G]CATGCTTGTATTCCTATTGTGGTAAATTTAGTCCA	R	2	1	2	1	10182	f		218	mosquito (Aedes albopictus)	chr2.36_1714888	chr2.36	1714888	A	G	standard	0.818	recommended
536402831	Affx-1249210423	AX-582969300	AGCACGTCAAACGAGGCATCTACAAACAAATAACA[A/G]TTAAAAATAATACTTACGGAGAAGATCGTAGAGTC	R	2	1	2	1	10182	f		218	mosquito (Aedes albopictus)	chr3.90_58399	chr3.90	58399	A	G	standard	0.818	recommended
534053992	Affx-1251038646	AX-580666060	CAATTAAATAGGAATCGTTAATTGAGACGTATAAA[A/C]CTTCTATGTGTGTATAATGATGGTAAAGAGGCTTG	M	2	1	2	1	10182	f		218	mosquito (Aedes albopictus)	chr3.136_8096399	chr3.136	8096399	A	C	standard	0.818	recommended
538249563	Affx-1250293936	AX-584809531	GTAAACATGCCAACCCTTGGAACTATATGAACGAA[C/T]TCTATGCTGGCGATTTGGCTATTCGACTGGGAAAT	Y	2	1	2	1	10182	f		218	mosquito (Aedes albopictus)	chr2.186_15406559	chr2.186	15406559	C	T	standard	0.818	recommended
537565311	Affx-1249790406	AX-584127536	TTGAATAAGGTCGTTTAATCGGTCACTGTCATGTG[C/G]CATTGAAGAATATGAATTTCGCATGTGCGTGCATC	S	4	1	2	1	10182	r		218	mosquito (Aedes albopictus)	chr1.90_2538835	chr1.90	2538835	G	C	standard	0.818	recommended
538537843	Affx-1250067140	AX-585092188	AGTGAAAATTTTGCAGAAGTGTTAACAGTATTATT[A/G]ATTGTGATTGTCGAGTGGTGATTTTACGTATTTTC	R	2	1	2	1	10182	r		218	mosquito (Aedes albopictus)	chr2.151_3630615	chr2.151	3630615	G	A	standard	0.818	recommended
536224383	Affx-1249120351	AX-582791380	ACAAAAAAAAACTTGATTTAACTTATCTAAATGTA[A/T]TTAGCCCAGTATCACTAAGATCACTTATCCCACGA	W	4	1	2	1	10182	r		218	mosquito (Aedes albopictus)	chr3.75_21931144	chr3.75	21931144	T	A	standard	0.818	recommended
535731968	Affx-1248898680	AX-582309110	AATAAAGACAGATTGACATACTATAGCAAACTAGA[A/G]ATAATATAAATGTAATACGGACAGAACTTGTCACA	R	2	1	2	1	10182	f		218	mosquito (Aedes albopictus)	chr3.70_1036949	chr3.70	1036949	G	A	standard	0.818	recommended
534096303	Affx-1251057973	AX-580707982	TTGCCAATGAAACGGAACTTCTAATTGAACTACGA[A/G]CAATTATTCTACCTCACCTAATGGATTTTCTGTCT	R	2	1	2	1	10182	f		218	mosquito (Aedes albopictus)	chr3.142_2530680	chr3.142	2530680	A	G	standard	0.818	recommended
535093768	Affx-1251404660	AX-581680058	GATGGAATTCTTTTTTTTTCGGTTGTGATTTTGTG[A/G]TTTGATATAAAACATTCGGAGCCCTCTTGTTGAAC	R	2	1	2	1	10182	r		218	mosquito (Aedes albopictus)	chr3.28_891516	chr3.28	891516	G	A	standard	0.818	recommended
537805733	Affx-1249911023	AX-584367223	TTCTGGAATTTTTATTTTTTTTTCGTAAAACTAGG[C/T]TTGATGTTTTGAATCATGGTTACTTATAATAACTT	Y	2	1	2	1	10182	r		218	mosquito (Aedes albopictus)	chr2.103_7687782	chr2.103	7687782	C	T	standard	0.818	recommended
535058095	Affx-1251389416	AX-581644647	TCAATTATCCGCAACGAGCCCATCGATGATTCCTT[C/T]CATATTGTTGCCTGCACTTTATCTGTGTTCGGGTG	Y	2	1	2	1	10182	r		218	mosquito (Aedes albopictus)	chr3.27_646019	chr3.27	646019	C	T	standard	0.818	recommended
537819957	Affx-1249919237	AX-584381413	CCAGCTGATGATACGTGTATCAAAAGCAATGAATG[A/G]CAAATAGAAACCTCTAAAACAGCAAGGAACAAGTG	R	2	1	2	1	10182	f		218	mosquito (Aedes albopictus)	chr2.105_440943	chr2.105	440943	A	G	standard	0.818	recommended
533357112	Affx-1250732073	AX-579975177	GATATTGTTTAACTTTGGTCCCTTGTAAATTGAAC[A/G]TACAGAATTCTACAAAACCCCTTAGGTCTGTGAAG	R	2	1	2	1	10182	f		218	mosquito (Aedes albopictus)	chr2.82_17079078	chr2.82	17079078	A	G	standard	0.818	recommended
536226813	Affx-1249122131	AX-582793806	TCAAAAAAGACGGTTTTCAGATTCATCGACACATA[A/T]ACTGTCACAGATTTTTTTTACGAAAAGGTGCTAAA	W	4	1	2	1	10182	f		218	mosquito (Aedes albopictus)	chr3.75_22563812	chr3.75	22563812	A	T	standard	0.818	recommended
536863331	Affx-1249440833	AX-583428407	AGTTACGATGTACAGCGAATGATTCTGACATTAAA[A/C]ACTCAAGCCCGGTTTAATGTTTTCGGTTTTGTTTC	M	2	1	2	1	10182	f		218	mosquito (Aedes albopictus)	chr1.147_5347162	chr1.147	5347162	A	C	standard	0.818	recommended
538391873	Affx-1250436278	AX-584951414	TTTGTGAATAGTTGCGATACATGCTTAAAGATGAC[A/C]AATGTTTCAGGAAGTAAGGAAACGAACAAGTGGAT	M	2	1	2	1	10182	f		218	mosquito (Aedes albopictus)	chr2.205_339704	chr2.205	339704	A	C	standard	0.818	recommended
535219631	Affx-1251449637	AX-581804466	GTGTTAGTACCTGTTATAATAAAATTAGATCAGAA[A/C]ATATGACAATTTGCAAATGTTCCAAAGAGAGGCAA	M	2	1	2	1	10182	f		218	mosquito (Aedes albopictus)	chr3.40_1643563	chr3.40	1643563	A	C	standard	0.818	recommended
533869201	Affx-1250956198	AX-580483989	TGTAAATAGTCCATGCCCTGGGCCGCCTGTCGGGC[G/T]ATATCTATTAGCGTATTCAATTTGAACTTTGTCTC	K	2	1	2	1	10182	r		218	mosquito (Aedes albopictus)	chr3.116_418023	chr3.116	418023	G	T	standard	0.818	recommended
533396544	Affx-1250751859	AX-580014588	CTGGTCTTTCTCCTGCTCGAACAATCCTTTCATAT[A/T]ACATCCAGGCCATGATGAACATATAATGGGGAGAA	W	4	1	2	1	10182	f		218	mosquito (Aedes albopictus)	chr2.87_957718	chr2.87	957718	T	A	standard	0.818	recommended
533856886	Affx-1250951639	AX-580471701	CGGACAAATTGGAATTTTTCACAGAATTTTGATTA[A/C]ATTGGTATCTCTACACTCTCTTGAAAATCATATGT	M	2	1	2	1	10182	r		218	mosquito (Aedes albopictus)	chr3.112_53307	chr3.112	53307	A	C	standard	0.818	recommended
537146179	Affx-1249582632	AX-583710287	AAGCAATTCGGTCAAGCCATTTGAGTCAAATGAAG[C/T]ATCCGAACATACAATTACTGGTCGGTGTATGGTAA	Y	2	1	2	1	10182	f		218	mosquito (Aedes albopictus)	chr1.41_3466575	chr1.41	3466575	T	C	standard	0.818	recommended
536028555	Affx-1249022503	AX-582595945	GCACTTTGTTTCGCACTTTTTTCTTGTTTCAAGTT[G/T]CATCTATGATAATTCCCTTGCATAAGAAACACTTG	K	2	1	2	1	10182	r		218	mosquito (Aedes albopictus)	chr2.17_43564407	chr2.17	43564407	G	T	standard	0.818	recommended
534836769	Affx-1251302284	AX-581425476	AGCGTTCACAGTTTTGATGATAAAATTTGGATTCA[A/T]ATCAAAGAGTCACAGAACCAAAATATAAGAGTGAT	W	4	1	2	1	10182	f		218	mosquito (Aedes albopictus)	chr3.180_2667562	chr3.180	2667562	A	T	standard	0.818	recommended
535248644	Affx-1251461288	AX-581833192	CATTTTCAGGTTGTTTTGTCACTATTTTGTGTTAC[A/T]TTGATTCCATACATCTAAACAGTTTTTGATCTCAC	W	4	1	2	1	10182	f		218	mosquito (Aedes albopictus)	chr3.40_5821633	chr3.40	5821633	T	A	standard	0.818	recommended
534856014	Affx-1251309005	AX-581444444	TTTCAAGTTAAGAACTAACTAAAATATCGTGAAAT[A/G]AGCACTCCAAAGAAAAGTACACTGCAATTTCCTTA	R	2	1	2	1	10182	f		218	mosquito (Aedes albopictus)	chr3.180_4357900	chr3.180	4357900	A	G	standard	0.818	recommended
535005116	Affx-1251368091	AX-581592057	TGTGCTTTTTTAATTTGAAAATGTCCACAACAGGT[A/C]TTTTACGAAAGTTTATGAATGGAATGTGAATATTG	M	2	1	2	1	10182	r		218	mosquito (Aedes albopictus)	chr3.20_8193832	chr3.20	8193832	C	A	standard	0.818	recommended
534879850	Affx-1251317405	AX-581467849	AACGAGAAAAATAAAACCACATCTTATAATTGAAC[C/T]ACCATTCGCCTTACCACCCCCCCTTGATTACTTCC	Y	2	1	2	1	10182	f		218	mosquito (Aedes albopictus)	chr3.180_6719709	chr3.180	6719709	C	T	standard	0.818	recommended
534458338	Affx-1251183086	AX-581059502	AGTGTTTTTCACTCACACACTACTAAATCCCAGTT[C/G]GTTTCGTTCGCGTAAAATTTATGCACATCACGCTC	S	4	1	2	1	10182	r		218	mosquito (Aedes albopictus)	chr3.166_1250728	chr3.166	1250728	G	C	standard	0.818	recommended
534321878	Affx-1251139703	AX-580925005	CCATTACGAATATATATATTAGGCAGTAAACTGAA[A/G]TAATATTAACCGAATGAAAAGTAATTCCATTGTGT	R	2	1	2	1	10182	f		218	mosquito (Aedes albopictus)	chr3.16_2243563	chr3.16	2243563	A	G	standard	0.818	recommended
538039677	Affx-1250084013	AX-584600270	TGTCCCATTTTAGGTTGTGTAAGCACATTTTTAGA[A/C]TCACAGTTTCCTTCACTTACCTACGACCATCCGCA	M	2	1	2	1	10182	f		218	mosquito (Aedes albopictus)	chr2.153_1347641	chr2.153	1347641	C	A	standard	0.818	recommended
537009435	Affx-1249512437	AX-583574119	AATGGGCAATAAGCAAGTAGTAAAAATCATTACGA[A/T]CTCATTCTATATTGGAAAAGGCCACTGGGAGGGAT	W	4	1	2	1	10182	r		218	mosquito (Aedes albopictus)	chr1.170_2029480	chr1.170	2029480	A	T	standard	0.818	recommended
538845639	Affx-1250374999	AX-585398954	CACAATATTTTAAACAATACAAAAAAATGAAAAAG[A/C]ATTCGTTTAACTAAAAGATCCGAAATTCACTCATT	M	2	1	2	1	10182	r		218	mosquito (Aedes albopictus)	chr2.193_529794	chr2.193	529794	C	A	standard	0.818	recommended
535947165	Affx-1248982094	AX-582514721	TGCACATTGATGTCATTATGGTAATCCAACGAATC[G/T]ACCCCACCGCCCAAATTCAATCCAGCGAATGTGTA	K	2	1	2	1	10182	f		218	mosquito (Aedes albopictus)	chr2.17_26720177	chr2.17	26720177	G	T	standard	0.818	recommended
537873325	Affx-1249946018	AX-584434586	AAACATCTAAATAAATTAGATAAACAGTTGGAATC[G/T]CTATAATAAAGATAATAATAATAAAGATAAGCATA	K	2	1	2	1	10182	f		218	mosquito (Aedes albopictus)	chr2.118_1868923	chr2.118	1868923	G	T	standard	0.818	recommended
538016794	Affx-1250061112	AX-584577548	ATCTCTTCGATGATCAACCATTATAACCCTACAAT[A/T]TTTAAAACATTGTTTCCACCATGTCAAACAGCTCC	W	4	1	2	1	10182	f		218	mosquito (Aedes albopictus)	chr2.140_24439668	chr2.140	24439668	T	A	standard	0.818	recommended
536656601	Affx-1249336370	AX-583222273	AATGACGACGAGGCAGAGACCTCCTCTGGAGTTTT[A/G]ACGTTAGATTCATGTCAAATCCGTTTATCGGATTT	R	2	1	2	1	10182	r		218	mosquito (Aedes albopictus)	chr1.124_4989016	chr1.124	4989016	G	A	standard	0.818	recommended
536159930	Affx-1249088672	AX-582727047	GCGTTCGATTATCTCAGATTACTCATTGTAGACCT[A/T]AAGTAATTTTTAATCAATTTTAGTTTCGAAAAGCT	W	4	1	2	1	10182	f		218	mosquito (Aedes albopictus)	chr3.75_10145133	chr3.75	10145133	T	A	standard	0.818	recommended
537805198	Affx-1249911837	AX-584366689	GCATCGGATACTTACATGGAACGGTAATCAAACGT[C/T]AACTGTAATACAAAATTAGAGATGACATTTTATGT	Y	2	1	2	1	10184	f		218	mosquito (Aedes albopictus)	chr2.103_7842530	chr2.103	7842530	T	C	standard	0.816	recommended
537675835	Affx-1249847296	AX-584237740	ACTAAAACTAGCGGAAATTTATGCGATTATGTGAA[A/T]CAAATTATGCATGTCTTGCGCTTTCATGGAGTCGA	W	4	1	2	1	10184	f		218	mosquito (Aedes albopictus)	chr1.91_4109492	chr1.91	4109492	A	T	standard	0.816	recommended
538107849	Affx-1250152206	AX-584668161	ACCCAATCATGAAATTGAAGTAAGGAATCCTATGA[A/G]TAATCCCTAGAGGAATCCTGGGCCGAATACTCAGA	R	2	1	2	1	10184	f		218	mosquito (Aedes albopictus)	chr2.167_4493894	chr2.167	4493894	G	A	standard	0.816	recommended
537697538	Affx-1249856943	AX-584259388	AAGGTTAAATGAAATATCAGAGCTTTATCGCTTAT[C/T]TGTATTTTTCTCGCACTTTGCTTAAACCATCATTT	Y	2	1	2	1	10184	r		218	mosquito (Aedes albopictus)	chr1.91_6978010	chr1.91	6978010	C	T	standard	0.816	recommended
533748965	Affx-1250910559	AX-580364586	GAAATCGATAAATTTTGCACAATCAGAGGGCAAGT[A/T]AAGTTACCGCCCCTGCCGCCTTTGGAAGGCTGATT	W	4	1	2	1	10184	f		218	mosquito (Aedes albopictus)	chr3.1_8843839	chr3.1	8843839	T	A	standard	0.816	recommended
533202728	Affx-1250654833	AX-579820893	TTTACGAATTGATTTGCACAATTGATTTGGAGGTA[A/T]ACTGCATTCGTTTTGATTTGGGCCCTTCAATGTGC	W	4	1	2	1	10184	f		218	mosquito (Aedes albopictus)	chr2.61_1516347	chr2.61	1516347	T	A	standard	0.816	recommended
537862563	Affx-1249940599	AX-584423876	CATTGATTGCATTAATATGTTTCACACCACCAACA[A/C]ACGAATCACCCCAACAAAATATTTCGAACCTTTTC	M	2	1	2	1	10184	f		218	mosquito (Aedes albopictus)	chr2.107_7828181	chr2.107	7828181	C	A	standard	0.816	recommended
534781605	Affx-1251283891	AX-581371186	TCATAGTAACTAGCATTTTGAGCAACCTAAAAGTG[C/G]AGATATTGGTATCATTTGATTTTTGTACGTTTTCA	S	4	1	2	1	10184	f		218	mosquito (Aedes albopictus)	chr3.176_1204792	chr3.176	1204792	G	C	standard	0.816	recommended
538709022	Affx-1250238360	AX-585262716	TGCTGACAGCTCTTCGGGACTGTCGTCGTCGTTGT[C/T]GTCATTACCATCCGTTTCTCGATGTGACATCGAAA	Y	2	1	2	1	10184	r		218	mosquito (Aedes albopictus)	chr2.182_1357929	chr2.182	1357929	C	T	standard	0.816	recommended
533411335	Affx-1250757868	AX-580029370	GTAGGGAAATGTTATACTTTTTCTGTCGGCGACAG[A/T]TTCAGCTGAGAAAGATTAAGGAAAAGTTGCTGACT	W	4	1	2	1	10184	r		218	mosquito (Aedes albopictus)	chr2.87_4003399	chr2.87	4003399	T	A	standard	0.816	recommended
537379161	Affx-1249697243	AX-583942164	ATCGTATGGGATTATCTTTGCTTGCACATGAATCA[A/T]AGTTTTGGATGTTGTCGAAGTTCTATACCAAGAAC	W	4	1	2	1	10184	r		218	mosquito (Aedes albopictus)	chr1.7_18799953	chr1.7	18799953	A	T	standard	0.816	recommended
533467982	Affx-1250787519	AX-580085958	AAAATGAATAAATAGTAGAAATCGTGATAATACAC[C/T]CTGAACTCTCCCTTGAGATCAGTAGGCTGTCCAAA	Y	2	1	2	1	10184	f		218	mosquito (Aedes albopictus)	chr2.87_14957782	chr2.87	14957782	C	T	standard	0.816	recommended
535196971	Affx-1251441915	AX-581782069	CCGCCACGTCTGAAGTATAAGTTTGATTACGATAG[C/T]TCCCTGTTTACAGGTAAATGTTCCAACTCTCCTGC	Y	2	1	2	1	10184	f		218	mosquito (Aedes albopictus)	chr3.36_168105	chr3.36	168105	T	C	standard	0.816	recommended
535533500	Affx-1248832529	AX-582114065	CAACAACTAGTACAAACCTTAATCAATTTCGCCAA[C/T]GCCCTCATAAGTGGTTCGTTGTCCTGCATCCGACC	Y	2	1	2	1	10184	f		218	mosquito (Aedes albopictus)	chr3.66_26603	chr3.66	26603	C	T	standard	0.816	recommended
535109682	Affx-1251409465	AX-581695748	CTCTCTTCATGCGTACGTTCCAAATGGCGAAAGAT[C/G]TGCTCTTAGCTTGATATTAAGTATAAATTTCAAAT	S	4	1	2	1	10184	f		218	mosquito (Aedes albopictus)	chr3.28_5565947	chr3.28	5565947	C	G	standard	0.816	recommended
537851098	Affx-1249934830	AX-584412430	CTGGAAAAGCAAACCGCAAGGTTTATATAATCAGA[A/G]ACAAGCCCATGCAGAGTGATTTTGTGCAATGTCAT	R	2	1	2	1	10184	f		218	mosquito (Aedes albopictus)	chr2.107_6052252	chr2.107	6052252	G	A	standard	0.816	recommended
537321959	Affx-1249670664	AX-583885220	AAATGATGTAAACATCTCACCTACGTAATCAATCC[A/C]AAAGATACTCACAGTACGATATAACCATGTCGCTT	M	2	1	2	1	10184	f		218	mosquito (Aedes albopictus)	chr1.7_5299373	chr1.7	5299373	C	A	standard	0.816	recommended
537397805	Affx-1249708506	AX-583960624	GATATTTTAATTGACAAACTATAATACGCATACAA[A/T]CCAGTAAGTAGAGTGCGACAAAACAGCAACAATTA	W	4	1	2	1	10184	f		218	mosquito (Aedes albopictus)	chr1.74_6072626	chr1.74	6072626	T	A	standard	0.816	recommended
537834400	Affx-1249925323	AX-584395781	TTCCTGTACCGGTTGCTGGTAAAGAGGTATCACTT[C/T]ATCTTTTACAGTTAGAGTCTTATTGGCGAGATCTA	Y	2	1	2	1	10184	r		218	mosquito (Aedes albopictus)	chr2.107_2823488	chr2.107	2823488	C	T	standard	0.816	recommended
538190900	Affx-1250235267	AX-584751007	ATCGCGTCGTATCCTTGAGTTTGCGATTGTTACTA[G/T]ATTTGTGAACAATTTGCACGCATTGGGTTTGGTAC	K	2	1	2	1	10184	f		218	mosquito (Aedes albopictus)	chr2.18_311676	chr2.18	311676	G	T	standard	0.816	recommended
533269789	Affx-1250687180	AX-579887928	CCAAACACTCCGTTAGGTAAATAATTAAGCATAAA[A/T]TCATTCGGATGCTTTGCTTCTTCGAATTGCTATTC	W	4	1	2	1	10184	r		218	mosquito (Aedes albopictus)	chr2.68_3502156	chr2.68	3502156	T	A	standard	0.816	recommended
534694560	Affx-1251253389	AX-581287905	TTATTATTATTTATATAAATCGCAAACACAAACAG[A/C]AAACGTGCGTGTGAAAATCGAAATCAGCTCCTATT	M	2	1	2	1	10184	f		218	mosquito (Aedes albopictus)	chr3.170_8815010	chr3.170	8815010	C	A	standard	0.816	recommended
537287307	Affx-1249653372	AX-583850741	CGATCTATTTATCGAACGAGATTGAGCGAGAATAA[A/G]CGAGATAAAAAGCAGATTTCAACATTCTTAAACAT	R	2	1	2	1	10184	f		218	mosquito (Aedes albopictus)	chr1.67_4646732	chr1.67	4646732	G	A	standard	0.816	recommended
537829636	Affx-1249922950	AX-584391050	CAGGGCTCAAAGTTTAAATTTATCTATTTTTTTTA[A/T]TTTCGTGATATTTAAGAAGATACTGATACAAATTT	W	4	1	2	1	10184	r		218	mosquito (Aedes albopictus)	chr2.107_387264	chr2.107	387264	T	A	standard	0.816	recommended
534684256	Affx-1251249849	AX-581277683	CAACAAACAAAACAAGCTAAAACCCAGCTAGTAAT[A/T]CATAGAAACACACACACACATACTAGATAAGCAAT	W	4	1	2	1	10184	f		218	mosquito (Aedes albopictus)	chr3.170_7322663	chr3.170	7322663	A	T	standard	0.816	recommended
537903118	Affx-1249960903	AX-584464293	TGTCCAAACCTCGCAGTCTCACTTTTATTTTCTAA[A/T]CCATGGGAGGATAATCTGCTCAACAGACACCTGAA	W	4	1	2	1	10184	f		218	mosquito (Aedes albopictus)	chr2.122_1774311	chr2.122	1774311	A	T	standard	0.816	recommended
537558995	Affx-1249789092	AX-584121237	TTTCATCATCATACTTACGCTAGAAGCAATTAGGA[A/T]CTGTCAATATAACCTCCAAACTGTTTTCGCTATAA	W	4	1	2	1	10184	f		218	mosquito (Aedes albopictus)	chr1.90_2162023	chr1.90	2162023	T	A	standard	0.816	recommended
537924323	Affx-1249970253	AX-584485411	GTGTCTAATAATAGTTAATACCCAACATATGTGGA[A/G]ATTATATGTAATTGGCCTTCTTTTCATATTGTTAC	R	2	1	2	1	10184	r		218	mosquito (Aedes albopictus)	chr2.122_5974166	chr2.122	5974166	A	G	standard	0.816	recommended
537531900	Affx-1249773710	AX-584094251	AATTTTCATACGAAGGACGAATAGAGAGATAGATG[G/T]TTTGTCAAACGGTTGTTACGGGCTAACAAGTTCAG	K	2	1	2	1	10184	r		218	mosquito (Aedes albopictus)	chr1.85_27129706	chr1.85	27129706	G	T	standard	0.816	recommended
536299439	Affx-1249158620	AX-582866279	TTTGCGAACTATGGAACTGTGCTTAAACTGAAATC[A/C]TGTAACATGAATCGTGTTGAAAATTAGAAGTATCG	M	2	1	2	1	10184	f		218	mosquito (Aedes albopictus)	chr3.77_14813422	chr3.77	14813422	A	C	standard	0.816	recommended
533480936	Affx-1250794013	AX-580098898	TCTACCGTAATTCTAAATTCATCTATTTACCCAAA[C/T]TTTCACGTCGCTCGTAATTTCTCCCCCCACATGTG	Y	2	1	2	1	10184	f		218	mosquito (Aedes albopictus)	chr2.87_18321547	chr2.87	18321547	C	T	standard	0.816	recommended
535089859	Affx-1251403374	AX-581676183	TAAACTTTTTCATCTTTTTTCAAGAATTACCGCAG[A/G]ATTTCTGTTAAATATTGGAACTTTGTAGTAAAAAT	R	2	1	2	1	10184	r		218	mosquito (Aedes albopictus)	chr3.28_415493	chr3.28	415493	G	A	standard	0.816	recommended
536641731	Affx-1249328844	AX-583207449	GCGTTGATCAAGGTCGAACAAGTGGGATCACGTCT[A/G]ATCTTTTCAGGTACATGTCATACAAACAACCAGGA	R	2	1	2	1	10184	r		218	mosquito (Aedes albopictus)	chr1.124_2106090	chr1.124	2106090	G	A	standard	0.816	recommended
537733038	Affx-1249875793	AX-584294717	AGTAAATATTCTGCTCTGCTGAATACAGCCCTGAA[A/T]CGATCACTATGTCCGAGAGTGTTCAGCAGCAGTTT	W	4	1	2	1	10184	f		218	mosquito (Aedes albopictus)	chr2.100_1793030	chr2.100	1793030	T	A	standard	0.816	recommended
538679158	Affx-1250208492	AX-585232943	CATTATCCTTGATCCAGATCGTACCGTTTTGTTTA[C/T]GTTTCAATGCAATGTGAAGGATAGGAAGAAGGCGT	Y	2	1	2	1	10184	r		218	mosquito (Aedes albopictus)	chr2.176_299670	chr2.176	299670	T	C	standard	0.816	recommended
538208192	Affx-1250252561	AX-584768235	AAGCAAACATTGCGTGACAGTCGGACTAAAAAGTC[A/C]AGGAACGTTTGATCGATATTTCGGTCGCCCTGAAA	M	2	1	2	1	10184	f		218	mosquito (Aedes albopictus)	chr2.186_773541	chr2.186	773541	A	C	standard	0.816	recommended
535469179	Affx-1248811768	AX-582050965	TTTCGATGTCAGGTTTATGAACTAGAAGAAGCATA[C/T]ACACTCGCACGAAGCTATCACGTTTCAGACAAGCG	Y	2	1	2	1	10184	f		218	mosquito (Aedes albopictus)	chr3.58_5002428	chr3.58	5002428	C	T	standard	0.816	recommended
533764606	Affx-1250916749	AX-580380127	CAGTGGAGAGAACTAACCGAGTGCACTACAAATCA[A/G]ATTGCCCATTTTTCTAACAGTATTGATCCTTTCTC	R	2	1	2	1	10184	r		218	mosquito (Aedes albopictus)	chr3.1_10894015	chr3.1	10894015	G	A	standard	0.816	recommended
537182511	Affx-1249600831	AX-583746460	AATCCTCCAATATCTGTCCTCATTTGCATTCAATC[A/G]CACTTACCGATATATATGAGAAAAATCCACACTTT	R	2	1	2	1	10184	f		218	mosquito (Aedes albopictus)	chr1.5_351284	chr1.5	351284	G	A	standard	0.816	recommended
537296060	Affx-1249657744	AX-583859436	GTCTGTCAGACAACAATAGTTTAGAGGTGATAGAA[G/T]ACATAAAACAAATGATAAACGACAGAAGATAGAAA	K	2	1	2	1	10184	f		218	mosquito (Aedes albopictus)	chr1.67_9781586	chr1.67	9781586	G	T	standard	0.816	recommended
534132180	Affx-1251076359	AX-580743640	CCAAAGCCAAAACAGCTCAACCAGAAGGCGCGCGT[C/G]ATTCGAAATTTGAACTACGAGAACAAAGCTCTTTT	S	4	1	2	1	10184	r		218	mosquito (Aedes albopictus)	chr3.145_6127204	chr3.145	6127204	G	C	standard	0.816	recommended
537713315	Affx-1249864806	AX-584275107	CTCCATTGTTTATTAGTATAGTATATCACAATTTT[C/T]TTTTGCACTTAAACTGTGTCTGGTTTCAACCTTCG	Y	2	1	2	1	10184	r		218	mosquito (Aedes albopictus)	chr1.92_1765872	chr1.92	1765872	C	T	standard	0.816	recommended
537522003	Affx-1249768769	AX-584084374	ATGTTATGCTCAATCTCTAATTATTTTGCATTTTT[G/T]TTTAATTTCAGGTATGTCGATGTTCCTTTATTTGG	K	2	1	2	1	10184	r		218	mosquito (Aedes albopictus)	chr1.85_24485324	chr1.85	24485324	G	T	standard	0.816	recommended
533507030	Affx-1250805772	AX-580124979	GTCACGTCAGTGCAACGGGGGGTATGTTTATGTAA[C/T]ATTTGAAGTATATGAAGTATTTGGCAGAATTTTTA	Y	2	1	2	1	10184	r		218	mosquito (Aedes albopictus)	chr2.87_22381333	chr2.87	22381333	T	C	standard	0.816	recommended
538099124	Affx-1250143479	AX-584659447	GGTGGCACTTTCGACCGTTAATCATTTTCCAACAT[A/G]AAAAAATTCCGTAGCACTCAGTCTCGCGACAACGT	R	2	1	2	1	10184	f		218	mosquito (Aedes albopictus)	chr2.167_1368614	chr2.167	1368614	G	A	standard	0.816	recommended
536815828	Affx-1249417032	AX-583381035	GCTATTTACAAATCTCTTAGCTTTCTGCACTTACA[G/T]CCTAGTTAAATTACTATACCCTAGTGAAACTTATG	K	2	1	2	1	10184	f		218	mosquito (Aedes albopictus)	chr1.144_4682808	chr1.144	4682808	T	G	standard	0.816	recommended
533204657	Affx-1250654681	AX-579822821	ATCGTTCGATCTATCTCAGTTCGTCTTTGAAACTT[A/G]GATTCCCTAGTGTTTCATGTAGCCTGCGTTTCTTG	R	2	1	2	1	10184	r		218	mosquito (Aedes albopictus)	chr2.61_1499178	chr2.61	1499178	G	A	standard	0.816	recommended
536931590	Affx-1249475024	AX-583496497	TGGCATGGAAGACCAGTAAACACCCATAACAATCA[A/C]AACTTCATCAAAATCGAAGACCATCCACTAGCAAC	M	2	1	2	1	10184	f		218	mosquito (Aedes albopictus)	chr1.152_22315	chr1.152	22315	C	A	standard	0.816	recommended
536485332	Affx-1249250657	AX-583051633	TAAGTGCTGAACAACGTGCGTATTCAATTCAATTC[A/C]TAAATCTATAGTACTTCATCATTCTGCTCTCGAAT	M	2	1	2	1	10184	r		218	mosquito (Aedes albopictus)	chr1.10_3186908	chr1.10	3186908	C	A	standard	0.816	recommended
538138011	Affx-1250182375	AX-584698257	GAGGTAAAGAAGATCTCTAGATGTATGGTAAATAC[A/G]AACCTCCATTTCAGTAATAGGTGGGGAGAACACAA	R	2	1	2	1	10184	f		218	mosquito (Aedes albopictus)	chr2.175_1073081	chr2.175	1073081	G	A	standard	0.816	recommended
533132999	Affx-1250619896	AX-579751215	ATCATCGTTGGTAGGTATTTAGGTATACTACATAC[C/T]AACCCCCCATGTTGGCGACGACGCGAGTTGTTTAC	Y	2	1	2	1	10184	f		218	mosquito (Aedes albopictus)	chr2.60_1337078	chr2.60	1337078	C	T	standard	0.816	recommended
538453479	Affx-1249982750	AX-585008254	ACCTCCCTAGTGGAGCGCGCGCAGTGTGTATGATC[A/G]GTATGAGCGGTCTAGAAAAATAGGATATTGTTCAA	R	2	1	2	1	10184	r		218	mosquito (Aedes albopictus)	chr2.125_1929583	chr2.125	1929583	G	A	standard	0.816	recommended
534976576	Affx-1251355707	AX-581563671	GCCGGTGAATTGAAAGTTTGTCAGGAAGCTACAAT[A/G]ATGGAAAGATTTCACCTCCAATATAAATTTTGTAT	R	2	1	2	1	10184	f		218	mosquito (Aedes albopictus)	chr3.20_3464359	chr3.20	3464359	A	G	standard	0.816	recommended
537886842	Affx-1249951438	AX-584448074	ATGGAGTGGTAGCATTATCGTCATCGAAAAATGAT[C/T]ATTGTAGTGAATTACGAAAATCTATTGCACATGTG	Y	2	1	2	1	10184	r		218	mosquito (Aedes albopictus)	chr2.118_3877525	chr2.118	3877525	C	T	standard	0.816	recommended
533717324	Affx-1250895667	AX-580333393	GTGCTTTTATCAGTTTTGAACGAGTAGTACAGATA[G/T]AATTGTTGGGAGCTAGCGGGCCACCAGTTATGTGC	K	2	1	2	1	10184	f		218	mosquito (Aedes albopictus)	chr3.1_2861627	chr3.1	2861627	G	T	standard	0.816	recommended
533902505	Affx-1250969420	AX-580516553	GCAGATCTTGGTCATTTTTGCTTTAATTTTCATTA[C/T]TTTACGTCGATTCCTTTTGGTTCTGAAATTATGCA	Y	2	1	2	1	10184	r		218	mosquito (Aedes albopictus)	chr3.116_8217842	chr3.116	8217842	T	C	standard	0.816	recommended
534605220	Affx-1251225817	AX-581200119	TATTATGAAAACATGACCTTATTTGGAGATGAGAA[A/G]CTACCGTATGGTTTAAGATGTCCGTTAACCGGCAG	R	2	1	2	1	10184	f		218	mosquito (Aedes albopictus)	chr3.168_7591984	chr3.168	7591984	G	A	standard	0.816	recommended
537540419	Affx-1249777950	AX-584102726	GTAAATCGATGGAAACCATTGAACAACTATTATTA[C/T]TTCAGATTGTGAGTTTGACAAAGCGTCGCAGCTAA	Y	2	1	2	1	10184	r		218	mosquito (Aedes albopictus)	chr1.85_28614113	chr1.85	28614113	C	T	standard	0.816	recommended
532967655	Affx-1250536436	AX-579585952	AATGTTTCTGCAACTCATCGTAATCTCGATTTTTT[C/T]CATGCTCGTTATAATTACTCGGCAAGCGTTCTTGG	Y	2	1	2	1	10184	r		218	mosquito (Aedes albopictus)	chr2.36_7270403	chr2.36	7270403	C	T	standard	0.816	recommended
536649385	Affx-1249332699	AX-583215088	ACGAACGCACATCTTTGCCCCCGACATGCCTTTAT[G/T]TCATACTAAAAATTCAGTAGAAATTGGTGCTAACC	K	2	1	2	1	10184	r		218	mosquito (Aedes albopictus)	chr1.124_3646408	chr1.124	3646408	T	G	standard	0.816	recommended
535857833	Affx-1248945516	AX-582429659	ATAGGGTGGATCATAGCAATACATGGGCATATCAA[A/G]TGAAATCAAAAGTTTTCCGGTTTTATCTGGCATCT	R	2	1	2	1	10184	f		218	mosquito (Aedes albopictus)	chr2.17_12084134	chr2.17	12084134	G	A	standard	0.816	recommended
538576531	Affx-1250105841	AX-585130691	CTACTGATAAGGTGTAGTTGTGTTTTGTTGTATTT[C/T]CATTCTGCTTGTCCTTATATTTGCAAATATTTTGC	Y	2	1	2	1	10184	r		218	mosquito (Aedes albopictus)	chr2.155_11474627	chr2.155	11474627	T	C	standard	0.816	recommended
537782998	Affx-1249899605	AX-584344526	AAATAATATCCTAATTCGTTTTTTGCGTGTTCTAT[A/T]CTTTCTTAGATTTTCTCTAAGATTGCAACAGTCCC	W	4	1	2	1	10184	r		218	mosquito (Aedes albopictus)	chr2.103_4484951	chr2.103	4484951	T	A	standard	0.816	recommended
536164930	Affx-1249090654	AX-582732034	ATTTGTTTCTGCCTAACCAACTTGAATCAAAGATT[C/T]GACATGCATTTGTCTACTGCAAGACTCATTCGAAA	Y	2	1	2	1	10184	r		218	mosquito (Aedes albopictus)	chr3.75_11022688	chr3.75	11022688	C	T	standard	0.816	recommended
537564034	Affx-1249791608	AX-584126262	AAACTTCCACTTTTCAGGTAACTTTAATGTCCTAC[A/T]TTTGTAGTCAAATATTCACAGCTTCAAGGTAAATG	W	4	1	2	1	10184	f		218	mosquito (Aedes albopictus)	chr1.90_2880143	chr1.90	2880143	A	T	standard	0.816	recommended
534075231	Affx-1251048660	AX-580687089	CTAACAACCCATATGAAGATACATCGGAAACGAAA[C/T]ACGGATTCAGACTCCGGTAAAGATGTTAAGCAGCT	Y	2	1	2	1	10184	f		218	mosquito (Aedes albopictus)	chr3.139_2488492	chr3.139	2488492	T	C	standard	0.816	recommended
537626934	Affx-1249821445	AX-584189009	AAAATGATGCAGTATGGTCTGTACGCGACCGGAGT[A/T]ATTGCGGTATTATCTAGTTTTGCCAACGATTTCGC	W	4	1	2	1	10184	r		218	mosquito (Aedes albopictus)	chr1.90_12410555	chr1.90	12410555	A	T	standard	0.816	recommended
534851142	Affx-1251307290	AX-581439660	AATCAAGTTTTGTGAACTAAGATCAAGTGATTCCA[A/T]ATAGTTATTAGGAAATTTTGTTTACGTATTTTCGG	W	4	1	2	1	10184	f		218	mosquito (Aedes albopictus)	chr3.180_3849193	chr3.180	3849193	A	T	standard	0.816	recommended
536123590	Affx-1249069966	AX-582690783	AATATATGCCATATTTGGTGCGGGGGTGAATATTT[C/T]TTACTTCTATTTCTCTTTTAGAGCCCATAGTAGTT	Y	2	1	2	1	10184	r		218	mosquito (Aedes albopictus)	chr3.75_3704331	chr3.75	3704331	T	C	standard	0.816	recommended
535061570	Affx-1251390994	AX-581648100	CACTTGAGACACCACAACGCATTCGGCATCGCGTG[C/T]GTCATACAGTTTTCGCCCTTATTTCTATATTTTCC	Y	2	1	2	1	10184	r		218	mosquito (Aedes albopictus)	chr3.27_2260161	chr3.27	2260161	C	T	standard	0.816	recommended
538930177	Affx-1250459557	AX-585483174	TTCATATCGAGACCGATTGCTTATTCGGACGATTT[C/G]AGTTACATCATACCTGGTGCAGTTATTTATGATCG	S	4	1	2	1	10184	r		218	mosquito (Aedes albopictus)	chr2.205_8407198	chr2.205	8407198	G	C	standard	0.816	recommended
535239057	Affx-1251457785	AX-581823696	TCATTCATATAGTTATTTAACAAACTTGAAATAAT[G/T]TTTCAGAGCTGTATTTCAACTAAGCGCCCTATTGC	K	2	1	2	1	10184	r		218	mosquito (Aedes albopictus)	chr3.40_4586651	chr3.40	4586651	T	G	standard	0.816	recommended
534331318	Affx-1251143312	AX-580933911	TATCATAGACAACAAGCATTGCAAGGGAGATAAGA[C/T]TTAAATTTTAATTTCAATTGGTTATCAAAAAACTG	Y	2	1	2	1	10184	f		218	mosquito (Aedes albopictus)	chr3.16_3905234	chr3.16	3905234	C	T	standard	0.816	recommended
537187609	Affx-1249601414	AX-583751539	GTATGAAGCTTGCGTTCAACATTCCACACAAGAAA[G/T]AGTATAATGTAAAACTCAGTGAGATGGGATAGAAT	K	2	1	2	1	10184	r		218	mosquito (Aedes albopictus)	chr1.5_667312	chr1.5	667312	T	G	standard	0.816	recommended
535670217	Affx-1248876049	AX-582248038	CACTCGCTCATTCGCTCACTAGCTCACTAGCTTTT[C/T]GATTCACTTACTAATCTATATATCAATCCTCTACA	Y	2	1	2	1	10184	r		218	mosquito (Aedes albopictus)	chr3.7_1663282	chr3.7	1663282	C	T	standard	0.816	recommended
537471939	Affx-1249745626	AX-584034437	CTACAGCACTGCCTCTAATTACTCAGTAGTGTAAA[G/T]TATTATCTACATTTTCAATGACTTCTCCATAGATT	K	2	1	2	1	10184	f		218	mosquito (Aedes albopictus)	chr1.85_15784416	chr1.85	15784416	G	T	standard	0.816	recommended
534087097	Affx-1251055086	AX-580698842	TAAAAAGGAACCAGAAGTTCACACGTTTTGTTTTA[C/T]TTCTATTCTAGCCAAATACGACTCGGACCGGATAG	Y	2	1	2	1	10184	r		218	mosquito (Aedes albopictus)	chr3.142_1410976	chr3.142	1410976	C	T	standard	0.816	recommended
538373897	Affx-1250418297	AX-584933502	CTGATTTGTACTCTCTTGCCTATAGCTCGTGTCAA[A/T]TCTAGATCGCTCTCTCGTGGACCGCTATCAAAAAG	W	4	1	2	1	10186	f		218	mosquito (Aedes albopictus)	chr2.198_2450754	chr2.198	2450754	A	T	standard	0.814	recommended
536726214	Affx-1249372148	AX-583291616	AGCATACGAGCGGTGGACAGATCAATGAATGTAAA[A/G]ATACCTTTTACCACACTCGTCACAAACATGAGGTT	R	2	1	2	1	10186	f		218	mosquito (Aedes albopictus)	chr1.134_1851230	chr1.134	1851230	G	A	standard	0.814	recommended
537298919	Affx-1249659204	AX-583862280	ATTTTAAAATCGACGCAGAAAAATGACTTTGGCAT[A/T]ATAATGATCATGATACCAAACCACCCAATACAATG	W	4	1	2	1	10186	f		218	mosquito (Aedes albopictus)	chr1.67_10303233	chr1.67	10303233	A	T	standard	0.814	recommended
537975522	Affx-1250019829	AX-584536411	AAAAGTATTTCATTTCACTCATTCAAACACTCATA[C/T]ACATGTTGCTGTGTAGCGCTGTGAATCTAGCTAAT	Y	2	1	2	1	10186	f		218	mosquito (Aedes albopictus)	chr2.140_3783183	chr2.140	3783183	T	C	standard	0.814	recommended
534432624	Affx-1251174370	AX-581033925	GATAACAACGGTTAGGGTTAAGGATCCATTGTCAA[A/T]TCATTCTTCATGTAGGATTTATTAATCATGATTAA	W	4	1	2	1	10186	f		218	mosquito (Aedes albopictus)	chr3.163_2249852	chr3.163	2249852	A	T	standard	0.814	recommended
537425162	Affx-1249722200	AX-583987839	ACACTCTATAAACTTCACATCACGTCAAATCGACA[A/C]CACCTCCCCTTTTTCATTAGGTGGAATTGAAATCA	M	2	1	2	1	10186	f		218	mosquito (Aedes albopictus)	chr1.85_3682853	chr1.85	3682853	C	A	standard	0.814	recommended
536433231	Affx-1249224526	AX-582999646	CGGATAATAAAGTTCTTTTGCGATTTCACGTAGGT[A/T]ATTGTTTAAACGACAAAAGTTAAGATTTGTACTTT	W	4	1	2	1	10186	r		218	mosquito (Aedes albopictus)	chr3.93_4566714	chr3.93	4566714	A	T	standard	0.814	recommended
534338449	Affx-1251145575	AX-580940684	TGCATTTCAAAGGAATGGTGCGAGAAACGTTCAAG[A/G]TATCTGGTAACAGCGAAAATGTTTCGATGTAGAAA	R	2	1	2	1	10186	f		218	mosquito (Aedes albopictus)	chr3.16_5463928	chr3.16	5463928	G	A	standard	0.814	recommended
533188569	Affx-1250646653	AX-579806736	TTCTCCGCTTTGCAGCTCATGTTTGCGATTTTTCT[C/T]TTTCATCAAATCCGTACTATACGTTCTGAATTACT	Y	2	1	2	1	10186	r		218	mosquito (Aedes albopictus)	chr2.60_15336021	chr2.60	15336021	C	T	standard	0.814	recommended
535480087	Affx-1248815801	AX-582061774	TAACTAAGCATATGAAGTTATCAAGTAGATCTACA[A/T]TAGAGTGTTCCAAAAATGCACGTTGTCAAAAATGT	W	4	1	2	1	10186	f		218	mosquito (Aedes albopictus)	chr3.58_6594421	chr3.58	6594421	T	A	standard	0.814	recommended
538697827	Affx-1250227162	AX-585251572	CATTGAGAAGTGGATGATGATCTTTTTTTTCGTTC[C/T]ACTTGGTATTGTCCGATCTGAACCTATCTGAACCA	Y	2	1	2	1	10186	r		218	mosquito (Aedes albopictus)	chr2.177_6429695	chr2.177	6429695	C	T	standard	0.814	recommended
535065952	Affx-1251392671	AX-581652475	CAATCGATTTTGATGAGGGAAATATGCGAATGAAG[A/G]AAAATGGGAAAAATGTTTGACAGTTTTCACGACAT	R	2	1	2	1	10186	f		218	mosquito (Aedes albopictus)	chr3.27_2693655	chr3.27	2693655	G	A	standard	0.814	recommended
538632393	Affx-1250161722	AX-585186313	ATGTAGTTTATTGTCGTAGCAATAAACTTCATTTT[G/T]CATATTTACTTTTTACAATAAAACACGCTAGCACT	K	2	1	2	1	10186	r		218	mosquito (Aedes albopictus)	chr2.17_2175118	chr2.17	2175118	T	G	standard	0.814	recommended
533303947	Affx-1250704196	AX-579922043	ACCAGAATACTGGTAAGACTGATTTCAACATTTAA[A/G]TTTCATACCTACCTTGTGATTTGTGGTTTCTGCAT	R	2	1	2	1	10186	r		218	mosquito (Aedes albopictus)	chr2.82_4264810	chr2.82	4264810	A	G	standard	0.814	recommended
535249402	Affx-1251461592	AX-581833936	GCAATGTACACTTTCAATAGAAAGTTTGGGATTAC[A/T]TTTAGAAAATAAGAGAACTTTTGAAGCCCATATCT	W	4	1	2	1	10186	f		218	mosquito (Aedes albopictus)	chr3.40_6578892	chr3.40	6578892	T	A	standard	0.814	recommended
533145926	Affx-1250626358	AX-579764119	TTGGTGAAGCCTTGGTAGTCCTTTACACGAAATGA[C/T]AAATCATTATGATGGGGGGTTTCGTCCTTCGCGTG	Y	2	1	2	1	10186	f		218	mosquito (Aedes albopictus)	chr2.60_6000126	chr2.60	6000126	C	T	standard	0.814	recommended
538823241	Affx-1250352596	AX-585376636	CCTGGTTTCTTGAACGTCGGCTGAGGGTAATCACG[A/G]ATCTTTTCCTTCACAGCGTAGGAATTGTGCGGGAA	R	2	1	2	1	10186	r		218	mosquito (Aedes albopictus)	chr2.19_3356748	chr2.19	3356748	G	A	standard	0.814	recommended
536176372	Affx-1249096862	AX-582743462	AGTCATACGCATCGATTGAAGCGATAATTTGAACA[A/G]TTTCATACCTTATGCCGTATAGGATTAGTTTTAAA	R	2	1	2	1	10186	f		218	mosquito (Aedes albopictus)	chr3.75_13324592	chr3.75	13324592	A	G	standard	0.814	recommended
536441402	Affx-1249229581	AX-583007774	TCCTCTTCACTGACCGATATGGACAAATTCCAAAT[A/G]CTGCTGCTGTCCCCAAAACTGGCTCTTAGCTCTTC	R	2	1	2	1	10186	f		218	mosquito (Aedes albopictus)	chr3.95_982667	chr3.95	982667	G	A	standard	0.814	recommended
533732449	Affx-1250901965	AX-580348202	TCAACCCCAACCCAGCTTACTTTGATTGATTGTTC[A/T]TTCTCTCCATTCAGTAATGATTATTTGCTCAGCGC	W	4	1	2	1	10186	r		218	mosquito (Aedes albopictus)	chr3.1_5759677	chr3.1	5759677	T	A	standard	0.814	recommended
535058199	Affx-1251388991	AX-581644750	TGACCCCATCGGAAGTGCTTGTTACCCATAATCAA[A/G]ACTGAATTAAACATACGGGAAGTGGATAGTGTGTC	R	2	1	2	1	10186	f		218	mosquito (Aedes albopictus)	chr3.25_2080345	chr3.25	2080345	G	A	standard	0.814	recommended
532952906	Affx-1250529093	AX-579571207	CAAACAGTTCCTCTCTCTCATCCTTCACTCAATCA[C/T]TTCCACACGAGTTCAACTATTAATTTTCGAATTGT	Y	2	1	2	1	10186	r		218	mosquito (Aedes albopictus)	chr2.36_4430010	chr2.36	4430010	C	T	standard	0.814	recommended
533472881	Affx-1250788626	AX-580090850	TACCTACGGGTTGGGGTGGCGTCTACAGTACACAT[A/G]ATGTCACTTTCGTTGCATTAGTGCCGTAACATGGG	R	2	1	2	1	10186	r		218	mosquito (Aedes albopictus)	chr2.87_15723104	chr2.87	15723104	A	G	standard	0.814	recommended
536770565	Affx-1249394377	AX-583335889	CAAAGATACTGCGCTTTTCCCTTTGGGTGTACTAT[A/T]CAATCACCTACTCTAAGAACCAATAATGTGCCCTG	W	4	1	2	1	10186	f		218	mosquito (Aedes albopictus)	chr1.139_9375855	chr1.139	9375855	A	T	standard	0.814	recommended
538846047	Affx-1250375407	AX-585399356	TCTTTGCATCCTGGTGATCACATGAAGATACTGAG[A/G]TTAGTTTGGGAACTGCAGATTGTAGATAAGTCTAC	R	2	1	2	1	10186	r		218	mosquito (Aedes albopictus)	chr2.196_14755	chr2.196	14755	A	G	standard	0.814	recommended
533719777	Affx-1250895776	AX-580335789	ATCGAGCACATGCTACACGCGTAATCACCGTGCTG[A/G]TGAGTCATGTGTAGTATTAGATGAGGTTCTTGAAT	R	2	1	2	1	10186	r		218	mosquito (Aedes albopictus)	chr3.1_2878039	chr3.1	2878039	A	G	standard	0.814	recommended
537782797	Affx-1249900685	AX-584344325	ACTGATACATAATTTGTAGCGCAATGAGCAATAAA[A/G]TAATATATTTGAAATAATTGTGTGTGCTTTTTTTT	R	2	1	2	1	10186	f		218	mosquito (Aedes albopictus)	chr2.103_4824015	chr2.103	4824015	A	G	standard	0.814	recommended
536169445	Affx-1249092917	AX-582736543	AGTGATGCTCGTAGACTCGACGTGCTGAGCTGGGC[A/G]ATTGCGTCAATGTTTGTTGAAAGTCCTCGGAATGA	R	2	1	2	1	10186	r		218	mosquito (Aedes albopictus)	chr3.75_11968520	chr3.75	11968520	A	G	standard	0.814	recommended
536342111	Affx-1249178973	AX-582908811	GTGGGTTTTGTTTTGTAAAATTAAACATAAAACGT[C/T]ATTGATGTGGCTAATATATGTTTTAGGTGAAACCC	Y	2	1	2	1	10186	r		218	mosquito (Aedes albopictus)	chr3.78_2769742	chr3.78	2769742	T	C	standard	0.814	recommended
535380154	Affx-1251506436	AX-581963094	GCCAGCAACTTGTCCAACCAGGGCCTTCGCTCCGG[C/T]TTGTCATCCATGTCGTATAACTTGTTTAAGCTGTC	Y	2	1	2	1	10186	r		218	mosquito (Aedes albopictus)	chr3.49_5274033	chr3.49	5274033	C	T	standard	0.814	recommended
535824906	Affx-1248932596	AX-582397334	TGATGATTCTATAAACAAAGTATTATAAGCACTTT[G/T]TAGATTAGCATTAATACTAAAACATTGTCTTGTTT	K	2	1	2	1	10186	r		218	mosquito (Aedes albopictus)	chr3.74_2444333	chr3.74	2444333	G	T	standard	0.814	recommended
538711025	Affx-1250240363	AX-585264708	ATACCTGGAGGCGGTAATGATAGTGATCAGTGTTG[C/T]ACTGTGATTCATGATTAAATTGAGCGACAGAAGAA	Y	2	1	2	1	10186	r		218	mosquito (Aedes albopictus)	chr2.182_2497766	chr2.182	2497766	T	C	standard	0.814	recommended
537423789	Affx-1249721499	AX-583986484	ATTACATTGACTATTATGATAATGTATCATTCAAA[A/G]TAATTGCACAAAAGTCTTATCTTCTAATTCAATTT	R	2	1	2	1	10186	f		218	mosquito (Aedes albopictus)	chr1.85_2565282	chr1.85	2565282	A	G	standard	0.814	recommended
532911045	Affx-1250508196	AX-579529370	CTGTCACATACTAAGAGTGAAATCGGTCGATAAGA[A/G]TTATGATCTGTAGCATCCTTTCCTGGTTTAAGAAT	R	2	1	2	1	10186	r		218	mosquito (Aedes albopictus)	chr2.27_2138256	chr2.27	2138256	A	G	standard	0.814	recommended
534018371	Affx-1251021097	AX-580630480	CTGACATCTTGATCATTCTTACCTTCTAAAACAAT[C/T]TCCTCGCATTTTTTGCTGATGTCTCCTTCGATTTT	Y	2	1	2	1	10186	f		218	mosquito (Aedes albopictus)	chr3.136_1000038	chr3.136	1000038	T	C	standard	0.814	recommended
532822487	Affx-1250463954	AX-579440843	TGGAACAAGCTATTCATTGTGCTAATCTACTGAAA[C/T]TGTTCTTATTATGGCTACACTTGACTTTTCATTTT	Y	2	1	2	1	10186	r		218	mosquito (Aedes albopictus)	chr2.206_46216	chr2.206	46216	C	T	standard	0.814	recommended
536731409	Affx-1249373698	AX-583296785	ACCATGTCGGCAATCACCATAGAGTGCACGCTTAA[A/G]TTTTAAGTAGTTTCTATATCACAGACGGAAGCGCG	R	2	1	2	1	10186	r		218	mosquito (Aedes albopictus)	chr1.138_295367	chr1.138	295367	G	A	standard	0.814	recommended
536785031	Affx-1249400550	AX-583350307	TTTCACGTTTGGTATGTTTTCACCAATCGCGTACT[G/T]TTTATTGGTAGAGTATGACTGTGAATGGTAAGGAA	K	2	1	2	1	10186	r		218	mosquito (Aedes albopictus)	chr1.14_598132	chr1.14	598132	T	G	standard	0.814	recommended
537545386	Affx-1249780445	AX-584107660	TTCTGTACATAGGTCTTTAGAAGGAATTTGAAGCA[A/T]AGGTTTTTATCCCAAAAATAAAGGCTAATTAACCT	W	4	1	2	1	10186	r		218	mosquito (Aedes albopictus)	chr1.90_141840	chr1.90	141840	T	A	standard	0.814	recommended
537732564	Affx-1249875557	AX-584294243	ACAACCTAGTACAGCCGTCAACGAAACAGAAGATG[A/G]AAAAAGCACAGCGCTTCATTTTATAGTTGCTTTTA	R	2	1	2	1	10186	f		218	mosquito (Aedes albopictus)	chr2.100_1680296	chr2.100	1680296	G	A	standard	0.814	recommended
533436303	Affx-1250770382	AX-580054309	TACAGTTCGCCATAACCCCAAACCAAAGACGAATA[A/C]TTTATTTTCGCCCTGTATATCAAATGATCTTGACT	M	2	1	2	1	10186	r		218	mosquito (Aedes albopictus)	chr2.87_8318295	chr2.87	8318295	C	A	standard	0.814	recommended
536115181	Affx-1249066288	AX-582682391	CTATTCCATCTGGCGTTGGTATATGCAAAAAGTCA[G/T]AGTAACTGCCACGTGTTGCACATTGTTTATTGTAT	K	2	1	2	1	10186	f		218	mosquito (Aedes albopictus)	chr3.75_2417609	chr3.75	2417609	G	T	standard	0.814	recommended
537482814	Affx-1249749061	AX-584045280	ACATTCTTCGGCAGCTTTCCTAGAGTAATTCATTA[C/T]ATTTTATAAGACGTATTCTGGTTGCATCACTCAAA	Y	2	1	2	1	10186	r		218	mosquito (Aedes albopictus)	chr1.85_17168190	chr1.85	17168190	C	T	standard	0.814	recommended
535682649	Affx-1248880568	AX-582260361	CACGAAACTTATTAAATTTAGAACCAAAACGCAAA[A/G]CAAGCTGCTGCGCTGCTGTGAATGAAATCTTCAAA	R	2	1	2	1	10186	f		218	mosquito (Aedes albopictus)	chr3.7_3162430	chr3.7	3162430	G	A	standard	0.814	recommended
535527533	Affx-1248831114	AX-582108212	GTGAAATGTAGACACGACCGCACAACATGTTTTTC[C/T]GTTACGCGTCAATTTCACAATCAAATCGTTTTGAA	Y	2	1	2	1	10186	r		218	mosquito (Aedes albopictus)	chr3.64_562625	chr3.64	562625	T	C	standard	0.814	recommended
537105220	Affx-1249562122	AX-583669478	ATCTCGAAAAATCCTAATCCATAGGTATGAAGATC[A/G]ACGAACGGCACATTGTATCGATCAGCCAGTCGGGG	R	2	1	2	1	10186	f		218	mosquito (Aedes albopictus)	chr1.36_128950	chr1.36	128950	A	G	standard	0.814	recommended
536586841	Affx-1249301360	AX-583152760	GACTACTCCACCGGGCCCAATCCGGACTTCATCGA[A/G]TTGATGAAGTGCCACCGGGACATTTGCAGTACCTT	R	2	1	2	1	10186	r		218	mosquito (Aedes albopictus)	chr1.113_5908304	chr1.113	5908304	G	A	standard	0.814	recommended
535036211	Affx-1251379657	AX-581622935	ATATATCTGACTTAGGGGTATGTTTCTTTAATGTA[A/T]ACTGTATGTGTGTATGGTTCATATTTTAAGGGGTA	W	4	1	2	1	10186	f		218	mosquito (Aedes albopictus)	chr3.20_11779712	chr3.20	11779712	T	A	standard	0.814	recommended
536272567	Affx-1249144306	AX-582839447	ATTGCTGAATAAAAATGTAACAAAAATATGTGTTC[A/T]CTTGTTTTACAAATTTGATGACCATCACACATTGA	W	4	1	2	1	10186	r		218	mosquito (Aedes albopictus)	chr3.77_7990783	chr3.77	7990783	A	T	standard	0.814	recommended
533184515	Affx-1250644634	AX-579802684	CGGTAAAGCTGCGCGGTTCAAATTTGGCGTGCTGT[A/T]ATTAAAAACAATTCCGTTTTGTTTCCAGAAGTGCG	W	4	1	2	1	10186	r		218	mosquito (Aedes albopictus)	chr2.60_14040729	chr2.60	14040729	T	A	standard	0.814	recommended
537711492	Affx-1249864965	AX-584273288	CAAGGTACTCAAGCAAATGACATACCGTAAAAGTC[A/G]TACGAGTCCAGAAGACACAGCTGAGAATCACGATA	R	2	1	2	1	10186	f		218	mosquito (Aedes albopictus)	chr1.92_1943037	chr1.92	1943037	G	A	standard	0.814	recommended
537298748	Affx-1249659115	AX-583862109	CACGCGAACTCGCGGATTGACCGTTCCCTAATAAC[A/C]TCAGTAGCGAAAAGACCGAAAAGAGAGTTTTGAAG	M	2	1	2	1	10186	f		218	mosquito (Aedes albopictus)	chr1.67_10255217	chr1.67	10255217	A	C	standard	0.814	recommended
537499025	Affx-1249757232	AX-584061434	CACACACAATGAACCACAACAGGAAGCAAAAATTT[C/T]CTTACCTTCAGCGGAAAGTATTTCGCCAATTTTTC	Y	2	1	2	1	10186	r		218	mosquito (Aedes albopictus)	chr1.85_20680777	chr1.85	20680777	T	C	standard	0.814	recommended
533663185	Affx-1250875786	AX-580280282	TGGAGTCAAGCTTACACAATAACTTTGATGTATGT[A/T]TATCAAAATATTTCCTTCCCTCATTTGGGACACTC	W	4	1	2	1	10186	r		218	mosquito (Aedes albopictus)	chr2.97_10660570	chr2.97	10660570	A	T	standard	0.814	recommended
536784729	Affx-1249401370	AX-583350005	TGGTACCTCCGAAGGATCTGTATCGATTGAGAAAT[A/G]AAAAACGGATTAGATTTTCCTGTGGCTACGAATTG	R	2	1	2	1	10186	f		218	mosquito (Aedes albopictus)	chr1.14_773144	chr1.14	773144	G	A	standard	0.814	recommended
533516602	Affx-1250811698	AX-580134542	TGAAGCTGTCCGACATACGATTACTGAACCATGAA[A/C]ACGAGCTGTCATGGACGCATTTCTCAATGGATCCC	M	2	1	2	1	10186	f		218	mosquito (Aedes albopictus)	chr2.87_24824532	chr2.87	24824532	A	C	standard	0.814	recommended
538848409	Affx-1250377769	AX-585401713	CTGGTTTATTGAAATGCTAGGAGTTCTTGCAGTAT[C/T]ATTTGATGCTTTTTCAACGCAACTTCAAACAGATT	Y	2	1	2	1	10186	r		218	mosquito (Aedes albopictus)	chr2.196_657223	chr2.196	657223	C	T	standard	0.814	recommended
534281951	Affx-1251121167	AX-580885745	AGAATTTTGAGTTCGACATGGAGAAAATGATCAAT[C/T]TAATCAAGTCTTTGCAGAGCCAGGGTTGAGCGTTA	Y	2	1	2	1	10186	f		218	mosquito (Aedes albopictus)	chr3.151_10885812	chr3.151	10885812	C	T	standard	0.814	recommended
536774774	Affx-1249395386	AX-583340081	AATCCACCTCTACAATATTGCAACTCCAACTACTG[A/G]ACTTCGTTGTCTCCGTAGACCATGGAAAAACGCCC	R	2	1	2	1	10186	r		218	mosquito (Aedes albopictus)	chr1.139_9919361	chr1.139	9919361	A	G	standard	0.814	recommended
536767471	Affx-1249392838	AX-583332799	GTATACATATACACGCATTAATAAACGCATAAACT[A/G]CTTATAAAGATTTAAAACCAAGTAGATATGGTGCA	R	2	1	2	1	10186	f		218	mosquito (Aedes albopictus)	chr1.139_8564583	chr1.139	8564583	A	G	standard	0.814	recommended
533573639	Affx-1250840143	AX-580191517	TATTTTTTTCTCATATTTATATGAAGGTAGATAAG[A/T]TGATTTTTCATGTTAAATTACATGTAGAAATGTTG	W	4	1	2	1	10186	f		218	mosquito (Aedes albopictus)	chr2.95_765920	chr2.95	765920	A	T	standard	0.814	recommended
535858507	Affx-1248945611	AX-582430328	CATCTGGAATGTGCCGAAATAAGCGACCCCAACGA[C/T]TATGTTTGCTCCAAATGTATGGATGCCACGTTTAT	Y	2	1	2	1	10186	r		218	mosquito (Aedes albopictus)	chr2.17_12093478	chr2.17	12093478	C	T	standard	0.814	recommended
535392007	Affx-1251510762	AX-581974868	GCGCTTGGCGTCGCACCAACGAAACAGTACCTCCA[A/T]ACTTTGGCTTTAACGTGTGCACTTAGAGGATTTTT	W	4	1	2	1	10186	r		218	mosquito (Aedes albopictus)	chr3.49_6843043	chr3.49	6843043	T	A	standard	0.814	recommended
533835436	Affx-1250944699	AX-580450279	CAACCTCACTATTAAACTATATGGCACACCCACAA[A/T]CTACCCCATCGCCGTCGTCGTCGTCGTCGTCGTCG	W	4	1	2	1	10186	f		218	mosquito (Aedes albopictus)	chr3.111_1722036	chr3.111	1722036	T	A	standard	0.814	recommended
533598150	Affx-1250852389	AX-580215975	TTCTTGTAATAAATCTAGCAGTAAGGATAGATGAT[A/G]AAAACATCAGCCTGATGCAATACACACCAAATGCC	R	2	1	2	1	10186	f		218	mosquito (Aedes albopictus)	chr2.97_834064	chr2.97	834064	G	A	standard	0.814	recommended
533183879	Affx-1250644310	AX-579802048	TTTGAAAAAGCATTAAAACATACTTGTAAGGAAAT[C/T]TTCAGACACTTGTTGGGTGTATATTTCTCCTTGCT	Y	2	1	2	1	10186	r		218	mosquito (Aedes albopictus)	chr2.60_13996604	chr2.60	13996604	C	T	standard	0.814	recommended
538806124	Affx-1250335474	AX-585359588	ACCACCACCTACACAGCCCACGGAATTGGAGCCTG[C/T]ACATTCTCTTTACCCTGGTAATTGTTTAACACTAG	Y	2	1	2	1	10186	r		218	mosquito (Aedes albopictus)	chr2.186_28114474	chr2.186	28114474	C	T	standard	0.814	recommended
537776650	Affx-1249897655	AX-584338183	GATCCTTTTTATTGGAAGTAAGAAACGCTTACAAT[C/T]TATATCTTTTTAGTGTTTCCAAGCCGGTTGGACGC	Y	2	1	2	1	10186	f		218	mosquito (Aedes albopictus)	chr2.103_3907971	chr2.103	3907971	C	T	standard	0.814	recommended
537119265	Affx-1249567265	AX-583683488	AAGCAATCGATAATCCGAATTTTTCTTATTTCTGG[A/T]ATTAGGTCGATATAGAAGACTTTCTTTCCTTCGCC	W	4	1	2	1	10186	r		218	mosquito (Aedes albopictus)	chr1.36_2649180	chr1.36	2649180	A	T	standard	0.814	recommended
538638946	Affx-1250168276	AX-585192853	AGACCAGAGCATAAAGCATGGCCGACGTGATCGTT[C/T]GTTATGTACTGCTGCAAACTGAGTGACTGATGAAA	Y	2	1	2	1	10186	r		218	mosquito (Aedes albopictus)	chr2.17_4474241	chr2.17	4474241	T	C	standard	0.814	recommended
533263986	Affx-1250685524	AX-579882127	TCCAAAACCTTTCAGCATCAACATTGCAATTTAAC[A/G]AAAACAAATATTGATTCAGAAAGTGATTAAAACTA	R	2	1	2	1	10186	f		218	mosquito (Aedes albopictus)	chr2.68_2956770	chr2.68	2956770	G	A	standard	0.814	recommended
535616464	Affx-1248858695	AX-582195414	AACCCTACTAATCTTGCAGTTCAGTTTCGAAAATA[A/T]ACATCCCAAATTTTAAGTGGAGAAAAGATACAAAG	W	4	1	2	1	10186	r		218	mosquito (Aedes albopictus)	chr3.69_4315044	chr3.69	4315044	T	A	standard	0.814	recommended
536169004	Affx-1249093164	AX-582736102	AAATTGGATTCAATGGTTCACCATTGCACTACTAG[A/G]AAATTTTGCCTCGGGAGCAATGAAAACGACATAAA	R	2	1	2	1	10186	f		218	mosquito (Aedes albopictus)	chr3.75_12048917	chr3.75	12048917	A	G	standard	0.814	recommended
535134193	Affx-1251417559	AX-581719987	CTGTCGTCGATCCTTTATTATGTTCATCGATAAAA[A/C]CGACAAAGGCTTCCCTCGAGACGGGTTGACACACC	M	2	1	2	1	10186	f		218	mosquito (Aedes albopictus)	chr3.29_3083978	chr3.29	3083978	C	A	standard	0.814	recommended
537257826	Affx-1249636458	AX-583821465	CTATTGTCCGGTAGCTGAGGTTCGTTGGACAATTT[C/T]TTTAGATCTGATGAAGATTCCCGGGATTGGTTGGG	Y	2	1	2	1	10186	r		218	mosquito (Aedes albopictus)	chr1.59_1162910	chr1.59	1162910	T	C	standard	0.814	recommended
533392765	Affx-1250749935	AX-580010810	TTTTTACTGCTGTTGTTTGGATTATGTTTAAATCG[A/T]TAGAAGATATTCTGTCCAGACGTCCCTTTAGAAAA	W	4	1	2	1	10186	f		218	mosquito (Aedes albopictus)	chr2.87_480583	chr2.87	480583	T	A	standard	0.814	recommended
535615531	Affx-1248858053	AX-582194493	ACATAGGTGTTGAAAGGAAACATGCCTACAATGAA[A/T]GAAAGTGGCACGCGAACGCCGTATGCAGCATGGAA	W	4	1	2	1	10186	f		218	mosquito (Aedes albopictus)	chr3.69_4067166	chr3.69	4067166	A	T	standard	0.814	recommended
535472468	Affx-1248813030	AX-582054237	AGTGACTAACAATCGGTCCTTCGCCGCGGATTAAA[A/G]CTGACGATCTAGTTTAGGTGATCAGAAATCTCCTG	R	2	1	2	1	10186	f		218	mosquito (Aedes albopictus)	chr3.58_5479413	chr3.58	5479413	G	A	standard	0.814	recommended
533539498	Affx-1250822030	AX-580157416	AACGGTCACCTTTTTAAAAAAAATTAAGAAGTTTG[A/G]GTTGAAGTTTTATAAGCCAGAAGAAGAAAGAATTG	R	2	1	2	1	10186	r		218	mosquito (Aedes albopictus)	chr2.87_29966756	chr2.87	29966756	A	G	standard	0.814	recommended
536787713	Affx-1249402896	AX-583352986	TAGTACAGCAAATTAATTTTCTTCTAGTCACTCAA[A/T]CAAAATGATACTGATCTAATAAATTAATTCCATCT	W	4	1	2	1	10186	f		218	mosquito (Aedes albopictus)	chr1.14_1210314	chr1.14	1210314	T	A	standard	0.814	recommended
536104221	Affx-1249060251	AX-582671447	TTGTATGTACCTCGCGTATGTACCCACTTCCTGAT[C/T]GGTTCACTCCTAATTTACTGGTATATAATTTGTGT	Y	2	1	2	1	10188	r		218	mosquito (Aedes albopictus)	chr3.75_639805	chr3.75	639805	C	T	standard	0.812	recommended
535344966	Affx-1251494027	AX-581928322	CGATCGCAAGTACTGGAACTTGTCAAAAGTATCAG[A/G]AAATCGCGAGCAGTTAGCCCAACAACTCCTCATTA	R	2	1	2	1	10188	f		218	mosquito (Aedes albopictus)	chr3.46_556181	chr3.46	556181	A	G	standard	0.812	recommended
535920740	Affx-1248972436	AX-582491801	TGGACAGCTGACAGACAAACGGGCAACAATATTTG[C/T]TTTACATAGGTACATCAACAATATGACACACTGCT	Y	2	1	2	1	10188	r		218	mosquito (Aedes albopictus)	chr2.17_22438083	chr2.17	22438083	T	C	standard	0.812	recommended
536901581	Affx-1249458723	AX-583466577	GATCAGTGTGGTTTCTAAGAACACATTATCAATAG[C/T]TTCGTTATGAAAGATGCAAATTATTGAAAAAGCAA	Y	2	1	2	1	10188	r		218	mosquito (Aedes albopictus)	chr1.149_1960262	chr1.149	1960262	T	C	standard	0.812	recommended
533765905	Affx-1250917271	AX-580381337	GTTACAACGCTCGAAGGAGTCGCATCGGAACTCGC[A/T]ATCTTTTCGTTTCTCAACATCAAAAGGATCGTGTT	W	4	1	2	1	10188	r		218	mosquito (Aedes albopictus)	chr3.1_11215295	chr3.1	11215295	A	T	standard	0.812	recommended
534967736	Affx-1251352270	AX-581554894	GCTATTCGAGTGGGTTCTTCCAATAACAAAGAATA[A/C]TCTACATTTGTAAGATGAACTTTGATCATCGTCGA	M	2	1	2	1	10188	f		218	mosquito (Aedes albopictus)	chr3.20_1995806	chr3.20	1995806	C	A	standard	0.812	recommended
533396503	Affx-1250751840	AX-580014546	AAGTAGATCGGATTTCTTCTCCACTGCGATGTAGA[A/T]GTAGTTTCTTTGCTTGGTACGAGAATTTGGAACAC	W	4	1	2	1	10188	f		218	mosquito (Aedes albopictus)	chr2.87_956995	chr2.87	956995	T	A	standard	0.812	recommended
538897906	Affx-1250427280	AX-585451045	TCCGCCTGCTCATGCTTCTGTTGCAGCTGCTGCTG[C/T]TGCTGACCCTTCTTAACGATGGCACTTTTATCGTC	Y	2	1	2	1	10188	r		218	mosquito (Aedes albopictus)	chr2.198_4886524	chr2.198	4886524	T	C	standard	0.812	recommended
537737900	Affx-1249877040	AX-584299568	GAGACCGGTTTGTCGTTTGCTCTTTTCCATCTTTT[G/T]TATCGTCTACTACTAAGCACAATCAATTTTAAAAT	K	2	1	2	1	10188	r		218	mosquito (Aedes albopictus)	chr2.100_2380117	chr2.100	2380117	G	T	standard	0.812	recommended
534661968	Affx-1251242134	AX-581255875	CTCATAATCGAAGCAACCATGCGTACGAAACGAAA[A/G]TAAAAATGAAAACTCAAACGTATCTTCCTCGTATC	R	2	1	2	1	10188	f		218	mosquito (Aedes albopictus)	chr3.170_4488350	chr3.170	4488350	A	G	standard	0.812	recommended
538535420	Affx-1250064714	AX-585089816	CTCTATTTTCTTACTGCGACAAAGACGAAGAACAC[A/T]TACATTTTTCTCCACGTAGAATATAATCACAACCT	W	4	1	2	1	10188	r		218	mosquito (Aedes albopictus)	chr2.149_116217	chr2.149	116217	T	A	standard	0.812	recommended
537030407	Affx-1249524658	AX-583594971	GAGAACCTTTGAAAGCGTTCTATTTCTATCGAATC[C/T]AGTACAAAAACATAAATAAACTACGCTTGTTTTTG	Y	2	1	2	1	10188	f		218	mosquito (Aedes albopictus)	chr1.25_2552337	chr1.25	2552337	C	T	standard	0.812	recommended
536620605	Affx-1249319348	AX-583186375	AGTGTCTTCAAACATTCATCTATTTCCTCAAATAC[A/C]ATTAACTCCATTTGTTCTATTTTTAACGGTTTACT	M	2	1	2	1	10188	f		218	mosquito (Aedes albopictus)	chr1.120_1274351	chr1.120	1274351	C	A	standard	0.812	recommended
537701741	Affx-1249860031	AX-584263569	TTACGACCTACCGAGGTACGAACGAATTTGACTAG[C/T]TAAGTAAAATGAAATCCAGTTTCTTTTGGCATCTA	Y	2	1	2	1	10188	f		218	mosquito (Aedes albopictus)	chr1.92_51063	chr1.92	51063	C	T	standard	0.812	recommended
537199520	Affx-1249609377	AX-583763380	AGTTACAAGAATTTGATTCGATTTATTAGGCTCTT[A/T]GAGAATTGGACTAATACAGGTACCCAATCATCTCG	W	4	1	2	1	10188	f		218	mosquito (Aedes albopictus)	chr1.50_5767833	chr1.50	5767833	T	A	standard	0.812	recommended
536162172	Affx-1249089792	AX-582729283	AAAATGAATTCATTTGAAAGCTGAGTAGAAGCTCA[A/T]CTTCCACTCCCTCCTCTTTCCGGTTCGGGTAAGTT	W	4	1	2	1	10188	f		218	mosquito (Aedes albopictus)	chr3.75_10682320	chr3.75	10682320	T	A	standard	0.812	recommended
538649294	Affx-1250178628	AX-585203174	TTTGGCTTTTCACCGGCGAGAAACCCCTCCGGATT[A/G]GTTACGTTAAATATATACACCTTAGTTAACCTAGT	R	2	1	2	1	10188	r		218	mosquito (Aedes albopictus)	chr2.17_7838324	chr2.17	7838324	A	G	standard	0.812	recommended
537935371	Affx-1249979671	AX-584496398	AATATATTTCGTTCAAAGTGACAGAGTAGCGAATC[A/G]GAAGAATAAGGGCGTGTAAATCGTAATTTTTAATA	R	2	1	2	1	10188	f		218	mosquito (Aedes albopictus)	chr2.125_505554	chr2.125	505554	G	A	standard	0.812	recommended
533574948	Affx-1250840804	AX-580192826	CCTTGTTGTTTCTGTGTTTCGAACCTAAGTAATCT[A/G]AACTTTGTTTTCTTCGCGGGCATTTTTTTTTTGTT	R	2	1	2	1	10188	f		218	mosquito (Aedes albopictus)	chr2.95_1477638	chr2.95	1477638	G	A	standard	0.812	recommended
537873113	Affx-1249945910	AX-584434374	CATAATTTGCTACACATCTTGTAATCTTATTAAAG[A/G]ATTAAACAGATTTTCAATCAATGCCAAAGATATCA	R	2	1	2	1	10188	f		218	mosquito (Aedes albopictus)	chr2.118_1843280	chr2.118	1843280	G	A	standard	0.812	recommended
537530840	Affx-1249775001	AX-584093191	TTTTTTCATTAACCTCAACAAAAGGGTGTCACATA[A/G]AAACACTAAATACATGTTAACAACTACCTTAAATC	R	2	1	2	1	10188	f		218	mosquito (Aedes albopictus)	chr1.85_27463281	chr1.85	27463281	A	G	standard	0.812	recommended
537741349	Affx-1249879962	AX-584303003	TTTGCACAGCATCAACTTAAATTAGATGATGTAGA[A/C]ACTGATAAGGATGCAGTAATTGAAAATCTATCAAA	M	2	1	2	1	10188	f		218	mosquito (Aedes albopictus)	chr2.101_255155	chr2.101	255155	A	C	standard	0.812	recommended
533244392	Affx-1250674462	AX-579862543	GCTAGAAGAGGAGGATATTACATTTCCTACACAAG[C/T]TTACTGCCTAGTTTTAACCAATATTCGATCAATAG	Y	2	1	2	1	10188	r		218	mosquito (Aedes albopictus)	chr2.66_415007	chr2.66	415007	C	T	standard	0.812	recommended
537894953	Affx-1249955503	AX-584456146	CTTGAAAGATTGTAATGGAATTTTGACAATGAGAA[C/T]ATTGCACTATTAGCTAATTTCAGTCAAAACTTCAT	Y	2	1	2	1	10188	r		218	mosquito (Aedes albopictus)	chr2.121_390542	chr2.121	390542	T	C	standard	0.812	recommended
535888717	Affx-1248957757	AX-582460055	TCTGCTCGAAGCCGCACAAGTGTTAGATGGAGCAG[C/T]ATTCTTATGCACCTCGGAATGGCAGTGAAAATGAG	Y	2	1	2	1	10188	r		218	mosquito (Aedes albopictus)	chr2.17_16434241	chr2.17	16434241	C	T	standard	0.812	recommended
535990659	Affx-1249003861	AX-582558133	CTGTTCTGTTATTCTAATTGGGTGTAATTCTCATA[A/T]TAGGTATCAGTAGTAGTCTCAACACTAGCTGACGC	W	4	1	2	1	10188	f		218	mosquito (Aedes albopictus)	chr2.17_35453437	chr2.17	35453437	A	T	standard	0.812	recommended
537392011	Affx-1249705605	AX-583954866	GCGGATTAGCCGATTAACGCGAAATTCACTTAAGA[C/T]TAATCCTCGGCAAGTGATTTCGGCGGGGAATCGCA	Y	2	1	2	1	10188	f		218	mosquito (Aedes albopictus)	chr1.74_4530608	chr1.74	4530608	C	T	standard	0.812	recommended
537985232	Affx-1250029546	AX-584546092	TCAGTCAGTTAAATGAAGCAAGGTCGGTAATAAAA[A/G]AGGGTTTTCAAAAAACAAAAATTAACAAACCAGTG	R	2	1	2	1	10188	f		218	mosquito (Aedes albopictus)	chr2.140_9934098	chr2.140	9934098	G	A	standard	0.812	recommended
535102057	Affx-1251407417	AX-581688246	ATTATCTTGCACATTATGATTCTTACAAACATCTA[A/G]CTTATTCTTACAAACATCTAACTAAAATGAAGCTT	R	2	1	2	1	10188	r		218	mosquito (Aedes albopictus)	chr3.28_3649578	chr3.28	3649578	A	G	standard	0.812	recommended
538723541	Affx-1250252881	AX-585277178	AGATCTTGTAGGTCATTCTTGGAATACCACGCGGG[A/C]TTTAGAGGAAATCAGTATATAGTGGGTCATTGGAG	M	2	1	2	1	10188	r		218	mosquito (Aedes albopictus)	chr2.186_862942	chr2.186	862942	C	A	standard	0.812	recommended
535586738	Affx-1248848827	AX-582166191	ATGCAGCTGGATCAGTCAAAAATATGCCGACATGA[G/T]ATTGAAAAATTAATGAAAATCTGGTTGAAGATTTG	K	2	1	2	1	10188	f		218	mosquito (Aedes albopictus)	chr3.67_459565	chr3.67	459565	T	G	standard	0.812	recommended
538343042	Affx-1250387432	AX-584902758	CATACAATTTAGGAATTACATATCAGTACCGAAAC[C/T]GAAATGAACGCCCCGTCTCACCGCCTTGTTCCATT	Y	2	1	2	1	10188	f		218	mosquito (Aedes albopictus)	chr2.196_3771752	chr2.196	3771752	C	T	standard	0.812	recommended
534219502	Affx-1251097102	AX-580824932	TTTGAGGAAAAGTATATTGCCGTCAATGGAAATAA[A/G]TCCTTTACTTCCACCTTCACCTCGAATACGCCTGG	R	2	1	2	1	10188	f		218	mosquito (Aedes albopictus)	chr3.151_1373240	chr3.151	1373240	A	G	standard	0.812	recommended
533794240	Affx-1250928914	AX-580409114	AACCAGATTGCCCTAGCGGAAGTTTTCTTCCTTAT[A/T]TGAGTTATTGTGTAGAGGTTGAACTCTGAGGTCAA	W	4	1	2	1	10188	r		218	mosquito (Aedes albopictus)	chr3.109_2646644	chr3.109	2646644	T	A	standard	0.812	recommended
534710642	Affx-1251260100	AX-581303813	TCAACGACGTTTATTATTTGTTTAGAATTCTGAAT[A/C]ATTTTTCAAGACTGATTCAGGCGTATTTTTGTTTA	M	2	1	2	1	10188	r		218	mosquito (Aedes albopictus)	chr3.170_12671387	chr3.170	12671387	C	A	standard	0.812	recommended
533448498	Affx-1250777736	AX-580066491	CGGAGAAAGTTTATTTACTTTTGGAAGTAGATGAT[A/C]AAAAGAATCAAAACCAGGTAAGTATCCTTTGAAAT	M	2	1	2	1	10188	f		218	mosquito (Aedes albopictus)	chr2.87_11755605	chr2.87	11755605	C	A	standard	0.812	recommended
537954240	Affx-1249998543	AX-584515236	GAAAGTGACAGCTTTTTATGATGCAGTGAGTAAAT[A/G]TCAAACTTAAGCAAAAAAATGCCGAGTGATTATTT	R	2	1	2	1	10188	f		218	mosquito (Aedes albopictus)	chr2.125_7386412	chr2.125	7386412	G	A	standard	0.812	recommended
538760918	Affx-1250290262	AX-585314489	GCCCCAACAGCTCTCGAGCAAACCCTTTACGGCGA[A/T]ATGCTAGTTCTTCGCTAGCTGAAACATTCATTGTT	W	4	1	2	1	10188	r		218	mosquito (Aedes albopictus)	chr2.186_14305112	chr2.186	14305112	T	A	standard	0.812	recommended
534052567	Affx-1251037927	AX-580664635	TAATTGGTTGTTTCTCGAATATCGCTCAATTAGAA[A/G]TACCCATACAATGTTTCCAACCCAGTTAACTTATC	R	2	1	2	1	10188	f		218	mosquito (Aedes albopictus)	chr3.136_7921781	chr3.136	7921781	A	G	standard	0.812	recommended
538627424	Affx-1250156752	AX-585181353	TTGGAATCGCATTCGTCCGAGCGTGATAGATTGGA[A/G]TTGATTACTGGAGCTTTGCAGAAATACAGAGCCGT	R	2	1	2	1	10188	r		218	mosquito (Aedes albopictus)	chr2.17_446836	chr2.17	446836	G	A	standard	0.812	recommended
537527138	Affx-1249773135	AX-584089501	AAGAATTTATCTAGACATTCCAGACAATTCTACCA[A/G]GAAATCGTTCGAGGACTTGCCTATAATTCACCCAT	R	2	1	2	1	10188	f		218	mosquito (Aedes albopictus)	chr1.85_26907540	chr1.85	26907540	G	A	standard	0.812	recommended
538300459	Affx-1250344841	AX-584860297	TTGGACTAATACCTTCTCATTTCTAGATCGATCAT[C/T]ACCCAATCCATCCTGCTGGTGGTCAACTGCGTGGT	Y	2	1	2	1	10188	f		218	mosquito (Aedes albopictus)	chr2.187_94610	chr2.187	94610	T	C	standard	0.812	recommended
532874039	Affx-1250490340	AX-579492368	TAGTTTCTCTACCCATCACAAGTTAAGATCAAACT[A/G]AAAAGATCTGGGTTTGTTTTTACATGAACGAACAT	R	2	1	2	1	10188	f		218	mosquito (Aedes albopictus)	chr2.22_9746718	chr2.22	9746718	G	A	standard	0.812	recommended
536809129	Affx-1249412510	AX-583374351	CCCACAGTAACGCCCACTCGTAACCGTAAGCAAAG[A/T]TGATACTATTTTCAGCGTGCAATTAATCACGCTCA	W	4	1	2	1	10188	r		218	mosquito (Aedes albopictus)	chr1.144_2873283	chr1.144	2873283	A	T	standard	0.812	recommended
537885912	Affx-1249950974	AX-584447144	CAAGCTCAAGCATCATTAACCGCCGCTGTTGGTTG[A/T]ACTTGCCGATTAGTTATTCCATGATCGGTCTTAGA	W	4	1	2	1	10188	r		218	mosquito (Aedes albopictus)	chr2.118_3689823	chr2.118	3689823	A	T	standard	0.812	recommended
536834770	Affx-1249426467	AX-583399915	GAGTGAAAATGAGAGCCCGGAAAAACAGAGACGTA[A/G]TTCTACGTCAAAGTCCTATGAAAGGGGATTCGATG	R	2	1	2	1	10188	f		218	mosquito (Aedes albopictus)	chr1.144_11932617	chr1.144	11932617	G	A	standard	0.812	recommended
537864259	Affx-1249941464	AX-584425574	GGATTCCGGAAATACAATTCGGATTTTAAGCTTTT[A/G]AACGAAGCAAAACACCGAAAAACATTGGCGAAAAA	R	2	1	2	1	10188	f		218	mosquito (Aedes albopictus)	chr2.107_8172690	chr2.107	8172690	A	G	standard	0.812	recommended
534720001	Affx-1251262089	AX-581310996	CCGTAAGAATTTTATACATCTCTTATTGAGATGAT[A/G]AAATACAGATTGTAGAACTGAAGAATCATACAACA	R	2	1	2	1	10188	f		218	mosquito (Aedes albopictus)	chr3.170_13404046	chr3.170	13404046	G	A	standard	0.812	recommended
537368102	Affx-1249693637	AX-583931214	CACACATATATTCTCTTACACATTCTCGGCATATC[C/T]CATTGGAAGATTTTTTGGCAACTTACGAATGACAT	Y	2	1	2	1	10188	f		218	mosquito (Aedes albopictus)	chr1.7_14891397	chr1.7	14891397	T	C	standard	0.812	recommended
534645739	Affx-1251237435	AX-581239916	ACGAAAACAATCTTGCGACGTCACAAGACTCGTAA[A/G]CAAAGCAAGCCAAGCTTTCTCGTTACAATGAAATT	R	2	1	2	1	10188	f		218	mosquito (Aedes albopictus)	chr3.170_2980887	chr3.170	2980887	G	A	standard	0.812	recommended
537813245	Affx-1249914753	AX-584374721	TCGCTCAGTCTCTTATCGTAATTGTAGCGATTATC[A/G]TTTACCTCAATGGTACGGTTGTCTACGTACTTACT	R	2	1	2	1	10188	r		218	mosquito (Aedes albopictus)	chr2.103_8627541	chr2.103	8627541	G	A	standard	0.812	recommended
533345888	Affx-1250725162	AX-579963960	AAATCTCAAAAAATAATCACAGATTGAAATCTTAG[A/G]AGTATACATATGATTAGAAAAGGCTTGTGGAATAT	R	2	1	2	1	10188	r		218	mosquito (Aedes albopictus)	chr2.82_14989357	chr2.82	14989357	G	A	standard	0.812	recommended
538791378	Affx-1250320726	AX-585344879	TATCTAGAGCAATTCAAGTAACTGCGAATGGTTTA[A/G]TTTGAAGTATCTTGAATCATATTTATTAGGCAAAA	R	2	1	2	1	10188	r		218	mosquito (Aedes albopictus)	chr2.186_24075058	chr2.186	24075058	G	A	standard	0.812	recommended
533307932	Affx-1250706163	AX-579926028	CCCTGAAACAATTATCCACGACCAGTTAATGGAAG[A/T]TAGAGCTCTTTCAATAGATACCAATGGAATACAAC	W	4	1	2	1	10188	r		218	mosquito (Aedes albopictus)	chr2.82_4922503	chr2.82	4922503	A	T	standard	0.812	recommended
538279960	Affx-1250324338	AX-584839846	TGTCGCAACACGTACGAGCGTGAAATGTTTGACAA[A/G]GCTTCGCTGAAACTGGGCTTGGATAAGGCCATTTT	R	2	1	2	1	10188	f		218	mosquito (Aedes albopictus)	chr2.186_24946597	chr2.186	24946597	A	G	standard	0.812	recommended
534827011	Affx-1251298980	AX-581415943	GGAACAGTTGACGCCTGGTTTAATCAAAGACGATA[A/G]GAAGAAGTTTCGATTCGCATCTAATAAAACAAAAA	R	2	1	2	1	10188	f		218	mosquito (Aedes albopictus)	chr3.180_1657845	chr3.180	1657845	G	A	standard	0.812	recommended
533834628	Affx-1250943448	AX-580449472	CCTTGTATCTTTCAATCTACTTTTTTCTCTCATAT[C/T]TGCATATATAACTTAGTTCATAGCCATCTATAGAA	Y	2	1	2	1	10188	r		218	mosquito (Aedes albopictus)	chr3.111_1294662	chr3.111	1294662	C	T	standard	0.812	recommended
536984170	Affx-1249501339	AX-583548909	AGTAATTAGCCTATTTGTTAAGAGTAAATCATAAA[A/T]TCACTCACAATATCGTTGTTGTTCGTTTGGCGATA	W	4	1	2	1	10188	f		218	mosquito (Aedes albopictus)	chr1.164_305708	chr1.164	305708	A	T	standard	0.812	recommended
533429557	Affx-1250768291	AX-580047575	TTAGAAATTTATCTTTTATCAACAGATTGTTGGAA[A/T]CAAAAACTATGTGTTATGGCATTCAAATTTATGGT	W	4	1	2	1	10188	f		218	mosquito (Aedes albopictus)	chr2.87_7545875	chr2.87	7545875	T	A	standard	0.812	recommended
537037258	Affx-1249526326	AX-583601802	ATTTTGAAATTTTATTCATGTTTCACCTTGTTGAA[A/G]GTTTAATTTCGTTTATGGATGTTTCAAAACAATCA	R	2	1	2	1	10188	r		218	mosquito (Aedes albopictus)	chr1.25_3780215	chr1.25	3780215	A	G	standard	0.812	recommended
535115934	Affx-1251411523	AX-581701932	TCATAAACATTACGTTTTGTGATTTACACGAAACT[A/T]TCATTTCGTACTTTAAAAGGCAAACGACCCAAATA	W	4	1	2	1	10188	f		218	mosquito (Aedes albopictus)	chr3.28_6399083	chr3.28	6399083	A	T	standard	0.812	recommended
533327511	Affx-1250717314	AX-579945596	GTTGGTAAATATACTGCCCATTCACTAACAGCACA[A/G]TAAAGAACTGAGTAAAAGCATTGAAATTTATTGGG	R	2	1	2	1	10188	f		218	mosquito (Aedes albopictus)	chr2.82_11312953	chr2.82	11312953	A	G	standard	0.812	recommended
533433337	Affx-1250768881	AX-580051351	AAATAAACTGCTTGAGGTCTTGGGGTACTTGAGAA[A/G]TGATTGCTTGTGTTGAATCTTAAAGTGATGTATAC	R	2	1	2	1	10188	r		218	mosquito (Aedes albopictus)	chr2.87_7811327	chr2.87	7811327	G	A	standard	0.812	recommended
536429828	Affx-1249223920	AX-582996250	TTCTTTTATTGGCATTCCGTTTCGCATTTGGAAAT[A/G]ATTTATCCCATTTAATTTGATCGACTGTTTGTTTT	R	2	1	2	1	10188	f		218	mosquito (Aedes albopictus)	chr3.93_4443187	chr3.93	4443187	G	A	standard	0.812	recommended
536301776	Affx-1249159778	AX-582868611	AACTCTTTCCTTGCTGGTCATATTAATGTTAAGCA[A/G]ATAGCTCCAGACGCTACTACTGTCGAACTTGGGCA	R	2	1	2	1	10188	f		218	mosquito (Aedes albopictus)	chr3.77_15232690	chr3.77	15232690	A	G	standard	0.812	recommended
537735156	Affx-1249875681	AX-584296831	ATTTAAAGTTTTAAGACTTAATTTAACTTAATTTT[C/T]GTATGTAAATGGCAGAAGACTTCAGCTATTACGTG	Y	2	1	2	1	10188	r		218	mosquito (Aedes albopictus)	chr2.100_1758877	chr2.100	1758877	C	T	standard	0.812	recommended
534774760	Affx-1251281630	AX-581364418	GCTTGAGATTCCAGTTCACACTGTAAAATAGGATA[C/T]GATAAAGTTGAAGAACAACAGAAAACCCAGAAGCA	Y	2	1	2	1	10188	f		218	mosquito (Aedes albopictus)	chr3.176_253412	chr3.176	253412	C	T	standard	0.812	recommended
535225454	Affx-1251451666	AX-581810200	CTTTTCTTCCAATAAAGCCATCGTAATTAAAATCC[C/T]ACCATTCCCGACTCCTCAATACACAGGAGGATACA	Y	2	1	2	1	10188	f		218	mosquito (Aedes albopictus)	chr3.40_2464878	chr3.40	2464878	C	T	standard	0.812	recommended
537251802	Affx-1249633431	AX-583815475	TTGTCGGTAACGGTAATCGACTCGATGGAATGGCT[C/T]ACGTTGCACATTTTCAGCAGCTTCGATAAAAGTAC	Y	2	1	2	1	10188	r		218	mosquito (Aedes albopictus)	chr1.56_498659	chr1.56	498659	C	T	standard	0.812	recommended
537512545	Affx-1249765866	AX-584074931	ACACCCAATTATATCATCTGATCTAAATACCTACA[A/T]TAATCAGTATTATACGGATCGATTGCTTTCTGTGT	W	4	1	2	1	10188	f		218	mosquito (Aedes albopictus)	chr1.85_23566444	chr1.85	23566444	A	T	standard	0.812	recommended
536178977	Affx-1249098177	AX-582746053	ATACCAAATCAGGGTTGGATATTGGGTTATCATAA[A/T]TGAGAATGCTTTCAAAAGTTTTGGACTTCGATTCG	W	4	1	2	1	10188	f		218	mosquito (Aedes albopictus)	chr3.75_13814185	chr3.75	13814185	T	A	standard	0.812	recommended
534996775	Affx-1251364269	AX-581583767	TTGTTACTGCAAAATACTAGGATGTTCTTCAAATA[A/C]ATAATAATTGATAGTCTGCAAGATTGAAAACAACA	M	2	1	2	1	10188	f		218	mosquito (Aedes albopictus)	chr3.20_6717442	chr3.20	6717442	C	A	standard	0.812	recommended
536102072	Affx-1249059199	AX-582669306	CACATTCAACTTGCTTTGGTTTAGGAGGCTATTTA[G/T]TACGTTTGAAGATTTCCAAATACTCATCTCCAAAC	K	2	1	2	1	10188	r		218	mosquito (Aedes albopictus)	chr3.74_6835992	chr3.74	6835992	T	G	standard	0.812	recommended
538705241	Affx-1250234578	AX-585258962	TTCTTATAGATGAATTGGATATTCCATTCAAGTTG[C/T]TCTAATTTCTAATGCACACGATATGACCATATTGA	Y	2	1	2	1	10188	r		218	mosquito (Aedes albopictus)	chr2.179_4432828	chr2.179	4432828	T	C	standard	0.812	recommended
532885482	Affx-1250496079	AX-579503808	ATTACATAAAAGTCTACATAATAGCAAATACCATA[C/T]TCTCTGGGTGTCTCATGCTAAATTTCATTTTCCGG	Y	2	1	2	1	10188	f		218	mosquito (Aedes albopictus)	chr2.22_11956224	chr2.22	11956224	C	T	standard	0.812	recommended
534877281	Affx-1251316485	AX-581465318	TCTCCGTCGCATCGGTGAGTGTGAAACTCTATTTT[A/C]CAGTCACCTCGCCTCGGTCGAAATTGCGGCGTTGA	M	2	1	2	1	10188	f		218	mosquito (Aedes albopictus)	chr3.180_6475497	chr3.180	6475497	C	A	standard	0.812	recommended
536410714	Affx-1249214368	AX-582977164	TCTTCCTAGGGTTATTTTGAGACTCTTAGAAATGA[A/G]CCATTCGAAGTGAACATAACGATATTTTGTCCCGG	R	2	1	2	1	10188	f		218	mosquito (Aedes albopictus)	chr3.93_1396451	chr3.93	1396451	G	A	standard	0.812	recommended
538022314	Affx-1250066641	AX-584582977	GCTTATTATTCCAAATGTTTGATAGTTGTAATCAT[C/T]CGCATAAGTCAACAGAATAAAAACAATCAATATCT	Y	2	1	2	1	10188	f		218	mosquito (Aedes albopictus)	chr2.151_3499471	chr2.151	3499471	T	C	standard	0.812	recommended
538238678	Affx-1250283050	AX-584798667	TTGATTTGTTTATTGCTAAACTAGATCGACGTATA[A/T]ACTCAATCAAACAAAAGCCATCTAGCTATGTAAAG	W	4	1	2	1	10188	f		218	mosquito (Aedes albopictus)	chr2.186_11714935	chr2.186	11714935	A	T	standard	0.812	recommended
533140382	Affx-1250623584	AX-579758579	ACTTTACACAACAACCTTTTTACTAATCGATAACG[A/G]AAGAAGACGGGAGAATGGAAACAGCAATGACGAGC	R	2	1	2	1	10188	f		218	mosquito (Aedes albopictus)	chr2.60_3340505	chr2.60	3340505	G	A	standard	0.812	recommended
537768719	Affx-1249893677	AX-584330264	CAGAACAAAATTACAGACTCGGTGAAACTGTGAAA[A/G]TCAACTTATCAATCAACCACAACGCATGGACACAG	R	2	1	2	1	10188	f		218	mosquito (Aedes albopictus)	chr2.103_2567476	chr2.103	2567476	A	G	standard	0.812	recommended
534031785	Affx-1251027196	AX-580643884	CCAATCAAATATATTTTCTAAGATACTGCTGCAGT[C/T]TGTGAGTCATATTGAATATGAAATGCAAGTCTACG	Y	2	1	2	1	10188	r		218	mosquito (Aedes albopictus)	chr3.136_3720825	chr3.136	3720825	T	C	standard	0.812	recommended
537983431	Affx-1250027742	AX-584544299	ATGCCGGTGTTCAGTGAGGCTTAGAATTCAATGCA[A/G]AAAAATAACTACAAAAATGTTTGATTCAGAGTAAA	R	2	1	2	1	10188	f		218	mosquito (Aedes albopictus)	chr2.140_9132333	chr2.140	9132333	A	G	standard	0.812	recommended
534520794	Affx-1251202936	AX-581117246	AGGTGTACGGTTCTTCTGCCAGCAATCAGTTATTT[C/T]AGTTATCAATGGATATGTGGTGACATTATGTAGAC	Y	2	1	2	1	10188	r		218	mosquito (Aedes albopictus)	chr3.166_9159532	chr3.166	9159532	C	T	standard	0.812	recommended
535757005	Affx-1248908139	AX-582333756	ATAGAAGTCGCAATACTTTGGGAGCATAACGTAAT[A/G]AGTACCGTAAAATGAGCTTGATTGATCACCCATAG	R	2	1	2	1	10188	f		218	mosquito (Aedes albopictus)	chr3.70_3856716	chr3.70	3856716	A	G	standard	0.812	recommended
535103424	Affx-1251407406	AX-581689590	TAAAGTAAAGTAGCTAACTTAATAACAATACATCA[A/T]TAATATAATTGATCTTAGATGCATCTTAGAGGCGC	W	4	1	2	1	10188	f		218	mosquito (Aedes albopictus)	chr3.28_3581345	chr3.28	3581345	A	T	standard	0.812	recommended
536444741	Affx-1249230419	AX-583011103	ATCCGCAAACAAACCCAGATAACTATTTATAAGAT[A/T]CATTCCTTTAAAACTTTACAGAAATCTTTATACGA	W	4	1	2	1	10188	r		218	mosquito (Aedes albopictus)	chr3.95_2230109	chr3.95	2230109	A	T	standard	0.812	recommended
534553216	Affx-1251211011	AX-581148954	CCACAAAACTAGTGATAGCTAACGAAAAGCAGAAA[A/C]TATTTTGAGAACTAGAATAGAATGTAACAACAAAA	M	2	1	2	1	10188	f		218	mosquito (Aedes albopictus)	chr3.168_1826498	chr3.168	1826498	A	C	standard	0.812	recommended
538253871	Affx-1250298244	AX-584813834	TGACCATGGGAAGCTTTACCTCGATCATCAACAAG[A/T]CCTACACACTTACTACGTACTTCTGGAACATAAAG	W	4	1	2	1	10188	f		218	mosquito (Aedes albopictus)	chr2.186_16578524	chr2.186	16578524	A	T	standard	0.812	recommended
536064736	Affx-1249041049	AX-582632047	CGAACCATAAAAAATCAATCATCTGGCCTCAATCT[G/T]CCCCACGATACACATTAAAACATGAGAAGCGAAGA	K	2	1	2	1	10188	f		218	mosquito (Aedes albopictus)	chr2.172_6537254	chr2.172	6537254	G	T	standard	0.812	recommended
533994939	Affx-1251009426	AX-580607122	TGCGCAACCGTCCAGTATTAAAATTGGGCAAATAA[A/T]TCATTCAGACCAACGCTCAAACTAAAAATGTTAAT	W	4	1	2	1	10188	f		218	mosquito (Aedes albopictus)	chr3.125_705923	chr3.125	705923	A	T	standard	0.812	recommended
537556971	Affx-1249786227	AX-584119220	TTGTCCGTAAAGTATGCAACGATTTAGGACTGATT[C/G]ACTATCGCAAAGTTCAGTACTCAGATTTCGTCCAG	S	4	1	2	1	10188	r		218	mosquito (Aedes albopictus)	chr1.90_1154791	chr1.90	1154791	G	C	standard	0.812	recommended
533841371	Affx-1250945874	AX-580456208	TTCGAATTGCATTTTTCTCAGGTGTTTGGAATGTG[A/G]ATTTGATGCAGATAGGAATAAATATAGAGGGAGCT	R	2	1	2	1	10188	r		218	mosquito (Aedes albopictus)	chr3.111_2236712	chr3.111	2236712	A	G	standard	0.812	recommended
534822680	Affx-1251298534	AX-581411683	CGATGACATCCTTGAACTCGTAAGCCGTTGAAGTG[C/T]TGTTCAGCTCCGTGATCATGCGGAAATTAAATGGC	Y	2	1	2	1	10188	r		218	mosquito (Aedes albopictus)	chr3.180_1526643	chr3.180	1526643	T	C	standard	0.812	recommended
537449171	Affx-1249734246	AX-584011742	GTAAAAAGTGACTAAATTAGCAACGGGTATTCAAA[A/C]TCCGATTCCCTCTGGCACATCAGTTTCTACTCGGG	M	2	1	2	1	10188	f		218	mosquito (Aedes albopictus)	chr1.85_11040379	chr1.85	11040379	C	A	standard	0.812	recommended
536913364	Affx-1249464561	AX-583478312	AAAATTGGTAAAAATTTCAATTTTTTGGCAAGAAA[A/G]TTTGAAATTCTGTAGGTCCGTAATGCGTTAATCAA	R	2	1	2	1	10188	r		218	mosquito (Aedes albopictus)	chr1.149_4823644	chr1.149	4823644	G	A	standard	0.812	recommended
535284481	Affx-1251475638	AX-581868698	TCCCAAGAAAGACCACATCCGCAAAAGGGAGATCA[A/T]TCAACGATGTTATTTATTGACTGAGAGCGATCAAT	W	4	1	2	1	10188	f		218	mosquito (Aedes albopictus)	chr3.45_6037876	chr3.45	6037876	A	T	standard	0.812	recommended
534717768	Affx-1251261380	AX-581309454	GCGAAGATTCGAGACGATTACAAGCATTTGAATGA[A/G]CAAGAGCTGGAGGCTCTCCGGGAGGAATACCAACA	R	2	1	2	1	10188	f		218	mosquito (Aedes albopictus)	chr3.170_13135774	chr3.170	13135774	A	G	standard	0.812	recommended
533033025	Affx-1250569095	AX-579651299	TATTCGTTTTCTGCTCGAACCTTATCGATTTCCGC[C/T]TTTAGTACATCACATTCTTCCGATAGCTTTTGTTT	Y	2	1	2	1	10188	r		218	mosquito (Aedes albopictus)	chr2.42_8120549	chr2.42	8120549	C	T	standard	0.812	recommended
533389047	Affx-1250748074	AX-580007095	ACCTCTGATATTTAGGAAATCTCTTTGCTATACAA[A/T]CCTTGAATTTAATATTGTTTACTTACTCGGATTGA	W	4	1	2	1	10188	f		218	mosquito (Aedes albopictus)	chr2.84_207830	chr2.84	207830	T	A	standard	0.812	recommended
535322492	Affx-1251487253	AX-581906138	CCAACCGTCATGTGTAGACTATGTGCTAAACGAAT[A/G]CAGCAATAAATATAACCCGGCTGAAGTTACGTCCG	R	2	1	2	1	10188	f		218	mosquito (Aedes albopictus)	chr3.45_12038075	chr3.45	12038075	G	A	standard	0.812	recommended
536135464	Affx-1249076399	AX-582702629	AACCAACAGAATTTTGGCAAACTTTACCAATAAAA[A/G]TCGAGCGAGCTAACATTTTGAAGCAGTGGCAACGA	R	2	1	2	1	10188	f		218	mosquito (Aedes albopictus)	chr3.75_5698834	chr3.75	5698834	A	G	standard	0.812	recommended
538095905	Affx-1250140260	AX-584656233	TTTGTATACAAAGTGCATCGCACTGAGAGTCAGTA[A/G]AATGGAAACTCGATGCATTGCTATTTGTGTACATA	R	2	1	2	1	10188	f		218	mosquito (Aedes albopictus)	chr2.167_596999	chr2.167	596999	G	A	standard	0.812	recommended
535780197	Affx-1248914386	AX-582353342	TTGTATCGGTACGTTGCACAACTATAGTTGTCGAA[C/T]TTTTAGAAGAAATATCTTGTACTACTTCGGCAGTA	Y	2	1	2	1	10188	r		218	mosquito (Aedes albopictus)	chr3.72_2301359	chr3.72	2301359	C	T	standard	0.812	recommended
532831610	Affx-1250468512	AX-579449966	AAATCCACAATCATCACACCATAACTCTACAAGAG[A/T]ATTACTAATCATGAACGGTTGGTTATCTTCAGCAG	W	4	1	2	1	10188	r		218	mosquito (Aedes albopictus)	chr2.22_1456594	chr2.22	1456594	A	T	standard	0.812	recommended
537368563	Affx-1249693863	AX-583931673	ACAATTTAACCACGCGGATTTTCAATTGAGAATAA[A/T]CCTCAAACGTGAAAGTTTCTTTGCCTTTACCATTT	W	4	1	2	1	10188	f		218	mosquito (Aedes albopictus)	chr1.7_15132969	chr1.7	15132969	T	A	standard	0.812	recommended
533357301	Affx-1250730885	AX-579975366	CGGACCTAAATGAATAGGGTGTGCGACTATTAGGG[G/T]TGATTTTGGTTATAACACAGTTAGTTTTATACCAA	K	2	1	2	1	10190	r		218	mosquito (Aedes albopictus)	chr2.82_16669339	chr2.82	16669339	T	G	standard	0.81	recommended
538401312	Affx-1250445719	AX-584960812	AATATCAGAACTGACAAATACCAGTGACAAAACAG[A/T]AGTTCACATTGTAGCACACAACACTCTCAATTGTA	W	4	1	2	1	10190	f		218	mosquito (Aedes albopictus)	chr2.205_3939321	chr2.205	3939321	A	T	standard	0.81	recommended
537478562	Affx-1249748963	AX-584041040	AGAGCTGATCGACAAACTCATGACCATTGAAAGAT[A/C]CAACTTCGAAGGTGCCTTTGGAGAGGATATTGTTA	M	2	1	2	1	10190	f		218	mosquito (Aedes albopictus)	chr1.85_17102230	chr1.85	17102230	C	A	standard	0.81	recommended
537717949	Affx-1249868215	AX-584279724	GAATCAATGAAAAGTTTCTAGTTCTTGAGAGATAC[A/G]AAAAGTTTACTCGTCGCTCTTAAATGTTGTATGTG	R	2	1	2	1	10190	f		218	mosquito (Aedes albopictus)	chr1.95_169210	chr1.95	169210	G	A	standard	0.81	recommended
538520747	Affx-1250050034	AX-585075254	TCGTCATATGTACAACCAGAAGAGGATCTAGTGAT[A/T]GAACCGTACAAGTTGGAAAGGATTACATTTGATGA	W	4	1	2	1	10190	r		218	mosquito (Aedes albopictus)	chr2.140_19194434	chr2.140	19194434	A	T	standard	0.81	recommended
538680053	Affx-1250209387	AX-585233837	GTACTAATGCTGTCAAGGAAACAGAACCTGACAAA[C/T]TGAATGAAGATGTCAAACTATTAGAGGGCATCATA	Y	2	1	2	1	10190	r		218	mosquito (Aedes albopictus)	chr2.176_543823	chr2.176	543823	C	T	standard	0.81	recommended
534471637	Affx-1251187376	AX-581071849	GGATGAGGATGGGTTGTACTTACTATTATGAAAAG[A/T]ATTGCTACAAATGTTCTCGTGTTGTTTCGATCATG	W	4	1	2	1	10190	r		218	mosquito (Aedes albopictus)	chr3.166_3005086	chr3.166	3005086	A	T	standard	0.81	recommended
534476442	Affx-1251188829	AX-581076069	AAAAATCTGGTACAATAAAGAGTGTTCAATCAATC[A/C]AATGTAATTAATTACTGAATCTCAGAAAACTCACA	M	2	1	2	1	10190	r		218	mosquito (Aedes albopictus)	chr3.166_3630506	chr3.166	3630506	C	A	standard	0.81	recommended
534104309	Affx-1251062011	AX-580715974	AATGGTAACTCAGAGAACCACATCGTTGTAAAGAT[A/G]AAATCGGTAACTCCTTGCTTTACGAGCTGCAGTGC	R	2	1	2	1	10190	f		218	mosquito (Aedes albopictus)	chr3.142_3911686	chr3.142	3911686	A	G	standard	0.81	recommended
537895784	Affx-1249957271	AX-584456976	GAAGGCTGGAAAGTGAATCAACTGGCATTTGAAAT[A/G]AAATAACATTTCGGCGCTTGCTTTTCTGATGACAA	R	2	1	2	1	10190	f		218	mosquito (Aedes albopictus)	chr2.122_482777	chr2.122	482777	G	A	standard	0.81	recommended
538184312	Affx-1250228678	AX-584744440	TTTCGTTTGACGACTCAACAAACTCAATTCCAAAT[C/T]ATTGCCATTCGTCTTGATGGTTCACTTGGATCATT	Y	2	1	2	1	10190	f		218	mosquito (Aedes albopictus)	chr2.179_1030223	chr2.179	1030223	T	C	standard	0.81	recommended
537414210	Affx-1249716721	AX-583976937	ACATTAATAGCATCTCTTAAAATAAACAATGCATA[C/T]ATACAGCGCATGTTTAACTATCATAATTCTTCGAA	Y	2	1	2	1	10190	f		218	mosquito (Aedes albopictus)	chr1.83_743372	chr1.83	743372	C	T	standard	0.81	recommended
535577573	Affx-1248845844	AX-582157245	CTTCATACATATTTACAACTTATAGGGAGTAATAA[A/T]TACACATTTTTCGTTTTGTTCCAAATGGTCAATTT	W	4	1	2	1	10190	f		218	mosquito (Aedes albopictus)	chr3.66_4302021	chr3.66	4302021	T	A	standard	0.81	recommended
537016909	Affx-1249516148	AX-583581569	CGCAAAAGATCAAGTACTGACGATCAAAAGCGTGA[A/T]ATTGGTTTGATCGAGATAGCGACCACAGTACTGTA	W	4	1	2	1	10190	r		218	mosquito (Aedes albopictus)	chr1.170_2887945	chr1.170	2887945	T	A	standard	0.81	recommended
537566187	Affx-1249790849	AX-584128405	TGCCTCACGTGCCGGCTGCCGGAACATATTGTTTT[C/T]GAATTGTTTCACGAAAGAGATGAATTTAATTTTGT	Y	2	1	2	1	10190	r		218	mosquito (Aedes albopictus)	chr1.90_2634653	chr1.90	2634653	C	T	standard	0.81	recommended
538723974	Affx-1250253314	AX-585277610	CAATTGAAATGAACTTTGTGATGGGAATATCAGTT[A/G]GTTTTTGTTTTTCTAGAAGAGGCGATGATTAAGTG	R	2	1	2	1	10190	r		218	mosquito (Aedes albopictus)	chr2.186_999544	chr2.186	999544	G	A	standard	0.81	recommended
538861024	Affx-1250390387	AX-585414293	GAACTCATCTACTTGCCCTTTTTGTCAGCTCCATC[A/G]TACTCCATACATGCATATTGCCTATTTGTTTATCC	R	2	1	2	1	10190	r		218	mosquito (Aedes albopictus)	chr2.196_5604560	chr2.196	5604560	G	A	standard	0.81	recommended
538001393	Affx-1250045708	AX-584562210	TGTTTTCTCATCGGACACGATTCAAGCAAAGACAT[C/T]TGACTGGAGATGATGTTTGGTTGGAGAAGAGAGGG	Y	2	1	2	1	10190	f		218	mosquito (Aedes albopictus)	chr2.140_16415910	chr2.140	16415910	C	T	standard	0.81	recommended
538855814	Affx-1250385175	AX-585409098	CTCAATCAAACTCAAGTTCAGTTTGATGTTAAGAT[C/T]TTTTCTCTTTCGACATTCTTTTGTTTCGACCTTCT	Y	2	1	2	1	10190	r		218	mosquito (Aedes albopictus)	chr2.196_3073896	chr2.196	3073896	C	T	standard	0.81	recommended
536724988	Affx-1249370472	AX-583290392	AGCGATGCCCCGGCTGGGACGGTTTCCATGATTTT[C/T]CTGATCACCGTATTGTTGAGTTGAACCGAACGCAT	Y	2	1	2	1	10190	r		218	mosquito (Aedes albopictus)	chr1.134_142223	chr1.134	142223	T	C	standard	0.81	recommended
537698445	Affx-1249857410	AX-584260291	GTTAACCCTCATCCCGACGACGTCGCTATCGTGTC[G/T]CTATGTAGGTGCTTGTAGCTGGTGTACAAATACCT	K	2	1	2	1	10190	r		218	mosquito (Aedes albopictus)	chr1.91_7114718	chr1.91	7114718	G	T	standard	0.81	recommended
537880330	Affx-1249949509	AX-584441579	TAGAAAACCAATATGAACCACCTCGTTTATCCTAA[A/G]ACCTAGCTCGCTCCTTCGATTAATCAATATCCAGC	R	2	1	2	1	10190	f		218	mosquito (Aedes albopictus)	chr2.118_3109334	chr2.118	3109334	A	G	standard	0.81	recommended
538483163	Affx-1250012438	AX-585037842	TGAGGGAACGAAGATCGAAAGCGCATTGAATTGTT[A/G]AGTGTGTTTAACTTTGATAATGCTATTATATCAAA	R	2	1	2	1	10190	r		218	mosquito (Aedes albopictus)	chr2.130_1047045	chr2.130	1047045	A	G	standard	0.81	recommended
535183718	Affx-1251436975	AX-581768952	TTATCCGCCTAATAGACAGTTATATTTGCCGAAAT[A/G]AAATTTCGAGGCAGGTTTATTGAGAAAGGAAAATA	R	2	1	2	1	10190	f		218	mosquito (Aedes albopictus)	chr3.32_4809100	chr3.32	4809100	G	A	standard	0.81	recommended
534421401	Affx-1251170983	AX-581022795	CTCAATTTAAATTCTAGCGGTGGCAACGACAAAGC[A/G]ACTAACAACTAACCGGAGCTACGCACTAAACCAGA	R	2	1	2	1	10190	f		218	mosquito (Aedes albopictus)	chr3.162_250399	chr3.162	250399	A	G	standard	0.81	recommended
535474232	Affx-1248813707	AX-582055991	AGATGTAATCTACTGCAAACAACTTTCACTGAATA[C/T]CTAGGTCTCCGTGCTCTATGGATTGCCACTACTGC	Y	2	1	2	1	10190	f		218	mosquito (Aedes albopictus)	chr3.58_5682003	chr3.58	5682003	C	T	standard	0.81	recommended
533056209	Affx-1250581431	AX-579674478	AGTCGATTTATTTGGTATTAAAATTCGATCGATAC[A/C]TTCCTTCCGTCAACGTCTTTCATTCGGAACAAGTG	M	2	1	2	1	10190	f		218	mosquito (Aedes albopictus)	chr2.42_12332465	chr2.42	12332465	C	A	standard	0.81	recommended
535184464	Affx-1251437251	AX-581769688	TCCTTAAAGTTTACGAGAATAATGATTCACAGAAT[C/G]CCCAGGTACTATTTACCAATTCAACAAGCCAATAT	S	4	1	2	1	10190	f		218	mosquito (Aedes albopictus)	chr3.32_4909169	chr3.32	4909169	G	C	standard	0.81	recommended
535865732	Affx-1248948795	AX-582437468	ACATTTTTCAAGGAAGAAAGTGAAATTACTACATT[C/G]ATACATACATTCATCGAACCGACCGTGTCCGCGTG	S	4	1	2	1	10190	f		218	mosquito (Aedes albopictus)	chr2.17_13140284	chr2.17	13140284	C	G	standard	0.81	recommended
538485378	Affx-1250014654	AX-585040026	AATTATGGGTGGATTCCAAACGGTGAAATCATGCG[A/T]TTATCCCTAATTATTTTCTAGTATGTCTCTTTTTG	W	4	1	2	1	10190	r		218	mosquito (Aedes albopictus)	chr2.134_608955	chr2.134	608955	T	A	standard	0.81	recommended
533565760	Affx-1250836217	AX-580183652	GACTTGAGTGTCTGATATCCTGGTTAAAAGCAACT[A/G]ATCATCATCAGAGTGACAGAGAGAGGTTCTAAGCA	R	2	1	2	1	10190	f		218	mosquito (Aedes albopictus)	chr2.87_34922369	chr2.87	34922369	G	A	standard	0.81	recommended
536261304	Affx-1249138741	AX-582828198	CCAAACAACTACGATACTTTTCCCAGATAGCTGTA[C/G]TTGTAATACTCTAACATTGTATCTCATCGCGTCAT	S	4	1	2	1	10190	r		218	mosquito (Aedes albopictus)	chr3.77_6321302	chr3.77	6321302	G	C	standard	0.81	recommended
538110341	Affx-1250154699	AX-584670638	AATGTTTTTTCTGGATCAATGGAACCGAAAAATGA[A/G]AAAAAGTGAGATCCGGAATATTGCGAGCGGTTTAC	R	2	1	2	1	10190	f		218	mosquito (Aedes albopictus)	chr2.169_1331990	chr2.169	1331990	A	G	standard	0.81	recommended
536413177	Affx-1249215610	AX-582979618	GAAAAAGTGTTATGCTTCATTTAAGTTTTGTTGAA[A/G]ATATGTTGAAAACTGGCATAAATTACGTAAATTTG	R	2	1	2	1	10190	f		218	mosquito (Aedes albopictus)	chr3.93_2010639	chr3.93	2010639	G	A	standard	0.81	recommended
535282903	Affx-1251475605	AX-581867137	GCCATACTCTTGGTACTCTTGGCAAAACATTGTTT[C/T]GGATTCGTATTCGTCGAAAACTTGAGCAGTGGTAC	Y	2	1	2	1	10190	r		218	mosquito (Aedes albopictus)	chr3.45_5920790	chr3.45	5920790	C	T	standard	0.81	recommended
534709553	Affx-1251259727	AX-581302756	TGTAATAAAATAAACTAGGCATCTTATGTTCTAGT[A/G]GTTTATTTAGAAACCATCTTGTATATACTTTTTAC	R	2	1	2	1	10190	r		218	mosquito (Aedes albopictus)	chr3.170_12536994	chr3.170	12536994	G	A	standard	0.81	recommended
537907256	Affx-1249961703	AX-584468405	AAAAGCAGTCGGGCGAGACTGCGGTTTACTTCCTA[A/T]TTGTCCCGAGCAGATGTATTGAATGTAACCCACTT	W	4	1	2	1	10190	r		218	mosquito (Aedes albopictus)	chr2.122_2145427	chr2.122	2145427	A	T	standard	0.81	recommended
538806822	Affx-1250336172	AX-585360282	GTATGAAGAAGAATAATAAATTCAGCTTCGCCAAT[G/T]TTTTGCTCATCCCACCCAATTTGTCAAGAAAGGAT	K	2	1	2	1	10190	r		218	mosquito (Aedes albopictus)	chr2.186_28375033	chr2.186	28375033	G	T	standard	0.81	recommended
532821646	Affx-1250463526	AX-579440002	TGTTCACAACGGCATCCTTCTCTGCAGTACATTTG[C/T]TTTAATTCATAAGCACATTTCTCCCAGTGTACGTA	Y	2	1	2	1	10190	r		218	mosquito (Aedes albopictus)	chr2.205_9046127	chr2.205	9046127	T	C	standard	0.81	recommended
536004565	Affx-1249010547	AX-582572021	CGTCGGTTTCATATCTGAAAAAATATCACAATTGG[C/T]GTCACTAAATCTAGAATCTGCATTCCTAAATTTAC	Y	2	1	2	1	10190	r		218	mosquito (Aedes albopictus)	chr2.17_38082999	chr2.17	38082999	C	T	standard	0.81	recommended
536252798	Affx-1249135177	AX-582819705	GTATTCTAAATATTCCCATAAACAATAGATCAAAT[A/G]AAATTTGTCCAAACTTTTGTTTTTTTTTTTTTTTG	R	2	1	2	1	10190	f		218	mosquito (Aedes albopictus)	chr3.77_4775808	chr3.77	4775808	A	G	standard	0.81	recommended
535673956	Affx-1248877618	AX-582251756	CCCATAAACTCTTTTATTTTCCCCGAAAAATATAT[C/T]TCTTATCAAATTAAATGATCTTCTGCTTTTGTGTT	Y	2	1	2	1	10190	r		218	mosquito (Aedes albopictus)	chr3.7_2127735	chr3.7	2127735	C	T	standard	0.81	recommended
536487678	Affx-1249251842	AX-583053963	TTAAATATTAACTTACCTTCCAAAAGGTCCTTTTG[A/G]ATCTTATTCTGATAAATGTCGACTATTTCCACTTT	R	2	1	2	1	10190	r		218	mosquito (Aedes albopictus)	chr1.10_3774874	chr1.10	3774874	G	A	standard	0.81	recommended
534084220	Affx-1251052910	AX-580696007	CTACGATACCAGCTAACTAAAGCAATAGCAAGAAC[A/G]AAAGAGTACACAAATGATTCTTCAACGAAAGGTCA	R	2	1	2	1	10190	f		218	mosquito (Aedes albopictus)	chr3.142_587971	chr3.142	587971	G	A	standard	0.81	recommended
536012985	Affx-1249015047	AX-582580413	AATATTGAGATAGGTTAGAAATATTTAATGACATG[A/G]ACGAACATTCATTCCCCGCCGCGGCGCACAGAGGC	R	2	1	2	1	10190	f		218	mosquito (Aedes albopictus)	chr2.17_40203666	chr2.17	40203666	G	A	standard	0.81	recommended
536530176	Affx-1249273078	AX-583096284	CAATAGTGATAACAAGATTATCTTTTGTGGTTTAT[G/T]AGTCTAGTGATGATAACTGGGATAAGAATAATAGC	K	2	1	2	1	10190	r		218	mosquito (Aedes albopictus)	chr1.105_168795	chr1.105	168795	G	T	standard	0.81	recommended
534422547	Affx-1251172423	AX-581023934	GTGAATAAATCTACCGAGTGCCTGTTTCTATTGTT[G/T]TATGCTGTTGTTGTGGGTATTGATTTGATTAAACA	K	2	1	2	1	10190	r		218	mosquito (Aedes albopictus)	chr3.163_1682101	chr3.163	1682101	T	G	standard	0.81	recommended
532973490	Affx-1250540095	AX-579591786	CCGGAGATTCTACCGTTCAGATCAGATAGGTACAG[A/C]AAAGGGGTCGGGTTATCCGCAGAACAGTGGAAGCG	M	2	1	2	1	10190	f		218	mosquito (Aedes albopictus)	chr2.38_142332	chr2.38	142332	C	A	standard	0.81	recommended
533505934	Affx-1250806374	AX-580123883	GCCATGGAGTTCTCAGATACATGAGTGAGGGTAAA[G/T]CTCAATGCTATGGGGACAGTGAACTTCGGCATAGA	K	2	1	2	1	10190	f		218	mosquito (Aedes albopictus)	chr2.87_22592270	chr2.87	22592270	G	T	standard	0.81	recommended
536013893	Affx-1249015505	AX-582581318	CGGAGAAGTACAAACGCAACCAGCGTAATCGTCAA[A/G]TATGCCACCGTTTTCACCGTATAATGTGCCAACTT	R	2	1	2	1	10190	f		218	mosquito (Aedes albopictus)	chr2.17_40788262	chr2.17	40788262	A	G	standard	0.81	recommended
533099810	Affx-1250603401	AX-579718056	TGCCAAGTTGTTTGCAAACAGCTTCAATACAGCAA[A/G]TCTGTTTCCAAACAAGTCTTATTTTTATCAATATT	R	2	1	2	1	10190	f		218	mosquito (Aedes albopictus)	chr2.48_8960847	chr2.48	8960847	A	G	standard	0.81	recommended
536537432	Affx-1249277679	AX-583103523	AAAAGAAATGAAATTATCGATTAGTTGCCGATAAG[A/T]TGATGATCCGGAGTTACAAATGAATGCAAAAAAAC	W	4	1	2	1	10190	f		218	mosquito (Aedes albopictus)	chr1.106_1206458	chr1.106	1206458	A	T	standard	0.81	recommended
537380926	Affx-1249700075	AX-583943902	CCTGGCGATGAAAAGGTTCCCGAACGTAATAAGCT[A/G]ACAGTCATCGAGCCGGATGTCGAAATGCTGCAAGT	R	2	1	2	1	10190	f		218	mosquito (Aedes albopictus)	chr1.74_229023	chr1.74	229023	G	A	standard	0.81	recommended
537507904	Affx-1249761693	AX-584070297	GACAATCAATTTAAAAGACAATCTCCCTATTGAAT[A/T]GTAATTAATATTGCTTAACCTTACCTCTCTGTCAT	W	4	1	2	1	10190	r		218	mosquito (Aedes albopictus)	chr1.85_22149369	chr1.85	22149369	A	T	standard	0.81	recommended
536368261	Affx-1249193117	AX-582934871	AGCTTTTCTTTGCGAGGCAATCGTCGTAGAAAAAT[G/T]ACCTGAACCATAACGGAAAAGGTTCAATGGTTTTA	K	2	1	2	1	10190	f		218	mosquito (Aedes albopictus)	chr3.82_3938330	chr3.82	3938330	G	T	standard	0.81	recommended
535983286	Affx-1249000190	AX-582550772	CAGATTGGATCGACTAATTTAAACCAATTAGTGTG[A/T]AAGAGTTTTATTTAGGTGGTGGTCGCCCAGGGGAG	W	4	1	2	1	10190	f		218	mosquito (Aedes albopictus)	chr2.17_33515444	chr2.17	33515444	A	T	standard	0.81	recommended
533244975	Affx-1250674752	AX-579863127	TTTGTTCTGGGAAAGTTTAGTAAATTCTTGTGCTT[C/T]CATGTATCAAATTTGGTGGTCCGTTTAGTTTATTA	Y	2	1	2	1	10190	r		218	mosquito (Aedes albopictus)	chr2.66_474034	chr2.66	474034	T	C	standard	0.81	recommended
537724791	Affx-1249870500	AX-584286528	CCCCCTTGGACAATCGGAAGGCGACATCCCCAGGT[A/G]GCTTGGATGTATGTTACCAAACCGGTAACAAAAAT	R	2	1	2	1	10190	r		218	mosquito (Aedes albopictus)	chr1.96_989548	chr1.96	989548	G	A	standard	0.81	recommended
534033502	Affx-1251028074	AX-580645601	TTCGTTTTCTGCCGGTTTTTGCTACCACATGCTAT[A/G]CGCTATACTATCACCATTTGGATACATTATTGCTA	R	2	1	2	1	10190	r		218	mosquito (Aedes albopictus)	chr3.136_3919904	chr3.136	3919904	A	G	standard	0.81	recommended
536464656	Affx-1249241249	AX-583031002	AAAAAGCAATAAAATATTCGCTTTACTAAAACAAA[C/T]GGAATAAATAGGAAAAGTTATAGGAAAATCGAGAG	Y	2	1	2	1	10190	f		218	mosquito (Aedes albopictus)	chr3.95_4818631	chr3.95	4818631	C	T	standard	0.81	recommended
536223564	Affx-1249120491	AX-582790560	TTAATACATGAACAATGATAGATTAGGTAAAACGT[G/T]CTTTTTCTCGCCGGTATGAGAATGTTCACCAGTCT	K	2	1	2	1	10190	f		218	mosquito (Aedes albopictus)	chr3.75_21961629	chr3.75	21961629	G	T	standard	0.81	recommended
533655572	Affx-1250872503	AX-580272776	GTATTGAAATTCTGCACTTCCATAGCTATCATCTG[A/G]CAGTTGACTTTTAACTTTGCTGATCATTCGTAGAA	R	2	1	2	1	10190	r		218	mosquito (Aedes albopictus)	chr2.97_9248373	chr2.97	9248373	A	G	standard	0.81	recommended
536862454	Affx-1249440394	AX-583427533	AATATCTTTTCTAAATCGAACACTATTTCAGAAAC[C/T]ACCCAGGAATCGGTGCGGTCGATCAGTCGGGAACG	Y	2	1	2	1	10190	f		218	mosquito (Aedes albopictus)	chr1.147_5191210	chr1.147	5191210	T	C	standard	0.81	recommended
533432784	Affx-1250769906	AX-580050799	AACAGACTGATACCACTGAAAGAGGAATTTGTCAA[A/G]ACCAGAGCAGCACGGAAGCGAGCAGCTACATTAAT	R	2	1	2	1	10190	f		218	mosquito (Aedes albopictus)	chr2.87_8148188	chr2.87	8148188	G	A	standard	0.81	recommended
534159643	Affx-1251082239	AX-580770197	AACAGCAAATGATTATCTAGAGTGATTATAGTCAA[A/G]TGAAAATATGTGAAAAATGTGACAAGCGAGAGAGC	R	2	1	2	1	10190	f		218	mosquito (Aedes albopictus)	chr3.145_8587186	chr3.145	8587186	G	A	standard	0.81	recommended
533093587	Affx-1250600283	AX-579711835	ATTATTCAAACAAAACAGTATCCACAATTGCTATA[A/T]ACATATACATAGGCATAGTTCAGTAGAGCGATTAT	W	4	1	2	1	10190	f		218	mosquito (Aedes albopictus)	chr2.48_7460012	chr2.48	7460012	T	A	standard	0.81	recommended
537855350	Affx-1249936973	AX-584416671	GGAGGACGGAAAGATTATTTCATCGAGGAAGAAAA[A/C]GTTTAGCATACGGAATGAGTTTTAAAATGAATCTC	M	2	1	2	1	10190	f		218	mosquito (Aedes albopictus)	chr2.107_6796789	chr2.107	6796789	C	A	standard	0.81	recommended
538572009	Affx-1250101319	AX-585126187	GCTAACTTTACACTGGTCGTCAACACCCAAAGAAG[C/T]AGTTCTATTTGTCATCGTGTCCGCAATAGCAGAAC	Y	2	1	2	1	10190	r		218	mosquito (Aedes albopictus)	chr2.155_9412937	chr2.155	9412937	C	T	standard	0.81	recommended
535074968	Affx-1251397548	AX-581661425	TGCCGCAGGAGTACCGGCAGATCTTGCTGGACTAT[G/T]TTTGACATTCTTGGCAGTAGGATGAACGAGAGATT	K	2	1	2	1	10190	r		218	mosquito (Aedes albopictus)	chr3.27_6883207	chr3.27	6883207	G	T	standard	0.81	recommended
533359674	Affx-1250732041	AX-579977736	GCCCGTAGAAGAGTTTCCACTTCCAATCGGTTTTC[C/T]TATTCCAGTTCGCTATTGTGAATTAAATCACTTCC	Y	2	1	2	1	10190	r		218	mosquito (Aedes albopictus)	chr2.82_17067624	chr2.82	17067624	T	C	standard	0.81	recommended
536578813	Affx-1249298416	AX-583144776	TAATTTTGTGTCGACAACCCATTGATAGTAGGTAA[C/T]ATAGTAGACAGTCAGCCAATCGAAACAACAGTGCA	Y	2	1	2	1	10190	f		218	mosquito (Aedes albopictus)	chr1.113_3700031	chr1.113	3700031	T	C	standard	0.81	recommended
535171247	Affx-1251431521	AX-581756579	GGTATTCTACCTCTTATACCAAGGCTTCTTAATAC[C/T]TTAATCAGGTTGTAGGTATTGGGTTTGCATACCGG	Y	2	1	2	1	10190	f		218	mosquito (Aedes albopictus)	chr3.32_1953508	chr3.32	1953508	T	C	standard	0.81	recommended
538104683	Affx-1250149038	AX-584664998	ACGTCCAAGATGCTTGGGATTTGTAAAACATGAAT[C/T]CAACAAACCGAAAGCTAGTCTTGCACTCCGACCGC	Y	2	1	2	1	10190	f		218	mosquito (Aedes albopictus)	chr2.167_3437100	chr2.167	3437100	C	T	standard	0.81	recommended
533994369	Affx-1251009142	AX-580606553	GTAAATATTGTGAGTCAGGTGTAAAAGTAAACCTA[C/T]AGTAAAACTATTCTAAAGCGTAATCCAAAACTTAC	Y	2	1	2	1	10190	f		218	mosquito (Aedes albopictus)	chr3.125_601789	chr3.125	601789	C	T	standard	0.81	recommended
533543423	Affx-1250823998	AX-580161339	CTCTTTAGAGAGCTGGCACATTAGCTTTTGTTTTA[C/T]CTTACAGGTACGATCATTTCTGGACCACAGCGGAT	Y	2	1	2	1	10190	r		218	mosquito (Aedes albopictus)	chr2.87_30452675	chr2.87	30452675	T	C	standard	0.81	recommended
535367226	Affx-1251502267	AX-581950334	GACGACGACGACTCGATTCGACTCGAGCGACTGCG[A/G]ATTTCAATCGCACGATTTCGCACTTTATTTCACGA	R	2	1	2	1	10190	r		218	mosquito (Aedes albopictus)	chr3.49_3343964	chr3.49	3343964	G	A	standard	0.81	recommended
537808146	Affx-1249913329	AX-584369632	CATCATTGCGCTTCATGTGCAAGGTATGAAACAAT[G/T]ATGAGATATAACATTCATGTAGTATGAAGAGATCA	K	2	1	2	1	10190	f		218	mosquito (Aedes albopictus)	chr2.103_8198079	chr2.103	8198079	G	T	standard	0.81	recommended
533761782	Affx-1250915600	AX-580377395	TCGAGAAACAGTGTATTTTTTTTTCTTCATTTGAG[A/T]TATGTGAGAGCGGATCATATGTTGATAAAATTGTA	W	4	1	2	1	10190	r		218	mosquito (Aedes albopictus)	chr3.1_10301420	chr3.1	10301420	A	T	standard	0.81	recommended
535334110	Affx-1251491203	AX-581917599	GGAGAGCGACAACCTCGGGCCGTACTATTGTTGAT[A/T]ATGTCTTATTTTGAATGGATGTTGGACAAGAAAAT	W	4	1	2	1	10190	r		218	mosquito (Aedes albopictus)	chr3.45_13844094	chr3.45	13844094	T	A	standard	0.81	recommended
532818291	Affx-1250461844	AX-579436647	ATTGGAGTTTGTGGCCGGGTTCTGCAGCAATGGTT[G/T]GGTTAGTATGTTGTTAGATGCCTGAGTTAACTGTG	K	2	1	2	1	10190	r		218	mosquito (Aedes albopictus)	chr2.205_8868495	chr2.205	8868495	T	G	standard	0.81	recommended
536215440	Affx-1249116412	AX-582782459	TTGGAGTGCAATTAAATCCACAAGTAACTGACATG[C/T]AACATATAACCGTAAATGTTGAACGTTTTCTGGCA	Y	2	1	2	1	10190	f		218	mosquito (Aedes albopictus)	chr3.75_19480409	chr3.75	19480409	T	C	standard	0.81	recommended
535187497	Affx-1251438974	AX-581772702	TTTCGAAGCATGGGCTCAACCACGTGAGACATATA[A/C]TAAACACTGATAAGAGGATGAGCAATGAATCAAAA	M	2	1	2	1	10190	r		218	mosquito (Aedes albopictus)	chr3.32_5582700	chr3.32	5582700	A	C	standard	0.81	recommended
538898603	Affx-1250427977	AX-585451741	GGCATGAAGCTGAGAATCGTGTGTTGGAGGGAGGC[A/G]ATCTCTTTTACAACTGCCAAGATAGCATTTTAGTC	R	2	1	2	1	10190	r		218	mosquito (Aedes albopictus)	chr2.198_5033856	chr2.198	5033856	G	A	standard	0.81	recommended
536528236	Affx-1249272074	AX-583094346	GGACAAAGTATATACATTCAGCTTCCATATCGCAT[C/T]AGTTTATCTGACTAGCACAAATAAATTATACATTT	Y	2	1	2	1	10190	r		218	mosquito (Aedes albopictus)	chr1.102_2357576	chr1.102	2357576	C	T	standard	0.81	recommended
537575809	Affx-1249795632	AX-584138016	CAGCATTATACTCATGACGATATGAACAATATATA[A/G]TAAATATTCTATTCACATCACCTCTTAGTTTAATC	R	2	1	2	1	10190	r		218	mosquito (Aedes albopictus)	chr1.90_4124335	chr1.90	4124335	A	G	standard	0.81	recommended
538367401	Affx-1250411797	AX-584927037	CTCAAATATTTACCCATGAACTTCAACTCAAGAAC[C/T]TCAAGAGACTCACGCTTTCTCGCTTCAAATAAGGC	Y	2	1	2	1	10190	f		218	mosquito (Aedes albopictus)	chr2.196_14707537	chr2.196	14707537	C	T	standard	0.81	recommended
534273271	Affx-1251118224	AX-580877188	AATCTCAACGAAGACATGTACGCCCAGGACTCGAT[C/T]GATTTGCTGCAGAACTCCGGAATTCAGTTTAAGAA	Y	2	1	2	1	10190	r		218	mosquito (Aedes albopictus)	chr3.151_9406680	chr3.151	9406680	C	T	standard	0.81	recommended
533511631	Affx-1250808051	AX-580129577	AAGGTATTTATGACTATGTTCTTCTCGTTTTTTTA[C/T]TCATGGGATAAATAAACACGACCAAACCGTTCACA	Y	2	1	2	1	10190	r		218	mosquito (Aedes albopictus)	chr2.87_23254066	chr2.87	23254066	C	T	standard	0.81	recommended
533454867	Affx-1250779622	AX-580072854	AGCTTTTGAACAAAGTTCTGATCTGGAACATCTGA[A/T]TTCCAAATTGAATATTTTGGATACTTCAAATGTCC	W	4	1	2	1	10190	r		218	mosquito (Aedes albopictus)	chr2.87_12557442	chr2.87	12557442	A	T	standard	0.81	recommended
535196893	Affx-1251441882	AX-581781991	GGAGAAAAAAGATGCTCAGGAAAAGTTGATTCAAG[A/G]GAAGCGTCAATTGGTGAAAGGAGGAAAAGGAGAAA	R	2	1	2	1	10190	f		218	mosquito (Aedes albopictus)	chr3.36_166369	chr3.36	166369	A	G	standard	0.81	recommended
536647841	Affx-1249332925	AX-583213547	TTTGGCTTTCTTTCAGATTAACAACACAACTCAAA[C/G]CTGCTGCTTTCGAGAACAATTTAAACCCTTTGTTC	S	4	1	2	1	10190	f		218	mosquito (Aedes albopictus)	chr1.124_3756986	chr1.124	3756986	C	G	standard	0.81	recommended
538226014	Affx-1250270385	AX-584786026	TGCTAGTTTTTTGTTGACATGTAGTAAAATATTAG[A/G]ATAAGAAAGGCACAACCGTAACATAGTGAATCAAT	R	2	1	2	1	10190	f		218	mosquito (Aedes albopictus)	chr2.186_7069633	chr2.186	7069633	G	A	standard	0.81	recommended
533996435	Affx-1251009413	AX-580608609	CACATGGGAATAAAACAGCTGGAACTGATATCATC[G/T]TGTAAGACGTCCTTTATTATAATAATAACATATTT	K	2	1	2	1	10190	r		218	mosquito (Aedes albopictus)	chr3.125_705267	chr3.125	705267	T	G	standard	0.81	recommended
538151634	Affx-1250195998	AX-584711839	GAAATTCTTTACGAGTACTAATAGTGTCCGGAAAT[G/T]TATTGTAATACATGCTGAATCTGATAATAGTATTG	K	2	1	2	1	10190	f		218	mosquito (Aedes albopictus)	chr2.175_5253034	chr2.175	5253034	T	G	standard	0.81	recommended
534482451	Affx-1251189579	AX-581081939	AAAAAAAAACTCTCTTCTCATCATCTTGTAATATA[A/G]ATTAGTTTATCTAGGTGGCAAAATGCTATTGTATA	R	2	1	2	1	10190	f		218	mosquito (Aedes albopictus)	chr3.166_3875261	chr3.166	3875261	A	G	standard	0.81	recommended
536515321	Affx-1249266651	AX-583081466	GCCATAAACCTGTTGTTGTTTTGTAGCTTTACATA[A/T]ACCTAATAACTCAGGTTTGAAAGACCCAACTTCAA	W	4	1	2	1	10190	f		218	mosquito (Aedes albopictus)	chr1.102_420017	chr1.102	420017	T	A	standard	0.81	recommended
537247201	Affx-1249633274	AX-583810893	AACTATCAAAGTGCTACTACAGGTGATTATATCTA[A/G]TATGTAGCATGTGGCAGTCATTATGACGCCCACGC	R	2	1	2	1	10190	f		218	mosquito (Aedes albopictus)	chr1.56_453153	chr1.56	453153	A	G	standard	0.81	recommended
537826532	Affx-1249922529	AX-584387969	TTGGGATGTGATTTTACTCGAAAAGTATGTTTCCA[A/T]CGGAGCAAATCCCACGGGAATGCAAACAAGTGGTC	W	4	1	2	1	10190	f		218	mosquito (Aedes albopictus)	chr2.107_328341	chr2.107	328341	T	A	standard	0.81	recommended
534320426	Affx-1251139039	AX-580923558	TTCAATTTCTTGTAAGCATTTACACTCAACTAGCA[A/G]ATATTGCTTGACATGCTATGTAATTTTGAAGAGTG	R	2	1	2	1	10190	f		218	mosquito (Aedes albopictus)	chr3.16_1990451	chr3.16	1990451	G	A	standard	0.81	recommended
532987777	Affx-1250547225	AX-579606072	GATTATGTAGCTAGTTATTTGGAATCAAGTTAGCA[A/G]AATCAAGCGGTTGCGTTTTAGGACGGTTATGCGAA	R	2	1	2	1	10190	f		218	mosquito (Aedes albopictus)	chr2.38_4249163	chr2.38	4249163	G	A	standard	0.81	recommended
538454260	Affx-1249983531	AX-585009034	TGGTGGGAAGGTTGGGGGGATGGGAGCTGGTGGTG[A/G]ATGGTTTCGATGTAGAGCAATTGAATGAGAGAAGG	R	2	1	2	1	10190	r		218	mosquito (Aedes albopictus)	chr2.125_2084326	chr2.125	2084326	G	A	standard	0.81	recommended
534028898	Affx-1251026332	AX-580640997	TGAAGATGCGGATATGAAAAGTACCAGTGATAGAA[A/C]TCAATACGTAGAACCCGACACACGTCATTGCATGG	M	2	1	2	1	10192	f		218	mosquito (Aedes albopictus)	chr3.136_3277142	chr3.136	3277142	A	C	standard	0.808	recommended
533657554	Affx-1250874261	AX-580274710	AATCTAGTGCTCTCTATTCTAAAGTTAATAAAACT[C/T]TAGCTCGAAGGTCAATTGTTACTGATCAAATCCTT	Y	2	1	2	1	10192	f		218	mosquito (Aedes albopictus)	chr2.97_9910833	chr2.97	9910833	T	C	standard	0.808	recommended
534832836	Affx-1251301901	AX-581421640	TTGTTTGCAAATAGATCAGCCCCATTGAGCGAGTT[A/C]AATATGTTATTGAGGATTAGTCGATTCAGTTCCAA	M	2	1	2	1	10192	r		218	mosquito (Aedes albopictus)	chr3.180_2525210	chr3.180	2525210	A	C	standard	0.808	recommended
535769708	Affx-1248911796	AX-582346242	AAAGAACTTCGAACTTGATTAAGTGACGAGCTAAA[C/T]ACATTCTTGGAAATGGCGATCAATCTTCTTGGGCT	Y	2	1	2	1	10192	f		218	mosquito (Aedes albopictus)	chr3.72_1406459	chr3.72	1406459	T	C	standard	0.808	recommended
535626088	Affx-1248862074	AX-582204821	CGAAGGTAGCACGAAATTACTATTTAGTGTGGTGA[A/T]TTAAGCTAAGTAGATAAGGATCGGAACGGCATGCG	W	4	1	2	1	10192	r		218	mosquito (Aedes albopictus)	chr3.69_5644895	chr3.69	5644895	T	A	standard	0.808	recommended
536465036	Affx-1249240534	AX-583031380	TTGTTTTACTTTGTTTTATTTGTGAGTAAAGTTCT[C/T]TTATTGTTTAAGTATACGTTTTCTCTCTTAGAATG	Y	2	1	2	1	10192	r		218	mosquito (Aedes albopictus)	chr3.95_4597275	chr3.95	4597275	C	T	standard	0.808	recommended
537213044	Affx-1249614106	AX-583776864	TGGAGTAATGAGTTTGATCGCATTCACCTCATCTG[A/T]TTCAGATTTCCCAATCACAGCGTTGAAATTCAAAT	W	4	1	2	1	10192	r		218	mosquito (Aedes albopictus)	chr1.50_7802099	chr1.50	7802099	A	T	standard	0.808	recommended
537494546	Affx-1249754981	AX-584056973	CTGTGCTATTTATTTATTTTACGAGTTGATTAAAC[A/G]GTTGCTTTAATTCCAACATATGCTTAACTCAGTAG	R	2	1	2	1	10192	r		218	mosquito (Aedes albopictus)	chr1.85_19575944	chr1.85	19575944	G	A	standard	0.808	recommended
537804291	Affx-1249911391	AX-584365783	AGTATCTCGACTAGTCCAAATTGGGCAGAAAAGTA[C/T]ACATACTTTGCGCTCGGCCGAGTATGCATTAATAG	Y	2	1	2	1	10192	f		218	mosquito (Aedes albopictus)	chr2.103_7750554	chr2.103	7750554	T	C	standard	0.808	recommended
537736941	Affx-1249876568	AX-584298608	GATTCCAGATCGTATTCTGATGGAATTTCGCAGAT[A/G]TTCTGGTAGGATTAATTTATTTTGTCATTATAATC	R	2	1	2	1	10192	r		218	mosquito (Aedes albopictus)	chr2.100_2236814	chr2.100	2236814	G	A	standard	0.808	recommended
535004647	Affx-1251367382	AX-581591591	AAACGACAAGATATACACACTGCTAAACACACAAA[C/T]ACAACAATAAATGAATATTGATGCAACTAAAACCA	Y	2	1	2	1	10192	f		218	mosquito (Aedes albopictus)	chr3.20_7977497	chr3.20	7977497	T	C	standard	0.808	recommended
537564786	Affx-1249790142	AX-584127011	TGTATACAGTGTATTCAAAATGGATCCATTAAATC[A/C]TTTACTAACAACCTTCAATATGTGCAAATTGTCTC	M	2	1	2	1	10192	r		218	mosquito (Aedes albopictus)	chr1.90_2486273	chr1.90	2486273	A	C	standard	0.808	recommended
538735034	Affx-1250264376	AX-585288649	GTTCCCAGCGCAGTGATGTCGACACGGGATTTGGC[C/T]TTCACGCTTACATACTAATCGCATTTATGATTTCA	Y	2	1	2	1	10192	r		218	mosquito (Aedes albopictus)	chr2.186_4714193	chr2.186	4714193	T	C	standard	0.808	recommended
538258006	Affx-1250302381	AX-584817952	CTCTAACGATCGAATCTTTAGTTAGTTGATAAAAT[G/T]TATTGCCCAATAGGACCATCATCGTCATCGTCTAG	K	2	1	2	1	10192	f		218	mosquito (Aedes albopictus)	chr2.186_18256214	chr2.186	18256214	T	G	standard	0.808	recommended
538121477	Affx-1250165837	AX-584681752	ATTGTGTAACAAAAAGAAACACCGAGTTTTGTAAA[G/T]TATTACATTTTTCGGGACATGAACCAAGACAACTT	K	2	1	2	1	10192	f		218	mosquito (Aedes albopictus)	chr2.17_3891789	chr2.17	3891789	G	T	standard	0.808	recommended
537299639	Affx-1249657304	AX-583862993	TACAAAAAAGTTCTCACGGCCAACCCCAAAAGTAG[A/G]GTCGTGATTGATAATCTTCATCATTTCGTTAGGGG	R	2	1	2	1	10192	r		218	mosquito (Aedes albopictus)	chr1.67_9559021	chr1.67	9559021	G	A	standard	0.808	recommended
537762282	Affx-1249889224	AX-584323841	ATGTTGTCTGACAGCTGCATGCAATGTTTTTGTTT[G/T]GCTATAACTGATTCTTCAGTAGCAGAAACAATTAT	K	2	1	2	1	10192	r		218	mosquito (Aedes albopictus)	chr2.103_1635684	chr2.103	1635684	T	G	standard	0.808	recommended
533330127	Affx-1250718617	AX-579948212	ACCTATGTAATCCAATTTCTCTTCGTCTCACCATA[C/T]TTCAACGTTAGGGCACTAATCACCACAGTCAAGCC	Y	2	1	2	1	10192	f		218	mosquito (Aedes albopictus)	chr2.82_11902597	chr2.82	11902597	C	T	standard	0.808	recommended
535965504	Affx-1248991250	AX-582533025	AGGTAGTGAGCGGTAGCCTTTTATACCCTAAAAGT[G/T]TAGATTAGGTACTAATTAGACCTTCAACATGGAAC	K	2	1	2	1	10192	f		218	mosquito (Aedes albopictus)	chr2.17_29565378	chr2.17	29565378	G	T	standard	0.808	recommended
533350917	Affx-1250728996	AX-579968987	TGCATTGAAATCCTTTCTGTATCCTCTTACAAAAC[A/G]TACACGAACGAACGTCAGTGTTGTCCAAAAATGGC	R	2	1	2	1	10192	f		218	mosquito (Aedes albopictus)	chr2.82_16045826	chr2.82	16045826	G	A	standard	0.808	recommended
534320998	Affx-1251140423	AX-580924127	AAGCAATTAACTATTTTTTGTATAAAACAATAAAT[C/T]CTTTAAAATGAGATTACCGTAAGAGAGCGTTGCTT	Y	2	1	2	1	10192	r		218	mosquito (Aedes albopictus)	chr3.16_2453026	chr3.16	2453026	T	C	standard	0.808	recommended
537363346	Affx-1249691238	AX-583926463	GGTTTAGTATGACGTCGTTGTTTAAAGTATACAGT[A/G]GCATAAACGCCGAGTTAAATTAGGGAGGGGATAAG	R	2	1	2	1	10192	f		218	mosquito (Aedes albopictus)	chr1.7_14057028	chr1.7	14057028	G	A	standard	0.808	recommended
533985584	Affx-1251003986	AX-580597792	ACCGAACCGAAGTAATTTAGGACGAAAATTGTTAT[A/T]TGTAGTCGTTATTCTCTAACTAAACTAAACTATTG	W	4	1	2	1	10192	r		218	mosquito (Aedes albopictus)	chr3.122_5101934	chr3.122	5101934	T	A	standard	0.808	recommended
538033911	Affx-1250078240	AX-584594536	TAAGGTGTATTATCTAAGACAGCATGCCACGAATA[A/G]CTACAGATTTCTGCAATATGCCTGACGTTACACGA	R	2	1	2	1	10192	f		218	mosquito (Aedes albopictus)	chr2.151_10019237	chr2.151	10019237	G	A	standard	0.808	recommended
537775235	Affx-1249896947	AX-584336772	TTGTTAGAAATACATTTCTCTATTAATCCTAGTAA[A/G]ATGTTGAGGTTAATATGACTCAGACAGGTACGCTG	R	2	1	2	1	10192	f		218	mosquito (Aedes albopictus)	chr2.103_3727159	chr2.103	3727159	G	A	standard	0.808	recommended
536117461	Affx-1249067450	AX-582684666	GGTGTATCATGATCAATTTTGGATATATTGTCAAA[C/G]TAACGCAATCGTTACAAATTTTATAATGTTCAGAA	S	4	1	2	1	10192	f		218	mosquito (Aedes albopictus)	chr3.75_2850926	chr3.75	2850926	C	G	standard	0.808	recommended
538414032	Affx-1250458441	AX-584973505	AAGGTTATCGAATTAAGCCTAAAGTTACTGTACGA[C/T]TACTTCTAACTAAATTTTACGTCTAAAGAATCATG	Y	2	1	2	1	10192	f		218	mosquito (Aedes albopictus)	chr2.205_8027288	chr2.205	8027288	T	C	standard	0.808	recommended
534382901	Affx-1251159618	AX-580984594	CATTTCCTCAAGTTTTCTCCCTAATAATAACTGAT[A/T]CAAGTAAAAAATCATTATAATTTGCCTCCAACACC	W	4	1	2	1	10192	f		218	mosquito (Aedes albopictus)	chr3.16_12270888	chr3.16	12270888	A	T	standard	0.808	recommended
535745791	Affx-1248904230	AX-582322760	ACAAGTTGGCACAGCAGCAGCATAACGCTGATTAT[C/T]GTTTCTGTTTGTTCTTTTATTTCCAAAAATCATCC	Y	2	1	2	1	10192	r		218	mosquito (Aedes albopictus)	chr3.70_2795696	chr3.70	2795696	T	C	standard	0.808	recommended
534266144	Affx-1251113817	AX-580870224	AATTTCACAAATGACTAACAATTTCAGTTTCAAAT[C/T]TTATGAAACTTATTAAACTATTTTAGCTAATAACT	Y	2	1	2	1	10192	f		218	mosquito (Aedes albopictus)	chr3.151_6801258	chr3.151	6801258	T	C	standard	0.808	recommended
538576826	Affx-1250106136	AX-585130986	GCAGCATTCGTGGGAGCATAAATTTCCATTCGAGT[G/T]GATTTCAATGGACGCCTGAACTGGTTGGCATCTAT	K	2	1	2	1	10192	r		218	mosquito (Aedes albopictus)	chr2.155_11602486	chr2.155	11602486	G	T	standard	0.808	recommended
538171545	Affx-1250215909	AX-584731704	GAGCAATCATATGCATATCAACGATCCCATTCAAA[C/T]CTTCAATACTGAAAAGAATCCCCGACTACCGTTCT	Y	2	1	2	1	10192	f		218	mosquito (Aedes albopictus)	chr2.177_1946465	chr2.177	1946465	T	C	standard	0.808	recommended
536526476	Affx-1249272221	AX-583092592	CTGCCAAAACATAGCACCATGGTGCTAAGTAAATA[G/T]TCAAATTGTATGAAAAACAGTCACTTTGTACAGAT	K	2	1	2	1	10192	f		218	mosquito (Aedes albopictus)	chr1.102_2373586	chr1.102	2373586	G	T	standard	0.808	recommended
533417700	Affx-1250761080	AX-580035733	AATCGTAAAAATCGTAAACAAATGAGTGGAAAGTG[C/G]ACTTTAATTTATTTTGCGGAGTTGTAATATAAATT	S	4	1	2	1	10192	r		218	mosquito (Aedes albopictus)	chr2.87_5021425	chr2.87	5021425	C	G	standard	0.808	recommended
538139243	Affx-1250183607	AX-584699484	GATGGTGATGCATATCGATGTGGGCTTTATATGAA[A/T]TATATTTTACTGAAGGGGACTCGATAGATGGAGGG	W	4	1	2	1	10192	f		218	mosquito (Aedes albopictus)	chr2.175_1317658	chr2.175	1317658	A	T	standard	0.808	recommended
536126663	Affx-1249071508	AX-582693851	CCCTGAAGAACGTTGCGTTAGTGTTGGGAGTGTGA[C/T]TATTGGTTGAGTTTCATTTGGGAACTGGAAGATCA	Y	2	1	2	1	10192	r		218	mosquito (Aedes albopictus)	chr3.75_4127221	chr3.75	4127221	T	C	standard	0.808	recommended
536342559	Affx-1249179203	AX-582909255	CAAGATTGGAAGTTCGATTGGCGAGCTGGTCGAGC[A/G]TTTGCGACCATTTCAGGACAGCTGTATCATCCGGA	R	2	1	2	1	10192	r		218	mosquito (Aedes albopictus)	chr3.78_2866608	chr3.78	2866608	A	G	standard	0.808	recommended
536165238	Affx-1249090810	AX-582732342	TAGGACTTGAATATCTTTTGTGATATCGCACGTTT[C/T]CCATTATTGATTGGTCTTCCAAGTTTAGAAGTTGT	Y	2	1	2	1	10192	r		218	mosquito (Aedes albopictus)	chr3.75_11075052	chr3.75	11075052	T	C	standard	0.808	recommended
533237086	Affx-1250672067	AX-579855242	ACCCCGATTTCACACAAAAACTCATATTAACGACA[A/G]ATGCTTTAGACATCGGATGTGGAGCTGTCTTATCT	R	2	1	2	1	10192	f		218	mosquito (Aedes albopictus)	chr2.63_830982	chr2.63	830982	G	A	standard	0.808	recommended
538006135	Affx-1250050452	AX-584566940	TTTCAACATTTTGGCATCATGGCCTGGAAATGAAA[A/G]AAAACATTGCTATTTGATGGCCCTACGTGGAATCA	R	2	1	2	1	10192	f		218	mosquito (Aedes albopictus)	chr2.140_19284835	chr2.140	19284835	A	G	standard	0.808	recommended
533782588	Affx-1250924594	AX-580397494	ATCTTGAACGGGTTCTTTACAGAATCCCATTAGGA[G/T]TCTATGCAAATTCATGACCGGATTCTTTGAGAAGA	K	2	1	2	1	10192	r		218	mosquito (Aedes albopictus)	chr3.109_1144585	chr3.109	1144585	T	G	standard	0.808	recommended
538075717	Affx-1250120068	AX-584636110	GCTCAATATTTATAACAAACGACGTGGCAAAACAT[A/T]CAATCCGTCTCGCTTATGTTCGCTTCACGCAAAAG	W	4	1	2	1	10192	f		218	mosquito (Aedes albopictus)	chr2.161_407057	chr2.161	407057	A	T	standard	0.808	recommended
535183726	Affx-1251436978	AX-581768961	AGAATAGGAAGTATTAAGGAGAGTTAAATGGCTGA[A/T]TGTGTATTATCACTATACAGAAGAAAATGCATTGT	W	4	1	2	1	10192	f		218	mosquito (Aedes albopictus)	chr3.32_4820204	chr3.32	4820204	T	A	standard	0.808	recommended
535876254	Affx-1248952923	AX-582447818	TATCAATAGCGAAAAAGGAAAGAAGAAATGTTAAA[A/G]TAATGCACCGGAGGTAAAAGATGGTTACACCTGAA	R	2	1	2	1	10192	f		218	mosquito (Aedes albopictus)	chr2.17_14640940	chr2.17	14640940	G	A	standard	0.808	recommended
538416470	Affx-1250460879	AX-584975934	TCGTTTGTATTTATTTTCTATACAAATCGCGTAAA[A/G]TAATAAAAATGTACATAACTATTAGATGCCGGCGC	R	2	1	2	1	10192	f		218	mosquito (Aedes albopictus)	chr2.205_8793234	chr2.205	8793234	A	G	standard	0.808	recommended
533627194	Affx-1250863900	AX-580244759	TTTATTTAAGTAGGAAACCCAACTCCTAATATAAG[A/T]ATCTCTCTCGGAAATCAGAGTTTTGAAAGGTTCAA	W	4	1	2	1	10192	f		218	mosquito (Aedes albopictus)	chr2.97_5296403	chr2.97	5296403	A	T	standard	0.808	recommended
537777151	Affx-1249896643	AX-584338683	ATAAAATAAAAATCCAATGCGGGCGAAATGAAATA[A/G]TATTGAATGATTCGAGATATAATCAAAACCATGAA	R	2	1	2	1	10192	r		218	mosquito (Aedes albopictus)	chr2.103_3665609	chr2.103	3665609	A	G	standard	0.808	recommended
538349818	Affx-1250394211	AX-584909504	AACCATTTTTCATGCCTTAACAGGAAGAAATAAGA[G/T]AATTGATAGCATTTCCTCAAAGAATAAAAATAGAA	K	2	1	2	1	10192	f		218	mosquito (Aedes albopictus)	chr2.196_8061075	chr2.196	8061075	T	G	standard	0.808	recommended
536289456	Affx-1249153615	AX-582856317	ATTTCCGATTGTGTCCGGATTCAAAGTCAAACTGA[A/G]AGAAATTCAATACCAAAGCGAGCTGATTCAAATAA	R	2	1	2	1	10192	f		218	mosquito (Aedes albopictus)	chr3.77_12735989	chr3.77	12735989	G	A	standard	0.808	recommended
537767544	Affx-1249893079	AX-584329092	TTAGTTATTTCGCTAATATACATAGTTACTTCAAA[C/T]ATGTTTTTGGAGGGATGTATCATAATAATGGAGCC	Y	2	1	2	1	10192	f		218	mosquito (Aedes albopictus)	chr2.103_2359838	chr2.103	2359838	T	C	standard	0.808	recommended
533542451	Affx-1250824587	AX-580160367	AAGCCCTAAACTTGGTGTTAAAAGTGCGGCCAATA[C/T]CAAAATGAATAACAATCTCGATGATGATAGCAGCA	Y	2	1	2	1	10192	f		218	mosquito (Aedes albopictus)	chr2.87_30588866	chr2.87	30588866	C	T	standard	0.808	recommended
537106693	Affx-1249562862	AX-583670944	CCTCCCCTATGTCCATACGCTGGGAAAAGAAAATG[C/T]GAACGCAAAATGGGAAATATTATCCGAAGGCACCC	Y	2	1	2	1	10192	f		218	mosquito (Aedes albopictus)	chr1.36_362170	chr1.36	362170	T	C	standard	0.808	recommended
532985274	Affx-1250545979	AX-579603569	TATTTACAGGTATGAATATTTACAGTCAACCAAAA[C/T]TCTTGGGGATTACTTTCCTCTAGGTGGATAAATCG	Y	2	1	2	1	10192	f		218	mosquito (Aedes albopictus)	chr2.38_3810049	chr2.38	3810049	T	C	standard	0.808	recommended
534215880	Affx-1251097132	AX-580821420	GTGAATAATTCGGATGCTCTCGCCAGTGAGATTAA[A/G]TTTAGACTGTTGTACAGTCGCAGTTATATGTTAAG	R	2	1	2	1	10192	r		218	mosquito (Aedes albopictus)	chr3.151_1374149	chr3.151	1374149	G	A	standard	0.808	recommended
538178848	Affx-1250223212	AX-584738993	TAGTTGTCTACTAGGTAATGACTTTGATGAACGAA[C/T]GCTGACAGACAGTAGCAGCAACGCTATATGTAAGA	Y	2	1	2	1	10192	f		218	mosquito (Aedes albopictus)	chr2.177_4711698	chr2.177	4711698	C	T	standard	0.808	recommended
536859245	Affx-1249438773	AX-583424330	TAAATTAAAATCGCAATCGTTTGGTAGTTGGTAAA[G/T]TAGCTCATGTTCTCCTATCAAATTGGTCAATTCTA	K	2	1	2	1	10192	f		218	mosquito (Aedes albopictus)	chr1.147_4860071	chr1.147	4860071	T	G	standard	0.808	recommended
538624680	Affx-1250154008	AX-585178622	TTGCGTAAGCATAATATATTTATGAAACCATAACT[A/G]CTTGCTTCGGTTTTCTATAAGGCACATATTATACC	R	2	1	2	1	10192	r		218	mosquito (Aedes albopictus)	chr2.168_441798	chr2.168	441798	G	A	standard	0.808	recommended
536221983	Affx-1249119162	AX-582788981	GCAGATGACTAGCTTGAATTTAAATTGATTTTCTC[A/C]AGCTTTGATCATTGCATACATTAGCACACGAATGT	M	2	1	2	1	10192	r		218	mosquito (Aedes albopictus)	chr3.75_21470867	chr3.75	21470867	A	C	standard	0.808	recommended
536807259	Affx-1249411574	AX-583372486	TTTGATGAACAAACTAAGTGTTGTCGAAAATCTTA[C/T]TTGTAACTTTAAAAATCAACTACTAAACCTATGAC	Y	2	1	2	1	10192	r		218	mosquito (Aedes albopictus)	chr1.144_2301466	chr1.144	2301466	C	T	standard	0.808	recommended
536954111	Affx-1249484944	AX-583518953	ACAGTTTGTTCGTTTCCGCGTCGAATAGCATTTGA[A/G]CATTTTCGTCATCAAACATTGTACGATTCACTCTC	R	2	1	2	1	10192	r		218	mosquito (Aedes albopictus)	chr1.152_4022940	chr1.152	4022940	G	A	standard	0.808	recommended
535155963	Affx-1251425723	AX-581741479	CCAGTACGCATGAATTGTGAGAGAAAATCTTAGAT[C/T]GCAATCAATTAGTTCGGCTATTGAATTAAAGTATG	Y	2	1	2	1	10192	f		218	mosquito (Aedes albopictus)	chr3.3_222501	chr3.3	222501	T	C	standard	0.808	recommended
538588723	Affx-1250118043	AX-585142801	ATTGTGTTCGTCATACTGGAGGGTGTGCTCATCGG[A/T]TTCGTTCATTTCACACGCTTGGAGAATTTTACGGG	W	4	1	2	1	10192	r		218	mosquito (Aedes albopictus)	chr2.157_973891	chr2.157	973891	T	A	standard	0.808	recommended
533133376	Affx-1250620094	AX-579751592	GAGAAATCAAGAAATCAGAAAGCAACAGTACTAAG[C/T]ATCTGCACAACAAAATAAAAAGCAACTTTTTCTCA	Y	2	1	2	1	10192	f		218	mosquito (Aedes albopictus)	chr2.60_1426559	chr2.60	1426559	C	T	standard	0.808	recommended
534130736	Affx-1251074773	AX-580742203	AAGCTTTGATTAATTACCCGAGATTTCGATTGAGC[A/G]AAAAATATCATCCAAAGTCTGCTTATTGCATGTAA	R	2	1	2	1	10192	f		218	mosquito (Aedes albopictus)	chr3.145_5681033	chr3.145	5681033	A	G	standard	0.808	recommended
533945259	Affx-1250985076	AX-580557554	TCCGAATTGTACTCCGACGTGGTCAGTTCGGAAAT[C/T]TTCATGATAGGCATCTTCTCTAGCAGGGCTGCCCT	Y	2	1	2	1	10192	r		218	mosquito (Aedes albopictus)	chr3.12_2077624	chr3.12	2077624	T	C	standard	0.808	recommended
536492366	Affx-1249254174	AX-583058583	GAATAAAGCTGTGGAACAGATAACTATTTATTAAT[C/T]TTTAACTAGACGAACGATTCTCTATACGTTGATGT	Y	2	1	2	1	10192	r		218	mosquito (Aedes albopictus)	chr1.10_10639248	chr1.10	10639248	T	C	standard	0.808	recommended
534368873	Affx-1251156526	AX-580970664	TAGAGAGAAATTCGAGAAGCTGCCACAACGTTGTC[A/G]TTCAGTATATGTCAGCTACTTATCGTGTCTTCTAT	R	2	1	2	1	10192	r		218	mosquito (Aedes albopictus)	chr3.16_11293109	chr3.16	11293109	G	A	standard	0.808	recommended
536792591	Affx-1249404280	AX-583357858	CCGACATTTGACACCCGATCCGAGATTGCAAGTCG[A/G]TTCTAATTAAAGCATAGTGGTACCGGCTCCTATCA	R	2	1	2	1	10192	r		218	mosquito (Aedes albopictus)	chr1.142_422184	chr1.142	422184	G	A	standard	0.808	recommended
537737780	Affx-1249876983	AX-584299448	TCGCCCGCCGCACGCAGAGCGGATGATGTGATTTT[C/T]TGATGTATTTGTCTTCGAAGACAGACTTGACCTGT	Y	2	1	2	1	10192	r		218	mosquito (Aedes albopictus)	chr2.100_2373481	chr2.100	2373481	C	T	standard	0.808	recommended
535581253	Affx-1248847336	AX-582160840	GCAATCTGCAGTGCGTGGCAATTATTATACGGAAA[A/T]CTACTGCGTTTTCATCTCTATCGTTATTGTTCAAA	W	4	1	2	1	10192	r		218	mosquito (Aedes albopictus)	chr3.66_5141280	chr3.66	5141280	T	A	standard	0.808	recommended
538759347	Affx-1250288690	AX-585312919	CATTTTTTTTAGTAAAAAAAAGCTTTAACCATCAG[A/T]GTAATATGCACTCTCATCAAAATACTACACGCTTA	W	4	1	2	1	10192	r		218	mosquito (Aedes albopictus)	chr2.186_13737297	chr2.186	13737297	T	A	standard	0.808	recommended
533933793	Affx-1250980824	AX-580546155	CGGTCATAAGTCAAATGGCCTAACGAGAAATTTTC[A/G]TTTGTAATTAGTGGCAATTTCAATTTTAGTTAAGG	R	2	1	2	1	10192	r		218	mosquito (Aedes albopictus)	chr3.119_3223798	chr3.119	3223798	G	A	standard	0.808	recommended
533582516	Affx-1250844574	AX-580200385	TAATATGGTAGTAAAATTCGTGAGCATAATATCCT[A/T]ACTGCTGGTCCAAAAATAGCTATTGATTCAGCTTA	W	4	1	2	1	10192	f		218	mosquito (Aedes albopictus)	chr2.95_3120438	chr2.95	3120438	A	T	standard	0.808	recommended
535996024	Affx-1249006526	AX-582563492	TTTTCAGTACTTCAATTCCATGACCTCCGAGCTAA[A/G]CAATATAAACCAGATATTATATATGGCGTACAGTC	R	2	1	2	1	10192	f		218	mosquito (Aedes albopictus)	chr2.17_36501441	chr2.17	36501441	G	A	standard	0.808	recommended
534885143	Affx-1251319198	AX-581473052	TTGTCAGAAACAATATAACTATTAGAAATTCGATA[A/G]AAGTTAATACTCTTTCATGGTACCTTACATCAAAA	R	2	1	2	1	10192	f		218	mosquito (Aedes albopictus)	chr3.180_7551296	chr3.180	7551296	G	A	standard	0.808	recommended
538843369	Affx-1250372726	AX-585396704	AGCTTTGATTAGATCGATTGATGCAAATTATTTAA[A/T]TAATGTGATGGAAATAAGTAAATGAATGTGATTGG	W	4	1	2	1	10192	r		218	mosquito (Aedes albopictus)	chr2.190_869520	chr2.190	869520	A	T	standard	0.808	recommended
536684910	Affx-1249350463	AX-583250441	AGAAGCGATTACTGGCTCTAATAAATTGTGTTTTC[A/T]AGTTTTACAGGACCCTTTCCAAGCCTTTGAAACCA	W	4	1	2	1	10192	r		218	mosquito (Aedes albopictus)	chr1.131_2956236	chr1.131	2956236	A	T	standard	0.808	recommended
537013353	Affx-1249514367	AX-583578037	GCCTGGTTGGATTGGATCCTACGTTTGCCTTCACT[G/T]ACTTTCTTTTCGGTATGATGAACTCCGCAGCACAA	K	2	1	2	1	10192	r		218	mosquito (Aedes albopictus)	chr1.170_2520642	chr1.170	2520642	G	T	standard	0.808	recommended
538895266	Affx-1250424640	AX-585448408	CCACCTCCATCCGGACTGTAATCTAAATGTAATTA[A/T]ACTTTTATCTAAATCTCCTGCTAAATCTATTAATC	W	4	1	2	1	10192	r		218	mosquito (Aedes albopictus)	chr2.198_4038847	chr2.198	4038847	A	T	standard	0.808	recommended
533445615	Affx-1250775031	AX-580063611	CCGAGACCGTGGCATAGATGTTATGTGATCAAATC[C/T]CTAGTTTAGCCATTCTCTCGCAAAAGGTGTTGTGA	Y	2	1	2	1	10192	r		218	mosquito (Aedes albopictus)	chr2.87_9850635	chr2.87	9850635	C	T	standard	0.808	recommended
533124438	Affx-1250614656	AX-579742667	AAATTGATTAAATTTCAAAGAAACAATAACTGTTT[A/G]GAATTGTGAAATAGTTAAAGTAGAATGTGAACCGA	R	2	1	2	1	10192	r		218	mosquito (Aedes albopictus)	chr2.57_1000269	chr2.57	1000269	A	G	standard	0.808	recommended
536297320	Affx-1249156655	AX-582864170	TCATATTTGTATTCTCTGAAGGTTCTCCTTAATAT[C/T]ATTGCTTACTCGTTGCTCTACTTCTTTTTGATTTA	Y	2	1	2	1	10192	r		218	mosquito (Aedes albopictus)	chr3.77_13849561	chr3.77	13849561	C	T	standard	0.808	recommended
537239213	Affx-1249627146	AX-583802944	TATAACGTATTCGTTTTGATGATTTAATGTAACAT[A/G]AATTGTACATTACCTTACTAATTTTGTGCAGTGGA	R	2	1	2	1	10192	r		218	mosquito (Aedes albopictus)	chr1.50_15144300	chr1.50	15144300	G	A	standard	0.808	recommended
536760161	Affx-1249388000	AX-583325504	ATTTCCAGGACCGTGCTCTCCATCCCCCGACCGTT[C/T]GGTTATCAACATTACCAAACACCATAATGACCGGG	Y	2	1	2	1	10192	r		218	mosquito (Aedes albopictus)	chr1.139_7059609	chr1.139	7059609	C	T	standard	0.808	recommended
536289638	Affx-1249153705	AX-582856499	TGCAGCGTGTCCTTTGCTATCATTGACCTCATTCA[A/T]ATTGGCCATAATCAACCCTAATGCGCTGAAACATC	W	4	1	2	1	10192	f		218	mosquito (Aedes albopictus)	chr3.77_12787517	chr3.77	12787517	T	A	standard	0.808	recommended
537999184	Affx-1250043499	AX-584560002	AATTGTTGGGAAAAAGAGATTATCCTTCAGTATGA[C/T]TGATTTGCTACATCAAACATCGCAACCGGACGAGA	Y	2	1	2	1	10192	f		218	mosquito (Aedes albopictus)	chr2.140_15610280	chr2.140	15610280	T	C	standard	0.808	recommended
536458920	Affx-1249237484	AX-583025267	AGAAGAAACTTATCAAGGGATGCATTTGGAAAACA[A/G]TTCATGGATATATTCTGACACTACTCCTTAGATAA	R	2	1	2	1	10192	r		218	mosquito (Aedes albopictus)	chr3.95_4068418	chr3.95	4068418	A	G	standard	0.808	recommended
534954673	Affx-1251347157	AX-581541896	CTCGCATTTATCACAAGTGAGTTATCGATCATTAA[A/G]ATTTTAGCGCAAAACGTTATTCGGTTTTCCAACAT	R	2	1	2	1	10192	f		218	mosquito (Aedes albopictus)	chr3.2_960710	chr3.2	960710	A	G	standard	0.808	recommended
538342904	Affx-1250387294	AX-584902620	CCACGCAATAGAATTACTTATTCCAATCGCACCAA[A/T]TCGGAACCGCTGGCATTGAACACCTTCCAGTTATC	W	4	1	2	1	10192	f		218	mosquito (Aedes albopictus)	chr2.196_3702316	chr2.196	3702316	T	A	standard	0.808	recommended
538361456	Affx-1250405851	AX-584921111	AACAGGCCAGGAATCTTTGTTCGATAATCCGCAAA[A/G]TATCTTTCTGGAAATTAGTGAATCTCGGTACGATA	R	2	1	2	1	10192	f		218	mosquito (Aedes albopictus)	chr2.196_12413931	chr2.196	12413931	G	A	standard	0.808	recommended
533064382	Affx-1250585521	AX-579682646	TCGAGAACAAGTGATATTTGTAGATGGATAACTGA[A/C]TGCAATATGTTCTTGTCTTATTCCATAAATGCACC	M	2	1	2	1	10192	f		218	mosquito (Aedes albopictus)	chr2.42_14146836	chr2.42	14146836	C	A	standard	0.808	recommended
533080224	Affx-1250593483	AX-579698475	ACAATTCACAAACATTGACAATACCGGCAGGTACA[A/T]ATTCCACCTCCTCTTCATACCTGCTCGTGGAACTG	W	4	1	2	1	10192	f		218	mosquito (Aedes albopictus)	chr2.48_2680367	chr2.48	2680367	A	T	standard	0.808	recommended
533468052	Affx-1250787558	AX-580086028	TTCATGCTGTATTTATTTTAGAATGGTAAAATAGT[G/T]AACTTTGTTTAATTTTCCACATTTTTTGCGTCATA	K	2	1	2	1	10192	f		218	mosquito (Aedes albopictus)	chr2.87_14969993	chr2.87	14969993	T	G	standard	0.808	recommended
535127264	Affx-1251415255	AX-581713140	CATCAACCTATATCAAACCGTCATTCACGAAACTA[C/T]ATGACGGCGCATGACCTAGTGGGCACAATATGGAT	Y	2	1	2	1	10192	f		218	mosquito (Aedes albopictus)	chr3.29_1707066	chr3.29	1707066	C	T	standard	0.808	recommended
538507845	Affx-1250037130	AX-585062386	AGCAGCTGATGAGCATGGAAAATACAGTAGAATTT[C/T]CATTTTATAATCGGGAAAAACTGGATCTGGATGAA	Y	2	1	2	1	10192	r		218	mosquito (Aedes albopictus)	chr2.140_12916879	chr2.140	12916879	C	T	standard	0.808	recommended
538552102	Affx-1250081405	AX-585106391	GTTAATATTTCTCGATGTTGGTTTTTCAATAGCGA[A/T]TTACGCTTATGACTTCGTATATATGTAAGGCAACA	W	4	1	2	1	10192	r		218	mosquito (Aedes albopictus)	chr2.151_12264529	chr2.151	12264529	T	A	standard	0.808	recommended
536148631	Affx-1249083012	AX-582715777	GGTATGCGAGATGAAGGATCTACACCATTTGAACA[A/C]TAGAAAAACATAATAGTTGAAGATCAAACAAATAA	M	2	1	2	1	10192	f		218	mosquito (Aedes albopictus)	chr3.75_8004094	chr3.75	8004094	A	C	standard	0.808	recommended
538680954	Affx-1250210288	AX-585234738	GGGGAGTTAATGAACATGGCTTCCTCTCGATTGTG[A/G]CTGATTTCACAGTTGACCAATTTGATAGATTCGTT	R	2	1	2	1	10192	r		218	mosquito (Aedes albopictus)	chr2.176_788008	chr2.176	788008	A	G	standard	0.808	recommended
537747361	Affx-1249882953	AX-584308968	ACAACGAGTAATGAATGTAAAGTAATTTTCACCAA[A/G]ATAAAGCAAGGACAAATAAAATTATTTTTTTCTTG	R	2	1	2	1	10192	f		218	mosquito (Aedes albopictus)	chr2.102_1227575	chr2.102	1227575	A	G	standard	0.808	recommended
535035040	Affx-1251379219	AX-581621771	GATTCGGACACAGATCTGATCACGAGATTTCAAGA[G/T]CATGAGGTGCCATCACAATCGGCTGCGGATGCCTT	K	2	1	2	1	10192	f		218	mosquito (Aedes albopictus)	chr3.20_11625309	chr3.20	11625309	G	T	standard	0.808	recommended
537224429	Affx-1249619787	AX-583788214	CGCACAATCTCCCAAGAGCACGAAAGTATACTTTC[A/T]TTCTGCTGCTGAATAAAAGATTACTATAAAGCACA	W	4	1	2	1	10192	r		218	mosquito (Aedes albopictus)	chr1.50_10850060	chr1.50	10850060	T	A	standard	0.808	recommended
535809831	Affx-1248926064	AX-582382440	ATCATTCTCTCTGATTTCTCTCCATTTCTTTCTCA[A/T]TTCCTAAATGATAAACCTCCGTAAAACTTACAAAT	W	4	1	2	1	10192	r		218	mosquito (Aedes albopictus)	chr3.74_749242	chr3.74	749242	T	A	standard	0.808	recommended
536816864	Affx-1249417549	AX-583382070	TACGTGACTCGCAAGATGGTTATTATGTGCCGAAA[C/T]TCTTCCTTGTTGATAATTAGCAGCGATCAGAATTC	Y	2	1	2	1	10192	f		218	mosquito (Aedes albopictus)	chr1.144_4903834	chr1.144	4903834	C	T	standard	0.808	recommended
537275989	Affx-1249647694	AX-583839482	CATCCATAGAAATCACCTCATCATCAAACTTAATA[A/G]CCTTCACATTTACTCAATCATGCTATGTTATTCAC	R	2	1	2	1	10192	f		218	mosquito (Aedes albopictus)	chr1.67_2484047	chr1.67	2484047	A	G	standard	0.808	recommended
534815187	Affx-1251294990	AX-581404315	GATTATGGCTGTCATGAATAAACCAGATGATAATG[A/G]GCCAACGAATGTGAACAAGAACACGTGGATTGCGG	R	2	1	2	1	10192	f		218	mosquito (Aedes albopictus)	chr3.180_317847	chr3.180	317847	G	A	standard	0.808	recommended
537859884	Affx-1249939229	AX-584421199	TAATCACTAACAGGAGCTTTGTTTCAATAATCGAA[G/T]GCTCGATTGTTACCGAATGGTTTTGGGAATATCCG	K	2	1	2	1	10192	f		218	mosquito (Aedes albopictus)	chr2.107_7385661	chr2.107	7385661	T	G	standard	0.808	recommended
535260263	Affx-1251466766	AX-581844730	TACCTAATTCCTATTTCTACGGATTGTTGGCAGAA[A/G]CCGAGCATTCCAACGCATGCATTGATAGAAACCAC	R	2	1	2	1	10192	f		218	mosquito (Aedes albopictus)	chr3.45_866740	chr3.45	866740	A	G	standard	0.808	recommended
536035338	Affx-1249025869	AX-582602696	AATGTTCCACCCCCCTTCAATACGGCCTTGAAGAA[C/T]ATTAGAGAAGGTTCTAGCGAAAATAAGGTAAAAAT	Y	2	1	2	1	10192	r		218	mosquito (Aedes albopictus)	chr2.172_395030	chr2.172	395030	T	C	standard	0.808	recommended
533894370	Affx-1250966834	AX-580508983	AGTATACGTACAATGAAACCTCTAGGACATTACAA[A/C]CTATTTTTTGATCATTCCACGTAGAATCCAAATAT	M	2	1	2	1	10192	f		218	mosquito (Aedes albopictus)	chr3.116_6790934	chr3.116	6790934	A	C	standard	0.808	recommended
532964745	Affx-1250534974	AX-579583043	TCCAGTATTTCCAGTCTCGATAAGCACTCCTCGTT[C/T]TGTTCTGTATCTATTCCACTTTGGTCTTGAATGAA	Y	2	1	2	1	10192	r		218	mosquito (Aedes albopictus)	chr2.36_6519058	chr2.36	6519058	T	C	standard	0.808	recommended
532966667	Affx-1250535932	AX-579584964	CAGAGAAAACAACAAACCTTAATTTGCTAATAGGT[A/G]TATTTATTCCAAGCGTATGTTTAAAACAACGATTG	R	2	1	2	1	10192	r		218	mosquito (Aedes albopictus)	chr2.36_6864099	chr2.36	6864099	A	G	standard	0.808	recommended
533541182	Affx-1250823952	AX-580159099	TATGTTGTTGCTTAAAATTGAAGCTATCATAAATG[A/T]AAGACAAATATTTGCATAAGCTTGAGCATTGTAAT	W	4	1	2	1	10192	f		218	mosquito (Aedes albopictus)	chr2.87_30437703	chr2.87	30437703	A	T	standard	0.808	recommended
538845618	Affx-1250374978	AX-585398933	AAAGCTGTCGTGCCACTTTTCTTACTACGATACTG[C/T]ATTTCACGGTAGGGATTATCGATATGTCAAGAATT	Y	2	1	2	1	10192	r		218	mosquito (Aedes albopictus)	chr2.193_500852	chr2.193	500852	C	T	standard	0.808	recommended
533302374	Affx-1250704729	AX-579920470	AACCCGACAATCATTTTCAGACACAATCTACATCA[C/T]TATCTTGAGTTCTTCAAGGCGATTCGGAAACATGT	Y	2	1	2	1	10192	f		218	mosquito (Aedes albopictus)	chr2.82_4409145	chr2.82	4409145	C	T	standard	0.808	recommended
534083298	Affx-1251053264	AX-580695088	TGTTTTATAACCACATTCCAACGTGTGTTGATTCG[A/T]TTCGATAATCAAAATCACCATTGAACCAAATTATC	W	4	1	2	1	10192	r		218	mosquito (Aedes albopictus)	chr3.142_704619	chr3.142	704619	A	T	standard	0.808	recommended
534682019	Affx-1251250102	AX-581275464	ATTTCAATTTTCCCTTCTAGAGAAGACGATGAAGC[A/G]GTTCAGGAAATTCCGAGTATGCCTGGCGTAGCCAG	R	2	1	2	1	10192	r		218	mosquito (Aedes albopictus)	chr3.170_7408033	chr3.170	7408033	A	G	standard	0.808	recommended
538629028	Affx-1250158356	AX-585182956	GTCTGTTTTCGGAATTTAAGTTTATTCACTTGCTC[A/G]CAGTTCTTACCGTTATTTGTGCACAGGACACCGTC	R	2	1	2	1	10192	r		218	mosquito (Aedes albopictus)	chr2.17_876197	chr2.17	876197	G	A	standard	0.808	recommended
536187997	Affx-1249102237	AX-582755062	ATTTTAGTTCTGAAATTGAGTAATTCAGTTGAAAT[A/G]CTATATACTATATGTTGGTCATTGCCCACAATATC	R	2	1	2	1	10192	r		218	mosquito (Aedes albopictus)	chr3.75_14992203	chr3.75	14992203	A	G	standard	0.808	recommended
533549661	Affx-1250827123	AX-580167568	TTGTGCAACAAATTTGTAACAATGTACGACGTATT[C/G]ACTGTTCTTTCTTCGCGGAACAAATCTATAAATCC	S	4	1	2	1	10192	r		218	mosquito (Aedes albopictus)	chr2.87_32298988	chr2.87	32298988	C	G	standard	0.808	recommended
535498771	Affx-1248822188	AX-582080173	AGTACACTGACCTCTTCTGTAGTTCTGTAGTTTGA[A/T]TAGAAAGACTTTGTTCTGATTTGTCACTCAATGGC	W	4	1	2	1	10192	r		218	mosquito (Aedes albopictus)	chr3.61_1025687	chr3.61	1025687	A	T	standard	0.808	recommended
533677339	Affx-1250881523	AX-580294226	AACGCGAGCGGAAAAATAATATGACGTTAAAGACT[C/T]GGTAAACTCGCTCGCAGGACCATCCAACCCGCTCG	Y	2	1	2	1	10192	f		218	mosquito (Aedes albopictus)	chr2.97_12497125	chr2.97	12497125	C	T	standard	0.808	recommended
536559109	Affx-1249287515	AX-583125121	ATGCACTATGCCCAGGAACGCGCAAATAATCATCA[A/T]TTATTTAGTTATACACAGCTATTTCAGTGCACACA	W	4	1	2	1	10192	r		218	mosquito (Aedes albopictus)	chr1.106_7143032	chr1.106	7143032	A	T	standard	0.808	recommended
536041290	Affx-1249028869	AX-582608639	TCTCTCCCTGTCTGGCCATCGAACAAGTACGTAGT[A/G]GTTTTTCACTCTTAAGCAGCATTATTCAACTGAAT	R	2	1	2	1	10192	r		218	mosquito (Aedes albopictus)	chr2.172_1710040	chr2.172	1710040	A	G	standard	0.808	recommended
533187698	Affx-1250647298	AX-579805865	TGGCTGCAGAATATTGCAAAAAGGAATAGTTGAAC[C/T]AATACGATTGTTTGTTGTAGCAGGGTGAGTCTAAA	Y	2	1	2	1	10192	f		218	mosquito (Aedes albopictus)	chr2.60_15653559	chr2.60	15653559	T	C	standard	0.808	recommended
533204086	Affx-1250655511	AX-579822250	TTTTAAAACTATCCAGTCGGAATAAGAATAGGTAC[A/G]GACTTGCAGCATTGCTGCATCATTGATTCCGGAGT	R	2	1	2	1	10192	f		218	mosquito (Aedes albopictus)	chr2.61_1664047	chr2.61	1664047	G	A	standard	0.808	recommended
535997872	Affx-1249007240	AX-582565339	GATTGTTGCCGGCTGTTTCCAGAGGAGCGAAGGGT[G/T]TTGCACTCTTCACATTTTAAAACTGATCTTCCTGT	K	2	1	2	1	10192	r		218	mosquito (Aedes albopictus)	chr2.17_36721310	chr2.17	36721310	G	T	standard	0.808	recommended
534838472	Affx-1251303797	AX-581427155	AAGGGATCGAAAGGATCCAAAGAGACAAGACAGTA[C/T]TTTATTCTTGAGCAGGTGTTAGTTAGCTGAAATAA	Y	2	1	2	1	10192	r		218	mosquito (Aedes albopictus)	chr3.180_3034060	chr3.180	3034060	C	T	standard	0.808	recommended
538098858	Affx-1250143213	AX-584659182	GCCCGTTGAATTAACACGACGTAGTGCAGATAAAC[C/T]CTCGAACGCTCCGATTCTAGCAGTGCATCGTGACT	Y	2	1	2	1	10192	f		218	mosquito (Aedes albopictus)	chr2.167_1318652	chr2.167	1318652	T	C	standard	0.808	recommended
535201413	Affx-1251443432	AX-581786467	GAGTTCTACTACACTACATTTGGACTTTTCCATTA[C/T]CCAAATTTCGTCTCCCTCATCCTCAAATACGTGTC	Y	2	1	2	1	10192	f		218	mosquito (Aedes albopictus)	chr3.39_888455	chr3.39	888455	C	T	standard	0.808	recommended
534493674	Affx-1251193811	AX-581093011	CCTTAGACTAGTTTCAAGTTATCAAAGGAAGAATG[C/T]CTGAAAAAATCCTGGAGGAATCTCTAAAACAGACA	Y	2	1	2	1	10192	f		218	mosquito (Aedes albopictus)	chr3.166_5531021	chr3.166	5531021	C	T	standard	0.808	recommended
535364985	Affx-1251500981	AX-581948114	GAATCAATTGGAATAGCTTAATACCTCTTAGTTTT[A/G]ATTGATGTTGCTGAAATAGTGAATAATAAAAGAAA	R	2	1	2	1	10194	f		218	mosquito (Aedes albopictus)	chr3.49_2988647	chr3.49	2988647	A	G	standard	0.806	recommended
534238379	Affx-1251104700	AX-580843282	TTAGCATCTCTTTCTAATCATATCCTTTTACCCTC[A/G]ATTTCAGATTATGCTGGTCCATATCTTCACATCGA	R	2	1	2	1	10194	r		218	mosquito (Aedes albopictus)	chr3.151_4132654	chr3.151	4132654	A	G	standard	0.806	recommended
533063352	Affx-1250584255	AX-579681616	TATAAATGCTTGTTTGCGTTGTACATATAGTTGTA[C/T]TTGTATTCGTTTCGAGTTGGACAGTGTTGCGCTTG	Y	2	1	2	1	10194	r		218	mosquito (Aedes albopictus)	chr2.42_13690855	chr2.42	13690855	T	C	standard	0.806	recommended
532863598	Affx-1250485078	AX-579481930	TCTGCTTTAGAGATTAGTCGCAATTAAAACTCGCC[A/C]ATAATTACACACGCTGACGACAGTAATGGAACACT	M	2	1	2	1	10194	f		218	mosquito (Aedes albopictus)	chr2.22_7472925	chr2.22	7472925	C	A	standard	0.806	recommended
537325067	Affx-1249672212	AX-583888304	CTACATAGGAAGACTGACTCTCCATGAGAACAGAT[C/G]GATCCAGTGACAATGAGGCGTGTGCTGCATCCGGA	S	4	1	2	1	10194	f		218	mosquito (Aedes albopictus)	chr1.7_6023314	chr1.7	6023314	G	C	standard	0.806	recommended
536007067	Affx-1249012107	AX-582574517	GACTGGAATTTCGTAAAACACTAGAGGGTTTCAAT[A/T]AAGAACATCTGAGAGAGTTTCAGAGTGAACTTCCG	W	4	1	2	1	10194	f		218	mosquito (Aedes albopictus)	chr2.17_38566562	chr2.17	38566562	T	A	standard	0.806	recommended
533353634	Affx-1250730334	AX-579971702	ATTTGGTACATAAGAGGTATTGTTAATCAAGGAAC[C/T]CCAACGCAGGACACTCGGTATCTTTGCGACCCCAG	Y	2	1	2	1	10194	f		218	mosquito (Aedes albopictus)	chr2.82_16451182	chr2.82	16451182	T	C	standard	0.806	recommended
537864243	Affx-1249941456	AX-584425557	ACTCGGACGACTGCATCTTGGTCTACAAAAGAAAC[A/G]AAAACGGCGTAAATATTTGATAACTTTCATCCCAG	R	2	1	2	1	10194	f		218	mosquito (Aedes albopictus)	chr2.107_8172436	chr2.107	8172436	A	G	standard	0.806	recommended
535900847	Affx-1248962616	AX-582471944	CGTGATATCATTGGACTAAATTGGGAGAATTGAAC[G/T]GCGGCCAGCATTGAACCGCAGAAAAACATCAGCAC	K	2	1	2	1	10194	f		218	mosquito (Aedes albopictus)	chr2.17_17946603	chr2.17	17946603	T	G	standard	0.806	recommended
536369861	Affx-1249192864	AX-582936468	TTCCTTTTTCTATGACTAATACTAAGTCTGCGATG[A/G]TTATCGGCCTCCATTTACACATCGCATTAGTATAG	R	2	1	2	1	10194	r		218	mosquito (Aedes albopictus)	chr3.82_3839803	chr3.82	3839803	A	G	standard	0.806	recommended
536107750	Affx-1249062561	AX-582674970	ATTTCATAAATGGGACACTTTATTAACAAAATAAG[A/G]TCAAAAATGATCAATTTAGTGTGTCAGATGTGCTT	R	2	1	2	1	10194	f		218	mosquito (Aedes albopictus)	chr3.75_1563296	chr3.75	1563296	G	A	standard	0.806	recommended
537907642	Affx-1249961898	AX-584468791	AGCTCGTAAAATCGTTTTTCTTCCACGCTGCCTTA[C/T]CGATTCGTTAAGATTAGATTAAATATTAAGACTTC	Y	2	1	2	1	10194	r		218	mosquito (Aedes albopictus)	chr2.122_2224471	chr2.122	2224471	T	C	standard	0.806	recommended
533613311	Affx-1250858960	AX-580231046	ACAGAGAGCAAACTCTCCTTACAAGAGGACGAAAA[A/C]CGTCTCTACCGGTATTCAATGACCCTTAAACAATC	M	2	1	2	1	10194	f		218	mosquito (Aedes albopictus)	chr2.97_2764435	chr2.97	2764435	A	C	standard	0.806	recommended
534774389	Affx-1251281513	AX-581364054	TGCGCCAAATACATTTCATTTGGCACACCCACAAT[A/T]CTCATATTTCAGCGCACAGCATGTACTACACGATG	W	4	1	2	1	10194	f		218	mosquito (Aedes albopictus)	chr3.175_251264	chr3.175	251264	A	T	standard	0.806	recommended
536041826	Affx-1249029135	AX-582609175	GTAAAATAGTAAGAACTTCTAAACATATCCCTGAA[A/T]ATCTGTTTTAGTGGGATGGAAATACAAGTTGTTCT	W	4	1	2	1	10194	r		218	mosquito (Aedes albopictus)	chr2.172_1808240	chr2.172	1808240	A	T	standard	0.806	recommended
537258917	Affx-1249637013	AX-583822553	AATAATCTGAGATCTAGGTTTTTTTGCATTGTTTT[C/T]CTTAAAATAGCTACGTTCGGCTAGCATTTTTTGTT	Y	2	1	2	1	10194	r		218	mosquito (Aedes albopictus)	chr1.59_1611291	chr1.59	1611291	T	C	standard	0.806	recommended
537627890	Affx-1249823321	AX-584189961	CGATACACAACTTATGTCACACAAAAGTAAACCAT[G/T]TCCTTCGCTTGTCTTCTCTTACTATCACACACTAT	K	2	1	2	1	10194	f		218	mosquito (Aedes albopictus)	chr1.90_13147927	chr1.90	13147927	T	G	standard	0.806	recommended
532894059	Affx-1250500375	AX-579512385	CAACCTTATCTCTTAGCCTATTAAACTATTACACT[G/T]ACTGGGTCACACACAGTATTGCCCGGCAAAATAAT	K	2	1	2	1	10194	f		218	mosquito (Aedes albopictus)	chr2.22_13406961	chr2.22	13406961	G	T	standard	0.806	recommended
537542004	Affx-1249778752	AX-584104309	GGCATCGGTAAGTTTTCGTTTTTTACCAATAGGAA[G/T]TGTATTATCTTCTCCGGCCTTGAAAACTTTCACTT	K	2	1	2	1	10194	r		218	mosquito (Aedes albopictus)	chr1.86_147878	chr1.86	147878	G	T	standard	0.806	recommended
537829697	Affx-1249922979	AX-584391111	AAACCACAATGAGATAACTGATAGGTATACTATTG[A/G]GTTCTATTGCGGTTTATCATGGTATTAGGAGCCTG	R	2	1	2	1	10194	r		218	mosquito (Aedes albopictus)	chr2.107_388698	chr2.107	388698	G	A	standard	0.806	recommended
533436235	Affx-1250771612	AX-580054241	TAATTGGTATGAGAGTTTCACACGCAAAATAAAAC[A/G]AAGTGATTAATTTAATGTGGCCTTGGTCAACCGAA	R	2	1	2	1	10194	f		218	mosquito (Aedes albopictus)	chr2.87_8872971	chr2.87	8872971	A	G	standard	0.806	recommended
538084575	Affx-1250128927	AX-584644944	TCCACAGCACGCAAATTTGTGATACTAAGACGAAA[A/C]CTGGCAGGGCTTGCTTGCTAGGGCTAATCCAACTT	M	2	1	2	1	10194	f		218	mosquito (Aedes albopictus)	chr2.163_4840616	chr2.163	4840616	C	A	standard	0.806	recommended
538732952	Affx-1250262294	AX-585286570	GTACGTTCTCAAGAGACCCGTCGTCGTCTGAGAAA[C/T]ATTTCTCGTAGCAAAAGGCGACCCGAAAAAAAAAT	Y	2	1	2	1	10194	r		218	mosquito (Aedes albopictus)	chr2.186_3976387	chr2.186	3976387	C	T	standard	0.806	recommended
536818540	Affx-1249418391	AX-583383744	CCGTAGGAACCTACCCTAGCTAAATGCGTTCAAAT[G/T]CTAATACGATATTTTATTTATAAATTTGTGTACAC	K	2	1	2	1	10194	f		218	mosquito (Aedes albopictus)	chr1.144_5348651	chr1.144	5348651	G	T	standard	0.806	recommended
538598802	Affx-1250128123	AX-585152824	TGATATTTCAATCCCCTCCTCTCCATACAACTCCG[G/T]TTTCAAGTCGACTATGAACCAAAGAAGCTTAGGCT	K	2	1	2	1	10194	r		218	mosquito (Aedes albopictus)	chr2.163_4481364	chr2.163	4481364	G	T	standard	0.806	recommended
538542936	Affx-1250072234	AX-585097255	AGCCCAAAGACATAGTGAGGTGATACAAGTTTGGT[C/T]TTTATCAGCGTCGATGATGTGACTAGAACGTTGAT	Y	2	1	2	1	10194	r		218	mosquito (Aedes albopictus)	chr2.151_8232618	chr2.151	8232618	T	C	standard	0.806	recommended
534912379	Affx-1251330565	AX-581499904	ATCGAAATATCGTTTCAGTATCAACCCACCAAACT[A/G]AAAAGCCAAAAGAAGGGCGATTTCGACAACGATTT	R	2	1	2	1	10194	f		218	mosquito (Aedes albopictus)	chr3.189_259088	chr3.189	259088	G	A	standard	0.806	recommended
538713689	Affx-1250243027	AX-585267369	ACACAAACTTGAAGAATGTTTAATGAAAGGCAATA[C/T]GTATTGTTCTTTGCAGGGAGAAATAATGTGAAAAT	Y	2	1	2	1	10194	r		218	mosquito (Aedes albopictus)	chr2.182_3839420	chr2.182	3839420	T	C	standard	0.806	recommended
537196319	Affx-1249607763	AX-583760191	CACACCATCCAATTTACATTCAGTGATCGAACATG[A/T]TGAACACTGAGATAATCATCACCCTCGCCGAAAGT	W	4	1	2	1	10194	f		218	mosquito (Aedes albopictus)	chr1.50_5101142	chr1.50	5101142	A	T	standard	0.806	recommended
533812843	Affx-1250936559	AX-580427700	CGGTAAGGGAAGATAAGGTTTTCCTGCTAATAAAC[G/T]TATACCAAAAAAACAAACTACTTTGATTCACTTAA	K	2	1	2	1	10194	f		218	mosquito (Aedes albopictus)	chr3.109_5301664	chr3.109	5301664	T	G	standard	0.806	recommended
534042635	Affx-1251033056	AX-580654718	GATGATCTCCACTAAAAACGAATAACTTATAACAT[G/T]TCATCAACAACTGTTGACAATAATAGAGCTACCTA	K	2	1	2	1	10194	f		218	mosquito (Aedes albopictus)	chr3.136_5622410	chr3.136	5622410	T	G	standard	0.806	recommended
537750998	Affx-1249883621	AX-584312586	GAAATACTTCGTGGATTACATACTGGAATTTATCA[A/T]ATTTACCTTGCCATTCTTATTCCAAATACTATTGG	W	4	1	2	1	10194	r		218	mosquito (Aedes albopictus)	chr2.102_1698651	chr2.102	1698651	A	T	standard	0.806	recommended
536112163	Affx-1249064222	AX-582679378	CTCAAATGATGAAAAATGATTGTACTTAGTCAATG[A/G]ACATTCATAATTTCGTTTGGTTTTATTATCCAGTA	R	2	1	2	1	10194	r		218	mosquito (Aedes albopictus)	chr3.75_2025973	chr3.75	2025973	A	G	standard	0.806	recommended
535784981	Affx-1248916145	AX-582358055	GAAGAAGAAGAAAGTATTTTTGTCTTTATCTTTTA[G/T]GTGTGTGATATATCAAATGTCGTGAGAATTATCGA	K	2	1	2	1	10194	r		218	mosquito (Aedes albopictus)	chr3.72_2819614	chr3.72	2819614	T	G	standard	0.806	recommended
538157580	Affx-1250201944	AX-584717764	AGAAAACACTGTAAACAACCAGTATAAACCCAAAA[A/C]GAGTAAAATCAGAGACAGTTGAACAGGAAACCCGT	M	2	1	2	1	10194	f		218	mosquito (Aedes albopictus)	chr2.175_8217923	chr2.175	8217923	A	C	standard	0.806	recommended
537954524	Affx-1249998827	AX-584515519	GAAACTTTAGGACGAATATTTGAATAGTGGAATTA[A/T]TAATTCAATTATTGCATTGCACACCACGTGGTTTC	W	4	1	2	1	10194	f		218	mosquito (Aedes albopictus)	chr2.125_7501013	chr2.125	7501013	A	T	standard	0.806	recommended
534469281	Affx-1251186619	AX-581069901	AATTTCTTTTGAACACTTTCTAAATTTTTGGTTTG[C/G]TTTTAGGTAACCCATTGGAGTGTAACTGCGAGATA	S	4	1	2	1	10194	r		218	mosquito (Aedes albopictus)	chr3.166_2757407	chr3.166	2757407	G	C	standard	0.806	recommended
537233078	Affx-1249624095	AX-583796837	CCTTTCAGCAACGAGAAAAAAAAAATCCATCTCTC[A/G]ATTGCAAATTACTTGCAAAAATCCGATTTCCAGAC	R	2	1	2	1	10194	r		218	mosquito (Aedes albopictus)	chr1.50_13297132	chr1.50	13297132	A	G	standard	0.806	recommended
535826455	Affx-1248933324	AX-582398875	AAATAAAATAATTACCGTAAACTTAATAAGATTAA[A/C]ATGCTTAACGGTCATGTGGCAATACAAGAGATTTT	M	2	1	2	1	10194	r		218	mosquito (Aedes albopictus)	chr3.74_2709583	chr3.74	2709583	A	C	standard	0.806	recommended
538725823	Affx-1250255163	AX-585279458	AAACGATCACGAACTTCCAACCGTTCAACTAAGCT[C/T]GATCTGATCCTACAAGGTATGCCTTTGTGTGGTTT	Y	2	1	2	1	10194	r		218	mosquito (Aedes albopictus)	chr2.186_1868193	chr2.186	1868193	C	T	standard	0.806	recommended
537643699	Affx-1249829791	AX-584205722	TCTGTTGCATAGCCGAAGGTTTCTGTTGAAAATAG[G/T]TAAAATCATGTATTGTGAAGCATAACACGCGTTAA	K	2	1	2	1	10194	r		218	mosquito (Aedes albopictus)	chr1.90_15944538	chr1.90	15944538	T	G	standard	0.806	recommended
532844719	Affx-1250475663	AX-579463053	TGTGTTTTATTCGGATGAATGCCAAAGAGCATCAG[C/G]CAGAATCCGAAACAGTGTTTCTTTTCTATTATTCA	S	4	1	2	1	10194	f		218	mosquito (Aedes albopictus)	chr2.22_4063455	chr2.22	4063455	G	C	standard	0.806	recommended
536676716	Affx-1249347371	AX-583242263	ACAAAAGACTTCTGTATGATGCTGAAGACCAGAAC[A/C]AGACAAAATGAAAAAATCACGAAAACTGGTCAAAC	M	2	1	2	1	10194	f		218	mosquito (Aedes albopictus)	chr1.131_2195968	chr1.131	2195968	C	A	standard	0.806	recommended
537013171	Affx-1249515995	AX-583577855	ACTTGTTATCGATAACATTGGGATTAACGATGAAA[A/G]CCAGAAAGGAGCTAATATTGACCAATCATTACATT	R	2	1	2	1	10194	f		218	mosquito (Aedes albopictus)	chr1.170_2849382	chr1.170	2849382	G	A	standard	0.806	recommended
538138363	Affx-1250182727	AX-584698609	TCCTGATCATGACCATAATTCTGATAAAGTGCAGA[A/G]CCAACAACTCTCACAAAAACCATCCGGACAAAGAT	R	2	1	2	1	10194	f		218	mosquito (Aedes albopictus)	chr2.175_1078758	chr2.175	1078758	G	A	standard	0.806	recommended
536911083	Affx-1249463432	AX-583476047	AACAGTCTGTCGATAGCAAATACCTAGGCGATGAG[C/G]TGAGTTTAGATGTGATCTTGATAGAAATCTACATA	S	4	1	2	1	10194	r		218	mosquito (Aedes albopictus)	chr1.149_3448420	chr1.149	3448420	C	G	standard	0.806	recommended
537375556	Affx-1249695443	AX-583938599	AGCTTGCTTCCCTTCTCGTCATTCTTCTCCTTCTC[A/T]ATCTTTGTACTGCTTCGAGATCGTTTGTTGCGCTT	W	4	1	2	1	10194	r		218	mosquito (Aedes albopictus)	chr1.7_16121209	chr1.7	16121209	T	A	standard	0.806	recommended
536606814	Affx-1249312452	AX-583172633	TTTGTGTAGTACAAGTCGTGAACAATGAATTTCAA[A/T]GATAACCATCTGAGTTATTTTTGTGACGCAGATGC	W	4	1	2	1	10194	f		218	mosquito (Aedes albopictus)	chr1.116_3548807	chr1.116	3548807	T	A	standard	0.806	recommended
537775735	Affx-1249895932	AX-584337272	CTGCTTTCTGTTGTTTTCTCAAAAGATGTGGATAT[C/T]TTTTCTGTTACACGTTCTTCTTGGTGATGCGTCGT	Y	2	1	2	1	10194	r		218	mosquito (Aedes albopictus)	chr2.103_3409167	chr2.103	3409167	T	C	standard	0.806	recommended
536365896	Affx-1249191938	AX-582932511	CTATAAGTTGCATAATCTGAATATTGCTAAATAGT[C/T]ACATGGGACAGCCGTGCTGCTACCGGCAGCATTTA	Y	2	1	2	1	10194	f		218	mosquito (Aedes albopictus)	chr3.82_3585941	chr3.82	3585941	C	T	standard	0.806	recommended
533883622	Affx-1250962379	AX-580498389	AGCGATTCTGTTGGAGAGTTATGCATTCAAAAGAT[C/T]TCCAGTAATGGTGTTATGCATTCGCAAGTGGCAAA	Y	2	1	2	1	10194	f		218	mosquito (Aedes albopictus)	chr3.116_4651643	chr3.116	4651643	T	C	standard	0.806	recommended
538586868	Affx-1250116186	AX-585140974	CAAAGTTTGCCCCGATTGACAGCCTCACTAAATCA[A/T]TCCATTCCATTAATCATCAGCTTTCCCAATCGGCT	W	4	1	2	1	10194	r		218	mosquito (Aedes albopictus)	chr2.155_19954921	chr2.155	19954921	A	T	standard	0.806	recommended
535778986	Affx-1248913920	AX-582352156	CGAAATTTGGTTCGGTAACTCATTCGGAAATTTCT[G/T]GACTATAATATTAGAGATAGATGTAGGTTTTTATT	K	2	1	2	1	10194	r		218	mosquito (Aedes albopictus)	chr3.72_2202893	chr3.72	2202893	G	T	standard	0.806	recommended
537519705	Affx-1249769438	AX-584082077	GACCAATACGAACTGTGCTTGACAAAGTGCAGAAC[A/C]AACTCACATTCAGTGCAGAACGAGAACAAATATCG	M	2	1	2	1	10194	f		218	mosquito (Aedes albopictus)	chr1.85_24609619	chr1.85	24609619	C	A	standard	0.806	recommended
535888614	Affx-1248957823	AX-582459958	GGTGAAAATTTTTGACACTTAGTTAGACTTGAACT[A/G]AAATTGAACCGACTACTCTGATGAGCTCTGATGCT	R	2	1	2	1	10194	f		218	mosquito (Aedes albopictus)	chr2.17_16471375	chr2.17	16471375	G	A	standard	0.806	recommended
533341019	Affx-1250722712	AX-579959093	TCCACAAGTTTCATCTGCTTATGGGCTATACACGT[A/G]TAGTGTCTATGGATTCTATAAAGATAAAAAAATAT	R	2	1	2	1	10194	r		218	mosquito (Aedes albopictus)	chr2.82_14016311	chr2.82	14016311	G	A	standard	0.806	recommended
534504200	Affx-1251197148	AX-581102957	GTTTTCCAGAAAGTATCCTTGCGGAAAATCTAAAG[A/G]AAATCCCTGAAGTAATGCTTGCTATTTTTTTTAAG	R	2	1	2	1	10194	f		218	mosquito (Aedes albopictus)	chr3.166_6578583	chr3.166	6578583	G	A	standard	0.806	recommended
535957508	Affx-1248987240	AX-582525034	AAGAGGTAAAGACTGAACTCACCAAACCAGTCGAA[A/G]CACCGAAACCCAAAGTTGACAAAAAAGATCGTCCC	R	2	1	2	1	10194	f		218	mosquito (Aedes albopictus)	chr2.17_29085670	chr2.17	29085670	A	G	standard	0.806	recommended
535644472	Affx-1248867322	AX-582222819	AAATGTTTCACTGGAAGTACCTTAAAGGACAAGAT[C/T]TTATGATTCTTTTAAATCTTCATAGGATTCCACAA	Y	2	1	2	1	10194	f		218	mosquito (Aedes albopictus)	chr3.69_7372794	chr3.69	7372794	T	C	standard	0.806	recommended
537584081	Affx-1249801610	AX-584146269	ACGGATGAGCCGCCTTAATACAAACGCACAATGGA[A/T]TGATCCCATTCGAACGTTACTTCCCTTCAGCGTTC	W	4	1	2	1	10194	f		218	mosquito (Aedes albopictus)	chr1.90_6009502	chr1.90	6009502	A	T	standard	0.806	recommended
538723053	Affx-1250252393	AX-585276696	CGTCGTCGCCGTCGTCCTCGTCGTGTTGTAATAAA[A/T]CTTTAATGGTGTCTCTCTCCTTCTCTATTTGTAAA	W	4	1	2	1	10194	r		218	mosquito (Aedes albopictus)	chr2.186_639526	chr2.186	639526	A	T	standard	0.806	recommended
535689616	Affx-1248883228	AX-582267228	AAGCAGGGCGCGTGCGGTAGGTTCTTCGTCCCCTA[A/G]TATGCCTAAGTATTCATGACTACATACCATATTGA	R	2	1	2	1	10194	r		218	mosquito (Aedes albopictus)	chr3.7_4024168	chr3.7	4024168	G	A	standard	0.806	recommended
537705741	Affx-1249862070	AX-584267550	GGTACCAGCGAACGGACTGAAAAGTTCACATGCAA[A/G]CTATGTCTGCAAGAGTTCAGTAAGCAAACGGAACT	R	2	1	2	1	10194	f		218	mosquito (Aedes albopictus)	chr1.92_584310	chr1.92	584310	A	G	standard	0.806	recommended
535700905	Affx-1248886769	AX-582278390	CAATATTCGTGAAATCGGTATTCGAATAAAAGTAG[C/T]ACAACCGCCTGTGTGACTATGTGAGGATACCCACA	Y	2	1	2	1	10194	f		218	mosquito (Aedes albopictus)	chr3.7_5744519	chr3.7	5744519	T	C	standard	0.806	recommended
534227428	Affx-1251099799	AX-580832644	AAATGGATTGACAGCCGTATCCACTAAACAAATCG[A/G]ATTGGATCCTACATCTCAATCCCGAAATCAAGATC	R	2	1	2	1	10194	f		218	mosquito (Aedes albopictus)	chr3.151_2401490	chr3.151	2401490	A	G	standard	0.806	recommended
533767318	Affx-1250917827	AX-580382676	GGGTTGACGACGAATTCGAAGTGTGCTGGTTAAAT[C/T]TCTCTCACTTATTACACGTGACTGTGAATAACAAC	Y	2	1	2	1	10194	r		218	mosquito (Aedes albopictus)	chr3.1_11282796	chr3.1	11282796	C	T	standard	0.806	recommended
537914245	Affx-1249966456	AX-584475367	TCAGTGTAAGACTTTGAAATAAGTATACGCCTATC[A/T]TAGAACTATCGTCATCAAATCCTGCTATTAAGATG	W	4	1	2	1	10194	f		218	mosquito (Aedes albopictus)	chr2.122_4118490	chr2.122	4118490	T	A	standard	0.806	recommended
533287756	Affx-1250696113	AX-579905881	ATGTCATTGGCAGAGGTTTCCAAGTTTGATATCTA[C/T]AGTTTATGGATAGATAACTCCCAAGTAACAGAACT	Y	2	1	2	1	10194	r		218	mosquito (Aedes albopictus)	chr2.72_854304	chr2.72	854304	T	C	standard	0.806	recommended
538094211	Affx-1250138566	AX-584654541	AGAAGTCGTACACCAATAAGATCGGTTTGACAGAG[A/T]ATAATACGTGTTTAAGGTTTCTTCATCGAGAAGTT	W	4	1	2	1	10194	f		218	mosquito (Aedes albopictus)	chr2.166_72039	chr2.166	72039	A	T	standard	0.806	recommended
533328335	Affx-1250717718	AX-579946420	CAAGGAATATTGGATATCTTAAAGTTTCGGAATAC[C/T]AATACGTTTGGCCAATTATGATCACTAATTAACTC	Y	2	1	2	1	10194	f		218	mosquito (Aedes albopictus)	chr2.82_11522229	chr2.82	11522229	C	T	standard	0.806	recommended
536149056	Affx-1249083222	AX-582716203	TTACTTTCTTTAAATGAAATGGCCAACAATGAGCA[A/C]ACCTGAAGTGCCCAGTCTAAGCGAAAATTTGTATC	M	2	1	2	1	10194	f		218	mosquito (Aedes albopictus)	chr3.75_8080784	chr3.75	8080784	A	C	standard	0.806	recommended
534760177	Affx-1251277908	AX-581350017	TTGTCGGCGCCACTGGCACTACTGTCAGGTGATGA[A/T]ATGATTTGTGTGTTTCAAATGAGGTGCTAAGATAG	W	4	1	2	1	10194	r		218	mosquito (Aedes albopictus)	chr3.170_20257503	chr3.170	20257503	T	A	standard	0.806	recommended
536335636	Affx-1249176772	AX-582902380	TGCATGTCATATAAAATGTCAATTTGTAATACGAT[A/T]GAGAATGTAATTTTATGAATTAATTTTACAGAAAA	W	4	1	2	1	10194	f		218	mosquito (Aedes albopictus)	chr3.78_2189016	chr3.78	2189016	T	A	standard	0.806	recommended
536367233	Affx-1249191535	AX-582933848	CACGCTAGAAGTAATACGCAAAAGTAATTTACCCG[C/T]TCATTTTGTATCCAACAATATCAAACGCATTATTT	Y	2	1	2	1	10194	r		218	mosquito (Aedes albopictus)	chr3.82_3501085	chr3.82	3501085	C	T	standard	0.806	recommended
533669303	Affx-1250878829	AX-580286310	CCACACTAAAACACCTCTTTAACTATTCTGAGACT[C/T]TCTTTTCAGAAACCCTGAAATCTCCGAGCACTCTC	Y	2	1	2	1	10194	f		218	mosquito (Aedes albopictus)	chr2.97_11558632	chr2.97	11558632	T	C	standard	0.806	recommended
537872043	Affx-1249945377	AX-584433305	ACCATCGTATCTATCGGAAGGCACAATATTATGAA[C/G]CACTATACTGATTTTCGGATTTTGTGCATCAGTAA	S	4	1	2	1	10194	f		218	mosquito (Aedes albopictus)	chr2.118_1610924	chr2.118	1610924	C	G	standard	0.806	recommended
536325073	Affx-1249171471	AX-582891860	TTAGCGTAATTAAACGTTGAAAAGAGCGGAAACAT[A/G]TAAGTAAACCCTTAGTTTGATGTAATATGAATGGT	R	2	1	2	1	10194	f		218	mosquito (Aedes albopictus)	chr3.78_11605	chr3.78	11605	G	A	standard	0.806	recommended
536194106	Affx-1249105271	AX-582761153	CGAGTATTTCCGAACAACTTCTATGTTGAACATTT[C/T]TATAAGCCACAATTGTTTTGCGTCAGTTCTGACAA	Y	2	1	2	1	10194	r		218	mosquito (Aedes albopictus)	chr3.75_16543468	chr3.75	16543468	T	C	standard	0.806	recommended
537668084	Affx-1249841990	AX-584230007	ATATTTGCTCTCGTATCTTTCACTTTCGCTGTGAC[A/T]TATACAACGTGTATTTCGTGATCAAAACCAGTTTT	W	4	1	2	1	10194	r		218	mosquito (Aedes albopictus)	chr1.91_1947819	chr1.91	1947819	T	A	standard	0.806	recommended
536428721	Affx-1249223357	AX-582995146	TTCGGCATGTAGTACCACTGCAGAGACGATGAATA[A/C]AGTCCGTTGACACCATTCTGCCGCGTTTGAACACC	M	2	1	2	1	10194	f		218	mosquito (Aedes albopictus)	chr3.93_4314308	chr3.93	4314308	C	A	standard	0.806	recommended
536962871	Affx-1249489314	AX-583527695	GGGTCTTAACTCTTCGGCTGATAACAGTCGTACCA[A/G]TTCTAATGATGATTGATTATTGAGAAACATTCGAA	R	2	1	2	1	10194	r		218	mosquito (Aedes albopictus)	chr1.152_5449431	chr1.152	5449431	A	G	standard	0.806	recommended
534020132	Affx-1251021300	AX-580632238	AGCAGGATGGATTTGTAATCCTGTGGGTGTGGGAT[A/G]GTAGTTAGAATTTGTCGAGTTTGTTATAAGACAGT	R	2	1	2	1	10194	r		218	mosquito (Aedes albopictus)	chr3.136_1159979	chr3.136	1159979	G	A	standard	0.806	recommended
538149782	Affx-1250194146	AX-584709994	GTATGAAGTGTCTAAATATCTGTTTAGGAGAAAAG[C/G]CAGTAAAATTAAAACATTTGGATGAGATATTCTCC	S	4	1	2	1	10194	f		218	mosquito (Aedes albopictus)	chr2.175_4818047	chr2.175	4818047	C	G	standard	0.806	recommended
536137263	Affx-1249077302	AX-582704422	AATCGCTTCTTTATTTAGTGCAAAATTGTGTCAAG[A/T]TCCACCCTGCACGATGTTCATTTTCCCAATCAGCT	W	4	1	2	1	10194	f		218	mosquito (Aedes albopictus)	chr3.75_6201577	chr3.75	6201577	T	A	standard	0.806	recommended
537591831	Affx-1249803706	AX-584153999	CCGTGTTTTTATTATTTCGCCATTAGGGTGACCAA[C/T]TTTATGTTGGTGGTCATGAAAATCAAGATTTTTCA	Y	2	1	2	1	10194	r		218	mosquito (Aedes albopictus)	chr1.90_6633160	chr1.90	6633160	T	C	standard	0.806	recommended
535231037	Affx-1251453938	AX-581815734	CACGCAAAATCGCATGACGATAGCACATATGTAAT[C/T]TCTAAAACGTGCAAAATGTCTAACAGATAAAACTG	Y	2	1	2	1	10194	f		218	mosquito (Aedes albopictus)	chr3.40_3113920	chr3.40	3113920	T	C	standard	0.806	recommended
533927709	Affx-1250979575	AX-580540123	GCAAGGCAGTCAACCTTTCTTGAAGTAAAGCAAAT[C/T]CCACTTCCGAAGGATTTCCTCGGCCTAAAAATTCG	Y	2	1	2	1	10194	f		218	mosquito (Aedes albopictus)	chr3.119_2983316	chr3.119	2983316	C	T	standard	0.806	recommended
533450209	Affx-1250778596	AX-580068199	GAAAAGAAATCTGAATATTAGTTGTCATGTAATCA[A/C]AAAATCGTCGTAAATATTTGTCACGTAAATTGAAT	M	2	1	2	1	10194	f		218	mosquito (Aedes albopictus)	chr2.87_12154067	chr2.87	12154067	A	C	standard	0.806	recommended
537277131	Affx-1249648273	AX-583840610	TTTAACACAATAAATCTGTTTCCCATCGCAAAATA[C/G]ACTGACGTCAATCGATTCCTACCCTATACTCGGTC	S	4	1	2	1	10194	f		218	mosquito (Aedes albopictus)	chr1.67_2709625	chr1.67	2709625	G	C	standard	0.806	recommended
536307958	Affx-1249162055	AX-582874782	ACCCATTCTTTTTTTTTTTCTCTCTCTCACCCATT[A/C]TTTGGTCGTCTTTAATCGGTGCCTATCACCTCCCG	M	2	1	2	1	10194	r		218	mosquito (Aedes albopictus)	chr3.77_16095393	chr3.77	16095393	C	A	standard	0.806	recommended
535167579	Affx-1251430614	AX-581752965	AGCTCAATGTGGTTCAGCATAGGGTGGTTTTGTGA[A/C]TATTTCAGTATCTGATAATATGTACCTAACATCAT	M	2	1	2	1	10194	r		218	mosquito (Aedes albopictus)	chr3.32_1388808	chr3.32	1388808	C	A	standard	0.806	recommended
537722088	Affx-1249870302	AX-584283838	TTGTTGTCCAGATCATACAGATTCGGCGAAAAGTA[A/C]ACACTAAGGTCCGGATTTTTGGATTCGTCCTGTAG	M	2	1	2	1	10194	f		218	mosquito (Aedes albopictus)	chr1.96_944254	chr1.96	944254	A	C	standard	0.806	recommended
537875873	Affx-1249945986	AX-584437129	AGAACCGCGCAGGAGTTGAACGGCAACGATGCAGT[A/T]GCGTTGAAATTACTCAATCCAATACGAACAAGTCT	W	4	1	2	1	10194	r		218	mosquito (Aedes albopictus)	chr2.118_1855062	chr2.118	1855062	T	A	standard	0.806	recommended
536789284	Affx-1249403681	AX-583354555	CCAAAAGCTAACACAAAATTCAGTACCAATATCAC[C/T]TCGACTAATAGATGGGAAAAAGAAATAAATCTTTC	Y	2	1	2	1	10194	f		218	mosquito (Aedes albopictus)	chr1.142_178660	chr1.142	178660	C	T	standard	0.806	recommended
538551725	Affx-1250081028	AX-585106014	ATTCGTATCGTCTCTTGCTTCACCTTCACCAGCAG[A/G]TTCTTCCAAATTGAATAACAGTTCCTCGTTTTCGG	R	2	1	2	1	10194	r		218	mosquito (Aedes albopictus)	chr2.151_11974178	chr2.151	11974178	G	A	standard	0.806	recommended
538701632	Affx-1250230969	AX-585255357	TGACCATCAAATGGAGCGTGGGTCGCGCTCATTAT[C/T]TCCATAATTTTTAAACTATAGCAATCATCCGCAAC	Y	2	1	2	1	10194	r		218	mosquito (Aedes albopictus)	chr2.179_2739142	chr2.179	2739142	C	T	standard	0.806	recommended
537462137	Affx-1249738688	AX-584024662	CTATCCGAGGAACCCGTCATTCAAAAGTCGGAAAT[C/T]TATCTCGAAATTGACAGCAACTCTACGGTGGTTGA	Y	2	1	2	1	10194	r		218	mosquito (Aedes albopictus)	chr1.85_13028635	chr1.85	13028635	T	C	standard	0.806	recommended
538083124	Affx-1250127475	AX-584643493	AACACTTTTGAGGTAGTATAAACACTACAGAAGGT[A/G]TACAGAATTACCAAACACAATTTCGCCCCAAAAAT	R	2	1	2	1	10194	f		218	mosquito (Aedes albopictus)	chr2.163_4168533	chr2.163	4168533	A	G	standard	0.806	recommended
537910348	Affx-1249963292	AX-584471480	TAGCTGCTGGGACCCTTTGTAAAAATCGATGATCA[A/T]TAAATATAATTCAACAGCCAATAGCCAAAAGAGGG	W	4	1	2	1	10194	r		218	mosquito (Aedes albopictus)	chr2.122_3340153	chr2.122	3340153	A	T	standard	0.806	recommended
533539807	Affx-1250822186	AX-580157725	TCCTGTTTTCAGTGTTTTCTGCTATGTGTCGTTAG[C/T]TCATTTCGATCATGCCTGACGATAGAAAAATCGAT	Y	2	1	2	1	10194	r		218	mosquito (Aedes albopictus)	chr2.87_30016006	chr2.87	30016006	C	T	standard	0.806	recommended
534651764	Affx-1251239303	AX-581245826	TAAAAACAATAGCTTAGAGAATAGGTAAACTAACA[A/G]TAAAATTTACTCACGATTCATCAGCATCTCGGTGT	R	2	1	2	1	10194	f		218	mosquito (Aedes albopictus)	chr3.170_3629463	chr3.170	3629463	G	A	standard	0.806	recommended
537802632	Affx-1249910595	AX-584364127	TGGAGATTGCATCATCGTCGTTGGGTAAAAGTACA[C/T]AAAGTGCATTCGAATGATTAAGCATTCTTGATGAT	Y	2	1	2	1	10194	f		218	mosquito (Aedes albopictus)	chr2.103_7624494	chr2.103	7624494	C	T	standard	0.806	recommended
533396403	Affx-1250751792	AX-580014446	TCTGAAAATGCATTAGACCGTGAAATTCAATTCCA[A/T]CTACGTGAGATTGATCAAGTCTGTGAAATTCATGC	W	4	1	2	1	10194	f		218	mosquito (Aedes albopictus)	chr2.87_933260	chr2.87	933260	A	T	standard	0.806	recommended
533623389	Affx-1250861568	AX-580241002	TTGTTCTTGAGACAGACCAATAGTTAATTTTATTT[C/T]GCTGTGCTTTCCAATAGTAGGATATGCCTTTGAAA	Y	2	1	2	1	10194	r		218	mosquito (Aedes albopictus)	chr2.97_3591405	chr2.97	3591405	C	T	standard	0.806	recommended
533617560	Affx-1250860569	AX-580235238	CCTAGATGATTCTGCTTCACCTTAATTTCAAACCT[C/G]AATAGCTTTTACAGAATGCATTTTGAAATTTATTT	S	4	1	2	1	10194	f		218	mosquito (Aedes albopictus)	chr2.97_3224162	chr2.97	3224162	C	G	standard	0.806	recommended
536840496	Affx-1249428251	AX-583405605	AACATTTGGCTTCCAAAAAAAAAAGAAAACAGTTG[C/T]CATTCTTTCCCTTTTAGAAAAAGCGCTTTTGGCGC	Y	2	1	2	1	10194	r		218	mosquito (Aedes albopictus)	chr1.147_284539	chr1.147	284539	C	T	standard	0.806	recommended
533572642	Affx-1250838599	AX-580190520	TGGAGATCATAACAGACGACGGAATGGAAAATCGA[C/T]TATTTCTGATTAATGTACGACACTTCTTAGGACCT	Y	2	1	2	1	10194	r		218	mosquito (Aedes albopictus)	chr2.94_161679	chr2.94	161679	C	T	standard	0.806	recommended
534068666	Affx-1251045509	AX-580680556	CAGAAATCGTATTTATGAACAATAACGAATTGAAA[A/G]TCAGGGTAATGCTTTTGGCGACCTTCAACTGTCGA	R	2	1	2	1	10194	f		218	mosquito (Aedes albopictus)	chr3.139_537282	chr3.139	537282	G	A	standard	0.806	recommended
538164450	Affx-1250208814	AX-584724618	ATGCATTTAACCAACTACAGTATTAACAAACTGTC[A/C]AACAACTACAACGCCAATGAAGACGCCGACGCCTG	M	2	1	2	1	10194	f		218	mosquito (Aedes albopictus)	chr2.176_366183	chr2.176	366183	C	A	standard	0.806	recommended
534896441	Affx-1251324264	AX-581484093	TAAAAATTTGTGTAAAAGTCATAACTGTGCATTTC[A/T]TACAACTTGATAAAACTGATAAATTACCATTCCGC	W	4	1	2	1	10194	f		218	mosquito (Aedes albopictus)	chr3.180_10301395	chr3.180	10301395	T	A	standard	0.806	recommended
534845691	Affx-1251305250	AX-581434286	TTAAAATTTGCTTTCAAACCTAAAGTTTGACTAGA[A/C]TAGAATTTGAAACTAACGATTACTTTATCTGGTAA	M	2	1	2	1	10194	f		218	mosquito (Aedes albopictus)	chr3.180_3205017	chr3.180	3205017	C	A	standard	0.806	recommended
534075496	Affx-1251048779	AX-580687353	TACACCAACATTCTCCGAAAGCTGGATGGCGAAAT[A/C]ATGGATGGGATCCTGAAAATGGACGACGAAGATGA	M	2	1	2	1	10194	f		218	mosquito (Aedes albopictus)	chr3.139_2511871	chr3.139	2511871	C	A	standard	0.806	recommended
533813062	Affx-1250936638	AX-580427919	CATGTCATCAAATTTAAGTCAACACTTTCCAAGTA[A/G]GAAATGACTAATTGAAAATCGATTATCCCAACTCC	R	2	1	2	1	10194	f		218	mosquito (Aedes albopictus)	chr3.109_5327687	chr3.109	5327687	G	A	standard	0.806	recommended
534333334	Affx-1251143913	AX-580935790	TTACGTTGATTTTGATTAAAACTAGTTACAATGCA[A/G]ATAGTTACAATTCAGTTCTCAACTTGCAGATAAAA	R	2	1	2	1	10194	f		218	mosquito (Aedes albopictus)	chr3.16_4887893	chr3.16	4887893	A	G	standard	0.806	recommended
533067308	Affx-1250586233	AX-579685571	ACCCACCTTGTGCGGTAGCAGAAGGGTGTTTATAC[C/G]TTGCATACCTACATTAAGACCCGGTGAAGTCAAGT	S	4	1	2	1	10194	r		218	mosquito (Aedes albopictus)	chr2.42_14754078	chr2.42	14754078	C	G	standard	0.806	recommended
536448341	Affx-1249233062	AX-583014700	ACCTGTTCTCTTTAGGGCAGCAAATCAAGTATAAG[A/T]ACATTTCCAACATGCTTAAGTTACTGGTCCAATCA	W	4	1	2	1	10194	f		218	mosquito (Aedes albopictus)	chr3.95_2953657	chr3.95	2953657	A	T	standard	0.806	recommended
533994910	Affx-1251009412	AX-580607093	CTAGACGGTAGTAGAAATACTGGCAGCAATAGCAT[A/T]GTAGAAGTACCACGGAAATCTCCCCCTATTTTAGG	W	4	1	2	1	10194	f		218	mosquito (Aedes albopictus)	chr3.125_705010	chr3.125	705010	T	A	standard	0.806	recommended
534120636	Affx-1251070766	AX-580732199	GGCTGGCACCGAACCTGATCACCATCGTGGGCCTG[A/G]TTATCAACATTGTGACGACGCTTATCCTTATCTAG	R	2	1	2	1	10194	r		218	mosquito (Aedes albopictus)	chr3.145_3146050	chr3.145	3146050	A	G	standard	0.806	recommended
533445500	Affx-1250774972	AX-580063496	AGAAGAATCGATTTTCGCAGAAAATAATCGAATGT[C/T]TGTTCAACACGGTTACCGATAAGCGGATTTCGATT	Y	2	1	2	1	10194	r		218	mosquito (Aedes albopictus)	chr2.87_9828103	chr2.87	9828103	T	C	standard	0.806	recommended
534997321	Affx-1251364516	AX-581584310	TAATGTGTGCCATTTGCACATATACGTCAGCCAAA[A/G]CCCAAAACCTGCTACTGCAGGGTCTCTCCAAAAAT	R	2	1	2	1	10194	f		218	mosquito (Aedes albopictus)	chr3.20_6815882	chr3.20	6815882	A	G	standard	0.806	recommended
538379476	Affx-1250423879	AX-584939072	CAGAAATTTACCTACATTTCATACAATCATTCACA[A/C]CAGTTTATTTACCCATCTTTGCCTTCTTATTGGCC	M	2	1	2	1	10194	f		218	mosquito (Aedes albopictus)	chr2.198_3949299	chr2.198	3949299	A	C	standard	0.806	recommended
536784178	Affx-1249401099	AX-583349455	AACCAATCGAATTGTTGCTTGGTATGTTTTTCAAA[A/C]ACTCTTTCTGTTTGGAAGAATATAATTTTATGATT	M	2	1	2	1	10194	f		218	mosquito (Aedes albopictus)	chr1.14_717571	chr1.14	717571	A	C	standard	0.806	recommended
533337386	Affx-1250722251	AX-579955465	GATCACCGAAATTTACACATTTTGCGATGAATAAA[A/G]CGCCACACAAACACTCGATGCTCGTCGTACGTAGC	R	2	1	2	1	10194	f		218	mosquito (Aedes albopictus)	chr2.82_13904919	chr2.82	13904919	A	G	standard	0.806	recommended
536438097	Affx-1249227113	AX-583004504	AAAGTCACAGCTTAATTGTCATTAAACACTTCCTC[C/T]TGTTCCCTTAATACAGATCTGTCAAATTTAGCTCA	Y	2	1	2	1	10194	r		218	mosquito (Aedes albopictus)	chr3.93_5939265	chr3.93	5939265	T	C	standard	0.806	recommended
535876711	Affx-1248953133	AX-582448275	ATTAAGTTTGGTGTAAAAGTAACTTACATTGAACT[A/G]TCCGGAGTCAACTTCCCGCTCCCCAGCGTGGCTTC	R	2	1	2	1	10194	f		218	mosquito (Aedes albopictus)	chr2.17_14739245	chr2.17	14739245	G	A	standard	0.806	recommended
536324460	Affx-1249170215	AX-582891250	AGAAACATTTGCATTCTAAACGGTTTCTTGCGTTG[A/G]TTTTATTTTATTCAGGATTAGTGGCATTTTCACTG	R	2	1	2	1	10194	r		218	mosquito (Aedes albopictus)	chr3.77_20015034	chr3.77	20015034	G	A	standard	0.806	recommended
538105385	Affx-1250149740	AX-584665698	TGATGATATTGATCAGCTTGGAAATATGAGACGAT[A/G]GAATTATTTCCATGTGGGTGAAAAAATCGATCAAA	R	2	1	2	1	10194	f		218	mosquito (Aedes albopictus)	chr2.167_3641200	chr2.167	3641200	G	A	standard	0.806	recommended
538097039	Affx-1250141394	AX-584657364	CAGTTTCGGGAGAACATGAAGTTAAAATCAATGAA[C/T]TTGTAGTCCGGTGGAGTCTGTCCCACCCACATGGG	Y	2	1	2	1	10194	f		218	mosquito (Aedes albopictus)	chr2.167_1021689	chr2.167	1021689	T	C	standard	0.806	recommended
533283479	Affx-1250695276	AX-579901612	TGTATTTTGTCAAGACCGAGCCAGAATTCACCATA[C/T]AAATTCCCAAAGCCGTTTTTGTATTCTTTCCAACC	Y	2	1	2	1	10194	f		218	mosquito (Aedes albopictus)	chr2.71_744991	chr2.71	744991	C	T	standard	0.806	recommended
533069864	Affx-1250587493	AX-579688124	AAGGGTATACACTTCAAGTGAGTTTCGAGGGAGAA[G/T]GTTTGATTTGTAATAATGAACATCGGAGTTCTAAT	K	2	1	2	1	10194	r		218	mosquito (Aedes albopictus)	chr2.48_360270	chr2.48	360270	G	T	standard	0.806	recommended
533467374	Affx-1250785861	AX-580085350	AGTCGATCGAATTGGTTGGTGAGAATGCGAATTGT[G/T]AGTTTATTTGAATTGTGGTTTGTGATTAATTTGAA	K	2	1	2	1	10194	r		218	mosquito (Aedes albopictus)	chr2.87_14265595	chr2.87	14265595	T	G	standard	0.806	recommended
533600614	Affx-1250853548	AX-580218431	TGACTGGGAAAAGTCTGTTAAATTTGAGTCAATCA[A/G]ACATGAACTATCACATTATTGTGCTTTAGGTTCAC	R	2	1	2	1	10194	f		218	mosquito (Aedes albopictus)	chr2.97_1262783	chr2.97	1262783	G	A	standard	0.806	recommended
534850272	Affx-1251307785	AX-581438794	TCGGGGTGAGACGCTCCCATTATGATTCGATGTGG[C/T]GTTCAGTGTTTCAGTTATATTAGTTAAATTTGTAC	Y	2	1	2	1	10194	r		218	mosquito (Aedes albopictus)	chr3.180_3996681	chr3.180	3996681	T	C	standard	0.806	recommended
533895804	Affx-1250967458	AX-580510299	ATCCCTGGAAAAGAAGATTAGAAGCATTTCTGAAA[C/T]TTCTGAATGAACCACTGAATAATTTTTGAAAGAGA	Y	2	1	2	1	10194	f		218	mosquito (Aedes albopictus)	chr3.116_7000827	chr3.116	7000827	C	T	standard	0.806	recommended
536416575	Affx-1249217282	AX-582983010	CGACGAAAGAAAACTATGTCAACAAGCGACACAAT[A/G]ATGGTGGGCTGGACTGGCTGCCGGGCGGGGAGTGA	R	2	1	2	1	10194	f		218	mosquito (Aedes albopictus)	chr3.93_2533852	chr3.93	2533852	A	G	standard	0.806	recommended
537547076	Affx-1249781285	AX-584109344	TCTATAGTACTAGCCAGCAGGGATGGCATGCTCTT[C/T]CGTGTATTTGTAAGAGTTAACGGTTGTAATATGAA	Y	2	1	2	1	10194	r		218	mosquito (Aedes albopictus)	chr1.90_318408	chr1.90	318408	T	C	standard	0.806	recommended
533977298	Affx-1250999809	AX-580589507	GTCTGGCTCTTAGCACATGTGTAGAGTTTTAACTC[A/G]TATTTATAATGAATCAAAATCTAAGAACCGGTGGA	R	2	1	2	1	10194	r		218	mosquito (Aedes albopictus)	chr3.122_4407974	chr3.122	4407974	A	G	standard	0.806	recommended
537911545	Affx-1249963892	AX-584472674	GGTACCGACCCTACAACATTGACAGAATAAATAAT[C/T]TTTATATGTTTGATCCTTTCTTCATCATAACTTCG	Y	2	1	2	1	10194	r		218	mosquito (Aedes albopictus)	chr2.122_3586003	chr2.122	3586003	C	T	standard	0.806	recommended
533407783	Affx-1250757480	AX-580025819	TTTTATTATTAGATTAGTTGGATTTTGAGCGAAAA[A/C]CATCTTTTGAGTTTTTGGAAACCACTGATGGGCTG	M	2	1	2	1	10194	f		218	mosquito (Aedes albopictus)	chr2.87_3938650	chr2.87	3938650	A	C	standard	0.806	recommended
533705373	Affx-1250890032	AX-580321734	TACCTCAGCACTAATACTTCTAAGCCTGCCATTGT[C/T]TTTACCCGCAATCAGGTATTTTGTCTAGTTCAAGT	Y	2	1	2	1	10194	r		218	mosquito (Aedes albopictus)	chr2.98_762703	chr2.98	762703	C	T	standard	0.806	recommended
535888044	Affx-1248957614	AX-582459407	TTACATTATACGTTAATAGTTAGATTCAGCTCAAA[A/T]CTTTCAATTTCTAAAAGTGAGAGAGGTTCCCAAAC	W	4	1	2	1	10194	f		218	mosquito (Aedes albopictus)	chr2.17_16361777	chr2.17	16361777	A	T	standard	0.806	recommended
537335348	Affx-1249675257	AX-583898535	TAAATGTCTTTTCATGCTTTTTGCAAGGGATTTTT[G/T]TGTGTGGGTCTAAATTTGAATATTGCTTAGATTGT	K	2	1	2	1	10194	r		218	mosquito (Aedes albopictus)	chr1.7_7517689	chr1.7	7517689	G	T	standard	0.806	recommended
535806469	Affx-1248924873	AX-582379147	AGTCATATACTATTTAAGTGATAGCCTTGAGAGAA[C/G]CCAGTTTAAAGTTGTCAGCCGTTCAATCTAGTGCA	S	4	1	2	1	10194	f		218	mosquito (Aedes albopictus)	chr3.74_465486	chr3.74	465486	C	G	standard	0.806	recommended
535832807	Affx-1248935872	AX-582405120	GAGAGCGAAAAGTGGCAAATATTGACTAGATAACG[A/G]CAACCGTATAGCCAGGGATGGGTGAAAATCCTTCG	R	2	1	2	1	10196	f		218	mosquito (Aedes albopictus)	chr2.17_8854898	chr2.17	8854898	A	G	standard	0.804	recommended
533446644	Affx-1250776816	AX-580064640	GATTTATTGGTATCTGTAAGCAAAATGAGTATGAT[A/C]ATTTTGATTGATCAATTGATCAAACAAATTGATCA	M	2	1	2	1	10196	f		218	mosquito (Aedes albopictus)	chr2.87_10456606	chr2.87	10456606	A	C	standard	0.804	recommended
537628759	Affx-1249823769	AX-584190827	TTAATGTTTGAGAATGAGTATACCGACCGACAAAT[C/G]AAGTAAACGTCTAGAACAAAAACGAACGAGATAGT	S	4	1	2	1	10196	f		218	mosquito (Aedes albopictus)	chr1.90_13238262	chr1.90	13238262	G	C	standard	0.804	recommended
535689970	Affx-1248883163	AX-582267579	AAAAAATAATATACTTACCAACATATGTAGCTAAA[A/C]AGCATTCATGCATGCAAGTCAAAACATTTTCCGCA	M	2	1	2	1	10196	f		218	mosquito (Aedes albopictus)	chr3.7_3999114	chr3.7	3999114	C	A	standard	0.804	recommended
533719762	Affx-1250896747	AX-580335774	ATTCCTGTTATTTTCCTTTCCCTAAACTGTTATAC[A/T]TTTGTAGGTAGGTGTCCTGCAATTGTAAAGGGCAC	W	4	1	2	1	10196	f		218	mosquito (Aedes albopictus)	chr3.1_3197250	chr3.1	3197250	A	T	standard	0.804	recommended
538469224	Affx-1249998497	AX-585023970	TCGATTGAATAAGTCAACGATCTGATGGCTTAGGA[A/G]TTGACGTAACGTAACGCGAACAGTGTTTCTACTTT	R	2	1	2	1	10196	r		218	mosquito (Aedes albopictus)	chr2.125_7382124	chr2.125	7382124	G	A	standard	0.804	recommended
537568967	Affx-1249794073	AX-584131178	ACTCTTAATCCATCTTTATTCAGGCTTTCCCAAAC[A/C]TGAGGATTGTATGTTTATGTTTTCCGACTGTGAAT	M	2	1	2	1	10196	f		218	mosquito (Aedes albopictus)	chr1.90_3723414	chr1.90	3723414	C	A	standard	0.804	recommended
533448797	Affx-1250777887	AX-580066789	ACACTGATAAGACCGATAACTTTGAACTAGAAACT[A/G]GAAGCTAGGAAAAACAATCTGAAAGCTGAAAGCTA	R	2	1	2	1	10196	f		218	mosquito (Aedes albopictus)	chr2.87_11873399	chr2.87	11873399	A	G	standard	0.804	recommended
534885231	Affx-1251320026	AX-581473140	TCGTGGGTGCGTGGGTGCATCTTCTTCGTATTTGA[C/T]GTCGTCAATTGGTTTCACAACGTTGTAGTGAGATT	Y	2	1	2	1	10196	r		218	mosquito (Aedes albopictus)	chr3.180_7772087	chr3.180	7772087	C	T	standard	0.804	recommended
538061637	Affx-1250105977	AX-584622138	TCGGAAGCGCAACGATTCTACTCATGTTGATGAGA[A/T]TCGCAACGACGAGCGGGTTTGCCGAAGTCAATTTG	W	4	1	2	1	10196	f		218	mosquito (Aedes albopictus)	chr2.155_11521928	chr2.155	11521928	T	A	standard	0.804	recommended
533735410	Affx-1250904324	AX-580351099	TCAACAAATAAAAAGAAGCGTTCTGAAAGGTAAGT[A/G]GAACTCATTGAAAAGTTTGCGAGTTCTATTTTATT	R	2	1	2	1	10196	f		218	mosquito (Aedes albopictus)	chr3.1_6583574	chr3.1	6583574	A	G	standard	0.804	recommended
533524221	Affx-1250814387	AX-580142153	ATTACTGGTAGAGGTTGAAGACATTATTATCTTTA[C/T]TACTGGCTTTAATTGAACTTTACAAGATTTTGGAT	Y	2	1	2	1	10196	r		218	mosquito (Aedes albopictus)	chr2.87_26059046	chr2.87	26059046	T	C	standard	0.804	recommended
537265289	Affx-1249640155	AX-583828874	ACGCTTCAATGAGGGAAAATTGGCGGATAAAAACA[G/T]TTTAACCGCTCGCTGGTACTCAATTTAGTGTTTTA	K	2	1	2	1	10196	r		218	mosquito (Aedes albopictus)	chr1.64_636591	chr1.64	636591	G	T	standard	0.804	recommended
537005126	Affx-1249510294	AX-583569814	CTATCTGAAAGCCTTTCACTGTTTCGCCGAAACTG[A/C]TGATGTTTAACGATGATTTCGTGTTTGATGTTTGA	M	2	1	2	1	10196	r		218	mosquito (Aedes albopictus)	chr1.170_1506420	chr1.170	1506420	A	C	standard	0.804	recommended
536512651	Affx-1249265312	AX-583078811	TTATATGCCGCACATAGCTTTAGTTGCATCAAACA[C/G]ACAGCGGTACTCATTAGCGTATTGTAGGAAGGGTT	S	4	1	2	1	10196	f		218	mosquito (Aedes albopictus)	chr1.102_176627	chr1.102	176627	C	G	standard	0.804	recommended
532884307	Affx-1250494835	AX-579502634	AAACAGGAAATTGCTACTTGATCGCGCGAGTTTGC[C/G]ATTCGTCGATTGTTTGATACCTAATTGGCAAAAAT	S	4	1	2	1	10196	r		218	mosquito (Aedes albopictus)	chr2.22_11445425	chr2.22	11445425	G	C	standard	0.804	recommended
535147613	Affx-1251422446	AX-581733226	AAATAGTATCGGCATGTGAATCAAAAGAGAATAAT[A/T]CTTCATTTCCGTACCTTATTGGAAACTTTCATAAA	W	4	1	2	1	10196	f		218	mosquito (Aedes albopictus)	chr3.29_6567509	chr3.29	6567509	A	T	standard	0.804	recommended
533896964	Affx-1250967099	AX-580511435	GCATGGATGAAATCCTGCACTGTTTCCGTTGACTG[C/T]TGTACGCGGTTGTTAAATTTATACCGCAGGATGAA	Y	2	1	2	1	10196	r		218	mosquito (Aedes albopictus)	chr3.116_6804687	chr3.116	6804687	C	T	standard	0.804	recommended
533312548	Affx-1250709838	AX-579930642	ATCAAAATTATCATCAACCTGCGCATTTCACAACA[C/T]TCCCTTCTTTATGCAAGTGAGCCAGAGCCCCAGCA	Y	2	1	2	1	10196	f		218	mosquito (Aedes albopictus)	chr2.82_6947192	chr2.82	6947192	C	T	standard	0.804	recommended
538623037	Affx-1250152364	AX-585176991	AGCTATGAAGTATGAATCTACCTCCCTGAACCATT[A/C]TTACCATTTATGCCGTCCTTTTGCCCAAAAACGAC	M	2	1	2	1	10196	r		218	mosquito (Aedes albopictus)	chr2.167_4536698	chr2.167	4536698	C	A	standard	0.804	recommended
533212435	Affx-1250659745	AX-579830595	AAATCCTTTCCAAAACTTTGTGTCTCATTTCAACT[C/T]GATCCGGCGTACGTTATATTAGCTTCTGTCTCATA	Y	2	1	2	1	10196	f		218	mosquito (Aedes albopictus)	chr2.62_185100	chr2.62	185100	T	C	standard	0.804	recommended
533170370	Affx-1250638557	AX-579788548	AGCACGCTTTATCCATATGTAGAATAAGCTGTCAA[A/G]CCTTCATATTTGTTCGTGAGTTTTAAGAAGAAGAG	R	2	1	2	1	10196	f		218	mosquito (Aedes albopictus)	chr2.60_11237627	chr2.60	11237627	G	A	standard	0.804	recommended
537998480	Affx-1250042795	AX-584559302	GTTACCTCGAAGTTGTTGGTTAATCATCTCTAAAG[C/T]TACAGGTTAAACTCAATCATGACATGAAACCTGTA	Y	2	1	2	1	10196	f		218	mosquito (Aedes albopictus)	chr2.140_15207180	chr2.140	15207180	C	T	standard	0.804	recommended
537232270	Affx-1249623692	AX-583796031	GGAGTTTTTTTTGTGTGTGTATGTGTGGAGAAATA[A/G]GGTTTTTGTAAAGGTACTTTTATGATGTTGAATGG	R	2	1	2	1	10196	r		218	mosquito (Aedes albopictus)	chr1.50_12885574	chr1.50	12885574	A	G	standard	0.804	recommended
537112852	Affx-1249564065	AX-583677095	TGTAGAACAAACTGCCCTGCCACTTCCCACGATTT[C/T]CTTTTTCTCGTTAGGTACTGAACAACGGTCCAAAC	Y	2	1	2	1	10196	r		218	mosquito (Aedes albopictus)	chr1.36_789725	chr1.36	789725	C	T	standard	0.804	recommended
536984326	Affx-1249499996	AX-583549063	CGATCGAGGTGCATCTCTTTGCTGCCACAATTGAT[A/T]AGCTTTCTAATTGCTGCCATTCAATCGAAGCGCCA	W	4	1	2	1	10196	r		218	mosquito (Aedes albopictus)	chr1.161_63797	chr1.161	63797	T	A	standard	0.804	recommended
536845663	Affx-1249430768	AX-583410758	TTAATATATTTTGGTGCTTCTACTAGCATGGTAGT[A/G]TTCGTAGGAGTATAAGTTTATGTATTACGTTCTTA	R	2	1	2	1	10196	r		218	mosquito (Aedes albopictus)	chr1.147_1433655	chr1.147	1433655	A	G	standard	0.804	recommended
536737530	Affx-1249377823	AX-583302898	GTAACTATAGTCAACAAGAGTTATAAAAATTGACA[C/T]TAATCAGAGGAAAGTAGTTAAAACCGTTTGAATTA	Y	2	1	2	1	10196	f		218	mosquito (Aedes albopictus)	chr1.139_2517692	chr1.139	2517692	T	C	standard	0.804	recommended
535207637	Affx-1251445978	AX-581792625	CGCAAAGCTGGCTTTCGGTAAGTGCATTCTGTGTA[A/T]TTTATGCTGCGTAATATTCTTTGTTCCCTGCTAAA	W	4	1	2	1	10196	r		218	mosquito (Aedes albopictus)	chr3.39_1754910	chr3.39	1754910	T	A	standard	0.804	recommended
534271037	Affx-1251117114	AX-580874965	AGACATAACCCAGTTTTAAAATTGTTTTCCAGAAG[A/T]TTAAGTTTATTCATTGTTGACGCTTACAGATCCTT	W	4	1	2	1	10196	r		218	mosquito (Aedes albopictus)	chr3.151_8594846	chr3.151	8594846	A	T	standard	0.804	recommended
538072331	Affx-1250116679	AX-584632784	TAAGTTAATTAAGAAGTGATCTGCGAATCCGTACA[C/T]AAATTTGCGAGTGACGAGAAAAAAAAAAGTGAGTG	Y	2	1	2	1	10196	f		218	mosquito (Aedes albopictus)	chr2.155_20186256	chr2.155	20186256	C	T	standard	0.804	recommended
533879884	Affx-1250960123	AX-580494654	AGACAAGAAATCCTGAATTACATGGAAAGTTTGTA[A/G]GTATGTAACAGTTTAGTAGTTCAAGGATGTTTTCG	R	2	1	2	1	10196	r		218	mosquito (Aedes albopictus)	chr3.116_2207661	chr3.116	2207661	A	G	standard	0.804	recommended
537229933	Affx-1249622523	AX-583793697	TCCTAAGGCTCCGCGCGCATGTGTTAATACAAGCG[A/C]TTTCAGTTTTACGCATTTGGACTCACACTTTCGTC	M	2	1	2	1	10196	r		218	mosquito (Aedes albopictus)	chr1.50_12283996	chr1.50	12283996	A	C	standard	0.804	recommended
536549798	Affx-1249283898	AX-583115848	AAAACCATGAATTTGGATTTTATTGCCAAAACAAT[A/T]TAGTATAAAAATATCAAGGAATAATAATTTCGAAA	W	4	1	2	1	10196	f		218	mosquito (Aedes albopictus)	chr1.106_5174908	chr1.106	5174908	T	A	standard	0.804	recommended
534458923	Affx-1251183277	AX-581060081	GAAAACAACAAAGGCTGGAAGGACTGGCTGCTCAG[C/T]TCGATCTCGTCTTCGTACGTAGCATATAAAAAATA	Y	2	1	2	1	10196	r		218	mosquito (Aedes albopictus)	chr3.166_1275270	chr3.166	1275270	C	T	standard	0.804	recommended
533370045	Affx-1250737196	AX-579988105	TCCTAATTGAACAGAACCGTGTTGGGATCTTCATT[A/G]TCCATTTGTTTAACGTGCCGTAGGACATCTTTTTT	R	2	1	2	1	10196	r		218	mosquito (Aedes albopictus)	chr2.82_19351531	chr2.82	19351531	G	A	standard	0.804	recommended
537707171	Affx-1249861758	AX-584268977	TGTAGTTCTTGTCACGGTCGCCATGTTCGTTCACG[C/T]TGTACTTCACTTAAGGACTTTCTTCATACTCATTG	Y	2	1	2	1	10196	r		218	mosquito (Aedes albopictus)	chr1.92_537718	chr1.92	537718	C	T	standard	0.804	recommended
535819762	Affx-1248930314	AX-582392240	CAGGTTATTGAAAAAGTATCTAAGGTAGCAAAGTC[A/G]ATGTGCTTGTGGGTGATAGCCGTTGAACGATATGC	R	2	1	2	1	10196	f		218	mosquito (Aedes albopictus)	chr3.74_1541238	chr3.74	1541238	G	A	standard	0.804	recommended
535823686	Affx-1248932021	AX-582396125	GATCGAAGAACTAAGTACTTGGCCGGAGGGTTTCA[A/C]GTACTTAACTTGCATGATGCAAATTGCATCTCTGT	M	2	1	2	1	10196	r		218	mosquito (Aedes albopictus)	chr3.74_2181882	chr3.74	2181882	C	A	standard	0.804	recommended
535073316	Affx-1251396750	AX-581659797	ACAAACTGAACTCACAATTTTATTCTTGAGTAAAT[C/T]TTGTACCCTGTATTTGACTTTCTCTGTTCATGATG	Y	2	1	2	1	10196	r		218	mosquito (Aedes albopictus)	chr3.27_4688038	chr3.27	4688038	C	T	standard	0.804	recommended
534086651	Affx-1251054117	AX-580698396	CAGCAACTATCCAATGTAAGCACTGCGGCTGTAAA[C/G]TATAACATCAGGATTAGCACGTGCATAGGGGGCTA	S	4	1	2	1	10196	f		218	mosquito (Aedes albopictus)	chr3.142_1079017	chr3.142	1079017	G	C	standard	0.804	recommended
538752731	Affx-1250282074	AX-585306318	AATAAATTCCAACCGACTCAATTGGCATTCGAGAG[C/T]ATTTCAACCGTTTGGCGTGAGCATAATTGGTATTT	Y	2	1	2	1	10196	r		218	mosquito (Aedes albopictus)	chr2.186_11373013	chr2.186	11373013	C	T	standard	0.804	recommended
533161657	Affx-1250634207	AX-579779840	CCTTTTCTGAGTTTATGTCTATAGTTGACGAAGCT[A/G]AAAAGAACGCATTCGACCGCATGAAACACCAGTTT	R	2	1	2	1	10196	f		218	mosquito (Aedes albopictus)	chr2.60_9406006	chr2.60	9406006	G	A	standard	0.804	recommended
536728855	Affx-1249373455	AX-583294242	TAAATTGTGTTTAAATGTCAAAGAAAGATTATTGA[A/C]AAAAGCTGTGTTTTTGGGTCGATTTTAAACCGACG	M	2	1	2	1	10196	f		218	mosquito (Aedes albopictus)	chr1.138_56491	chr1.138	56491	A	C	standard	0.804	recommended
534901049	Affx-1251326173	AX-581488666	TGAAAGACATTCGCCATTCGGCTTAACCTGATAAA[A/G]ACCGGTTCAGCCGGAAGAAAATCCGACACACTTAA	R	2	1	2	1	10196	f		218	mosquito (Aedes albopictus)	chr3.180_10809205	chr3.180	10809205	A	G	standard	0.804	recommended
534294717	Affx-1251128346	AX-580898000	TACAAAGACCGTCAACACGTTAAATGTATCTTCAT[C/T]TTATGTTTACCCTCTACACGGAAACGGTTACTTTT	Y	2	1	2	1	10196	r		218	mosquito (Aedes albopictus)	chr3.159_892527	chr3.159	892527	T	C	standard	0.804	recommended
535857052	Affx-1248945130	AX-582428888	TTCCTAGATATATGTATCAAAAGGTTATGCACAAT[A/T]CCAATTTGATCAATTGCAGTACACAGGAGAACAAG	W	4	1	2	1	10196	f		218	mosquito (Aedes albopictus)	chr2.17_12001634	chr2.17	12001634	A	T	standard	0.804	recommended
534328320	Affx-1251143395	AX-580931117	CCGATCAGGAGCACGTTGTAGACATTCTTGCTACT[C/T]CGATTTTCGATTCGAGGAATCTGTTTTGATGTAGA	Y	2	1	2	1	10196	r		218	mosquito (Aedes albopictus)	chr3.16_3996768	chr3.16	3996768	T	C	standard	0.804	recommended
537901862	Affx-1249960303	AX-584463038	AATTAATTCAGCATGAGCCTAGTTAACATTATGAT[A/G]ATTCAGATACAACCTATGCTCGGGCTCTGTTCACA	R	2	1	2	1	10196	f		218	mosquito (Aedes albopictus)	chr2.122_1576460	chr2.122	1576460	A	G	standard	0.804	recommended
533418943	Affx-1250763025	AX-580036975	ACGCTTACGTTCGCAGATGGAAACCAGTAAGAACT[C/G]CGAGTATTCCACATTCATCTCCTTTCACCGAATGC	S	4	1	2	1	10196	f		218	mosquito (Aedes albopictus)	chr2.87_5743869	chr2.87	5743869	G	C	standard	0.804	recommended
536348241	Affx-1249183116	AX-582914892	GTTTGTTTCAAATCGTTATTTTTGGTTTAATGCAA[A/C]ATAAGTTCATTTCAAAACTACTAATTATTTGAATT	M	2	1	2	1	10196	f		218	mosquito (Aedes albopictus)	chr3.82_662109	chr3.82	662109	C	A	standard	0.804	recommended
537899576	Affx-1249959157	AX-584460757	ATGAAATCCTGCGGATCTTTAAAGCTTACGAAACC[A/G]TAACCCTTGCTTTTGCTCGTTCGTTTGTCCCGTAT	R	2	1	2	1	10196	f		218	mosquito (Aedes albopictus)	chr2.122_1265454	chr2.122	1265454	G	A	standard	0.804	recommended
535514989	Affx-1248827392	AX-582095979	TCCACACAGCCACTAAGTTATTCATCAGGCGTGTG[C/G]TACCTTAATTGATCGAAATTGCCTCCATTATTGCA	S	4	1	2	1	10196	r		218	mosquito (Aedes albopictus)	chr3.62_108170	chr3.62	108170	G	C	standard	0.804	recommended
536655281	Affx-1249336580	AX-583220968	AACCTCCCTAAAACTAATTGAACCTCGAATTCTAA[A/G]AAATACGATAGAAAAATAACGTATGTTAGTGAAAA	R	2	1	2	1	10196	f		218	mosquito (Aedes albopictus)	chr1.124_5066612	chr1.124	5066612	G	A	standard	0.804	recommended
538735073	Affx-1250264415	AX-585288688	CCTTTGCGCGCGCGAGCGGCAGTCCATGGGGCACG[C/G]TTTGCTTCTGTTGCATCTCTAATTTTGATGCTGTG	S	4	1	2	1	10196	r		218	mosquito (Aedes albopictus)	chr2.186_4741334	chr2.186	4741334	C	G	standard	0.804	recommended
537052919	Affx-1249535912	AX-583617398	GGGGTCTACTACTGAGCAATATCTCAAAGTTCAAA[A/T]TCATTGCAGAACGAGAAGAATCAGATCATGAAGTC	W	4	1	2	1	10196	f		218	mosquito (Aedes albopictus)	chr1.25_8845145	chr1.25	8845145	T	A	standard	0.804	recommended
538011905	Affx-1250056223	AX-584572666	TGTCTACTGTTAAATATTCATTTACAAAGTGATAG[A/G]CAAAGATCGGCCTCAACAACCACGTTACAATTTTC	R	2	1	2	1	10196	f		218	mosquito (Aedes albopictus)	chr2.140_23434120	chr2.140	23434120	A	G	standard	0.804	recommended
536693835	Affx-1249355927	AX-583259339	CAGGACGCAGCATGGTAGGTATAATCATCCCATAG[A/G]TAGGTTCGCTGGTCTTCACGGAATGGGTGGATTTC	R	2	1	2	1	10196	f		218	mosquito (Aedes albopictus)	chr1.131_7141658	chr1.131	7141658	G	A	standard	0.804	recommended
538692080	Affx-1250221414	AX-585245838	TTTTTCATGTTGGTTGATTTAATTGCTAGTTATTG[C/T]ATTGTAATCGATATTGCAGTAGTTAAAAAAACTCA	Y	2	1	2	1	10196	r		218	mosquito (Aedes albopictus)	chr2.177_3646446	chr2.177	3646446	T	C	standard	0.804	recommended
537675570	Affx-1249845767	AX-584237475	CGTGTAGGAAAAGACAATTGTAATTTAAAGATTAT[C/T]TGTTAAGTAGCGCTGTACAAATCGAATCAATGACG	Y	2	1	2	1	10196	r		218	mosquito (Aedes albopictus)	chr1.91_3504590	chr1.91	3504590	T	C	standard	0.804	recommended
534110034	Affx-1251065560	AX-580721692	ATGAAGATGGCCAAATCCCAATCGATCAGATAGAA[A/G]TTCTGCAAGAAATGTACTCATTAACATCCTTCGCC	R	2	1	2	1	10196	r		218	mosquito (Aedes albopictus)	chr3.142_5646197	chr3.142	5646197	G	A	standard	0.804	recommended
536898829	Affx-1249458554	AX-583463835	GCGGGCGTAACAGACTCCATAAGTGACTCAAATCG[A/G]TCATTTGTATGCGTTCGCTGCACAGAAGAGGCCCG	R	2	1	2	1	10196	f		218	mosquito (Aedes albopictus)	chr1.149_1855242	chr1.149	1855242	G	A	standard	0.804	recommended
537149278	Affx-1249584201	AX-583713364	GGGTCAGGTCTTGTATTGTGCGCCATAAAACTGAG[C/T]CAAATTTAGTGCCAATAAACAATAACATTTCAACA	Y	2	1	2	1	10196	f		218	mosquito (Aedes albopictus)	chr1.41_4438657	chr1.41	4438657	C	T	standard	0.804	recommended
537798132	Affx-1249908330	AX-584359630	CTCACATAAAAATTAGGGTGTCAGCCACAGTAAGT[A/T]AAACAATTGACTGATATTCCACTGAAACAAAAACT	W	4	1	2	1	10196	f		218	mosquito (Aedes albopictus)	chr2.103_7005873	chr2.103	7005873	A	T	standard	0.804	recommended
537763506	Affx-1249891064	AX-584325064	TTAGTACTACCAACGTACTAGACGTATCGAAAAAT[G/T]AATATTAAACTACTAATTTATTTAGCGAAAATAAT	K	2	1	2	1	10196	f		218	mosquito (Aedes albopictus)	chr2.103_1982292	chr2.103	1982292	G	T	standard	0.804	recommended
535816260	Affx-1248928833	AX-582388797	GATTTCTTATTAATTTACTTAGTAATCGTTTTTTT[C/T]CTTCCATTCCCTTTGATCATGTTTATATGTGTATA	Y	2	1	2	1	10196	r		218	mosquito (Aedes albopictus)	chr3.74_1317327	chr3.74	1317327	C	T	standard	0.804	recommended
537051352	Affx-1249535141	AX-583615855	GAAGTTATTTAGCACTGCCGCATCATCACAGGATA[C/G]CAACAAGGATGGAGTTAGTGATCAGTGCAGTGGGC	S	4	1	2	1	10196	f		218	mosquito (Aedes albopictus)	chr1.25_7209505	chr1.25	7209505	C	G	standard	0.804	recommended
536539681	Affx-1249277805	AX-583105766	CGCTTCTCTTTGAATTCTCGGATGATTTATAATAA[C/T]TTTGAGTTGTTAGTGCGGTTTAGTAAGACAATGAT	Y	2	1	2	1	10196	r		218	mosquito (Aedes albopictus)	chr1.106_1276925	chr1.106	1276925	C	T	standard	0.804	recommended
538605041	Affx-1250134363	AX-585159055	TTTCTGTTCAGCCAGATGGAAAACGCCGTCGTCAT[G/T]TGGATGGATATTTAGAAGTGCTAAAGATTCTCTAC	K	2	1	2	1	10196	r		218	mosquito (Aedes albopictus)	chr2.163_6713271	chr2.163	6713271	G	T	standard	0.804	recommended
533137963	Affx-1250621456	AX-579756161	AGGTATACATTTATTTGTAATCTCTAAGGAAGAGT[A/T]AGCCTATTATGATATTCTAGTTTCTTTATAAATCT	W	4	1	2	1	10196	r		218	mosquito (Aedes albopictus)	chr2.60_2285666	chr2.60	2285666	A	T	standard	0.804	recommended
537564004	Affx-1249789755	AX-584126232	AAAGGGTGCATGCATTGAATGTAGTGGTTAATCAT[A/C]ATTGCCATTGGTAATCAACAGAAAGTTTACATAAT	M	2	1	2	1	10196	r		218	mosquito (Aedes albopictus)	chr1.90_2359072	chr1.90	2359072	A	C	standard	0.804	recommended
533720812	Affx-1250897270	AX-580336816	CTGTTTTATCACTTTCCTACACTAAATGACCATCG[C/T]ATGATAGCTATTAATAATGCGTTGACCTAATCCCA	Y	2	1	2	1	10196	f		218	mosquito (Aedes albopictus)	chr3.1_3462068	chr3.1	3462068	T	C	standard	0.804	recommended
536144223	Affx-1249080294	AX-582711372	TGGGGATCCATTCGGCTTCGTATACGATATCTGGA[C/T]GATTTAGTAATGCCCTGCGATGAGTACAGTCCCCT	Y	2	1	2	1	10196	r		218	mosquito (Aedes albopictus)	chr3.75_7090388	chr3.75	7090388	C	T	standard	0.804	recommended
536370812	Affx-1249193342	AX-582937407	GTGAAAGGTGTTAAAAGAAAAAAAAAGTGGCACAA[C/T]TCTGAATAAACGGAAACTAAATATTCAAAAGTGAA	Y	2	1	2	1	10196	r		218	mosquito (Aedes albopictus)	chr3.82_4016585	chr3.82	4016585	T	C	standard	0.804	recommended
536303736	Affx-1249159887	AX-582870571	GACGTATGTGTACTAGAGTTCGCGGAACAATTTAG[C/T]GTTTATCCTTAACAATTATACCGTAATGAACAACA	Y	2	1	2	1	10196	r		218	mosquito (Aedes albopictus)	chr3.77_15297751	chr3.77	15297751	T	C	standard	0.804	recommended
538016173	Affx-1250060491	AX-584576928	CGGGCCTGTTGAAGTTGTATACTGATCCCTGAACC[A/C]AAGTTTTCATACACTTTATTTCAATAGCTTATGAT	M	2	1	2	1	10196	f		218	mosquito (Aedes albopictus)	chr2.140_24234152	chr2.140	24234152	A	C	standard	0.804	recommended
537700328	Affx-1249858374	AX-584262168	AATCTTGGGCCCGTCGTGGGGTGCTTGCCTGTGGG[G/T]TTAGGATTTTATTGCTGCGAGGGATAATTAACTTT	K	2	1	2	1	10196	r		218	mosquito (Aedes albopictus)	chr1.91_7516726	chr1.91	7516726	G	T	standard	0.804	recommended
537619164	Affx-1249818975	AX-584181255	GAACATCGCTGATGTCGATTAATAGATCTGAAATA[A/G]AAAAGAACAGGAACAATATTAAACGATTGAAACAA	R	2	1	2	1	10196	f		218	mosquito (Aedes albopictus)	chr1.90_11641270	chr1.90	11641270	G	A	standard	0.804	recommended
533539275	Affx-1250821919	AX-580157193	ACCTACTAATTTCCGTCTACACATACTGCGGTTTT[C/T]ATTTTTAATGCCCGCACAGATCTGAAGAGTTATTG	Y	2	1	2	1	10196	r		218	mosquito (Aedes albopictus)	chr2.87_29948317	chr2.87	29948317	T	C	standard	0.804	recommended
537882752	Affx-1249950736	AX-584443991	AGCTGTTTAGTTAGGATGGTAAGGTGCCAAAGGTA[A/T]GGAAAAAAGTCCGTTCCTCTCAACAGGAAGTTACG	W	4	1	2	1	10196	f		218	mosquito (Aedes albopictus)	chr2.118_3591985	chr2.118	3591985	A	T	standard	0.804	recommended
537177734	Affx-1249596478	AX-583741734	GAGAAGAAGGTTTCTTCCTTCATCAGTGCCAGTGG[C/T]TTGATTGACACGTGTCACGTTGAAATGCGTCTTTT	Y	2	1	2	1	10196	r		218	mosquito (Aedes albopictus)	chr1.41_10249748	chr1.41	10249748	T	C	standard	0.804	recommended
532821758	Affx-1250463583	AX-579440114	CGAGAGACGGGAGAAAATACGATATACTGGAGAAG[C/T]TTATTTAGTAGGTCAGTAGTAGCGCTCTCGCTTTG	Y	2	1	2	1	10196	r		218	mosquito (Aedes albopictus)	chr2.205_9065656	chr2.205	9065656	T	C	standard	0.804	recommended
537661581	Affx-1249840201	AX-584223521	AGCGTACACTGATGCAGATAGGGTCAAAATAAAAA[C/T]TATATTTATAACCAATTTTTGAACTGTGAGTACAA	Y	2	1	2	1	10196	f		218	mosquito (Aedes albopictus)	chr1.91_1315415	chr1.91	1315415	T	C	standard	0.804	recommended
535519359	Affx-1248828414	AX-582100224	CACACTCCAAAATTAGCTTTAACACTAACAATTCA[A/C]AAAATAGCGCAGGTAATAATGCGGTAAACTTCTTC	M	2	1	2	1	10196	f		218	mosquito (Aedes albopictus)	chr3.63_415140	chr3.63	415140	A	C	standard	0.804	recommended
535063924	Affx-1251391672	AX-581650452	CCAAAAATAGCTCCTGGTGTTATCCCAGAAGCAAT[A/G]CATGAGGAAATCCGAAAAAATCTCTGAAAGAATTT	R	2	1	2	1	10196	f		218	mosquito (Aedes albopictus)	chr3.27_2447259	chr3.27	2447259	G	A	standard	0.804	recommended
533704261	Affx-1250889665	AX-580320638	AAAGTGTGAGGACTGAATCATATTGTTGACTGCCT[C/G]TGTCAGTTTAGGAGTTATGAAAGAAGAACATTTTT	S	4	1	2	1	10196	r		218	mosquito (Aedes albopictus)	chr2.97_15461557	chr2.97	15461557	G	C	standard	0.804	recommended
535356924	Affx-1251498119	AX-581940151	ATCTAGATACAGAAATTACTAACAGTGAATAATAT[G/T]AAAACTATTTAATGATTTTCCGCAAACAAAAATAA	K	2	1	2	1	10196	f		218	mosquito (Aedes albopictus)	chr3.49_1505333	chr3.49	1505333	T	G	standard	0.804	recommended
535047639	Affx-1251384464	AX-581634277	TCCAATTCGATGCATTACAGTGAGAGTATTGAAAA[G/T]CAAACAGCTCGTTCGGTCAGAAGAAAGATAATATT	K	2	1	2	1	10196	f		218	mosquito (Aedes albopictus)	chr3.20_13619232	chr3.20	13619232	G	T	standard	0.804	recommended
535655841	Affx-1248871094	AX-582233910	GCGAATCAATCAGTGGCGTCAGCATTGTGGTACTC[A/C]TTGCATCTCTAGTTTCACTCATTTTCAATGCTCTT	M	2	1	2	1	10196	r		218	mosquito (Aedes albopictus)	chr3.69_9551321	chr3.69	9551321	A	C	standard	0.804	recommended
538232614	Affx-1250276986	AX-584792610	TCAAACATTATACATATATAAATCGGCACAAATAA[A/G]TGAATAACTAATAATGCTTTCTTTAAAAAAGATTT	R	2	1	2	1	10196	f		218	mosquito (Aedes albopictus)	chr2.186_9866456	chr2.186	9866456	A	G	standard	0.804	recommended
537658089	Affx-1249838451	AX-584220036	ACTTCCTGCACTGCAATTTAGCACGATCAACAGTA[C/T]AGAAGCTGGTCATACATTGATCAGAAATAAATGGA	Y	2	1	2	1	10196	f		218	mosquito (Aedes albopictus)	chr1.91_1123493	chr1.91	1123493	C	T	standard	0.804	recommended
538748266	Affx-1250277609	AX-585301857	ACAACAGTTCGTTTAATGAAATTCGCTTAGAAAGA[A/T]TACTATTTCATGCCTTTTGCTGGTTTAAATCCAGT	W	4	1	2	1	10196	r		218	mosquito (Aedes albopictus)	chr2.186_10061330	chr2.186	10061330	T	A	standard	0.804	recommended
536638703	Affx-1249328368	AX-583204426	AAAAAAACTTGCAGGCCTATAACTGCCAGTCAAAT[C/T]TAACAGGTGGCGCAGCCCTAGTCTCAAGTGGAATC	Y	2	1	2	1	10196	f		218	mosquito (Aedes albopictus)	chr1.124_1873169	chr1.124	1873169	C	T	standard	0.804	recommended
533377838	Affx-1250741119	AX-579995895	GAGTTGAATTTTACTTAAAACCTAGTTAAAAAGTT[G/T]GCATTCAAGTTTCAACCAAAATGTACCAGTTTAAC	K	2	1	2	1	10196	r		218	mosquito (Aedes albopictus)	chr2.82_20283872	chr2.82	20283872	T	G	standard	0.804	recommended
535565380	Affx-1248842132	AX-582145293	TAAACATAATTAATTTCATAACTACCAACAGAATC[A/G]AAACAGTAGTGCAGTAATTTCATTCTTTCTAACGA	R	2	1	2	1	10196	f		218	mosquito (Aedes albopictus)	chr3.66_3324720	chr3.66	3324720	A	G	standard	0.804	recommended
535609825	Affx-1248856590	AX-582188891	AGTTTCCCTAGCTGTTTGTTTCTGTGTGTGTACAC[A/G]ATTCTCACCATTTGCGGATGATTAAGATTTGCATT	R	2	1	2	1	10196	r		218	mosquito (Aedes albopictus)	chr3.69_3137797	chr3.69	3137797	G	A	standard	0.804	recommended
536054753	Affx-1249036034	AX-582622088	TTGCTGGATAAGTTCCATAAGCAAAATGGAAGAAT[A/C]ATATCACGCATGTCTAGAGGTAATCCCAGAGAAAA	M	2	1	2	1	10196	f		218	mosquito (Aedes albopictus)	chr2.172_3996479	chr2.172	3996479	C	A	standard	0.804	recommended
536405047	Affx-1249210420	AX-582971511	GTCTATTGCAATTACTGTTTGTGGACCGGATGGTG[A/C]ATTCTATCTCTTGATTATTTAGTATTGAACTTTGA	M	2	1	2	1	10196	r		218	mosquito (Aedes albopictus)	chr3.90_46832	chr3.90	46832	A	C	standard	0.804	recommended
538230334	Affx-1250274706	AX-584790333	TTGTCTAGACTCGATGATGCTTGATGAAGAAAAAT[A/G]TTTCCAATAACAAGATAACGGGAAAATGGGGTTCA	R	2	1	2	1	10196	f		218	mosquito (Aedes albopictus)	chr2.186_8843173	chr2.186	8843173	G	A	standard	0.804	recommended
533420262	Affx-1250762304	AX-580038291	GAAAGTAGATTGACATTTTCGAAGTTGAAATAATT[A/C]GATCTCATAGCCGTTCATCTAATCATTTTTTCCTA	M	2	1	2	1	10196	r		218	mosquito (Aedes albopictus)	chr2.87_5459295	chr2.87	5459295	C	A	standard	0.804	recommended
533125065	Affx-1250614990	AX-579743294	CTAGAGACGAGAAATCTGTTGAATTCAGATAGAAA[C/T]AAATTCTTTCGATACGCAACACTCAATAATCGCAA	Y	2	1	2	1	10196	r		218	mosquito (Aedes albopictus)	chr2.57_1166487	chr2.57	1166487	T	C	standard	0.804	recommended
537537596	Affx-1249776528	AX-584099936	GAAATTTAGCTGCTGCTGGTGAGCGCTTGGCTGTG[C/T]TAAAGGTCAATCAACTGACCGTAGATAAATGGTAC	Y	2	1	2	1	10196	r		218	mosquito (Aedes albopictus)	chr1.85_28019982	chr1.85	28019982	T	C	standard	0.804	recommended
533398326	Affx-1250752745	AX-580016369	TAAATAACCCGTAAGATGCAGATGATGATTGGACA[G/T]GCGCACTGTAATTGATACGCAAAAAGACGAGATAG	K	2	1	2	1	10196	f		218	mosquito (Aedes albopictus)	chr2.87_1165041	chr2.87	1165041	T	G	standard	0.804	recommended
534775855	Affx-1251281985	AX-581365495	CCAGTTGCGTCGGTTCCAACATCTATGCAAGATAA[C/G]CCGATTCAGGACAATCGTGTTTCGTTCTCTATCTC	S	4	1	2	1	10196	f		218	mosquito (Aedes albopictus)	chr3.176_313463	chr3.176	313463	G	C	standard	0.804	recommended
533001899	Affx-1250553523	AX-579620185	GCTTTGTGGGTTGTCAACAATGTTTAACTAGCTGT[C/T]GTTGAGATGGTTTACGCTTACCTACAGTAGAATGG	Y	2	1	2	1	10196	r		218	mosquito (Aedes albopictus)	chr2.40_1967300	chr2.40	1967300	C	T	standard	0.804	recommended
538364689	Affx-1250409085	AX-584924330	ATCATAATCATGCATAATCGATTTGTAATTTGAAA[A/G]CTAGCATCTTAAAACCACACTGCAAAGTACACCGT	R	2	1	2	1	10196	f		218	mosquito (Aedes albopictus)	chr2.196_13779163	chr2.196	13779163	G	A	standard	0.804	recommended
535656780	Affx-1248871089	AX-582234838	TGATTTAACCCTTAATCCTTCAAGATGACATCAAA[C/T]AAGAATTTTCGTGTGATGGGCTTCATTTATACCGG	Y	2	1	2	1	10196	f		218	mosquito (Aedes albopictus)	chr3.69_9551108	chr3.69	9551108	C	T	standard	0.804	recommended
537543238	Affx-1249779371	AX-584105524	CACAACAGTTGTTTTCACTGCTTTATCACCTTGTT[C/G]CACTTTGCATATGTTCTTCTTAGCATTTCATCCAC	S	4	1	2	1	10196	r		218	mosquito (Aedes albopictus)	chr1.87_1297897	chr1.87	1297897	C	G	standard	0.804	recommended
533784923	Affx-1250926417	AX-580399805	AACAGAGGCACGTTGCATATCCATGCAAGAATGAA[C/T]GTATGGAATGAAGCCATATACTTGTGAATTGAATC	Y	2	1	2	1	10196	f		218	mosquito (Aedes albopictus)	chr3.109_2086522	chr3.109	2086522	T	C	standard	0.804	recommended
537603358	Affx-1249809571	AX-584165500	AACATTTCGAAAAGCGGAATCCAAATAAAATATTT[C/T]CTGATGTTTTCCTTGTTCTTAATTTCAGCATAGCG	Y	2	1	2	1	10196	r		218	mosquito (Aedes albopictus)	chr1.90_8054439	chr1.90	8054439	C	T	standard	0.804	recommended
536276182	Affx-1249146157	AX-582843059	TTGTTTTCTGGGTCATGTTAAAATTGACAAATTTG[A/G]TATTTTTGAAGTTGTAGTGATAATATTTTCCACGA	R	2	1	2	1	10196	r		218	mosquito (Aedes albopictus)	chr3.77_8926879	chr3.77	8926879	A	G	standard	0.804	recommended
537192942	Affx-1249606064	AX-583756830	GCGCCACTGAGTTATGTTGGAAACGTAATACGAAT[A/C]AAACAGATAATACAGCTTTGGGATAAAGATTTAAA	M	2	1	2	1	10196	f		218	mosquito (Aedes albopictus)	chr1.50_4500742	chr1.50	4500742	C	A	standard	0.804	recommended
537818530	Affx-1249917406	AX-584379999	GCGAAGCAATCCCATTACCTACATCTATTCGTTTA[A/C]GTTTACTGATTCGAAGTTTATAATCCAAAACCCAT	M	2	1	2	1	10196	r		218	mosquito (Aedes albopictus)	chr2.103_9540273	chr2.103	9540273	C	A	standard	0.804	recommended
535230383	Affx-1251453695	AX-581815088	TCCAAATGGTTCAGCACCCTAGTACTGTAAGAACT[G/T]TAGCATTTTTCTTCTTTTCCCTTTCGCAGAGAAAA	K	2	1	2	1	10196	f		218	mosquito (Aedes albopictus)	chr3.40_3035437	chr3.40	3035437	G	T	standard	0.804	recommended
538009373	Affx-1250053690	AX-584570166	GCCAAACAGCAAAAGTTTATCACTCAAGTGGAGAA[A/G]CAAGTGAAAAGCGGAGGTCAACATAACCTGCTGAA	R	2	1	2	1	10196	f		218	mosquito (Aedes albopictus)	chr2.140_21117984	chr2.140	21117984	A	G	standard	0.804	recommended
535972153	Affx-1248994595	AX-582539664	TTGTTTGTATTAACTCATTAGACCTGAAAGGGAAT[A/T]ACATAACTAAGAGTAAGACTAAGTGTTAAAGGTGC	W	4	1	2	1	10196	f		218	mosquito (Aedes albopictus)	chr2.17_30648015	chr2.17	30648015	T	A	standard	0.804	recommended
533282147	Affx-1250693334	AX-579900281	GCGTATATCTGCTGGGTGGTATTGGCATCACTGAT[A/G]CTTTGATAGAGTTGCACATTGCTATCGAATGGTAA	R	2	1	2	1	10196	r		218	mosquito (Aedes albopictus)	chr2.68_5477574	chr2.68	5477574	A	G	standard	0.804	recommended
538676237	Affx-1250205571	AX-585230031	CCAATAAACACAATTTAAGGATGTACAAACTTCAA[A/T]GTAAATAGAGCAATGAAGTGCAATCACTTTTAAAC	W	4	1	2	1	10196	r		218	mosquito (Aedes albopictus)	chr2.175_9881202	chr2.175	9881202	A	T	standard	0.804	recommended
536074655	Affx-1249046015	AX-582641957	TACGGAATGCGGAAAGACGTTTTCATAAATTTGAA[C/G]TTTGCGCCAAATCGTTGTTTTCTGTTATTTTTTAA	S	4	1	2	1	10196	f		218	mosquito (Aedes albopictus)	chr2.172_8125835	chr2.172	8125835	C	G	standard	0.804	recommended
533999215	Affx-1251011564	AX-580611372	GTTGCTAAGCCGAGAAAGATAAAGGCTTATAAATG[C/T]ATGAAAAAAAAAAACAACAAAGGCTTTAACTCATA	Y	2	1	2	1	10196	f		218	mosquito (Aedes albopictus)	chr3.127_1704614	chr3.127	1704614	T	C	standard	0.804	recommended
537320269	Affx-1249667679	AX-583883544	AAAAAATAATAAACAAAATGCACCATTGACGCTCA[A/T]TTTGAAATATAACCATTGTAATCGCTGTATCCCCT	W	4	1	2	1	10196	r		218	mosquito (Aedes albopictus)	chr1.7_4119414	chr1.7	4119414	T	A	standard	0.804	recommended
534336257	Affx-1251144813	AX-580938528	CGATTTTTTTATTATCTAGAAAACATGCGTATGAA[A/G]TAATAGCTGAACTCTTTAGGAGATTAAAAACTCTT	R	2	1	2	1	10196	f		218	mosquito (Aedes albopictus)	chr3.16_5257633	chr3.16	5257633	A	G	standard	0.804	recommended
533780275	Affx-1250923524	AX-580395254	TTATTTGTCATCCATGAGTCTTACTTGATTCATAC[C/T]TTTAACTAAATGACTACAAAACAAATCACACGGAA	Y	2	1	2	1	10196	r		218	mosquito (Aedes albopictus)	chr3.109_854413	chr3.109	854413	C	T	standard	0.804	recommended
537829646	Affx-1249924095	AX-584391061	ATATAAGAATTCTATATATTACCACAATTAGCAAA[A/C]TGGTCGATGTGATTGATGATGCAGTTTTCGATCTC	M	2	1	2	1	10196	f		218	mosquito (Aedes albopictus)	chr2.107_2425311	chr2.107	2425311	C	A	standard	0.804	recommended
534208158	Affx-1251092941	AX-580813840	GACTTTGTTCATTTGGTTGAATATAGTAAATCTGA[C/T]TTATATTTCCAGCTGTCATCGTTCTCTCCGATGAA	Y	2	1	2	1	10196	f		218	mosquito (Aedes albopictus)	chr3.147_369648	chr3.147	369648	T	C	standard	0.804	recommended
533564631	Affx-1250834609	AX-580182524	CACGAATTCTAAGAACAATATTTGGGAATATGAAA[A/G]ATGTATCATTCCTCCAAAGACAAATGAACAAACCT	R	2	1	2	1	10196	r		218	mosquito (Aedes albopictus)	chr2.87_34230155	chr2.87	34230155	A	G	standard	0.804	recommended
533480744	Affx-1250793912	AX-580098706	GAGTGCTATCGTGAAAGAAAAGTGACTATAGGAAT[A/C]GCAAATGTTCCGACTACGGATGGTATTGTTTCGTT	M	2	1	2	1	10196	f		218	mosquito (Aedes albopictus)	chr2.87_18311467	chr2.87	18311467	C	A	standard	0.804	recommended
533621706	Affx-1250862071	AX-580239341	TTCCAGCCACCGAAAGGAAAATATGAGTCGGCAAT[A/T]GTTACCATAATGCGGTCTACATAACTATAAGCTTA	W	4	1	2	1	10196	f		218	mosquito (Aedes albopictus)	chr2.97_3895093	chr2.97	3895093	A	T	standard	0.804	recommended
538867999	Affx-1250397363	AX-585421243	GCCGGTGGTAGTTGACTGTGACCTAGTAAAGTCTG[A/G]TGACTTGCGAACGATTTACGATTGGTTGGAAGGCT	R	2	1	2	1	10196	r		218	mosquito (Aedes albopictus)	chr2.196_9091475	chr2.196	9091475	G	A	standard	0.804	recommended
536995121	Affx-1249505329	AX-583559812	TCCTCGACGGTGAAGTCACGAAGCAAACAACCAGT[A/G]CTAGTAAATATTGCTCATTGCTGTCCCAAGAAGAA	R	2	1	2	1	10196	r		218	mosquito (Aedes albopictus)	chr1.170_506041	chr1.170	506041	A	G	standard	0.804	recommended
536636471	Affx-1249326210	AX-583202200	ACACATAGACTGGGCGACTGGATGTTTGTACAGTT[G/T]TGTAAGAAGCTAGAACTAGGTGTATAGATGTTAAG	K	2	1	2	1	10196	r		218	mosquito (Aedes albopictus)	chr1.124_434042	chr1.124	434042	T	G	standard	0.804	recommended
538015361	Affx-1250059679	AX-584576116	GCGACTACTAACACAGAAAACTACCAAGTTTTCTC[C/T]TCCCCATCGCTAACGGGGGCGTGTTGTCTGAGAGC	Y	2	1	2	1	10196	f		218	mosquito (Aedes albopictus)	chr2.140_24066850	chr2.140	24066850	T	C	standard	0.804	recommended
535949701	Affx-1248983366	AX-582517247	TGATTCTGTATACTGAGTGTGTACTATAAAAGCAA[C/T]TCTTTCTCGCTTGTTGCTAGTGGACACAAACGCGA	Y	2	1	2	1	10196	f		218	mosquito (Aedes albopictus)	chr2.17_27336994	chr2.17	27336994	T	C	standard	0.804	recommended
536087554	Affx-1249052449	AX-582654809	ATCATGCAGATTGAATGATTAAGCGTAGAAAAACT[A/G]GTTGGGAAATGGATCGATAACGAAACGTTACATAT	R	2	1	2	1	10196	f		218	mosquito (Aedes albopictus)	chr3.74_4976072	chr3.74	4976072	A	G	standard	0.804	recommended
534776525	Affx-1251282207	AX-581366157	CTGCTTTATCGATGTCACACTCAATTATCTTACCT[C/T]AAGTAATTGTCAGCGACCGTGCGTCTCCATGCATG	Y	2	1	2	1	10196	f		218	mosquito (Aedes albopictus)	chr3.176_322714	chr3.176	322714	T	C	standard	0.804	recommended
536592100	Affx-1249303992	AX-583157982	ATAAATTACATAGCATTCTAGGGGAAGGGAGGAGT[C/T]TCTGATTTTGCTACGTGTCATGTATAAGGTATGGG	Y	2	1	2	1	10196	r		218	mosquito (Aedes albopictus)	chr1.115_713769	chr1.115	713769	C	T	standard	0.804	recommended
533423748	Affx-1250765389	AX-580041769	GACATTGCAAGCAGAGCAGTAATCGACTTAATAAA[A/G]AACGAACCTTCGCGGAACGTTGAGGATAGTTCGAC	R	2	1	2	1	10196	f		218	mosquito (Aedes albopictus)	chr2.87_6688035	chr2.87	6688035	G	A	standard	0.804	recommended
537558507	Affx-1249787001	AX-584120749	GACATACTAAACTATGAGAGTAGAAATGTTTGTTG[A/T]ATTATGGCTATTATCAAAAATGAAATTACAATCTA	W	4	1	2	1	10196	r		218	mosquito (Aedes albopictus)	chr1.90_1608603	chr1.90	1608603	T	A	standard	0.804	recommended
533648928	Affx-1250871165	AX-580266221	AACTGTGAGCTTGGCTCTAGAGCATGGTATAAATG[A/G]AATGATTACTTTTTTTGAATGGAAAATGTATCTTT	R	2	1	2	1	10196	f		218	mosquito (Aedes albopictus)	chr2.97_8746672	chr2.97	8746672	G	A	standard	0.804	recommended
538672295	Affx-1250201629	AX-585226103	TTCAATAACGACACAGATATGCGAACTCTTAACGT[A/G]TTATCCTCCTCCATGAGAGGGATCAATTTCACACC	R	2	1	2	1	10196	r		218	mosquito (Aedes albopictus)	chr2.175_8082653	chr2.175	8082653	G	A	standard	0.804	recommended
536621696	Affx-1249318783	AX-583187465	CAGCTGTGTAGTGGTGAGCAACAAGTGAATTTTCG[A/T]TTCGGTTTTATGGAAATAGTTGGAAGAAAACTCAC	W	4	1	2	1	10196	r		218	mosquito (Aedes albopictus)	chr1.120_991275	chr1.120	991275	A	T	standard	0.804	recommended
533735162	Affx-1250903262	AX-580350854	CTCTCTTTGTGGTTAAGCGCTGTAGGCACTCTTTA[C/T]ACTTTCTGAGTTATTACGCCGCTCTTTTTAAGGCT	Y	2	1	2	1	10196	r		218	mosquito (Aedes albopictus)	chr3.1_6304723	chr3.1	6304723	C	T	standard	0.804	recommended
534160209	Affx-1251083514	AX-580770723	CATAAAACTTCCGCATAACATTCCTATCCACGTTT[G/T]GACTTGCTTAAGTTGTTTCTTAATATTAATGCCAA	K	2	1	2	1	10196	r		218	mosquito (Aedes albopictus)	chr3.145_9132433	chr3.145	9132433	G	T	standard	0.804	recommended
533430518	Affx-1250768771	AX-580048536	ACGGTCACTACGATGATAGCCATTACTACTAAGTA[C/T]ACGCTTTACCAAATAGACAACAAAGAAACACTGCC	Y	2	1	2	1	10196	f		218	mosquito (Aedes albopictus)	chr2.87_7795102	chr2.87	7795102	C	T	standard	0.804	recommended
533103704	Affx-1250605344	AX-579721950	TTGCATACCAAAATCTTGTCTACCAACGATCAAAT[C/T]TCCTTCCAGGTTGCGTTCCAGCGCAGCAATCCAAC	Y	2	1	2	1	10196	f		218	mosquito (Aedes albopictus)	chr2.48_9505718	chr2.48	9505718	T	C	standard	0.804	recommended
538236818	Affx-1250281190	AX-584796809	ATTACGATTTGCATGATTGGGAAACTGTCTACCTT[A/T]TCACTGGCATTTCAGTCTAAAACCATATTGTCCCC	W	4	1	2	1	10196	f		218	mosquito (Aedes albopictus)	chr2.186_11118097	chr2.186	11118097	T	A	standard	0.804	recommended
535779134	Affx-1248913948	AX-582352301	GATTGCTAATCACATAAAATATCCTAATGGTAACT[A/T]TGACAGCATTTATATGATGTCCGTCCATTGATTAT	W	4	1	2	1	10196	f		218	mosquito (Aedes albopictus)	chr3.72_2214533	chr3.72	2214533	A	T	standard	0.804	recommended
536121058	Affx-1249069230	AX-582688258	GTCAGAAATTAAGCTCAAGGCCGATCGGATCAAGT[A/T]CAAGCACGGCTACAATCTGCCGAACATGGAGGATC	W	4	1	2	1	10196	f		218	mosquito (Aedes albopictus)	chr3.75_3493819	chr3.75	3493819	T	A	standard	0.804	recommended
537255667	Affx-1249637506	AX-583819323	CGCAACAAATTAGTCTTCTTTAAACCACCAACCTG[A/T]ACAAACCTGAAATATATCTAGTTAAGTAGTTTTTA	W	4	1	2	1	10196	f		218	mosquito (Aedes albopictus)	chr1.59_2328691	chr1.59	2328691	T	A	standard	0.804	recommended
533626662	Affx-1250863722	AX-580244232	TGTCATTTGTAGTAGATTGAAAGTAAACAAAAATG[G/T]AAGATTTCTCCAAATGCTTCCAAAACTTATAATAT	K	2	1	2	1	10196	f		218	mosquito (Aedes albopictus)	chr2.97_5270782	chr2.97	5270782	G	T	standard	0.804	recommended
533759665	Affx-1250915559	AX-580375278	AATTAAACACCAGAGCGAAGAATGTAGCACTCAAA[A/C]CAAAAAAAATTCGCCAGCGATGACCGCTCGCGCAA	M	2	1	2	1	10196	f		218	mosquito (Aedes albopictus)	chr3.1_10290783	chr3.1	10290783	C	A	standard	0.804	recommended
537256736	Affx-1249635898	AX-583820387	TTGGGCAGCCCGTTTATGGAGCAGAACTCTGCGTA[A/G]TAGTTTTTCCACTTTGATCGAGGCAAACATCGAAA	R	2	1	2	1	10196	r		218	mosquito (Aedes albopictus)	chr1.59_890629	chr1.59	890629	G	A	standard	0.804	recommended
538899361	Affx-1250428735	AX-585452498	GAGGACCGAGAAGAGACCGTAAGGATATTGAATTT[G/T]TGAGTCTAAAAAGTAGTGCTGTTGATTAGTTGGTA	K	2	1	2	1	10196	r		218	mosquito (Aedes albopictus)	chr2.198_5332064	chr2.198	5332064	G	T	standard	0.804	recommended
538899058	Affx-1250428432	AX-585452195	AAGGCTTTAAAAACGTTCCAAGCGTTCGGTGGGGT[A/G]TTGACTTATGAGGATACGGATCCGTCCAAACTGGT	R	2	1	2	1	10196	r		218	mosquito (Aedes albopictus)	chr2.198_5194506	chr2.198	5194506	A	G	standard	0.804	recommended
535910816	Affx-1248967645	AX-582481896	AATTTTACTTGGTAGTCTTATTACCTAGAAATGCA[A/T]TGAAAATTGAGTATGTCTTACAAATTATTTCCCTG	W	4	1	2	1	10196	f		218	mosquito (Aedes albopictus)	chr2.17_20429701	chr2.17	20429701	A	T	standard	0.804	recommended
533607977	Affx-1250855943	AX-580225751	AAAATGGAAACAACAATTATTTACAACTGACTTAT[C/T]GTTTCCACTTCGATGTACTCACCAAAACTGTGATC	Y	2	1	2	1	10196	r		218	mosquito (Aedes albopictus)	chr2.97_1975002	chr2.97	1975002	T	C	standard	0.804	recommended
537578755	Affx-1249799004	AX-584140954	GCTCCAAAAATTATTCATACTAAAGCCAAAGCAAT[C/T]CCTATTAGCCAACACATCGAAGTGGAAAAACCTGT	Y	2	1	2	1	10196	f		218	mosquito (Aedes albopictus)	chr1.90_5230373	chr1.90	5230373	C	T	standard	0.804	recommended
534629148	Affx-1251232576	AX-581223701	TTGCTTCTTCTATTACCATTACCTCATGAAAATGA[A/T]TCGTGAATGACCGCGCGCAATGCCGGTAGTGATGA	W	4	1	2	1	10196	f		218	mosquito (Aedes albopictus)	chr3.170_1118934	chr3.170	1118934	A	T	standard	0.804	recommended
538279342	Affx-1250323720	AX-584839230	AATCTTCAATTGCAAAGTGTCCTCAACATCAGTAA[A/G]CGGAATGGGCCAGGTGAAGAGCCAGTTCAGCGAGG	R	2	1	2	1	10196	f		218	mosquito (Aedes albopictus)	chr2.186_24837778	chr2.186	24837778	G	A	standard	0.804	recommended
538641188	Affx-1250170520	AX-585195088	ATCATTAGCTGGTTATCTCTGTGGCTATTCCCTAT[A/T]ATTATTCGGTTGATACGTGCCGACCAAAATCTGCT	W	4	1	2	1	10196	r		218	mosquito (Aedes albopictus)	chr2.17_5373432	chr2.17	5373432	T	A	standard	0.804	recommended
533236091	Affx-1250670340	AX-579854248	CAGCAGCAGCAGTAGCAGATTCCGGGAATGTTTGA[A/G]TGATTGTCAGCTCGAGCGGCGCTGTAAATAGAGCG	R	2	1	2	1	10196	r		218	mosquito (Aedes albopictus)	chr2.62_4064824	chr2.62	4064824	G	A	standard	0.804	recommended
538059346	Affx-1250103686	AX-584619855	TTCCAGTGAAATTTCAAGATACAGTCGATAAAGTG[C/T]GCTGTTTCTGCCTGGTAGGCAGCACACATTGCGGG	Y	2	1	2	1	10196	f		218	mosquito (Aedes albopictus)	chr2.155_10513302	chr2.155	10513302	C	T	standard	0.804	recommended
534605986	Affx-1251226028	AX-581200878	AAATTCATTTCTCAATGATATACACAACACTGAAC[C/T]CTACAAGCTACCACAATCATCTTGAGGGTTTACAG	Y	2	1	2	1	10198	f		218	mosquito (Aedes albopictus)	chr3.168_7654118	chr3.168	7654118	C	T	standard	0.802	recommended
536327633	Affx-1249171766	AX-582894409	ACGAGAATTCACGCAAAATTTTATTTCAGATTTTT[C/T]TTTCCCTCGAGTGTTAATAATCCGCTTTAAGTTAC	Y	2	1	2	1	10198	r		218	mosquito (Aedes albopictus)	chr3.78_251806	chr3.78	251806	T	C	standard	0.802	recommended
537047722	Affx-1249533307	AX-583612240	AATCGTTATTCTATTTCACTTCACCGAAATCTGCT[A/T]CTTCCCTCTGTTTATCGGAAACGGAAGGCTGAAAA	W	4	1	2	1	10198	f		218	mosquito (Aedes albopictus)	chr1.25_6178229	chr1.25	6178229	A	T	standard	0.802	recommended
536924310	Affx-1249471377	AX-583489241	TTTCTCTTCGGACGGTTCTTTTTTGATCGAAAGTG[A/T]CTCATCGGTGCCTTTGGCTTTGATGGACACCTCCG	W	4	1	2	1	10198	f		218	mosquito (Aedes albopictus)	chr1.149_6745361	chr1.149	6745361	T	A	standard	0.802	recommended
537518088	Affx-1249768633	AX-584080464	ATCTTTGTTTCTATCCAACTATAAGCAATCAAACC[A/G]ACTTCATACGAGACGGAGTGGGTGTGTTGTTCTGC	R	2	1	2	1	10198	f		218	mosquito (Aedes albopictus)	chr1.85_24378829	chr1.85	24378829	A	G	standard	0.802	recommended
538906472	Affx-1250435848	AX-585459548	TTGGTTAAAAATTAGAAAAATTGAGGTTACGATAC[A/C]GTACTTCACATAACGAAGATCACAAATTACGATGT	M	2	1	2	1	10198	r		218	mosquito (Aedes albopictus)	chr2.205_252201	chr2.205	252201	A	C	standard	0.802	recommended
532834372	Affx-1250470510	AX-579452728	CTCTCGCTGTTCCTTTCATAGTGGATGTAAAAATC[C/T]AAATCCGAATCACGGAACGCCAGCCCGGATTTGAT	Y	2	1	2	1	10198	f		218	mosquito (Aedes albopictus)	chr2.22_2233772	chr2.22	2233772	C	T	standard	0.802	recommended
537746882	Affx-1249882706	AX-584308490	AAATAATACAAAAGCAAAGTATAAAGGTGTGCAAT[A/C]GTGTTTCAAGTGTTAAAAGGATAATGGAGCATATT	M	2	1	2	1	10198	f		218	mosquito (Aedes albopictus)	chr2.102_1076289	chr2.102	1076289	C	A	standard	0.802	recommended
534304002	Affx-1251132510	AX-580907198	GACCACCGAGGTCCCTCCTCCTCCTCCGGGCTCGA[A/G]TCGTTTATCCACCTCCAAAATATAATAAAAACATG	R	2	1	2	1	10198	r		218	mosquito (Aedes albopictus)	chr3.159_2133719	chr3.159	2133719	G	A	standard	0.802	recommended
533513588	Affx-1250810213	AX-580131532	CCACCCATCATTCATGAAAAGGTAAGGAATAAGTA[A/G]AAAGGAGGAAAAGTTCTTCCACAAAGAAAAACACC	R	2	1	2	1	10198	f		218	mosquito (Aedes albopictus)	chr2.87_23976382	chr2.87	23976382	G	A	standard	0.802	recommended
536318588	Affx-1249168134	AX-582885394	TCTGGATTCGCTTATGTAAAGTAGATATGATTCAA[C/G]CGGATGACATTTGATAGAATCTGAGTAGCTTATAC	S	4	1	2	1	10198	f		218	mosquito (Aedes albopictus)	chr3.77_18614590	chr3.77	18614590	C	G	standard	0.802	recommended
536386826	Affx-1249202410	AX-582953360	TAAATCGATGGAAGGTTTGATAACATCTGAGTGAA[A/T]TCAACAGAGAGGCAATGATGCTTTTGATACGATCA	W	4	1	2	1	10198	f		218	mosquito (Aedes albopictus)	chr3.9_2758178	chr3.9	2758178	A	T	standard	0.802	recommended
537575795	Affx-1249795625	AX-584138001	CATTTGATTAACAAGATAAAAAGGGTACACTTTAT[C/T]AAAAGTGACAATCGTAAAATCGGAAGGTTGACACA	Y	2	1	2	1	10198	r		218	mosquito (Aedes albopictus)	chr1.90_4122986	chr1.90	4122986	T	C	standard	0.802	recommended
538044220	Affx-1250088558	AX-584604786	AAATACATAATTTTCTCGTTAAATTTTACGAACTA[A/G]AAGTACCGCATCCCACAACACTCCGACGACAACGA	R	2	1	2	1	10198	f		218	mosquito (Aedes albopictus)	chr2.155_3206034	chr2.155	3206034	G	A	standard	0.802	recommended
533447657	Affx-1250777329	AX-580065651	TCATCCAGGAAATCCGAATGAAAAGCAGTCAAAAT[G/T]TATTACAAATCTTCTCGGGATTCCTCTAGACTTAG	K	2	1	2	1	10198	f		218	mosquito (Aedes albopictus)	chr2.87_11054801	chr2.87	11054801	T	G	standard	0.802	recommended
536119351	Affx-1249068391	AX-582686555	TCGTTTTAGCTTAAAATAGATCGGAAACCAATGAC[A/C]GGAGTTGCCCATTCAAATCTGCCATCGCTAGATGT	M	2	1	2	1	10198	f		218	mosquito (Aedes albopictus)	chr3.75_3289776	chr3.75	3289776	C	A	standard	0.802	recommended
538115645	Affx-1250160003	AX-584675930	ATAAAAGATAAGATGGAATGAAGTGAATTTACTTA[C/T]GATGATCATCTCTTTTAGATTAAAGCTGAATGTCC	Y	2	1	2	1	10198	f		218	mosquito (Aedes albopictus)	chr2.17_1547453	chr2.17	1547453	T	C	standard	0.802	recommended
537427274	Affx-1249721321	AX-583989933	CTAAGATCCCATCTAAGCTCGTAGGTACCAACTAC[C/T]GTCGTTTATCTCCAATTTATCTACAAACATTGGGC	Y	2	1	2	1	10198	r		218	mosquito (Aedes albopictus)	chr1.85_2392216	chr1.85	2392216	C	T	standard	0.802	recommended
534202136	Affx-1251090407	AX-580807976	ATACCCACATTTCTTTTGACGAATTCTCAACTAAC[A/G]TCCCGTCCAATTTTCACCTTTCTCTCACCCGCAGA	R	2	1	2	1	10198	f		218	mosquito (Aedes albopictus)	chr3.146_1341143	chr3.146	1341143	G	A	standard	0.802	recommended
535658901	Affx-1248872074	AX-582236904	AACAGAAACTTATGTCTCTTATGCATTCTATTCAT[C/G]TGTTTCTAGGACTACCTACTAATATCATACGATTA	S	4	1	2	1	10198	r		218	mosquito (Aedes albopictus)	chr3.7_79516	chr3.7	79516	C	G	standard	0.802	recommended
533300353	Affx-1250702396	AX-579918457	AATTCCACAGCACAGTTCATCAGACTTAGTATTAT[A/T]GACTTAAATTAGTTGGCAACACTAGCAGTCACGTT	W	4	1	2	1	10198	r		218	mosquito (Aedes albopictus)	chr2.82_2867113	chr2.82	2867113	A	T	standard	0.802	recommended
538284753	Affx-1250329131	AX-584844634	ACACAATGACTTGCAACATTTATCCAATACACATC[G/T]ACTCCATCTAAGTTTGTGTTTGTCCTCCAAAAAGA	K	2	1	2	1	10198	f		218	mosquito (Aedes albopictus)	chr2.186_26432031	chr2.186	26432031	T	G	standard	0.802	recommended
534988681	Affx-1251361034	AX-581575719	GAAATAATGGCACTTATCAGCTGTAATTAAAAGCA[A/T]TCTATATTGTAGATTATCAAAACATGCAACTATCT	W	4	1	2	1	10198	f		218	mosquito (Aedes albopictus)	chr3.20_5241818	chr3.20	5241818	T	A	standard	0.802	recommended
535033307	Affx-1251378993	AX-581620052	CGTGAGAAGAGACGCTTAGAGTTGCTAAGAAGAGG[C/T]TATAGGTATCCATATTCAGCATCTATTTACCCAAC	Y	2	1	2	1	10198	r		218	mosquito (Aedes albopictus)	chr3.20_11571933	chr3.20	11571933	C	T	standard	0.802	recommended
533055849	Affx-1250581248	AX-579674118	CTTTGAACCTATACTAAACTCACATTGATGCAAAC[A/G]TCGAAGCCTCCTTCCCACAACCTCCCGAAGTGGTG	R	2	1	2	1	10198	f		218	mosquito (Aedes albopictus)	chr2.42_12243716	chr2.42	12243716	A	G	standard	0.802	recommended
536528950	Affx-1249272441	AX-583095059	AGTCAAAACTCAATATTCATATTCAACCAACTTTT[C/T]GTATATATTTACAGGAAGATCGTTCCTTCACCATC	Y	2	1	2	1	10198	r		218	mosquito (Aedes albopictus)	chr1.102_2447093	chr1.102	2447093	T	C	standard	0.802	recommended
536315076	Affx-1249166370	AX-582881888	GACACACAATTTAGTTGGTTTACAAAAATAACAGA[A/C]AAAAATGGTATACTATATTTGTTTCAAATATCAAT	M	2	1	2	1	10198	f		218	mosquito (Aedes albopictus)	chr3.77_17586561	chr3.77	17586561	C	A	standard	0.802	recommended
536876932	Affx-1249446399	AX-583441988	TGGAATACGCAGGCGTGAGGAATACTAGCTTTAAG[A/T]TAGGATTTAGATAGAGGAGAAAATTTAGATACAAT	W	4	1	2	1	10198	r		218	mosquito (Aedes albopictus)	chr1.147_7129054	chr1.147	7129054	A	T	standard	0.802	recommended
536954245	Affx-1249486324	AX-583519087	GGGCGGATCTGTTCAGAGGAGATGTGTTAGGATCA[A/T]TGTAGAATTGCTGGATCTACTGAGATAACTCACAT	W	4	1	2	1	10198	f		218	mosquito (Aedes albopictus)	chr1.152_4524338	chr1.152	4524338	A	T	standard	0.802	recommended
532872012	Affx-1250488711	AX-579490341	CAAACATCACATTTTTCTACTACATTGCGCTATCA[C/T]TTAACTTTCACTACACTATTGGCTGCTTATTGTAA	Y	2	1	2	1	10198	r		218	mosquito (Aedes albopictus)	chr2.22_8853475	chr2.22	8853475	C	T	standard	0.802	recommended
534294695	Affx-1251128336	AX-580897979	TAATTACTTTTCAGTTTGTTTTTTTCTTTTCTCTT[C/T]TCTTTTATATGGATTTGCTCGTCAGTTTCCAGTTT	Y	2	1	2	1	10198	r		218	mosquito (Aedes albopictus)	chr3.159_892009	chr3.159	892009	C	T	standard	0.802	recommended
538226346	Affx-1250270717	AX-584786356	TACTTTTAATTCTGATTCAACTGTAACTGGAAAAT[A/G]ATATCTCTTCCTACTCGGCCAGCCTGCAGCGGCTC	R	2	1	2	1	10198	f		218	mosquito (Aedes albopictus)	chr2.186_7244287	chr2.186	7244287	G	A	standard	0.802	recommended
537747464	Affx-1249881848	AX-584309068	ACCTCTCAGTAGTTCTTTTCTATATCATGTTTTCT[A/T]TCAGCCTTAAACATGACAGGATTCGAAATTCACAA	W	4	1	2	1	10198	r		218	mosquito (Aedes albopictus)	chr2.102_725980	chr2.102	725980	A	T	standard	0.802	recommended
537433529	Affx-1249724425	AX-583996164	ACTGTTGTGTGTATGTTCCATGCCGGTGGATTCGA[A/G]GATTTATTGCTGCAAGTGTTGACCTAAGAATACAC	R	2	1	2	1	10198	r		218	mosquito (Aedes albopictus)	chr1.85_4322183	chr1.85	4322183	A	G	standard	0.802	recommended
537542083	Affx-1249780630	AX-584104387	ATGGTTATACAGTCTATCTCAAAGACCACAATCAC[G/T]ATATTTCCGGCAAATCTTGGGGAGGCGGTGTCTTC	K	2	1	2	1	10198	f		218	mosquito (Aedes albopictus)	chr1.90_178048	chr1.90	178048	G	T	standard	0.802	recommended
538844540	Affx-1250373898	AX-585397860	TGAGAAAACTCACGGTCATCTTCTAGCTCAGTTTT[C/G]ACAATACAAATCACTTAAAAATTCCGATATTTTGA	S	4	1	2	1	10198	r		218	mosquito (Aedes albopictus)	chr2.192_229994	chr2.192	229994	C	G	standard	0.802	recommended
537225756	Affx-1249622496	AX-583789533	GCATTTTGTGAGTTACTAAAAGCAACGGTAACGAT[C/T]CGTATTTGTTCTGTAACAGTAAGGTTGAGAGTCCC	Y	2	1	2	1	10198	f		218	mosquito (Aedes albopictus)	chr1.50_12265459	chr1.50	12265459	C	T	standard	0.802	recommended
538675537	Affx-1250204871	AX-585229335	GCTCGCTCTTCTGCTTCTTCCAGTTCCTGCTGAGC[C/T]TTGCGGAATTTAGCGAGATTTAATGCGGCAATTTC	Y	2	1	2	1	10198	r		218	mosquito (Aedes albopictus)	chr2.175_9110846	chr2.175	9110846	C	T	standard	0.802	recommended
537747789	Affx-1249883165	AX-584309391	GAAGGAACTGTATATAGTGCACCTGAATCAGAAAT[C/T]CGAAACCAACTAAAATGCAAACATGGATTAGATCA	Y	2	1	2	1	10198	f		218	mosquito (Aedes albopictus)	chr2.102_1394651	chr2.102	1394651	T	C	standard	0.802	recommended
537810056	Affx-1249913168	AX-584371537	TAAACCTCTAAACACAATTTCATATAACGCATCTT[G/T]TGACTATATGTATACCTTCTTTGTATAGCAGTAGT	K	2	1	2	1	10198	r		218	mosquito (Aedes albopictus)	chr2.103_8139700	chr2.103	8139700	G	T	standard	0.802	recommended
536561334	Affx-1249288626	AX-583127326	GTTAAAATATGTTTTTATACATATTTCGATAGTTC[A/T]ATTGCGTTACATAAATTTAATCAAATGCGACAATA	W	4	1	2	1	10198	r		218	mosquito (Aedes albopictus)	chr1.113_112290	chr1.113	112290	A	T	standard	0.802	recommended
533595180	Affx-1250850904	AX-580213019	CCTAATAATCTTTCCGAAAGAGAATCTGATCAAAA[A/G]CAGAAATCTATTTTTTTCACGCGCTAGGCATTCTT	R	2	1	2	1	10198	f		218	mosquito (Aedes albopictus)	chr2.96_492338	chr2.96	492338	G	A	standard	0.802	recommended
536140278	Affx-1249078808	AX-582707429	CCTGTTCCAAACCTGATTGGTTAAAATAGGAAATC[A/G]TCTTTCAAAACACTCAGCACTAAAAAAGACAATCG	R	2	1	2	1	10198	f		218	mosquito (Aedes albopictus)	chr3.75_6717953	chr3.75	6717953	G	A	standard	0.802	recommended
536955337	Affx-1249485554	AX-583520174	CAATCTGTGATCGCGAACGGCTGCTTTCAAATTTT[C/T]TGTCATTCGTTATTTCGTCTCCACGTGCTTGCCAA	Y	2	1	2	1	10198	r		218	mosquito (Aedes albopictus)	chr1.152_4390781	chr1.152	4390781	C	T	standard	0.802	recommended
536336936	Affx-1249177432	AX-582903674	TTTTTCAGTTACGTCAAGCGATTAATTGAAGATAC[A/C]AACATTGGCGAAGAAGGAGTGAAACTGTTACAGTA	M	2	1	2	1	10198	f		218	mosquito (Aedes albopictus)	chr3.78_2381799	chr3.78	2381799	C	A	standard	0.802	recommended
533067212	Affx-1250586188	AX-579685475	AAACCTTTGTGTGGTGTGCGCTGCAATGCGGCTTT[C/T]GAATTGTTTAGCGTATTAGGTGGATTATGAGGAAA	Y	2	1	2	1	10198	r		218	mosquito (Aedes albopictus)	chr2.42_14732119	chr2.42	14732119	T	C	standard	0.802	recommended
536270464	Affx-1249144073	AX-582837346	ATGGGTTTACTTCATACTCAACCATTTATCCTAAA[A/C]CATAGATTTAGCTGCATTATGCATCTACGTTATGT	M	2	1	2	1	10198	f		218	mosquito (Aedes albopictus)	chr3.77_7923167	chr3.77	7923167	C	A	standard	0.802	recommended
533908542	Affx-1250972499	AX-580521621	CCACCACCCATCTTACTCATAACGTTTAGGAACAT[A/T]TCTGAAGAAAATCAAAGAACAAAATTTAGGGTGGA	W	4	1	2	1	10198	f		218	mosquito (Aedes albopictus)	chr3.119_263688	chr3.119	263688	A	T	standard	0.802	recommended
533277469	Affx-1250692248	AX-579895608	TTCGGCAACATCCGGTGCCTTAAAATTCTGACCAT[C/T]CAATAGGCTCCCTTACCCCCATGTGCTTCGGTGGA	Y	2	1	2	1	10198	f		218	mosquito (Aedes albopictus)	chr2.68_4878542	chr2.68	4878542	C	T	standard	0.802	recommended
533824276	Affx-1250939727	AX-580439128	TTCTGTCTTATCTTAATTGTTATATTGAGCAAATT[A/C]ATGTGTATTTGTATGTAACGTAAAAGTGCTATGCT	M	2	1	2	1	10198	r		218	mosquito (Aedes albopictus)	chr3.109_5988748	chr3.109	5988748	A	C	standard	0.802	recommended
536644228	Affx-1249331116	AX-583209944	TCGACTAACTTTTATGTGGTTGCATATTTTACAAA[A/G]CGAATTGCACTTTGCTAGGCAGTTACAATGGCAAC	R	2	1	2	1	10198	f		218	mosquito (Aedes albopictus)	chr1.124_2932267	chr1.124	2932267	A	G	standard	0.802	recommended
534983001	Affx-1251359092	AX-581570060	GCGAGCGCGAGTAGTGTGGGAGTCACTGTTTGCTT[A/G]ATTAGGAAATAAGGTGCGAAAACGAATGGTTGGAA	R	2	1	2	1	10198	r		218	mosquito (Aedes albopictus)	chr3.20_4499329	chr3.20	4499329	G	A	standard	0.802	recommended
536357665	Affx-1249187831	AX-582924304	GCATTTTGAAAACTAGCTAATTTGAAGTACAGTAG[A/G]TAAATAAATATATTAAGTTGACGGTAGAGTGATGA	R	2	1	2	1	10198	f		218	mosquito (Aedes albopictus)	chr3.82_2263004	chr3.82	2263004	G	A	standard	0.802	recommended
532986428	Affx-1250545824	AX-579604723	CATTCTGGCTTTACGTTCCAACGGGTCAAAGCTAA[C/T]TTCTTAGCATTGGAACAGGCTCTACCTTTCCACTG	Y	2	1	2	1	10198	r		218	mosquito (Aedes albopictus)	chr2.38_3746351	chr2.38	3746351	C	T	standard	0.802	recommended
537502716	Affx-1249760957	AX-584065114	CCGGTTCACACTTGTTCACGAACAGGTTCCCAATA[G/T]CATCGGTGGGTCTCGATTCGCGATCTCGTCTAATA	K	2	1	2	1	10198	f		218	mosquito (Aedes albopictus)	chr1.85_22029151	chr1.85	22029151	T	G	standard	0.802	recommended
536863673	Affx-1249441007	AX-583428748	CAAATCGCATATAAAATCGACGAGGTGCATGATGA[C/T]GTACTGGACATTGCCGATATGTCACCAACTTGGAT	Y	2	1	2	1	10198	f		218	mosquito (Aedes albopictus)	chr1.147_5407672	chr1.147	5407672	C	T	standard	0.802	recommended
537750873	Affx-1249883561	AX-584312461	TCCACTTCAGGATTCGATCTTAAATATAAAACGTA[C/T]GCATTATTAGATATATAAACATTGATGGTGTAACT	Y	2	1	2	1	10198	r		218	mosquito (Aedes albopictus)	chr2.102_1662494	chr2.102	1662494	T	C	standard	0.802	recommended
533794377	Affx-1250928966	AX-580409251	CCGATAATGATTCCGGTTGATTTCTTTCTTTTTGT[A/T]ATCATAATTGCTCATTTCTATCAAAACAAGCAGGT	W	4	1	2	1	10198	r		218	mosquito (Aedes albopictus)	chr3.109_2666501	chr3.109	2666501	A	T	standard	0.802	recommended
537167159	Affx-1249591145	AX-583731208	TTCATCGCTGCTGGCTGGCTGCAGCCAGGACGGTT[A/G]AGTTTTGAGTTATTTACGGCTGACGGCCAATTTGT	R	2	1	2	1	10198	r		218	mosquito (Aedes albopictus)	chr1.41_7681986	chr1.41	7681986	G	A	standard	0.802	recommended
537176126	Affx-1249597651	AX-583740147	TCAATTGCACTTGAAACGATACAAGCAAATCAATC[A/G]AAATCTGCGGGAGTCTGCAAACGCAGACCGCACGA	R	2	1	2	1	10198	f		218	mosquito (Aedes albopictus)	chr1.45_862159	chr1.45	862159	G	A	standard	0.802	recommended
537860416	Affx-1249939493	AX-584421731	ACCATTGACGTTCAAAGCTATTTATCGAAAGAATC[C/T]GAAAGTAAAGAAAACTCCCAGTTAGAGGAAGCGAT	Y	2	1	2	1	10198	f		218	mosquito (Aedes albopictus)	chr2.107_7467431	chr2.107	7467431	C	T	standard	0.802	recommended
536593178	Affx-1249304530	AX-583159050	GCGGAAGATTTGTATAAGAGTATTATGACGATTAT[A/T]TGATTCTTTTCAGGGACAAGATCGCGACAAGGACA	W	4	1	2	1	10198	r		218	mosquito (Aedes albopictus)	chr1.116_171328	chr1.116	171328	A	T	standard	0.802	recommended
536191094	Affx-1249104183	AX-582758153	TGGAAATGACGATAGGATTCGGCTAACTTTGTAAC[A/G]GTCACATCGTTTTTCATTGCATTGTAGAACAGGTA	R	2	1	2	1	10198	f		218	mosquito (Aedes albopictus)	chr3.75_15590919	chr3.75	15590919	G	A	standard	0.802	recommended
537003008	Affx-1249510852	AX-583567696	CATAAAATCCATACGGAGCGAGTGGGTTCATAAAA[A/G]TCTTTATATGTGATACCCTCGGCGCGCGGACTGTG	R	2	1	2	1	10198	f		218	mosquito (Aedes albopictus)	chr1.170_1617071	chr1.170	1617071	A	G	standard	0.802	recommended
536323064	Affx-1249169543	AX-582889858	TGAAAGATGCGTGATGACATATTTGTATGAGATTA[A/T]GATAACTTAGAAGTAATTGTAAAAGATAGTTAAGT	W	4	1	2	1	10198	r		218	mosquito (Aedes albopictus)	chr3.77_19789874	chr3.77	19789874	A	T	standard	0.802	recommended
533331366	Affx-1250717881	AX-579949450	GGGAAAACATAAAATATTTGCGACTTAGTCGAATG[C/T]TTCAGTATTTGTCAGCTCGTATGTTCACATTAAAA	Y	2	1	2	1	10198	r		218	mosquito (Aedes albopictus)	chr2.82_11600768	chr2.82	11600768	T	C	standard	0.802	recommended
533332769	Affx-1250718594	AX-579950853	TAGAGATCGCTACCTTTTGATGTTGCAAATGAGAG[A/T]TGGTTTCTTAATAACCTGCAATGTACACTACGAGT	W	4	1	2	1	10198	r		218	mosquito (Aedes albopictus)	chr2.82_11891327	chr2.82	11891327	T	A	standard	0.802	recommended
534236564	Affx-1251102883	AX-580841542	TTCGAGAGTTTTAAAAGCGACATAGATCTGCAAAT[A/T]ACTGGTAAGAAGCTAAATTAAAACTGAAATCGCAA	W	4	1	2	1	10198	f		218	mosquito (Aedes albopictus)	chr3.151_3403042	chr3.151	3403042	T	A	standard	0.802	recommended
536543779	Affx-1249280887	AX-583109857	TATATCTTTGTATTAAAATAGCTTTCTATCAGTCA[A/T]ATCACTTTCGAATAGCGTAGTATCAACATGCACAC	W	4	1	2	1	10198	f		218	mosquito (Aedes albopictus)	chr1.106_2551719	chr1.106	2551719	T	A	standard	0.802	recommended
536598445	Affx-1249307164	AX-583164288	TACTCACTTTTGTATCTTAACAGGTATCCGCCTTT[A/T]ATCTGCTTGCCGACTGATGCTGAAATGAGAATGGA	W	4	1	2	1	10198	r		218	mosquito (Aedes albopictus)	chr1.116_1224380	chr1.116	1224380	T	A	standard	0.802	recommended
532968679	Affx-1250537686	AX-579586976	GGAACCAAAACACTTTAATCCTCAGCGATGATGAA[G/T]GCGATTCCAAAGGTTACTGCTGCTGCTGGACAAGA	K	2	1	2	1	10198	f		218	mosquito (Aedes albopictus)	chr2.36_7786478	chr2.36	7786478	G	T	standard	0.802	recommended
537489497	Affx-1249752460	AX-584051943	AAAAATCTGCAAATTTATGCCAGTATCAAACTGAT[A/C]GATGTTTTCCTATTTTACGGTATATGCACTCAAAT	M	2	1	2	1	10198	r		218	mosquito (Aedes albopictus)	chr1.85_18889346	chr1.85	18889346	C	A	standard	0.802	recommended
534795344	Affx-1251289516	AX-581384714	TTAATAACTGAATTGACTACCAAAAGGCAAACGCC[A/C]ATTCTGCATTTCGTATCATTTACCCTAATGGTGTA	M	2	1	2	1	10198	r		218	mosquito (Aedes albopictus)	chr3.178_2041276	chr3.178	2041276	A	C	standard	0.802	recommended
535897810	Affx-1248961313	AX-582468951	CAAAAACATAGATTTTAGTTCTAGTGTAAATACTA[C/T]TGTAGGAGGAAGTTTGTCCATCGTTTGTTACACAT	Y	2	1	2	1	10198	f		218	mosquito (Aedes albopictus)	chr2.17_17480618	chr2.17	17480618	T	C	standard	0.802	recommended
537229357	Affx-1249622232	AX-583793127	GTTCAAATATCGAACAACTCGGGATCCACTTCACT[A/G]GCTTAATCCAATTAGTTTAACACTTTCGCTTTCAA	R	2	1	2	1	10198	r		218	mosquito (Aedes albopictus)	chr1.50_12081274	chr1.50	12081274	G	A	standard	0.802	recommended
533665046	Affx-1250876396	AX-580282124	GTGGTCTAATTTGGGTAAAAGCTGTCGAATTTAGT[A/C]ATTTTAGGAATTCACAACGCCAATTGAAGAATTCT	M	2	1	2	1	10198	r		218	mosquito (Aedes albopictus)	chr2.97_10799008	chr2.97	10799008	A	C	standard	0.802	recommended
536561677	Affx-1249289844	AX-583127668	TGTTTTGTACTTGTATACAAGATCTATAGAACGCA[A/T]TGAAACTCAAGAGCATATACTGTAAAAGTATTGCC	W	4	1	2	1	10198	f		218	mosquito (Aedes albopictus)	chr1.113_477007	chr1.113	477007	A	T	standard	0.802	recommended
538068341	Affx-1250112686	AX-584628816	ATACTTGTGCGTAATCGTACAGTATTTGGGTGGAA[A/T]CCTAGCTTGACCGTTTATCAGATGAGTTTCTTGTT	W	4	1	2	1	10198	f		218	mosquito (Aedes albopictus)	chr2.155_16674903	chr2.155	16674903	A	T	standard	0.802	recommended
537768701	Affx-1249892424	AX-584330246	TCTATATGGCTAAGTAGAAGCTGCTATTGCTAATG[G/T]TCTATATCGCTTCATACTAGTTTTCCTCTAGCGTG	K	2	1	2	1	10198	r		218	mosquito (Aedes albopictus)	chr2.103_2231260	chr2.103	2231260	T	G	standard	0.802	recommended
536302436	Affx-1249160086	AX-582869271	TGGCTTTTCTATTCATGGAAAAGGTTATCCATCTA[A/T]TTCTACCCTATCAGCATGCTGGAGAACGCCTACAC	W	4	1	2	1	10198	f		218	mosquito (Aedes albopictus)	chr3.77_15338654	chr3.77	15338654	T	A	standard	0.802	recommended
535739198	Affx-1248901941	AX-582316283	AACTGTTTATAAGTGTTTCAAACGGATAGTTTAGC[A/G]TAGTTCAACATTTCCGTACCACTTTTTGTTCTTCA	R	2	1	2	1	10198	r		218	mosquito (Aedes albopictus)	chr3.70_2007963	chr3.70	2007963	G	A	standard	0.802	recommended
536012279	Affx-1249014692	AX-582579707	ACTAAAAACTGCTAAGCTGTGGGAACTGTTTCAGA[G/T]ACTCTATTTTATAGCTGTCAATTAAAAGCATAAGG	K	2	1	2	1	10198	f		218	mosquito (Aedes albopictus)	chr2.17_39615014	chr2.17	39615014	G	T	standard	0.802	recommended
533436031	Affx-1250771517	AX-580054038	AAATCCTGGGCAAAAAGAGCCATTGTAGAAAGTAA[G/T]GCGATAACTTTACTACTCGTAGCAATACCCAGCTC	K	2	1	2	1	10198	f		218	mosquito (Aedes albopictus)	chr2.87_8855902	chr2.87	8855902	T	G	standard	0.802	recommended
537625962	Affx-1249822360	AX-584188040	GCCGAATCACTTTAGATTATGTATATTAGTTAGTG[A/C]AAAACCTCTCCATCACGCTGGAAGTTGTGCTTTGA	M	2	1	2	1	10198	f		218	mosquito (Aedes albopictus)	chr1.90_12734786	chr1.90	12734786	A	C	standard	0.802	recommended
536367651	Affx-1249191740	AX-582934265	ATTAGTGAGGGATTCCTGAAACTTTTGCTTTGTAG[A/G]ATTTTTAACGGTGTTTAAAACTATGAAAGAGTTCA	R	2	1	2	1	10198	r		218	mosquito (Aedes albopictus)	chr3.82_3533112	chr3.82	3533112	G	A	standard	0.802	recommended
537452489	Affx-1249733919	AX-584015044	TTACCTTTTCTTGCCATAAGTGTCATACAATCGTA[C/T]ATTTCTTGCGACGATGCCCATCTTGAGATTAATAT	Y	2	1	2	1	10198	r		218	mosquito (Aedes albopictus)	chr1.85_10877309	chr1.85	10877309	C	T	standard	0.802	recommended
537183894	Affx-1249599562	AX-583747832	TCTTTGTCGTCTTACATACGACTCATCAAGAGCTG[C/T]AAATGCTGACATATTAGATCTGATGAGGAATTAGC	Y	2	1	2	1	10198	r		218	mosquito (Aedes albopictus)	chr1.5_195615	chr1.5	195615	C	T	standard	0.802	recommended
537998914	Affx-1250043229	AX-584559732	TTTCGATGCAGTTAAAACTATCATGAAAGTGATAA[A/T]CAAGCTGCCTTGCAGAAAAAGAAAACTGTAAAAAT	W	4	1	2	1	10198	f		218	mosquito (Aedes albopictus)	chr2.140_15465882	chr2.140	15465882	T	A	standard	0.802	recommended
536453010	Affx-1249234518	AX-583019364	ACAGTAATTGTTTTATGCGCCATTGTTCTTGTTTT[G/T]TGTATTATCCGCGGTGTTGTTACTTCTTTTTCATC	K	2	1	2	1	10198	r		218	mosquito (Aedes albopictus)	chr3.95_3420060	chr3.95	3420060	G	T	standard	0.802	recommended
536093639	Affx-1249054990	AX-582660889	AGGCATATGAACAAAAACAAAAAGAAAGAAGAAGA[A/G]CTCATTTTAATTACGGTGGCCATTCACCTGTGCTG	R	2	1	2	1	10198	r		218	mosquito (Aedes albopictus)	chr3.74_5492169	chr3.74	5492169	A	G	standard	0.802	recommended
535013089	Affx-1251370725	AX-581599984	TGATTTGAACTTTACGGTAATTGAATGAGCAGCAA[A/T]TACTCATAAAAATGTGATATAAAAAGTTGAATGGA	W	4	1	2	1	10198	f		218	mosquito (Aedes albopictus)	chr3.20_9257149	chr3.20	9257149	A	T	standard	0.802	recommended
536524797	Affx-1249271396	AX-583090915	ATGGCGTACGATCCTACAATAAATGAGAGGATCAA[C/T]CCATTTGATAAAGATAAGATAGCGGCTAGCCGAGC	Y	2	1	2	1	10198	f		218	mosquito (Aedes albopictus)	chr1.102_2105832	chr1.102	2105832	T	C	standard	0.802	recommended
536018645	Affx-1249017582	AX-582586045	AAATCCAGGTTTAAACTTGACTCAATAACGCTTTC[A/T]ATGATGATGTTCCTGTTATACGACCATTCAAATGG	W	4	1	2	1	10198	r		218	mosquito (Aedes albopictus)	chr2.17_41932337	chr2.17	41932337	A	T	standard	0.802	recommended
538533600	Affx-1250062890	AX-585088029	CATGAATTTTGATATGCCAGGCTTTCTGATATTTT[C/T]CAATTTGATTCCCTTAACATCTGTGTTGAGCATTA	Y	2	1	2	1	10198	r		218	mosquito (Aedes albopictus)	chr2.141_130250	chr2.141	130250	T	C	standard	0.802	recommended
536195902	Affx-1249106601	AX-582762944	TAGCATGGTTACATTGGTTATGATATGATGCAATC[A/G]AAAACCATATTCGAAGCTATGATGCAGCCAAAAGC	R	2	1	2	1	10198	f		218	mosquito (Aedes albopictus)	chr3.75_16789329	chr3.75	16789329	A	G	standard	0.802	recommended
537945173	Affx-1249989476	AX-584506189	TAACAAATATATGCAAAATCCAAGTAATATACCTA[C/T]ATATTTATACTTTCCTAGCCGTCGCTAACCGCTCA	Y	2	1	2	1	10198	f		218	mosquito (Aedes albopictus)	chr2.125_4220180	chr2.125	4220180	T	C	standard	0.802	recommended
535809119	Affx-1248925840	AX-582381739	TGGAATATGTGGAAACATCGCATTATCCAATCGAA[C/T]GAAACAATTGGTTAAGTATGACAAAAAGTTGTCAC	Y	2	1	2	1	10198	f		218	mosquito (Aedes albopictus)	chr3.74_679547	chr3.74	679547	C	T	standard	0.802	recommended
536790573	Affx-1249403268	AX-583355841	CACAGCATTCGGAGAGTGTGCGGAGGTTGGTGTGA[A/G]ATAGTTTTGTAACAAGTCTAGGATAAGAGGGACTT	R	2	1	2	1	10198	r		218	mosquito (Aedes albopictus)	chr1.141_80263	chr1.141	80263	G	A	standard	0.802	recommended
535029408	Affx-1251377056	AX-581616182	GGTGCAATCGATGCACTCTGCGTGACGACAGAAAT[A/G]AAGTGAAAAGTGCAATGCAATTTACCATTTTCTTC	R	2	1	2	1	10198	f		218	mosquito (Aedes albopictus)	chr3.20_10906809	chr3.20	10906809	G	A	standard	0.802	recommended
538344911	Affx-1250389302	AX-584904621	TCACATCACAGTGATACTGCTGAATAATCGAAAGT[G/T]AAATCAGTGAAATTGGAACATTTTGGCGTGAAAAA	K	2	1	2	1	10198	f		218	mosquito (Aedes albopictus)	chr2.196_4380702	chr2.196	4380702	G	T	standard	0.802	recommended
536276971	Affx-1249147307	AX-582843848	CGGAAAAAAATAGCAGCCATGAATGTTGAAGTGAA[C/T]CGGGTTCGCACCTACCGTCGCTGGGAAGACACGGA	Y	2	1	2	1	10198	f		218	mosquito (Aedes albopictus)	chr3.77_10329541	chr3.77	10329541	T	C	standard	0.802	recommended
537754568	Affx-1249886589	AX-584316148	AATCTGATGGTTGTATTCTAGTATCGAAATGAAGT[A/T]ATGTTAGGCATGATTAATGTATAAGATGAGCCCTT	W	4	1	2	1	10198	f		218	mosquito (Aedes albopictus)	chr2.103_867111	chr2.103	867111	A	T	standard	0.802	recommended
537952755	Affx-1249997058	AX-584513753	CACTAATACCACTTTTTGTCCTTCTCGAAGAAAGA[A/C]GCCTCGGAAATTTTCTTATTATTGTTTTCTTCGTG	M	2	1	2	1	10198	f		218	mosquito (Aedes albopictus)	chr2.125_6701527	chr2.125	6701527	C	A	standard	0.802	recommended
536077719	Affx-1249047557	AX-582644996	TCACTTATAATGACCGATAATGAGCACCGAAAAAT[C/T]TGTTTTATTTCGCCTCGCTGCTACTCTCTGCAGTG	Y	2	1	2	1	10198	f		218	mosquito (Aedes albopictus)	chr2.175_198219	chr2.175	198219	C	T	standard	0.802	recommended
536477181	Affx-1249246636	AX-583043496	GAGGACGATCCAGCCGATCCAGTTCTTCCGGTGGT[A/G]TTCCTTCTGTTACGCATTTCTGTAGCTATTGGAGC	R	2	1	2	1	10198	r		218	mosquito (Aedes albopictus)	chr1.10_1669982	chr1.10	1669982	G	A	standard	0.802	recommended
537869514	Affx-1249944118	AX-584430779	GGTGCTTTGGAAGAAATGATAACAGAAACAAAGAT[A/T]GCCTCGGGAGATAAAACGGATAAATCAAACGAAGA	W	4	1	2	1	10198	f		218	mosquito (Aedes albopictus)	chr2.118_477567	chr2.118	477567	T	A	standard	0.802	recommended
535092354	Affx-1251403700	AX-581678661	CCTGAAATACATGTATTAATTGGTGTGTAATTAGC[A/T]TTTCGTTAATAGTTCTGTACACTCTTTGTATTGAA	W	4	1	2	1	10198	f		218	mosquito (Aedes albopictus)	chr3.28_490552	chr3.28	490552	T	A	standard	0.802	recommended
535931171	Affx-1248977201	AX-582502212	AAATCTTCTCAGAACTCCCGTCTAAAAAATCTTAT[C/T]ATTTTTAATGTCTTTCCTTCCATCAGTAGATCATC	Y	2	1	2	1	10198	r		218	mosquito (Aedes albopictus)	chr2.17_24063106	chr2.17	24063106	C	T	standard	0.802	recommended
532965604	Affx-1250536166	AX-579583902	GCTTGTCATTGAAAACGTGAGAAGTTTCAAATGTA[C/G]CATTTAGAATCACATTCCCCTTCCCAGCGTGTTAA	S	4	1	2	1	10198	f		218	mosquito (Aedes albopictus)	chr2.36_6914401	chr2.36	6914401	G	C	standard	0.802	recommended
533579279	Affx-1250842971	AX-580197150	AAGGTCATTGACCTTATCTTTCCCATGTATAAATC[G/T]AATCCGAAGCTTGTTTATCTTCTACGGCTGTTCTA	K	2	1	2	1	10198	f		218	mosquito (Aedes albopictus)	chr2.95_2593187	chr2.95	2593187	T	G	standard	0.802	recommended
536241687	Affx-1249129613	AX-582808623	GTCAATTGACTGTTGCTTCGGCTTCTTAAGCAGAT[A/T]CACACATGCATATTGCGTTAATTATTCAGGTTGGT	W	4	1	2	1	10198	f		218	mosquito (Aedes albopictus)	chr3.77_1145417	chr3.77	1145417	T	A	standard	0.802	recommended
537493680	Affx-1249754538	AX-584056108	CTGACTTGAAGCATTGCCTTACGTTTGCTCGATTA[A/G]CTCATTAGACCTGATTAACTATGGGCTTATCCTCT	R	2	1	2	1	10198	r		218	mosquito (Aedes albopictus)	chr1.85_19450900	chr1.85	19450900	A	G	standard	0.802	recommended
533690668	Affx-1250884998	AX-580307339	AGTTCATTCTTAACTCCTTTAAGAAATCTTGGCGA[A/G]GTTATCGATAAATTCTCGTGTCGAAATCTTTGGAA	R	2	1	2	1	10198	r		218	mosquito (Aedes albopictus)	chr2.97_13436411	chr2.97	13436411	G	A	standard	0.802	recommended
538020175	Affx-1250064499	AX-584580877	AATTGTTGACTTAGCTTTAGCTTTGTCAATATATC[A/G]AACTGAATAAAAGAAATAAATTAATACTTTGCATA	R	2	1	2	1	10198	f		218	mosquito (Aedes albopictus)	chr2.148_344469	chr2.148	344469	G	A	standard	0.802	recommended
536182477	Affx-1249099907	AX-582749547	CCAAGACGATTCTGCAAGTAGCAATAAAAAGAGCT[A/G]AACCCTCCTGACCCAACTCCCGAGTAGGTAGGTAC	R	2	1	2	1	10198	f		218	mosquito (Aedes albopictus)	chr3.75_14363498	chr3.75	14363498	G	A	standard	0.802	recommended
538752315	Affx-1250281658	AX-585305903	ATCTGATGCTAGGACATACTGCTCAATAAATGAAA[G/T]GAATACATTTTATTTCTAACGCTCGTTTAAAATCC	K	2	1	2	1	10198	r		218	mosquito (Aedes albopictus)	chr2.186_11250099	chr2.186	11250099	T	G	standard	0.802	recommended
533394759	Affx-1250750968	AX-580012803	ATGGATGTATTGTTACCCAAGTGCAGAGAAACATG[A/G]CATATTGTTAAGAAGAAGATATGGCGAAGCCATAG	R	2	1	2	1	10198	f		218	mosquito (Aedes albopictus)	chr2.87_772961	chr2.87	772961	A	G	standard	0.802	recommended
537562251	Affx-1249790717	AX-584124486	ACCAACTAAAAGCACTTTTCTTGTGTTATGTACAA[A/T]TCCAGCCTTAAAAATAACTCTCAGTGCAAAATTAA	W	4	1	2	1	10198	f		218	mosquito (Aedes albopictus)	chr1.90_2603395	chr1.90	2603395	A	T	standard	0.802	recommended
538282379	Affx-1250326757	AX-584842262	TTCTTATGAGATAATATGTAAATATGCTGGAACAT[A/T]CAGACGGCTAATTTGCAACTCGCTGAGCATATGAT	W	4	1	2	1	10198	f		218	mosquito (Aedes albopictus)	chr2.186_25696579	chr2.186	25696579	A	T	standard	0.802	recommended
534196759	Affx-1251089885	AX-580802705	TGACGTCACTCAAATCACTTTTTTGGGAGAGTTTT[C/T]TACTGCTTTTGGTCGAAGCGGATGTGATAATCGAT	Y	2	1	2	1	10198	r		218	mosquito (Aedes albopictus)	chr3.146_1059730	chr3.146	1059730	C	T	standard	0.802	recommended
532984236	Affx-1250544726	AX-579602531	CACTTTGATAAAGTCAATTTTGAAAAATTGGTTCG[C/G]ATTTGTAGATGATGGCGGTTTACTTTTTAAATCTT	S	4	1	2	1	10198	r		218	mosquito (Aedes albopictus)	chr2.38_3201642	chr2.38	3201642	G	C	standard	0.802	recommended
536559397	Affx-1249287657	AX-583125404	AATGTTTGCTACCTGGTAAAAAATGGCTTTCTTTT[G/T]TGTTCTACTAGGTATGGGAGTATGGTATTTCAGTA	K	2	1	2	1	10198	r		218	mosquito (Aedes albopictus)	chr1.107_174608	chr1.107	174608	G	T	standard	0.802	recommended
535127036	Affx-1251415178	AX-581712919	TAATGTGAGCACATGTGCATTTAGAGACCCAATAG[C/T]ATGCCGCGTTGCAAAGAGAGAGATTAATGGGAATA	Y	2	1	2	1	10198	f		218	mosquito (Aedes albopictus)	chr3.29_1646419	chr3.29	1646419	C	T	standard	0.802	recommended
533353376	Affx-1250730210	AX-579971445	GGCGGAAGACATACGGGTTTCACATTATCTGAAAG[G/T]ACCTAGAACTATGATTGGGCTTCTAAAATAAGGTA	K	2	1	2	1	10198	f		218	mosquito (Aedes albopictus)	chr2.82_16432940	chr2.82	16432940	G	T	standard	0.802	recommended
534499137	Affx-1251195570	AX-581098221	TAGTTTGGCGATCTAAGCCAATCAATGGTTGTAAA[G/T]TGATCTTAAAATATGCGCTTTAATGTACTTAAGCT	K	2	1	2	1	10198	f		218	mosquito (Aedes albopictus)	chr3.166_6137571	chr3.166	6137571	T	G	standard	0.802	recommended
535319747	Affx-1251486875	AX-581903437	GAGTTTCAAATGCGTTTAAAACTTTGTTAGAATTT[C/T]TTGTTTGCTTTGTAAACGTCGCTAGCTGTGTGTTA	Y	2	1	2	1	10198	r		218	mosquito (Aedes albopictus)	chr3.45_11927476	chr3.45	11927476	C	T	standard	0.802	recommended
536192673	Affx-1249104558	AX-582759727	CGAAAGCATGCAATTGTACTTGAAACAATGTTGTT[A/C]ACTGTTTGTAATTTCCACCAAATTCATATCATTAC	M	2	1	2	1	10198	r		218	mosquito (Aedes albopictus)	chr3.75_15787534	chr3.75	15787534	C	A	standard	0.802	recommended
533020317	Affx-1250562724	AX-579638593	AGTGGGTACATACAGAGTTACATATTAGAGAAGTG[C/T]CATTGTAGTCACATTCATGTACGCTCGAAGTACAT	Y	2	1	2	1	10198	r		218	mosquito (Aedes albopictus)	chr2.42_4782860	chr2.42	4782860	C	T	standard	0.802	recommended
536159673	Affx-1249088547	AX-582726792	AATGTTGTTCGAAAGCTAAGCAAAGAATTCTACGA[A/G]AAATATTCCAAAACAATTCTCTATAACTTCTACAA	R	2	1	2	1	10198	f		218	mosquito (Aedes albopictus)	chr3.75_10072612	chr3.75	10072612	G	A	standard	0.802	recommended
533097479	Affx-1250602248	AX-579715726	CCAAAATGGTCGCATGGGGAACGATAAAATAAAAT[G/T]CTCATCACAGTTGTACTCTGAGCAGACAACTCCTG	K	2	1	2	1	10198	f		218	mosquito (Aedes albopictus)	chr2.48_8326499	chr2.48	8326499	T	G	standard	0.802	recommended
538096094	Affx-1250140449	AX-584656420	AATTTAGGTTAAACGCCTGGTAAATCCTTACGCAA[C/T]CCAGAGAACTTTCAAGAAAAACCGAAATGGTAAGG	Y	2	1	2	1	10198	f		218	mosquito (Aedes albopictus)	chr2.167_700527	chr2.167	700527	T	C	standard	0.802	recommended
537443110	Affx-1249729206	AX-584005732	GTATGTGTCATCCCGATGGACACTATTCCTATGTT[C/T]CGATTGTGCTTATGCGCTTTATATTGATATTGGCT	Y	2	1	2	1	10198	r		218	mosquito (Aedes albopictus)	chr1.85_7208643	chr1.85	7208643	C	T	standard	0.802	recommended
536153668	Affx-1249084991	AX-582720802	TGAGTGACCACTTTGACAAGGGGTCATATTTTGGG[C/T]ACATTACGCATTAACGCAGTCAACTTTATATAAAT	Y	2	1	2	1	10198	r		218	mosquito (Aedes albopictus)	chr3.75_8751265	chr3.75	8751265	C	T	standard	0.802	recommended
538259822	Affx-1250304198	AX-584819761	ACATTAAGGATTCACAGAGAAATAAATCCCATTAA[A/T]TCTGAAGACTTTCCACAAAGAACTCTTGGAGAATT	W	4	1	2	1	10198	f		218	mosquito (Aedes albopictus)	chr2.186_18800669	chr2.186	18800669	T	A	standard	0.802	recommended
533077286	Affx-1250592026	AX-579695537	CAGACAGGTACGTACCTAGCAGAGCTATTAAGCTA[C/T]ATATGCGTGGATTGAATAGGTTGAAATGGGCAGAA	Y	2	1	2	1	10198	f		218	mosquito (Aedes albopictus)	chr2.48_2091457	chr2.48	2091457	C	T	standard	0.802	recommended
534718423	Affx-1251261585	AX-581309908	GATTCGACATCTGGTGCAGATTTATCGGAGAATCA[A/T]TTTGAGCCGACGTTCGCTAGAATCACAGTACAAAA	W	4	1	2	1	10198	f		218	mosquito (Aedes albopictus)	chr3.170_13192039	chr3.170	13192039	A	T	standard	0.802	recommended
535322766	Affx-1251487329	AX-581906410	TGCACTCATTAGCGGATAGGACAAATTGTTTGAAA[C/T]TGAAAAAGAGCTCCTTTATAGAGTAAACCGGGTGG	Y	2	1	2	1	10198	f		218	mosquito (Aedes albopictus)	chr3.45_12051429	chr3.45	12051429	C	T	standard	0.802	recommended
536154084	Affx-1249085203	AX-582721218	CCACTTTCACAACGATCCGCAGGTATATTTTTTGT[C/T]ATTCAAATTTCCAATGATTAGCATATTTTGTGACT	Y	2	1	2	1	10198	r		218	mosquito (Aedes albopictus)	chr3.75_8846664	chr3.75	8846664	C	T	standard	0.802	recommended
534688394	Affx-1251251255	AX-581281788	AAGTTAAAAATAATTGTGTATGAGAAGGTTGCTAA[A/T]CAAGATATTTTATAGATTCTAATTACAAATTCAGA	W	4	1	2	1	10198	f		218	mosquito (Aedes albopictus)	chr3.170_7770841	chr3.170	7770841	T	A	standard	0.802	recommended
538784980	Affx-1250314328	AX-585338491	GCAGATGTTCCAGTGGAAATCGAACCCCCTCTTGG[C/T]TACAATGTCACGTTAAACGTTCCTATCTATCACTT	Y	2	1	2	1	10198	r		218	mosquito (Aedes albopictus)	chr2.186_21723782	chr2.186	21723782	C	T	standard	0.802	recommended
535625877	Affx-1248862001	AX-582204614	TTGAGTAGGTTGCTGTAAGGACACGTCGATCGTTA[A/G]GTGATTTAAGACTCGATAGTTGAATGAAGTTGAAA	R	2	1	2	1	10198	r		218	mosquito (Aedes albopictus)	chr3.69_5638399	chr3.69	5638399	A	G	standard	0.802	recommended
535900315	Affx-1248962240	AX-582471412	AAAACTGTAAAAACGTTTTGGCATGACGTCCCTTG[C/T]TGTCTTTTTGAAGTCCATATGGAATCTACAATTTG	Y	2	1	2	1	10198	r		218	mosquito (Aedes albopictus)	chr2.17_17809368	chr2.17	17809368	C	T	standard	0.802	recommended
536052327	Affx-1249034810	AX-582619666	GCTCGCTCACTCACTTTACATACGATGTTCACAAT[C/T]CCACCGTAAAAGGAGACCAAATTCCGCATTCCAAC	Y	2	1	2	1	10198	f		218	mosquito (Aedes albopictus)	chr2.172_3569200	chr2.172	3569200	C	T	standard	0.802	recommended
533389685	Affx-1250748399	AX-580007732	TTTTGTTTACATTTTTCGGTGAATTTACAGGAATT[C/T]ACCGAACGCTCAGCTATTTTCATAGTTACCGATCT	Y	2	1	2	1	10198	f		218	mosquito (Aedes albopictus)	chr2.86_408167	chr2.86	408167	C	T	standard	0.802	recommended
533019514	Affx-1250562317	AX-579637792	TTCACTGTTGGGCTAGCTCTGAGTGCAGCGGATGG[A/T]TTGAAAAAATTATTGTCACCATCGTACAGGTCATA	W	4	1	2	1	10198	r		218	mosquito (Aedes albopictus)	chr2.42_4608054	chr2.42	4608054	T	A	standard	0.802	recommended
535177127	Affx-1251434234	AX-581762437	AACGCCAACGAAACCTGTCGTAACGTCCTTAAAAG[A/G]CTCCTAAAATCCCCTGAAACGATCGCTGGAAATTT	R	2	1	2	1	10198	f		218	mosquito (Aedes albopictus)	chr3.32_2741993	chr3.32	2741993	G	A	standard	0.802	recommended
538720132	Affx-1250249471	AX-585273794	AGCACAGCTATGACGTGCAGTTTTCCTCAATGTTT[A/C]TTGGAAATTCTTGGGTTGTTGCGAATAATTGTGAG	M	2	1	2	1	10198	r		218	mosquito (Aedes albopictus)	chr2.182_7382524	chr2.182	7382524	C	A	standard	0.802	recommended
538816320	Affx-1250345673	AX-585369748	AAAGATTTCCTTTGAAAAGCAATTAAACATCGTTT[A/T]ATGTAATGAGTTTTGGATTAAAGGAAACTCGGGTT	W	4	1	2	1	10198	r		218	mosquito (Aedes albopictus)	chr2.19_374415	chr2.19	374415	A	T	standard	0.802	recommended
536731650	Affx-1249374862	AX-583297025	ACACAGAAGAATACTGTTTAGTACACTGGATCGAA[A/T]TACAACCCAGCTAGCTTTATTACTTGACTATTTAT	W	4	1	2	1	10198	f		218	mosquito (Aedes albopictus)	chr1.139_976563	chr1.139	976563	A	T	standard	0.802	recommended
538216241	Affx-1250260612	AX-584776263	TGTTGCGTTTGTTCGTTGGTGTTCAGATTGCTAAA[A/G]TTTCCAGCTGTTGGTGGTGGGTTCGATTGTTTGTG	R	2	1	2	1	10198	f		218	mosquito (Aedes albopictus)	chr2.186_3439849	chr2.186	3439849	G	A	standard	0.802	recommended
537593256	Affx-1249806159	AX-584155422	AATGCAAACATAATTCAAACAACAGGGAAGAGCTA[A/G]ACCATTTCCTTCTTTTTCTATTAAGGAAAATATGT	R	2	1	2	1	10198	f		218	mosquito (Aedes albopictus)	chr1.90_7356672	chr1.90	7356672	G	A	standard	0.802	recommended
533293295	Affx-1250698877	AX-579911415	GGAATTGTACATTAACCGATAATGTGAGTGTTAGT[C/T]GTTGCGACAGTTTATATAAAGGCACTTGCCCACTT	Y	2	1	2	1	10198	r		218	mosquito (Aedes albopictus)	chr2.82_404904	chr2.82	404904	T	C	standard	0.802	recommended
535355278	Affx-1251498015	AX-581938522	TTAGCCAGCTCCTCAAACGACGTCATCCTATGTAT[A/G]TTATTCTCTGAGCCATTCCTTATCCGAACGCCACC	R	2	1	2	1	10198	r		218	mosquito (Aedes albopictus)	chr3.49_1491663	chr3.49	1491663	G	A	standard	0.802	recommended
536279768	Affx-1249148753	AX-582846645	GACTAGAACGACTTCTCATGGAAACTCACTAGACT[G/T]ATAAAAGCGATGATGAACGGTGTAAAAACTATGTA	K	2	1	2	1	10198	f		218	mosquito (Aedes albopictus)	chr3.77_10862266	chr3.77	10862266	G	T	standard	0.802	recommended
538536481	Affx-1250065777	AX-585090839	GTATACTCCATCTGATTCATGTAAGAAGATAAGCA[A/T]GATATATACTAATCTGCATTTTCTGATGAAAACAT	W	4	1	2	1	10198	r		218	mosquito (Aedes albopictus)	chr2.151_2523333	chr2.151	2523333	A	T	standard	0.802	recommended
536321414	Affx-1249169561	AX-582888212	TGCTGAATGATAAACGCTGAATCGTATCAGCTATA[C/G]CAGCAGTCCCACCAACGTGATGTAGGCATCGTGAC	S	4	1	2	1	10198	f		218	mosquito (Aedes albopictus)	chr3.77_19790973	chr3.77	19790973	C	G	standard	0.802	recommended
537695250	Affx-1249856837	AX-584257108	TGATCGTATCATAATCTCCCGAACATCTTAAATCT[C/T]AAACAGAAAAAAAACTGACAACTCTTTCCCCCCAC	Y	2	1	2	1	10198	f		218	mosquito (Aedes albopictus)	chr1.91_6941121	chr1.91	6941121	C	T	standard	0.802	recommended
536366143	Affx-1249192066	AX-582932758	CAATAACAATTAGGGTTAGAACAATTAGTTCTGAA[A/G]CGAATTAAACTTCCATGAATAGGCTAGAATGCCCT	R	2	1	2	1	10198	f		218	mosquito (Aedes albopictus)	chr3.82_3643277	chr3.82	3643277	A	G	standard	0.802	recommended
534887102	Affx-1251320774	AX-581474810	CTTCTTTGTCTTTGTTTCTTCCGGAGAGTCAGAAA[C/T]CTTACGTTCTCGTCTCATTAGACGTCTAGATTCAA	Y	2	1	2	1	10198	r		218	mosquito (Aedes albopictus)	chr3.180_8059217	chr3.180	8059217	C	T	standard	0.802	recommended
536351395	Affx-1249183598	AX-582918042	TCACCATACAAAAAATCAGTTTCAATCTAGTACTT[C/T]ATTGATTGTGCCCTAAGAAAATGTATCTAATTTTC	Y	2	1	2	1	10198	r		218	mosquito (Aedes albopictus)	chr3.82_823211	chr3.82	823211	T	C	standard	0.802	recommended
538110869	Affx-1250155227	AX-584671164	AATGACGTTTTCTTTGTCATCCCTAAATGATAAGC[C/T]AGTGATTTAAACTCTATATGTCGAGTAGATTGATA	Y	2	1	2	1	10198	f		218	mosquito (Aedes albopictus)	chr2.17_229369	chr2.17	229369	C	T	standard	0.802	recommended
533052130	Affx-1250579372	AX-579670399	GTCAAGGTGATATTTTTAAATGGGAAAGCACATAC[C/T]TCAACAACAACAATCGACCTTGTAGGATAGCTCTC	Y	2	1	2	1	10198	f		218	mosquito (Aedes albopictus)	chr2.42_11676833	chr2.42	11676833	T	C	standard	0.802	recommended
533661875	Affx-1250875136	AX-580278979	TATACGTCATTTATTGTAGATCATTATGAAAAGTA[A/G]AATGTTATTTTCTGCCGTCCACAATCAAATGGTTG	R	2	1	2	1	10198	r		218	mosquito (Aedes albopictus)	chr2.97_10380517	chr2.97	10380517	A	G	standard	0.802	recommended
534455193	Affx-1251180974	AX-581056374	AATTCGAAAATAATTGATTTAATTGAATTTAACTG[A/T]TGAAACAATTGGGTCTCAAGCTGTTATCACCTGAA	W	4	1	2	1	10198	f		218	mosquito (Aedes albopictus)	chr3.166_572804	chr3.166	572804	T	A	standard	0.802	recommended
536162769	Affx-1249089563	AX-582729878	AAGAATTCAATATTCCCATTTGATCAAATCTTACG[A/G]CACTAATATGTCTGTTTTACTGTTCCGATGTTAAA	R	2	1	2	1	10198	r		218	mosquito (Aedes albopictus)	chr3.75_10569106	chr3.75	10569106	G	A	standard	0.802	recommended
538896911	Affx-1250426285	AX-585450050	GTGCCGCGATGGATTCGTAGGTAAGTTGTTAGCTT[C/G]ATTTTGCTTTAATAATGGTCTTTTGAGATTTTGTT	S	4	1	2	1	10198	r		218	mosquito (Aedes albopictus)	chr2.198_4764553	chr2.198	4764553	G	C	standard	0.802	recommended
534401898	Affx-1251165352	AX-581003455	TTCGTTGGCACAAGGTTACCAAAATGTGAATCAAT[A/T]TTACAGGCAAACAGAAGAAAAAAAAAAAACGATCT	W	4	1	2	1	10198	f		218	mosquito (Aedes albopictus)	chr3.16_14511388	chr3.16	14511388	T	A	standard	0.802	recommended
533543015	Affx-1250823792	AX-580160931	GGCTTTCGGTTGTTGGGATCAATGTAGAACACCTT[C/T]TCTCGTGATTCTTTATCAATCACTGGTTGACGGCA	Y	2	1	2	1	10198	r		218	mosquito (Aedes albopictus)	chr2.87_30396594	chr2.87	30396594	C	T	standard	0.802	recommended
533321699	Affx-1250713037	AX-579939786	AATGGAATTCGCAGAACACTGGGCGACACAAATTA[C/T]TACTGAATTGGTTAACTTATTCGAGCTCGTGCGTT	Y	2	1	2	1	10198	r		218	mosquito (Aedes albopictus)	chr2.82_9839948	chr2.82	9839948	C	T	standard	0.802	recommended
537473772	Affx-1249744538	AX-584036265	TCCTTGATAGCATATTGTCACCTCCAATCACGGCT[C/T]GTTGTAGTACAGATTAACTTGATGTGGGTACCTAT	Y	2	1	2	1	10198	r		218	mosquito (Aedes albopictus)	chr1.85_15285173	chr1.85	15285173	C	T	standard	0.802	recommended
538589599	Affx-1250118920	AX-585143661	ATTCCTCTTAGTATTACTTCATGTCCATGCATTTC[C/T]TTGAACATTTCATAGGAGAATTCTCCACCGATTCT	Y	2	1	2	1	10198	r		218	mosquito (Aedes albopictus)	chr2.158_177941	chr2.158	177941	T	C	standard	0.802	recommended
535884257	Affx-1248955858	AX-582455713	TAGCTCGGGAAGCTCATCCCGGATGTGCTGGCTTC[A/G]TTTACATCGTTCAAGCTGACCACATCGTAGATCGA	R	2	1	2	1	10198	r		218	mosquito (Aedes albopictus)	chr2.17_15810963	chr2.17	15810963	G	A	standard	0.802	recommended
534927238	Affx-1251336357	AX-581514650	AAAAAATTGATTTCTTGGGCGAAGGTCAGGTATGT[A/T]CTCCCGAAAAGATAAGTATTTCCCTCGATTGATAA	W	4	1	2	1	10198	f		218	mosquito (Aedes albopictus)	chr3.19_2766354	chr3.19	2766354	A	T	standard	0.802	recommended
535920968	Affx-1248972707	AX-582492029	AGATTTATTCTATTTGTAAATGACTTAGAAACGAA[A/T]TCAACCACACCTTCCACATCCTATTGGGTAGCATT	W	4	1	2	1	10198	f		218	mosquito (Aedes albopictus)	chr2.17_22516443	chr2.17	22516443	T	A	standard	0.802	recommended
533340535	Affx-1250723822	AX-579958609	AACTAGCCCACGGAACAGCCAATCAAGAAGTCAAA[A/C]AGTTTTATTCAGGCGGTGAATTTTGTAATACCAGG	M	2	1	2	1	10198	f		218	mosquito (Aedes albopictus)	chr2.82_14633497	chr2.82	14633497	A	C	standard	0.802	recommended
537881786	Affx-1249950245	AX-584443025	AATTGATAAAAATCTCTGAGTAAATAACTGTTGAA[A/G]TGCTCATTATAATTACCATGCTAAGAATCAGGATT	R	2	1	2	1	10198	f		218	mosquito (Aedes albopictus)	chr2.118_3454824	chr2.118	3454824	A	G	standard	0.802	recommended
537962901	Affx-1250007206	AX-584523860	CCATTTACCCATATCTAGAGAAGCCTAGTAGAGCA[A/G]AAGCCTACCTGTTCAGCATGATCTCGAACGCGACC	R	2	1	2	1	10198	f		218	mosquito (Aedes albopictus)	chr2.129_825749	chr2.129	825749	A	G	standard	0.802	recommended
536580226	Affx-1249298067	AX-583146189	GTTTTTGTTGGAATCTGTGGAAAAATTCTTGCTGG[A/T]ATCACTCAATGAAATTGGGCAAGAATCTCTGGAGG	W	4	1	2	1	10198	r		218	mosquito (Aedes albopictus)	chr1.113_3563596	chr1.113	3563596	A	T	standard	0.802	recommended
536465411	Affx-1249241629	AX-583031755	GAGAAATTCTAAAGATATATCGGGAGAAATATCGA[G/T]AGAAATCCCGTGAAAAATCGATGTAGGAGTTCCGG	K	2	1	2	1	10198	f		218	mosquito (Aedes albopictus)	chr3.97_120723	chr3.97	120723	T	G	standard	0.802	recommended
536968990	Affx-1249492375	AX-583533802	TAAATTATGTTATGTTTGTTTCTGTTCATCTCTGT[C/T]TAGCTCTTAGACTTTCACATCAGGTACTGACTGTG	Y	2	1	2	1	10198	r		218	mosquito (Aedes albopictus)	chr1.152_6544332	chr1.152	6544332	T	C	standard	0.802	recommended
535726032	Affx-1248895924	AX-582303190	ATTCAATTAGGAAAAAAGCTGCCACAGCATTGATT[A/G]ATTCCATTATTTTCATTATCATGCTCTTATAACCA	R	2	1	2	1	10198	r		218	mosquito (Aedes albopictus)	chr3.70_190348	chr3.70	190348	G	A	standard	0.802	recommended
537655057	Affx-1249836945	AX-584217024	CAGTCTGGAACAATCGATGCCAATCAATTTGCATA[C/T]CAGCAGGGCAGTGCATTCGATCCTAACTTCCAACA	Y	2	1	2	1	10198	f		218	mosquito (Aedes albopictus)	chr1.91_567893	chr1.91	567893	T	C	standard	0.802	recommended
532907546	Affx-1250506433	AX-579525872	GTATACGCGCGCGTGGAATCAAAATAATCGTCCGC[C/T]TGTTTCATTGAGTAGTGTAAAAATAAAGAAGATAA	Y	2	1	2	1	10198	r		218	mosquito (Aedes albopictus)	chr2.27_1637673	chr2.27	1637673	C	T	standard	0.802	recommended
536864189	Affx-1249441262	AX-583429263	AAAAGTGGAACAAGTTTGCGCTAATTGAATTAGAA[C/T]TGGGCATTCGCCACCGTCGTTACCACCATCACCAC	Y	2	1	2	1	10198	f		218	mosquito (Aedes albopictus)	chr1.147_5517235	chr1.147	5517235	T	C	standard	0.802	recommended
538129569	Affx-1250173931	AX-584689831	CACATACTTTCCATACAGAAAAACCAATACGCATA[A/T]TCCGTAGTCGTATGTAGTAGTAGTAGAGTGCCTGG	W	4	1	2	1	10198	f		218	mosquito (Aedes albopictus)	chr2.17_6146862	chr2.17	6146862	A	T	standard	0.802	recommended
538003958	Affx-1250048273	AX-584564773	ATACTTTTATTAAAAGTCTCGTCAAAACTTTAACA[A/G]TCATTGGCAATGTGGAAAAACCAGTGCTAATAAGT	R	2	1	2	1	10198	f		218	mosquito (Aedes albopictus)	chr2.140_17860601	chr2.140	17860601	A	G	standard	0.802	recommended
536210804	Affx-1249113584	AX-582777831	ACTCCTTTACCAATCCCCGTTTAAAAAATATATTA[C/T]ATTTGATTCTAGTTGACTTCGGAAGCCGCACGCCG	Y	2	1	2	1	10198	r		218	mosquito (Aedes albopictus)	chr3.75_18715991	chr3.75	18715991	T	C	standard	0.802	recommended
537489659	Affx-1249752544	AX-584052104	CTGGAGCCAACTCGAGAGGCACTCCAGGCCCCGGT[A/G]TGTCCCATTGTATGTGTGCTCATTTCAATAACAAA	R	2	1	2	1	10200	r		218	mosquito (Aedes albopictus)	chr1.85_18921022	chr1.85	18921022	G	A	standard	0.8	recommended
534284589	Affx-1251122408	AX-580888286	ATATATTACGACTCTTCTCTTACCCATTGTATCAT[G/T]ACGATAACCTCAGGCACGAAGCCAGCGTGGCTGAG	K	2	1	2	1	10200	f		218	mosquito (Aedes albopictus)	chr3.151_11461971	chr3.151	11461971	G	T	standard	0.8	recommended
533783245	Affx-1250924879	AX-580398129	AAACCAGATGATGACGAGTAACGTTTTTCTATCGA[C/T]ATGTTTGCATAGGTAAATAAGAATGAAAAATCAGG	Y	2	1	2	1	10200	r		218	mosquito (Aedes albopictus)	chr3.109_1332728	chr3.109	1332728	T	C	standard	0.8	recommended
535708127	Affx-1248889321	AX-582285466	ACGGGAGACAGTGTTATTTTTACTATTTTCCATAT[A/C]GTTCATCATCATTCGCCTCGGAATGTAAATCTGAA	M	2	1	2	1	10200	r		218	mosquito (Aedes albopictus)	chr3.7_6668434	chr3.7	6668434	C	A	standard	0.8	recommended
538590558	Affx-1250119879	AX-585144605	CAAGGTCTTTAACATATATGGATTATTTTCCTAAC[A/T]ATCATTGCTATTCAGTCGAAGAATAAACCTCGTTT	W	4	1	2	1	10200	r		218	mosquito (Aedes albopictus)	chr2.161_74296	chr2.161	74296	A	T	standard	0.8	recommended
537295325	Affx-1249657376	AX-583858707	AGAGCCGCTCGTAAACATCGAAACTACTCATCAAG[A/G]AAAGCTCACGCGTGCCATTGTTTTCTCGCACTCTT	R	2	1	2	1	10200	f		218	mosquito (Aedes albopictus)	chr1.67_9612970	chr1.67	9612970	G	A	standard	0.8	recommended
538390791	Affx-1250435195	AX-584950342	CACGTTAAATTATTGCATGTAATTTTAATCTAGGT[A/G]ATAAGTTCAACATTAGCGTATTAAACCCTAGTTTT	R	2	1	2	1	10200	f		218	mosquito (Aedes albopictus)	chr2.202_70488	chr2.202	70488	A	G	standard	0.8	recommended
535216546	Affx-1251449006	AX-581801420	AAGCGAATGTGAAAAATCGTAATTTACATAACGTT[C/G]AATCTAATACAATAAAATTACTAATCCACGTTCTA	S	4	1	2	1	10200	r		218	mosquito (Aedes albopictus)	chr3.40_1444294	chr3.40	1444294	G	C	standard	0.8	recommended
533419107	Affx-1250763109	AX-580037139	GTGTTTGATGCTTCCGAACAAAAGATTGGGTATCA[A/G]AAGATAATGATTTATTCTTGGGAAACTGCATTCAA	R	2	1	2	1	10200	f		218	mosquito (Aedes albopictus)	chr2.87_5764164	chr2.87	5764164	A	G	standard	0.8	recommended
534466570	Affx-1251185720	AX-581067443	ATATATTAGCTTTCTTTGAGATTACTCGTTTAGAG[C/T]TTAAGTAAAGGTGTGCCTTTTACTCTTCTTCTTAA	Y	2	1	2	1	10200	r		218	mosquito (Aedes albopictus)	chr3.166_2158704	chr3.166	2158704	T	C	standard	0.8	recommended
534956404	Affx-1251348408	AX-581543614	AAAAGAAAAACTAGGATCAGACTGCAATTAGTGTT[C/T]ATTCATTATTCAGAGAGCTCATTTCTCATTCATAC	Y	2	1	2	1	10200	r		218	mosquito (Aedes albopictus)	chr3.20_50553	chr3.20	50553	T	C	standard	0.8	recommended
537916607	Affx-1249967633	AX-584477716	GACAACTTGTAAAAAATGCATGTTATTTTAGAATG[A/G]AAATTGAAGAACTATTCAACCATTGCGTCAATATA	R	2	1	2	1	10200	f		218	mosquito (Aedes albopictus)	chr2.122_4627962	chr2.122	4627962	A	G	standard	0.8	recommended
534201977	Affx-1251090334	AX-580807817	ATTACTTCTAATAAACCATTAAATCGCCTCGCCAT[C/T]GCCATCACCATCGACATCGAAAGTTCCTAAATGAG	Y	2	1	2	1	10200	f		218	mosquito (Aedes albopictus)	chr3.146_1312401	chr3.146	1312401	T	C	standard	0.8	recommended
533039702	Affx-1250572446	AX-579657973	AGAAACACAAACGTCCTATTAATTTCCCACCGAAA[C/T]AATTCTGCCCAAGTGGCAGCATTTAATAACATTCT	Y	2	1	2	1	10200	r		218	mosquito (Aedes albopictus)	chr2.42_9172322	chr2.42	9172322	T	C	standard	0.8	recommended
533292751	Affx-1250699925	AX-579910871	GGTGCTCGTAGTATGCAGGTACCAATAAAAATGAT[A/T]AACAGTTCCTGCGTTCCGGTGCTGTGCGGAGCTGG	W	4	1	2	1	10200	f		218	mosquito (Aedes albopictus)	chr2.82_663624	chr2.82	663624	A	T	standard	0.8	recommended
538093460	Affx-1250137814	AX-584653797	GAGTCTATTGATCCAAATGCACAATTCTTCCACAA[A/C]CCGAACCAATATTTCAGCATGAGTGCACACTGCAA	M	2	1	2	1	10200	f		218	mosquito (Aedes albopictus)	chr2.163_10610020	chr2.163	10610020	C	A	standard	0.8	recommended
536177456	Affx-1249097411	AX-582744537	CATTCGCATGACTAGAAGAGCTGCAATAGATGAAA[C/T]TATTATTTTTCAATTGTTGTGTTAATTCTATTTTG	Y	2	1	2	1	10200	f		218	mosquito (Aedes albopictus)	chr3.75_13549484	chr3.75	13549484	T	C	standard	0.8	recommended
534130978	Affx-1251075807	AX-580742445	AAGTCCGACGTTTCTTCGTACCGCCGCGGGTCGCT[A/G]CATTCGTTTTCGATGGTGCACACGTATGACTGGAA	R	2	1	2	1	10200	r		218	mosquito (Aedes albopictus)	chr3.145_5915221	chr3.145	5915221	G	A	standard	0.8	recommended
536052928	Affx-1249034649	AX-582620267	CCACATCGAACAGAATGCTGCAAGCCCTTTTTAAT[G/T]TTTCATCGAAGTTCAAAGATGAATGGTTGTGTTGT	K	2	1	2	1	10200	r		218	mosquito (Aedes albopictus)	chr2.172_3500990	chr2.172	3500990	G	T	standard	0.8	recommended
533285661	Affx-1250696366	AX-579903788	GAATCAACAAGAAATCAACTTATTTAGATTGGAAT[A/C]ATAAACTGCACTCCAATTTTGTTATTGTTTTACTT	M	2	1	2	1	10200	f		218	mosquito (Aedes albopictus)	chr2.73_543986	chr2.73	543986	C	A	standard	0.8	recommended
538121508	Affx-1250165868	AX-584681782	AGAATCGTAAGAGTAAAGAACAACACCTTGAAGAA[C/G]CAACTGAACTAAACAGTACGGAAGAAACCCCACCA	S	4	1	2	1	10200	f		218	mosquito (Aedes albopictus)	chr2.17_3926378	chr2.17	3926378	C	G	standard	0.8	recommended
536049498	Affx-1249033377	AX-582616839	TTAACGGTAAATTTATGAAAATAGATTGCATACAG[A/G]TTGTGGAAATGTGACTACATAGAGAAGAACACATA	R	2	1	2	1	10200	f		218	mosquito (Aedes albopictus)	chr2.172_3215219	chr2.172	3215219	A	G	standard	0.8	recommended
537231398	Affx-1249623247	AX-583795161	AGAATATCTTTCAGACGCATCAGACCATCGTCACT[A/G]TCGTATATGATCGTGAAGCTCTTCCAACTGTAGTC	R	2	1	2	1	10200	r		218	mosquito (Aedes albopictus)	chr1.50_12639324	chr1.50	12639324	G	A	standard	0.8	recommended
536138681	Affx-1249078014	AX-582705836	AACTATTGTGTATACTTCATTTAACACCATTAAAA[C/T]ATATACAATCAGCCTTTGTTAGCTTCAACGAAATC	Y	2	1	2	1	10200	f		218	mosquito (Aedes albopictus)	chr3.75_6393248	chr3.75	6393248	C	T	standard	0.8	recommended
538229226	Affx-1250273598	AX-584789225	TGTCTTCTTTGCTGGCATGTTAAATTATTGTCACA[C/T]AATGTAAGCAACGATTTTATCTTTTTGTCATCAAA	Y	2	1	2	1	10200	f		218	mosquito (Aedes albopictus)	chr2.186_8336100	chr2.186	8336100	C	T	standard	0.8	recommended
536115187	Affx-1249066291	AX-582682397	CGAAATTGCTTTATCCAATGGGAAACTTGATTCAA[A/C]GCTGCTGTTCTTGTTCTCAACCAGACGAGTTAGTG	M	2	1	2	1	10200	f		218	mosquito (Aedes albopictus)	chr3.75_2417866	chr3.75	2417866	C	A	standard	0.8	recommended
537912682	Affx-1249964443	AX-584473809	CGTCGCGGTGGTGTGTTCCAAGTCACCGAACGATG[C/T]CTTGATTTCAAAATGTCGATCTGCCAACGACTCTT	Y	2	1	2	1	10200	r		218	mosquito (Aedes albopictus)	chr2.122_3724903	chr2.122	3724903	C	T	standard	0.8	recommended
535880085	Affx-1248954429	AX-582451600	GAGGAGGAAGAGCAAAACATATCTCAACTCAAACA[A/G]CAAACTGTGAAAAGGAAACGAGTAAAGCCGCTGCG	R	2	1	2	1	10200	f		218	mosquito (Aedes albopictus)	chr2.17_15457806	chr2.17	15457806	A	G	standard	0.8	recommended
535558547	Affx-1248839947	AX-582138579	GATTTATAGGAAGAGGTGAGTAATAAATATTAAAG[A/T]ATTCGTGATTCCTAAAAATGTCAGCGACAAAAGCT	W	4	1	2	1	10200	f		218	mosquito (Aedes albopictus)	chr3.66_1781887	chr3.66	1781887	T	A	standard	0.8	recommended
537984802	Affx-1250029116	AX-584545662	CAAAGAAAAGACTGGATTAAGGATATATTATCGAA[A/G]TCGGGCACGGAGATCAAGGAAGTTCCTGCAGAAGG	R	2	1	2	1	10200	f		218	mosquito (Aedes albopictus)	chr2.140_9849060	chr2.140	9849060	G	A	standard	0.8	recommended
534850084	Affx-1251307721	AX-581438606	TCTTCGCAGTTTTTTTTTCTTCTTTGCAGCAACGG[A/T]TCTCAAGGCCTATCTTACGCTTCAGAATGAAGGGA	W	4	1	2	1	10200	r		218	mosquito (Aedes albopictus)	chr3.180_3980880	chr3.180	3980880	T	A	standard	0.8	recommended
537915808	Affx-1249965994	AX-584476925	TTGATTTTTATAGACGTACTTCACGCTGGTGGATG[A/G]TTTATCACCATGATACACACTTTTGGAAACGGCCA	R	2	1	2	1	10200	r		218	mosquito (Aedes albopictus)	chr2.122_3968801	chr2.122	3968801	A	G	standard	0.8	recommended
533330382	Affx-1250717396	AX-579948466	AAATAAAGTTCAAATTGAAGCCACGAGCTGTGGTG[A/G]TTTCTGGAAGCGTGTAATAGGCGCAAACATAGCCC	R	2	1	2	1	10200	r		218	mosquito (Aedes albopictus)	chr2.82_11363925	chr2.82	11363925	G	A	standard	0.8	recommended
538845753	Affx-1250375113	AX-585399067	AGGAAAGTCCTCCGAGTGGATATTGATGCAAGTTG[C/T]ATTGTAAATTGCCTGTTGATTGAATAGCGGATTGC	Y	2	1	2	1	10200	r		218	mosquito (Aedes albopictus)	chr2.193_816633	chr2.193	816633	C	T	standard	0.8	recommended
537225962	Affx-1249622599	AX-583789739	TTCAAGTCATGTCATGAAATTGAACGAGTATAGCA[A/G]ATAGTGTCCAAAATAGAACCCCCTGTCCATAATAC	R	2	1	2	1	10200	f		218	mosquito (Aedes albopictus)	chr1.50_12395625	chr1.50	12395625	G	A	standard	0.8	recommended
537938126	Affx-1249982427	AX-584499150	GGTGGTAAATCCGGATCAAGTCGTTCGTCAAGCAA[A/G]TCATCTCGTTCGAAATCACAGCAACAGCAACAATC	R	2	1	2	1	10200	f		218	mosquito (Aedes albopictus)	chr2.125_1844777	chr2.125	1844777	A	G	standard	0.8	recommended
538129667	Affx-1250174029	AX-584689929	TGAAATTGACGTTTCCTATGACTTTCTATGGACGA[A/T]TTTCGAATCGATTCGTCTATACCTAATTAGACGAG	W	4	1	2	1	10200	f		218	mosquito (Aedes albopictus)	chr2.17_6159918	chr2.17	6159918	T	A	standard	0.8	recommended
537448161	Affx-1249733742	AX-584010752	ATCTACGATTTGCGTAAATTTCACCATTGTTTACA[A/G]TTTCAATTACGTTGGGCACCCCAACCGATGAGTAA	R	2	1	2	1	10200	f		218	mosquito (Aedes albopictus)	chr1.85_10555316	chr1.85	10555316	A	G	standard	0.8	recommended
538251206	Affx-1250295579	AX-584811173	TTCGATGTAGGCGTCAGCTTCCCATTCTCAGTCAA[A/G]CTGTAAAAGACAGACAATCGAATTTGCATTATCGT	R	2	1	2	1	10200	f		218	mosquito (Aedes albopictus)	chr2.186_15825996	chr2.186	15825996	A	G	standard	0.8	recommended
537109012	Affx-1249564028	AX-583673260	ATGCAGATTCCGACATATTTGTTTTAGGATTTACC[A/T]TACTTTGCACTGCGAAGGTGTGCCACGGCTGCGGC	W	4	1	2	1	10200	f		218	mosquito (Aedes albopictus)	chr1.36_780828	chr1.36	780828	A	T	standard	0.8	recommended
534885040	Affx-1251319957	AX-581472950	TTCCGTGTTGTCAAAAAAGTGCGTTGTTGAACATT[A/C]GATTCGTGGTGTTGATTACTTAATCCGATTGTTGA	M	2	1	2	1	10200	r		218	mosquito (Aedes albopictus)	chr3.180_7744694	chr3.180	7744694	A	C	standard	0.8	recommended
538066607	Affx-1250110951	AX-584627085	TAAATATTTGGTACTTACCGCCACACATGATAAGC[A/G]ATCAGCGGAATGTTGATGGCCAACGAGAACCATTC	R	2	1	2	1	10200	f		218	mosquito (Aedes albopictus)	chr2.155_15874179	chr2.155	15874179	A	G	standard	0.8	recommended
538107408	Affx-1250151765	AX-584667720	CTGTACACTGAATAATGCACTTTGTTGGAAGATGA[A/T]CCACTCATCGTGTATTGGGAATGGGGCAATCGATT	W	4	1	2	1	10200	f		218	mosquito (Aedes albopictus)	chr2.167_4358074	chr2.167	4358074	A	T	standard	0.8	recommended
537444925	Affx-1249730123	AX-584007540	GAGTCTTTCATAAACTTATAAAAAGCTAGTTTTAT[G/T]TTACGTTACAATCTCCAATCCCGAGACTCCAATCT	K	2	1	2	1	10200	r		218	mosquito (Aedes albopictus)	chr1.85_7560393	chr1.85	7560393	T	G	standard	0.8	recommended
532897768	Affx-1250502236	AX-579516094	GCATTATTTACATTTCCGAGTCTGCCAAAACAAGT[C/T]GAAAATTAACTACGCTCCAAATCGGTGGCGGCTGT	Y	2	1	2	1	10200	f		218	mosquito (Aedes albopictus)	chr2.27_187043	chr2.27	187043	C	T	standard	0.8	recommended
538364801	Affx-1250409197	AX-584924442	ATCATAGAAACTAGCTGTTAAAACTCTATTTCAAG[A/G]TAGTGAACCAAATTTTTAGAAGTTGTGCGGCTTTG	R	2	1	2	1	10200	f		218	mosquito (Aedes albopictus)	chr2.196_13824194	chr2.196	13824194	G	A	standard	0.8	recommended
538521972	Affx-1250051259	AX-585076476	GAAGGGGACACCGCTCGGTTCCATTACGATCAGTT[C/T]CTATCCATTTATCAGCGCTTCAAGGTGAGTGAGTG	Y	2	1	2	1	10200	r		218	mosquito (Aedes albopictus)	chr2.140_19541452	chr2.140	19541452	T	C	standard	0.8	recommended
537143244	Affx-1249581162	AX-583707358	CCCGCATGTTTGGCAAATAACTGGACCGAAAATCT[A/T]TACGACATTCTCGTACAGACTTTGTTTGTCAGTGA	W	4	1	2	1	10200	f		218	mosquito (Aedes albopictus)	chr1.41_2892257	chr1.41	2892257	A	T	standard	0.8	recommended
533804493	Affx-1250933478	AX-580419360	AATAAGTTTCAATTAAATATGAGCACTTTAATAAA[A/G]ATAAACGTAGCCCCTTCCCCGTTGTAGCCTATTTC	R	2	1	2	1	10200	f		218	mosquito (Aedes albopictus)	chr3.109_4227273	chr3.109	4227273	G	A	standard	0.8	recommended
534216229	Affx-1251097241	AX-580821762	AGTTAGTCATTCTTGTTACCTTCAGGAGAACGTGG[A/T]TTTACGCTTTTGCTTAATCAACTCGAACAGGATGA	W	4	1	2	1	10200	r		218	mosquito (Aedes albopictus)	chr3.151_1405475	chr3.151	1405475	A	T	standard	0.8	recommended
536386352	Affx-1249201092	AX-582952888	ACAAAGGCAAGAAAAGAAAAAAAAGTCGGAAGTTA[C/T]TACTTTCATTGGCGACGAGTCTTCCAAAAACGGAC	Y	2	1	2	1	10200	r		218	mosquito (Aedes albopictus)	chr3.9_2081557	chr3.9	2081557	T	C	standard	0.8	recommended
538624268	Affx-1250153596	AX-585178220	TATTCCGAGGTTATCTTCTATATGTCATTTGGAGG[A/G]ATTGTAAAGAAAAGTGCTACCTTCCTGATCGTAGA	R	2	1	2	1	10200	r		218	mosquito (Aedes albopictus)	chr2.167_5406903	chr2.167	5406903	G	A	standard	0.8	recommended
533674875	Affx-1250879667	AX-580291801	CGGGTGCAGAATTGAGCGCGAGACGGTGTGAGAAG[G/T]TTTAGTGTTTGTCGTTGTATCGTTAATAAATTTGT	K	2	1	2	1	10200	r		218	mosquito (Aedes albopictus)	chr2.97_11829683	chr2.97	11829683	T	G	standard	0.8	recommended
534707895	Affx-1251257966	AX-581301133	CGCGGAGAATTGTTCGTAGATAAATTGATCGATGG[A/T]ATTCATGTGTCAGTGGACAATGTTTTACTTCGTGG	W	4	1	2	1	10200	f		218	mosquito (Aedes albopictus)	chr3.170_11926263	chr3.170	11926263	T	A	standard	0.8	recommended
533769613	Affx-1250918702	AX-580384863	GTTGTCAAAATACAAAATGGTGGTTGAAAAGTGTG[A/T]AAGTGAATTTGGAGCTAGAAATAATCCATGAGAAC	W	4	1	2	1	10200	r		218	mosquito (Aedes albopictus)	chr3.1_11591100	chr3.1	11591100	A	T	standard	0.8	recommended
537841874	Affx-1249930204	AX-584403226	AACGTTTAAAGTTTAAATTGAACATACAACAGAGA[A/G]ATAAAACTGTACAGAAATCACGAGGTGAGTAGAAA	R	2	1	2	1	10200	f		218	mosquito (Aedes albopictus)	chr2.107_4502631	chr2.107	4502631	A	G	standard	0.8	recommended
535946422	Affx-1248981718	AX-582513978	TCGACTTTCTTCGTTTGCTATCAGTTCAACACTAT[A/T]TCCAACTTTCACGTATTTTTATGTCACTTTCAGAA	W	4	1	2	1	10200	f		218	mosquito (Aedes albopictus)	chr2.17_26537474	chr2.17	26537474	A	T	standard	0.8	recommended
533919995	Affx-1250976648	AX-580532458	TGCCAAAAGGGTTGGAATTCCAAAATACTGGTAAT[C/T]AAAGCTGAAATACTTCTCCTTCTCTGATATTCATT	Y	2	1	2	1	10200	f		218	mosquito (Aedes albopictus)	chr3.119_1809747	chr3.119	1809747	T	C	standard	0.8	recommended
536187887	Affx-1249102576	AX-582754952	ATTGGCAATTTGTTATCGCAAAACACCACTAAAAC[A/G]TAATTTCAACTAAAGATGTTTACAGTTTCGTTAAT	R	2	1	2	1	10200	f		218	mosquito (Aedes albopictus)	chr3.75_15083646	chr3.75	15083646	A	G	standard	0.8	recommended
537286737	Affx-1249653082	AX-583850171	ACTAAACAATATGTTTTGTTCAAACTCTTAAATCT[C/T]ACTAAAGTTATAGCACTAAAACTTATATCAAACGG	Y	2	1	2	1	10200	f		218	mosquito (Aedes albopictus)	chr1.67_4607370	chr1.67	4607370	T	C	standard	0.8	recommended
535173335	Affx-1251432399	AX-581758652	TTCTTAATAGTGCTAGTATTATGAGTTTCGTAACT[A/T]ACAAAGACTTAAACTCCAACTGATAGGAAAAACCA	W	4	1	2	1	10200	f		218	mosquito (Aedes albopictus)	chr3.32_2291937	chr3.32	2291937	T	A	standard	0.8	recommended
533771735	Affx-1250920491	AX-580386867	CTGGCAGCAAGTAGTCGCGACTAAATTTTACATGA[A/G]TGAGACCTTACCATCAGAGCGGCCACCAGGTCCAG	R	2	1	2	1	10200	f		218	mosquito (Aedes albopictus)	chr3.1_12043355	chr3.1	12043355	A	G	standard	0.8	recommended
536534026	Affx-1249275961	AX-583100129	CCTAATGGAAGCGATCAAGTGATCGACATTCAAAT[G/T]AGTCATTTCATCTATGATCTACGGTAATCACGATG	K	2	1	2	1	10200	f		218	mosquito (Aedes albopictus)	chr1.106_268941	chr1.106	268941	T	G	standard	0.8	recommended
538380872	Affx-1250425275	AX-584940467	ACAGGGTGGTACATCAAAGGTCACGCAACTGAAAT[G/T]CCTTCTTGCCTCGCAAGTTCTCACTCTCGAAAAAA	K	2	1	2	1	10200	f		218	mosquito (Aedes albopictus)	chr2.198_4340384	chr2.198	4340384	G	T	standard	0.8	recommended
536911919	Affx-1249465146	AX-583476879	GGCAGGAAGCTCTGAACAGTTTTGTCAACAACAAT[C/T]CAGTTCTCCGGGGAGGAGGGAAAGAGGCTTAGCAC	Y	2	1	2	1	10200	f		218	mosquito (Aedes albopictus)	chr1.149_5058680	chr1.149	5058680	C	T	standard	0.8	recommended
535794702	Affx-1248920151	AX-582367601	TGCTTTTTCTTTTACAGCAAGCAACCTTCTATCCA[C/G]CGCACCGTGCGCCGTGTCAGCATCAACAGCCCTCC	S	4	1	2	1	10200	f		218	mosquito (Aedes albopictus)	chr3.73_1086376	chr3.73	1086376	G	C	standard	0.8	recommended
534268847	Affx-1251116164	AX-580872836	ACCTAATTGAATTTCCTTATCACAATTTGAATGTA[A/G]TGTAATCAAACCACAAACACTATGCATTTGCGTTG	R	2	1	2	1	10200	r		218	mosquito (Aedes albopictus)	chr3.151_8338369	chr3.151	8338369	A	G	standard	0.8	recommended
536612839	Affx-1249314328	AX-583178629	TGCAGACTACGCTTTTGTAGGAAGTGGTGGCTAGG[C/T]TTGATAAGCTCACATCTGCTCAAATCATTTATTTA	Y	2	1	2	1	10200	r		218	mosquito (Aedes albopictus)	chr1.116_4250387	chr1.116	4250387	C	T	standard	0.8	recommended
537333617	Affx-1249676478	AX-583896808	AGTGTGTGTTTGTGTGTATCGGAATACATAAAATC[A/G]GTCGTTTCCTGTCGCAGCATTTGAATTTGATTGCC	R	2	1	2	1	10200	f		218	mosquito (Aedes albopictus)	chr1.7_8141250	chr1.7	8141250	G	A	standard	0.8	recommended
532818930	Affx-1250462175	AX-579437286	GCAAGAATGATTTTTCTCTCATCTTAATAAGAGCA[A/T]TCTCTTCATCATCTATTGGTTCACTCAAAAGTGCA	W	4	1	2	1	10200	r		218	mosquito (Aedes albopictus)	chr2.205_8876708	chr2.205	8876708	A	T	standard	0.8	recommended
537943182	Affx-1249987485	AX-584504201	AATTTAGTTGATTATTACGGATAACTAGAAAAATC[G/T]TAAGGATTAAAAATTTCGGTTGAACAAAACCGATT	K	2	1	2	1	10200	f		218	mosquito (Aedes albopictus)	chr2.125_3694175	chr2.125	3694175	G	T	standard	0.8	recommended
537632622	Affx-1249824274	AX-584194672	TACGTTGTCCATTCGCCTAGTATGTTGTGTCATTA[C/T]TCTTGTTTCTACGTTGTATCTCCTGTGTAAGTTGT	Y	2	1	2	1	10200	r		218	mosquito (Aedes albopictus)	chr1.90_13434369	chr1.90	13434369	C	T	standard	0.8	recommended
537637435	Affx-1249826675	AX-584199478	GAGTCTCTCTCACCCTAAAACTAAAAAGAAAGGGT[C/T]TTTCAAATATGTAAATGAAGATATGTAGCAAAAGT	Y	2	1	2	1	10200	r		218	mosquito (Aedes albopictus)	chr1.90_14407401	chr1.90	14407401	C	T	standard	0.8	recommended
537165202	Affx-1249590176	AX-583729252	GACTAACTTTTATTTCACTGGCTGGTTATCTAGTT[A/G]TGACTTTCAGATCTTTATGGTACAAGTGGTAGCAG	R	2	1	2	1	10200	r		218	mosquito (Aedes albopictus)	chr1.41_7246394	chr1.41	7246394	A	G	standard	0.8	recommended
537796306	Affx-1249907432	AX-584357807	TCAAACTCATGGTTTTAATACAATATTATCCTAAA[A/G]GTGTGAATAAAACATCACGACCAATTTCTACGTAT	R	2	1	2	1	10200	f		218	mosquito (Aedes albopictus)	chr2.103_6777401	chr2.103	6777401	A	G	standard	0.8	recommended
537720492	Affx-1249869495	AX-584282245	AAAATAAAAAGAAGAAGCGTAAAAGGCTTGCAATA[C/T]ATGATGATTGGCGGAAAGTAAAACCATTTCCAAAC	Y	2	1	2	1	10200	f		218	mosquito (Aedes albopictus)	chr1.96_691350	chr1.96	691350	T	C	standard	0.8	recommended
533494320	Affx-1250799434	AX-580112273	ACGGTTTCGTTAACAGACTTGTCGCCAGAGTCGGT[A/G]GCTTGCAAGATGTAGTGCCATTTGGAAACATCTTT	R	2	1	2	1	10200	r		218	mosquito (Aedes albopictus)	chr2.87_19982177	chr2.87	19982177	A	G	standard	0.8	recommended
536368429	Affx-1249193204	AX-582935039	GAATGTGAATTTATTGAGCCTCAGTTGCAACATAG[A/G]AAAATATAACTTATAAAGTCATCTCAACGTGTCTG	R	2	1	2	1	10200	f		218	mosquito (Aedes albopictus)	chr3.82_3961616	chr3.82	3961616	A	G	standard	0.8	recommended
538611325	Affx-1250140650	AX-585165298	AAAATGCTGCTGGCTAGTATGTATTTATGATGATG[A/G]TGGTCAGTTTGTCAGTCATCTGATGCTACAGGACG	R	2	1	2	1	10200	r		218	mosquito (Aedes albopictus)	chr2.167_747200	chr2.167	747200	A	G	standard	0.8	recommended
537683427	Affx-1249849804	AX-584245320	GATATTCTTAAACAGCATTGCTTGTAAAAACACAG[A/C]TATTCTCTTGTTTTGCTGATAAAGTGACTATCCGA	M	2	1	2	1	10200	r		218	mosquito (Aedes albopictus)	chr1.91_4432782	chr1.91	4432782	C	A	standard	0.8	recommended
538524490	Affx-1250053777	AX-585078989	CATATCGCTGTTCCAGATCTAATTTTGATTTCACA[C/T]TTTACCTAATACTTCGTCTAATACGAATTGACACA	Y	2	1	2	1	10200	r		218	mosquito (Aedes albopictus)	chr2.140_21140769	chr2.140	21140769	T	C	standard	0.8	recommended
537800606	Affx-1249908452	AX-584362103	TTTGGGCAAGTACGGTGGACTGAAAGAAGAATTTA[G/T]TGTCAAATGTTTGCTCACCAAAGAACGAATTCATT	K	2	1	2	1	10200	r		218	mosquito (Aedes albopictus)	chr2.103_7046279	chr2.103	7046279	G	T	standard	0.8	recommended
533574576	Affx-1250840612	AX-580192454	TTTCTTACCTACGGGTTTAGGCGATCTTCAGCATA[A/G]AAAGGCCGAAATCCGCTTTGTCAGCAAAAGTTGCA	R	2	1	2	1	10200	f		218	mosquito (Aedes albopictus)	chr2.95_1356414	chr2.95	1356414	G	A	standard	0.8	recommended
536466743	Affx-1249241379	AX-583033081	TGACTTTGATTTGATGGGAACTTTATACAATTTTT[A/C]CTAGTAACAAATCAATATTTACTTCCAAAATAACA	M	2	1	2	1	10200	r		218	mosquito (Aedes albopictus)	chr3.95_4827769	chr3.95	4827769	A	C	standard	0.8	recommended
536572535	Affx-1249294211	AX-583138508	CCTGATACCCATTGGAACCCCCCTACAATTAACTG[A/G]GTTCATCTGTAACGTCCCTAATAGTCCTTGAAACT	R	2	1	2	1	10200	r		218	mosquito (Aedes albopictus)	chr1.113_2000422	chr1.113	2000422	G	A	standard	0.8	recommended
538161195	Affx-1250205559	AX-584721367	AAAAACAGATCCAAAAATATCCCAAATTAATAGCT[A/T]CAAGAAGGAATTTTCTTTTTCCAAGAGCTTCACGG	W	4	1	2	1	10200	f		218	mosquito (Aedes albopictus)	chr2.175_9788142	chr2.175	9788142	T	A	standard	0.8	recommended
533301575	Affx-1250702994	AX-579919672	CTGCCTGTTGTGGGTTTTTCGGGTGCCTACCGTAA[C/T]TTAATTGTTACTGACTGCATCAAAATATAATTTCA	Y	2	1	2	1	10200	r		218	mosquito (Aedes albopictus)	chr2.82_3819977	chr2.82	3819977	T	C	standard	0.8	recommended
534771780	Affx-1251280663	AX-581361474	AGTGAAACTCTTCTAAACATACTTTTTCTAACGCA[A/T]AAACGTCTGATCAATTTCGACCTGGAGATCAATTT	W	4	1	2	1	10200	f		218	mosquito (Aedes albopictus)	chr3.171_127493	chr3.171	127493	A	T	standard	0.8	recommended
538798378	Affx-1250327727	AX-585351861	CTTCCGAGCGAAAGTAAGATATTGATTTCTTTTTT[A/G]AGCTTTCTATCTATAGCTTACTTTCTATCTCTCCA	R	2	1	2	1	10200	r		218	mosquito (Aedes albopictus)	chr2.186_25916533	chr2.186	25916533	A	G	standard	0.8	recommended
533433967	Affx-1250770496	AX-580051978	AATTGAATTCTATTTGTCAGAAGTTGAAATGTCAA[A/C]TCCGTTTAGCATCAGCGCCTTGAGTGTTGGTATGA	M	2	1	2	1	10200	f		218	mosquito (Aedes albopictus)	chr2.87_8391463	chr2.87	8391463	C	A	standard	0.8	recommended
534802250	Affx-1251290745	AX-581391525	TTTTTACGTATTTATCCATGTCACTTTGACTCGAA[A/G]TCGATTCATGCCAAGGTTCCTTCTGACACACAAGA	R	2	1	2	1	10200	f		218	mosquito (Aedes albopictus)	chr3.178_2494732	chr3.178	2494732	G	A	standard	0.8	recommended
535835823	Affx-1248936838	AX-582408070	ATTGGGTTTCAAGAATTTTCTTATGAGTTTTCCGA[G/T]GTACTGTTGTAAGGTGAGATTTGGAATTCATAACT	K	2	1	2	1	10200	r		218	mosquito (Aedes albopictus)	chr2.17_9192958	chr2.17	9192958	T	G	standard	0.8	recommended
535290074	Affx-1251477839	AX-581874218	ACAATTGAATTTTATAAGTGTCGGTGACATAATGG[A/C]TGAAGAATCAAGGGTAGTAGAGAAACTAAAGCAAC	M	2	1	2	1	10200	r		218	mosquito (Aedes albopictus)	chr3.45_7323197	chr3.45	7323197	C	A	standard	0.8	recommended
536755385	Affx-1249386771	AX-583320732	GTATCAGCATCTTTATATAATCCATTCACTATCCA[A/T]TCCAGATCCAAAAAGTCAATCTGAGTCCAATCCAA	W	4	1	2	1	10200	f		218	mosquito (Aedes albopictus)	chr1.139_6690107	chr1.139	6690107	A	T	standard	0.8	recommended
537043398	Affx-1249531140	AX-583607930	GGTTATTTACCTGCGCCATCTGACAGCAAATACAA[A/T]TACTCAATCTACCAACTCATCTCACCGATCTCAAA	W	4	1	2	1	10200	f		218	mosquito (Aedes albopictus)	chr1.25_5279277	chr1.25	5279277	T	A	standard	0.8	recommended
536439782	Affx-1249228775	AX-583006164	CGAAATCACCATCCATTCAGAAAATCACTTCATAA[A/T]GAAATGATCTTTTCTCATTTGAGTAATTGAAACTC	W	4	1	2	1	10200	f		218	mosquito (Aedes albopictus)	chr3.95_691020	chr3.95	691020	T	A	standard	0.8	recommended
535680643	Affx-1248879814	AX-582258383	GTGCGCACAAAAAGGTGTATTTCATAAACCGGAAG[C/T]CGTCTACTTGTATTTCAGAATGGCGGCGGACAGCG	Y	2	1	2	1	10200	f		218	mosquito (Aedes albopictus)	chr3.7_2966369	chr3.7	2966369	T	C	standard	0.8	recommended
538208416	Affx-1250252785	AX-584768459	ATATCATGAATTCTTTCATTCTAATGTCGGGAAAC[C/T]CAACGACCCTCTCGAAGTCCTGGGAGAAGTGAAAC	Y	2	1	2	1	10200	f		218	mosquito (Aedes albopictus)	chr2.186_841927	chr2.186	841927	T	C	standard	0.8	recommended
536600747	Affx-1249309407	AX-583166583	GAGCTTTGAGCCCAAGATCTCTAAAGCTTCCAGAT[A/G]AAGCACTCTGAAGTTTGCAGGTGTATCTCTGTAGA	R	2	1	2	1	10200	f		218	mosquito (Aedes albopictus)	chr1.116_2171995	chr1.116	2171995	A	G	standard	0.8	recommended
533589681	Affx-1250848154	AX-580207531	CATTAATGATTTTCTATCGCAAAATAACTTTCAAT[A/T]TTGATGCATATTACTGAACAACGTATAATTTTCGA	W	4	1	2	1	10200	f		218	mosquito (Aedes albopictus)	chr2.95_4865892	chr2.95	4865892	T	A	standard	0.8	recommended
536332843	Affx-1249174368	AX-582899597	TAAACAGATTATAAAAATTGAATGTATATACAACG[G/T]TTTTTCGCACAGAACATCTGAATTTATGCTAGGTA	K	2	1	2	1	10200	r		218	mosquito (Aedes albopictus)	chr3.78_1391612	chr3.78	1391612	G	T	standard	0.8	recommended
537730976	Affx-1249873577	AX-584292662	AGGCCAAAGTTTTGGGAATTGTTTTTTAGTTGCGT[C/T]TTATGGCCTCCCATGTTACTTAATCATCGGCCTCA	Y	2	1	2	1	10200	r		218	mosquito (Aedes albopictus)	chr2.100_1171005	chr2.100	1171005	T	C	standard	0.8	recommended
533231764	Affx-1250668160	AX-579849923	TCTTTCATGGGAAAATTGTAATCTACAATCTGGGA[A/C]TTTACCGACGAGATTGGTGAAGCAAAAGGAGAAAT	M	2	1	2	1	10200	r		218	mosquito (Aedes albopictus)	chr2.62_3210161	chr2.62	3210161	C	A	standard	0.8	recommended
537675888	Affx-1249847321	AX-584237793	TTATCGAAGAAAACTGTTTGTATTCACAGAGAGAT[A/G]TCATCCAAATTCATCAAAAGTGGCTGATTAGTTTC	R	2	1	2	1	10200	f		218	mosquito (Aedes albopictus)	chr1.91_4110406	chr1.91	4110406	G	A	standard	0.8	recommended
533369915	Affx-1250737132	AX-579987975	AGTTTAGGTTTATCACTGTTTGGATGAATAGACGG[A/G]TACGTTCCTGATCTGGGATATTGGCTGAAAGCTTC	R	2	1	2	1	10200	r		218	mosquito (Aedes albopictus)	chr2.82_19316044	chr2.82	19316044	G	A	standard	0.8	recommended
534708185	Affx-1251259253	AX-581301421	CATTTGTAATTGATTAGGTAAATATATTTATTGAG[G/T]TTAATTACTTTTCGGCGTGAATTGCAACGTTTCTT	K	2	1	2	1	10200	r		218	mosquito (Aedes albopictus)	chr3.170_12392505	chr3.170	12392505	G	T	standard	0.8	recommended
538293507	Affx-1250337888	AX-584853368	CGTACAGATAAAGTAGAACTGGATAGATGCCGAAT[C/T]ATGTTCCAATTTTTCGCCCGAGTAAGGTGAAATAA	Y	2	1	2	1	10200	f		218	mosquito (Aedes albopictus)	chr2.186_28880347	chr2.186	28880347	T	C	standard	0.8	recommended
536526257	Affx-1249271085	AX-583092373	TTCGGCCAACGGACATCGCGCAGTCCTCAGGATCT[C/T]AGCTTCATATGTCATACCTCGTTTGGTATTTGTGC	Y	2	1	2	1	10200	r		218	mosquito (Aedes albopictus)	chr1.102_2050255	chr1.102	2050255	C	T	standard	0.8	recommended
537894225	Affx-1249955135	AX-584455424	GACAATGTTCTGTCCTCGGTTCTTTCGGCCAATTT[C/T]GTTTTGGATGTGAATATGGTGTTTCTGTTTACTCA	Y	2	1	2	1	10200	r		218	mosquito (Aedes albopictus)	chr2.119_1465704	chr2.119	1465704	C	T	standard	0.8	recommended
535284552	Affx-1251475663	AX-581868767	TCGCTTCGTTCGCTGCTATCGGTTTTGAATAGGTA[A/C]ACGACGAGCGCGTGAGAGTTTACCTACGACGACTA	M	2	1	2	1	10200	f		218	mosquito (Aedes albopictus)	chr3.45_6087137	chr3.45	6087137	C	A	standard	0.8	recommended
536898055	Affx-1249458173	AX-583463061	AACCAATAAATCACTCCCTTCCACTAGGTTAAACT[A/G]CCCCTGTATGAGACCCGATACGAATTGGATGTCAC	R	2	1	2	1	10200	f		218	mosquito (Aedes albopictus)	chr1.149_1679916	chr1.149	1679916	G	A	standard	0.8	recommended
536671272	Affx-1249344638	AX-583236845	CTCTACATTTATTTGGACTTATAATGAAACGATTA[C/T]TATTGACTTATCATTCTAACGACATATAGTCAACA	Y	2	1	2	1	10200	f		218	mosquito (Aedes albopictus)	chr1.130_192044	chr1.130	192044	T	C	standard	0.8	recommended
533874719	Affx-1250959185	AX-580489504	TTTCACACTGGTAAGTTGGTTATAGTAGAAACAAC[A/G]ATAATGGCTGGTAGGTATGAAAACTACACTCAGGA	R	2	1	2	1	10200	f		218	mosquito (Aedes albopictus)	chr3.116_1150198	chr3.116	1150198	A	G	standard	0.8	recommended
537952981	Affx-1249997284	AX-584513978	ATAGCATTTAAGATGTCTACTTGAAGGTTAAAAAT[G/T]GCGAGGGAAACTCGAAAAAGAAATAATTTTTACCA	K	2	1	2	1	10200	f		218	mosquito (Aedes albopictus)	chr2.125_6814349	chr2.125	6814349	G	T	standard	0.8	recommended
537150107	Affx-1249584615	AX-583714191	CCAAAAGAATTGGCACGTTTTAATAACTGGTATGA[A/G]CTCATTTGAGAAAGACTGATGAAGTCGCATCGCAA	R	2	1	2	1	10200	f		218	mosquito (Aedes albopictus)	chr1.41_4662496	chr1.41	4662496	G	A	standard	0.8	recommended
534755042	Affx-1251276153	AX-581344987	TGGAAAACTGCCAACGAAACCAGGCAGCAGCAGCG[A/T]ATGGATTTGTGTAGCTGAGGCTAGTTAATTGGATA	W	4	1	2	1	10200	r		218	mosquito (Aedes albopictus)	chr3.170_19486232	chr3.170	19486232	T	A	standard	0.8	recommended
534309016	Affx-1251134837	AX-580912174	CTTTTCGTTACTAGCTCTAAGCTTCACACTTATAG[C/T]TTTTGGCTTTCGGTTTCATGCATCTAGTTTCTGTC	Y	2	1	2	1	10200	r		218	mosquito (Aedes albopictus)	chr3.16_445413	chr3.16	445413	T	C	standard	0.8	recommended
536991413	Affx-1249505008	AX-583556107	ATTATGTTTGTTTTTCATGTAGAGATGAATGACCT[A/G]GAATAGAGTTAAGAGCTTACAATGCCAACAGCAAC	R	2	1	2	1	10200	f		218	mosquito (Aedes albopictus)	chr1.170_417603	chr1.170	417603	A	G	standard	0.8	recommended
535130878	Affx-1251416916	AX-581716713	GGTCTTAATTTATCCAGTTGCTGTGTTCTTATCAG[A/T]TGGCTTTATATAACAGTGCAAACAGCGCTAATCAA	W	4	1	2	1	10200	r		218	mosquito (Aedes albopictus)	chr3.29_2883034	chr3.29	2883034	A	T	standard	0.8	recommended
536108079	Affx-1249062204	AX-582675298	GAAAGCCATTTTCTTGTTCTTTGCTAAAATATTTG[C/T]CTTGAAAATGTCTATCTTTTCTCTTGAAAATCTTA	Y	2	1	2	1	10200	r		218	mosquito (Aedes albopictus)	chr3.75_1455298	chr3.75	1455298	C	T	standard	0.8	recommended
533759980	Affx-1250914776	AX-580375593	GTAAATAACTTAGTTGGACGGAGATTTCTTCTCTT[C/T]ATTAGTAGTATTGTCGTACGATGAAATGTTATTGC	Y	2	1	2	1	10200	r		218	mosquito (Aedes albopictus)	chr3.1_10036162	chr3.1	10036162	C	T	standard	0.8	recommended
536141555	Affx-1249078972	AX-582708705	TTGGAGGATATGTTTGAAGCAAAATTGAAGTTTCA[C/T]ATGTTCAACGTTTCAGTGAGACATTTTGGTGATCA	Y	2	1	2	1	10200	r		218	mosquito (Aedes albopictus)	chr3.75_6767572	chr3.75	6767572	T	C	standard	0.8	recommended
537333874	Affx-1249674515	AX-583897065	GTTGTTTAACTGTCGATGTTATCAAAGCGCGGCTT[G/T]CGTATCTACATATTCGGAAGGAGTTTGTTATCTTG	K	2	1	2	1	10200	r		218	mosquito (Aedes albopictus)	chr1.7_7279938	chr1.7	7279938	T	G	standard	0.8	recommended
538159081	Affx-1250203445	AX-584719261	CCTCGACGTTGTATCTTCCGAAAAGACTGATAAGA[A/G]CAACCTGATGCCAACGACGCGCTGTCCTTCACTAC	R	2	1	2	1	10200	f		218	mosquito (Aedes albopictus)	chr2.175_8794020	chr2.175	8794020	A	G	standard	0.8	recommended
537299588	Affx-1249657279	AX-583862942	AATTAACACTGCTTTGGAAGGGGAATGGCTTGCGG[A/T]ATTGGAAAACAAGTTTAAGATTATCTAATGAAAAC	W	4	1	2	1	10200	r		218	mosquito (Aedes albopictus)	chr1.67_9519206	chr1.67	9519206	T	A	standard	0.8	recommended
533215266	Affx-1250659929	AX-579833426	ATCTGAATAATTTTATTTAAAAATAGTAGTAGTGA[A/T]TCGTAGTAAATAATCGGAATACAAATTTCCGGGTA	W	4	1	2	1	10200	r		218	mosquito (Aedes albopictus)	chr2.62_215626	chr2.62	215626	T	A	standard	0.8	recommended
535285144	Affx-1251475854	AX-581869352	AACTGGTTTTGTTTACGAACGGTGCACAACGAAAC[A/G]ACGCAAAAACGGCTTCCCGCAGTCAGTGTGCGAGT	R	2	1	2	1	10200	f		218	mosquito (Aedes albopictus)	chr3.45_6205226	chr3.45	6205226	G	A	standard	0.8	recommended
537533610	Affx-1249774562	AX-584095956	CAGATGACTTTCGAAACGGGTCTGAGCCGGACGCG[C/T]GTTCAAATGATACCGCTTAATTTTAATCCTCTGTA	Y	2	1	2	1	10200	r		218	mosquito (Aedes albopictus)	chr1.85_27325110	chr1.85	27325110	C	T	standard	0.8	recommended
533880616	Affx-1250961302	AX-580495384	AATTAGTCAAATATGATTCGAGTTACATTTTAAAC[C/T]TATATTCACCCTCATGTCTACCATGCATGCCTAAA	Y	2	1	2	1	10200	f		218	mosquito (Aedes albopictus)	chr3.116_4306073	chr3.116	4306073	C	T	standard	0.8	recommended
534461294	Affx-1251184001	AX-581062426	GGAAAAGAGTACCGAATAAAAATTACATTACCATC[A/C]TTTGCTTTTCCGAACCACAAACAAAAGAAAGCCAC	M	2	1	2	1	10200	r		218	mosquito (Aedes albopictus)	chr3.166_1591359	chr3.166	1591359	A	C	standard	0.8	recommended
534041546	Affx-1251032524	AX-580653629	AAATGATGTGAATGTGACTGATTTGAAATTCATAA[A/T]CATTTCCTCGAGGTTGGATTTTTAACGGGAGAATG	W	4	1	2	1	10200	f		218	mosquito (Aedes albopictus)	chr3.136_5445236	chr3.136	5445236	A	T	standard	0.8	recommended
538336546	Affx-1250380936	AX-584896272	GGTTACATCTTAAGCCGTAATTAATGAGAATCGAA[C/G]TCGAACCTCACCCACTTCGAGCAGCATTTACGAAA	S	4	1	2	1	10200	f		218	mosquito (Aedes albopictus)	chr2.196_1659338	chr2.196	1659338	G	C	standard	0.8	recommended
537863565	Affx-1249941111	AX-584424879	GCCACTAACCGTAATATAAGTTTTACGGTAGAGAA[A/G]ATATGCCCGAAAACGCTTAGGTTTGAAGGGAAATG	R	2	1	2	1	10200	f		218	mosquito (Aedes albopictus)	chr2.107_8074936	chr2.107	8074936	G	A	standard	0.8	recommended
538191894	Affx-1250236262	AX-584751993	AACATTCGAAAATTAGAATATAACATTGACAAAAT[G/T]TAAGAGATAAAAGCAACAATAAAAGCATGTTGTTT	K	2	1	2	1	10200	f		218	mosquito (Aedes albopictus)	chr2.182_220591	chr2.182	220591	T	G	standard	0.8	recommended
535203257	Affx-1251444500	AX-581788293	AGGTACAACGACAAAGCAGCTTCATAAATAATGTT[A/C]TGTATAACTTATCTTCTAGCTTTTACAATTTATTA	M	2	1	2	1	10200	r		218	mosquito (Aedes albopictus)	chr3.39_1219112	chr3.39	1219112	C	A	standard	0.8	recommended
536087750	Affx-1249052547	AX-582655005	TTGAAAACATTGATTGAAGGCGCCAAAATTGCATA[C/T]GCTGTATCGCGAACGCAAACCATGCAGAAATTCCA	Y	2	1	2	1	10200	f		218	mosquito (Aedes albopictus)	chr3.74_4989541	chr3.74	4989541	C	T	standard	0.8	recommended
535913162	Affx-1248968829	AX-582484240	ATTAAGAGCCAAACAAATGTGTTTATACGAATATA[A/G]CAAAATGCAGAAGACTTTCCGAAGGAGATAATAAG	R	2	1	2	1	10200	f		218	mosquito (Aedes albopictus)	chr2.17_20737956	chr2.17	20737956	A	G	standard	0.8	recommended
537412779	Affx-1249716007	AX-583975512	CACCTCTTAGCGTTTCGTGTCATGCAGCAAAAGCT[A/T]ATAAACGTTTTATTCTTTTGGTGGATAGTAAAAAA	W	4	1	2	1	10200	f		218	mosquito (Aedes albopictus)	chr1.83_549625	chr1.83	549625	A	T	standard	0.8	recommended
535293771	Affx-1251478433	AX-581877863	ATTAGTTTGTATGATGCACTGAATTTACCATACGA[A/G]GAAAGAGCAAAACTGGTAAAGGAAAATTCTGTATT	R	2	1	2	1	10200	f		218	mosquito (Aedes albopictus)	chr3.45_7701655	chr3.45	7701655	G	A	standard	0.8	recommended
534717500	Affx-1251261286	AX-581309261	TTTTGACTCCATCGTTTCTCTATCAATTTACCGAA[C/T]CGGAGGCAACGCGTGCTTGCTATACCTGAAGCCAT	Y	2	1	2	1	10200	f		218	mosquito (Aedes albopictus)	chr3.170_13106844	chr3.170	13106844	C	T	standard	0.8	recommended
537735921	Affx-1249876065	AX-584297592	TGCCCCATTTTCATTTAGCTTTGTCAAGTTGACGT[A/G]TTACCATTGGTATCAGAAATCGTCAGTCCTTGACT	R	2	1	2	1	10200	r		218	mosquito (Aedes albopictus)	chr2.100_1941012	chr2.100	1941012	A	G	standard	0.8	recommended
538695609	Affx-1250224943	AX-585249357	AATGATTGGTTTCGCGATTTCTTTTTTTATTGACT[C/G]TCATTTCCATGCGCTTGCCGAAGGTTTATAAATAG	S	4	1	2	1	10200	r		218	mosquito (Aedes albopictus)	chr2.177_5567199	chr2.177	5567199	G	C	standard	0.8	recommended
534704351	Affx-1251257867	AX-581297614	TTCTTTTGGTACCCCGCCATAGAGTTTCATATTTT[C/T]CCATAATTTTACTAGATCTTCATTATTGATAGTTA	Y	2	1	2	1	10200	r		218	mosquito (Aedes albopictus)	chr3.170_11922457	chr3.170	11922457	T	C	standard	0.8	recommended
533372735	Affx-1250739909	AX-579990794	TCCATGTCGTTTAAATCTGCATATACTCAGTATGA[A/G]CTCGTGCAATCATCGTATCATATTCTCGCAGTAGT	R	2	1	2	1	10200	f		218	mosquito (Aedes albopictus)	chr2.82_20021259	chr2.82	20021259	G	A	standard	0.8	recommended
535741358	Affx-1248902725	AX-582318414	ACAAATACAAATAAGATGAACATCGTGACATTTAT[G/T]TTTTACTTAGTTTACATAATTATTTGAAGGGGCTT	K	2	1	2	1	10200	r		218	mosquito (Aedes albopictus)	chr3.70_2299904	chr3.70	2299904	T	G	standard	0.8	recommended
538019555	Affx-1250063878	AX-584580272	GGAATTGCTTGGATGAAAGTCCACAACAACAGTCA[A/T]CTCCCCATGTTGCGTTCCTGATTGTGGTTGTGATG	W	4	1	2	1	10200	f		218	mosquito (Aedes albopictus)	chr2.145_387093	chr2.145	387093	A	T	standard	0.8	recommended
538861665	Affx-1250391028	AX-585414928	GAATGCCGTCTTCCGTCGAGGCATACCCAGGTTTC[A/T]TTAATTTGACCGATTTACCTTAAGCATGGCGGTGG	W	4	1	2	1	10200	r		218	mosquito (Aedes albopictus)	chr2.196_6187112	chr2.196	6187112	T	A	standard	0.8	recommended
534791495	Affx-1251287188	AX-581380912	CATGATACCTATGGTCACGATTGAGCATAGGTAAG[C/T]TATACCTACCAGCAATTGTTGATCACCACAAGTAC	Y	2	1	2	1	10200	f		218	mosquito (Aedes albopictus)	chr3.178_1293481	chr3.178	1293481	T	C	standard	0.8	recommended
534938503	Affx-1251340799	AX-581525850	CAGCAGTACGGTGGAGTGAACGAATCTCTATCAAA[C/T]TATTCCACCCAACAGCAGCAGGGCAGTAAGCAGCA	Y	2	1	2	1	10200	f		218	mosquito (Aedes albopictus)	chr3.191_1315966	chr3.191	1315966	T	C	standard	0.8	recommended
532863500	Affx-1250484493	AX-579481832	TCGTTTGCAGATTATATTGGAGATGGACTTATTGT[A/G]ATTGCAGTCGGACTGATGATTTACGGGATTTACAA	R	2	1	2	1	10200	r		218	mosquito (Aedes albopictus)	chr2.22_7179513	chr2.22	7179513	G	A	standard	0.8	recommended
535819893	Affx-1248930259	AX-582392368	CATGGTGCGCTCTTTGGGCGTTTGCAGGAAACTTG[C/T]TGGATGAGTCGAAAGTAGGATTCGAAAAATTCCTA	Y	2	1	2	1	10200	r		218	mosquito (Aedes albopictus)	chr3.74_1538456	chr3.74	1538456	C	T	standard	0.8	recommended
538045405	Affx-1250089744	AX-584605970	AATGTGGACTAAATCAATTAATATCGAGGTAAATG[C/G]CTGGGTTCGGAGAAAGGGGATAACGGGGAAATGGA	S	4	1	2	1	10200	f		218	mosquito (Aedes albopictus)	chr2.155_3713964	chr2.155	3713964	C	G	standard	0.8	recommended
537253896	Affx-1249636622	AX-583817558	CTTTCCCATAAAGAGAGTAGTTTTGGATAAATCGA[A/C]AATGATTTTTCATAAGGGCCAAACTGACTTGATCG	M	2	1	2	1	10200	f		218	mosquito (Aedes albopictus)	chr1.59_1257290	chr1.59	1257290	C	A	standard	0.8	recommended
538101791	Affx-1250146146	AX-584662111	ATCCATCGCTCTTCTAGTCGATGTAGACGAATCAG[C/T]TAACATCTCATTTTCACCACCCAAGACACCCGTGT	Y	2	1	2	1	10200	f		218	mosquito (Aedes albopictus)	chr2.167_2201731	chr2.167	2201731	T	C	standard	0.8	recommended
535163708	Affx-1251428747	AX-581749142	ATAGTCAAAAGTGGTTGCTTAACCTTGCTTAAAGA[A/T]CCTCACCTTGAATTCCCTAGTATCCGGGAAAATTC	W	4	1	2	1	10200	f		218	mosquito (Aedes albopictus)	chr3.32_976401	chr3.32	976401	T	A	standard	0.8	recommended
536495814	Affx-1249255882	AX-583062020	CGTCCACCAAAATATCCTAAGCTCGTAAATCGGGG[C/T]TTTGATGGCGATGGTATTTATGTGTAGTACGTAGG	Y	2	1	2	1	10200	r		218	mosquito (Aedes albopictus)	chr1.10_11174928	chr1.10	11174928	C	T	standard	0.8	recommended
538550411	Affx-1250079713	AX-585104708	TATGGTGAAATAAGTATGGAGGAAACGGATGAAGA[C/T]ATTGCGCCTCGAATTGAGCGCAAGATGAGAGCCAG	Y	2	1	2	1	10200	r		218	mosquito (Aedes albopictus)	chr2.151_11254915	chr2.151	11254915	T	C	standard	0.8	recommended
534320451	Affx-1251139049	AX-580923582	CCATAACGAACAGATCTAGCAAACCACAAGTAAAA[A/C]CCAGTTATAGAACCCACACGTGAAAATACTGCTCA	M	2	1	2	1	10200	f		218	mosquito (Aedes albopictus)	chr3.16_1991002	chr3.16	1991002	A	C	standard	0.8	recommended
535474592	Affx-1248813856	AX-582056350	GAACAAAGTGGAAAACAAGTGTTTTAAAGTTGTAA[A/C]ATATGAACAAATATAAAAATATGTCTATACACACA	M	2	1	2	1	10200	f		218	mosquito (Aedes albopictus)	chr3.58_5731805	chr3.58	5731805	A	C	standard	0.8	recommended
535954695	Affx-1248985835	AX-582522223	CGCATCCCAAGAGATCCAACTTACTTACTGTGCAA[A/G]GCGGCCGTTTCCAGTCCGGGAGCGTCCTTCTTGGC	R	2	1	2	1	10200	f		218	mosquito (Aedes albopictus)	chr2.17_28813982	chr2.17	28813982	G	A	standard	0.8	recommended
536381896	Affx-1249199947	AX-582948443	CAACTTAGCCGTGCAGAAAGCCATCTAGTGAAAGT[A/G]ATATGATGAGCAGATACTTTGACTGAAAATTGAAG	R	2	1	2	1	10200	f		218	mosquito (Aedes albopictus)	chr3.9_1501417	chr3.9	1501417	G	A	standard	0.8	recommended
536182375	Affx-1249099386	AX-582749445	CAGTTTCTCTTTATCACTAACTGTCTTGGGAAGGG[G/T]TTCTCATTGTTTCACTAACGGAGCGTTTTAGTTGT	K	2	1	2	1	10200	r		218	mosquito (Aedes albopictus)	chr3.75_14186944	chr3.75	14186944	G	T	standard	0.8	recommended
535226280	Affx-1251451938	AX-581811009	CAACTAATAATGGCCCTATCGGACTAGAGTGAAAC[A/C]GTCTTCGTGACGAGAAAATAGCGATAACCATCACA	M	2	1	2	1	10200	f		218	mosquito (Aedes albopictus)	chr3.40_2523473	chr3.40	2523473	A	C	standard	0.8	recommended
533596977	Affx-1250850768	AX-580214810	GCCGCCGGTTGCACGTGGACACTTTGTTGGTCCTA[C/G]TGTCGAGCTTTTGAGTGAAGTTTTTAATGATATTC	S	4	1	2	1	10200	r		218	mosquito (Aedes albopictus)	chr2.96_33717	chr2.96	33717	G	C	standard	0.8	recommended
534291255	Affx-1251125471	AX-580894624	TAATTCCCTCTAATAGCAGTCATTTATAACAATCT[A/C]ACCGAATCCGACCAACCTGAGTCTGGCACGCGAGA	M	2	1	2	1	10200	f		218	mosquito (Aedes albopictus)	chr3.158_123107	chr3.158	123107	A	C	standard	0.8	recommended
537734592	Affx-1249876575	AX-584296268	GAACCAGTTACTCTCACTCAGCAATCAAAGAAGTA[A/G]ATATATTTCCTCAAATAGTTTATCACTCTAGAATG	R	2	1	2	1	10200	f		218	mosquito (Aedes albopictus)	chr2.100_2238168	chr2.100	2238168	G	A	standard	0.8	recommended
534360269	Affx-1251152895	AX-580962112	ATTATTATTTCCCTCACATTATTGCCATAATCAAA[A/C]TTACGGCTCGGCGCATTATATTGTTTTTGCGTTGT	M	2	1	2	1	10200	f		218	mosquito (Aedes albopictus)	chr3.16_8758329	chr3.16	8758329	A	C	standard	0.8	recommended
537282294	Affx-1249648663	AX-583845747	TGTAGGAGACATCAGGGAACGTCTGAAACTAATGT[C/T]CTTGATTTTAACAGAGTTAAACGTTCAACATCAGT	Y	2	1	2	1	10200	r		218	mosquito (Aedes albopictus)	chr1.67_2927034	chr1.67	2927034	C	T	standard	0.8	recommended
538119076	Affx-1250163436	AX-584679355	GCGCATAGCTTTAATTTAGAAGATAAAAGAAGAAC[A/G]AAAAGATAAAAACAAAAGAAACAATATAGAAATAA	R	2	1	2	1	10200	f		218	mosquito (Aedes albopictus)	chr2.17_2892607	chr2.17	2892607	A	G	standard	0.8	recommended
536534574	Affx-1249275280	AX-583100673	TTCGAATGCTTTGAGTTAAATGTACGTGACATAGG[A/C]TGACTTTGGGAATTATGGGCAAATATTTGGTCGTA	M	2	1	2	1	10200	r		218	mosquito (Aedes albopictus)	chr1.105_633425	chr1.105	633425	A	C	standard	0.8	recommended
533416331	Affx-1250760394	AX-580034364	AGGATGCTGCGTAGTGACCAACTGTTTTTCCTTTT[G/T]TGTCAGTAACGGTCCTGGCAAAAAACTCTCTATCC	K	2	1	2	1	10200	r		218	mosquito (Aedes albopictus)	chr2.87_4917920	chr2.87	4917920	T	G	standard	0.8	recommended
537927689	Affx-1249971990	AX-584488764	TGACTATCAATCTGTGCTAGGGCATTAGCGTGAAA[A/G]GCTTATCAGTCTGCGGTTTGAACATTGTGAATTTT	R	2	1	2	1	10200	r		218	mosquito (Aedes albopictus)	chr2.122_6765669	chr2.122	6765669	G	A	standard	0.8	recommended
535809765	Affx-1248926070	AX-582382374	AGAACCGGTACTGGCTCTGTAAGCAATTAATGCAA[C/G]CAAATTGTATTAGCTAGAAGATTACTAGCAAAACT	S	4	1	2	1	10200	f		218	mosquito (Aedes albopictus)	chr3.74_749709	chr3.74	749709	C	G	standard	0.8	recommended
538173717	Affx-1250218081	AX-584733868	TATCATTATTTAAAAATTGGCGATCACGCTGAAAA[A/G]AAATTCTACGAAAGAAAGTGGTTATAAACTAATGT	R	2	1	2	1	10200	f		218	mosquito (Aedes albopictus)	chr2.177_2687721	chr2.177	2687721	G	A	standard	0.8	recommended
533360297	Affx-1250732361	AX-579978359	CAGGCACACACGACGCCGGCCGAGTTGGGCAACTA[C/T]CTAGTTGTAGTTTATACCTCCCACAAGGTGACCAC	Y	2	1	2	1	10200	r		218	mosquito (Aedes albopictus)	chr2.82_17179492	chr2.82	17179492	C	T	standard	0.8	recommended
536767447	Affx-1249391656	AX-583332775	AGCTGAACTTTTATGTCATTGACTAAATTGGAATA[G/T]CAATTACTTTTAGCACACATTGCAAGAAAAGCTTA	K	2	1	2	1	10200	r		218	mosquito (Aedes albopictus)	chr1.139_8218541	chr1.139	8218541	T	G	standard	0.8	recommended
533801856	Affx-1250932547	AX-580416724	TGATATAAGATGTACAACTACCATTCTCCAAATGA[C/T]CAACAATGTGTTGGTTTTCTTCTCCTTTCGATTTG	Y	2	1	2	1	10200	f		218	mosquito (Aedes albopictus)	chr3.109_3866538	chr3.109	3866538	C	T	standard	0.8	recommended
537773894	Affx-1249896281	AX-584335431	ACAACAAGTTACTAATACTGATGATAATGATAAAA[C/T]GTCACTTATATTGGAATGTCACTGTGAGGTCCAGA	Y	2	1	2	1	10200	f		218	mosquito (Aedes albopictus)	chr2.103_3530134	chr2.103	3530134	C	T	standard	0.8	recommended
535467525	Affx-1248811501	AX-582049320	AGTGAAGATTTGATCAAGTGGATTGACCGCTTTGA[A/G]TGTGCCAATAAATTTGGCACTGGGAGTATGTACTT	R	2	1	2	1	10200	r		218	mosquito (Aedes albopictus)	chr3.58_4891847	chr3.58	4891847	A	G	standard	0.8	recommended
538292805	Affx-1250337184	AX-584852670	TTCAAAAACAACAGCTTTAATTCCATATTAAAGTA[A/G]TCAATGCGATTGCTGTTAAAAAGTTAGAATCCTGA	R	2	1	2	1	10200	f		218	mosquito (Aedes albopictus)	chr2.186_28627315	chr2.186	28627315	A	G	standard	0.8	recommended
533406234	Affx-1250755281	AX-580024271	AGAGCTCAGGGACAACCCCTTTCAGGAGTTTAGTG[G/T]AGTTCTTCCAAAGAGTCTGGGAAATGTATTTCAGG	K	2	1	2	1	10200	r		218	mosquito (Aedes albopictus)	chr2.87_2411119	chr2.87	2411119	G	T	standard	0.8	recommended
533893668	Affx-1250965588	AX-580508295	TTGATTCAGGCTGGGAATCCACATCTCTGCAAGGT[C/T]GATGAAATTCGGTGAGTATCTGAATGATTGTCACT	Y	2	1	2	1	10200	r		218	mosquito (Aedes albopictus)	chr3.116_6429499	chr3.116	6429499	C	T	standard	0.8	recommended
536521914	Affx-1249269939	AX-583088033	GATTTTCTTTCGATAAAATAGATAGATAAAGCCAA[A/T]CCAGTCGCAAGTTATGAAATCAATACTAGAAACAA	W	4	1	2	1	10200	f		218	mosquito (Aedes albopictus)	chr1.102_1626174	chr1.102	1626174	T	A	standard	0.8	recommended
537541871	Affx-1249780526	AX-584104176	TATGATCATGATTAAATGCTACCTACCACAAACTA[C/T]AAGTTATTGGCCAATGGAACAACCTCTCCCATAAT	Y	2	1	2	1	10200	f		218	mosquito (Aedes albopictus)	chr1.90_166700	chr1.90	166700	T	C	standard	0.8	recommended
536300115	Affx-1249158957	AX-582866954	TGTGGCAAATCTGGGCGTGGAATATCCATAGAAAC[C/G]AGAAGTCGTTTCTCATCATCAGATCGTTCTGCGAA	S	4	1	2	1	10200	f		218	mosquito (Aedes albopictus)	chr3.77_14908152	chr3.77	14908152	G	C	standard	0.8	recommended
533113270	Affx-1250610079	AX-579731509	AACGAAAACAACGGTATCATTACGTTAGCCAAATC[A/C]ATCGACAAAAGTCCCGGTCAGTACTACCTGATCTT	M	2	1	2	1	10200	f		218	mosquito (Aedes albopictus)	chr2.50_270587	chr2.50	270587	A	C	standard	0.8	recommended
534715149	Affx-1251261690	AX-581307626	CATACCAAAGTCGGAAAAGAAGGAAAAATAACTCG[A/G]TTTGGTTTACAGTAGGAAGGTACGAAAAATACGAT	R	2	1	2	1	10200	r		218	mosquito (Aedes albopictus)	chr3.170_13256035	chr3.170	13256035	A	G	standard	0.8	recommended
537048652	Affx-1249531985	AX-583613170	ATGAGATTTCTGATTATACATTGAGTGTATCAGTG[C/T]TGCCATAAATTCACATCTGAAATCATACGTAAGTA	Y	2	1	2	1	10200	r		218	mosquito (Aedes albopictus)	chr1.25_5466825	chr1.25	5466825	T	C	standard	0.8	recommended
538078252	Affx-1250122603	AX-584638638	AACTAATTTGAATGCCACCGAACCGTAACAATCAG[C/T]AGTGGTGCCCGTTGTGTGACATGTGGTCTCATCTG	Y	2	1	2	1	10200	f		218	mosquito (Aedes albopictus)	chr2.163_938843	chr2.163	938843	T	C	standard	0.8	recommended
533419801	Affx-1250763461	AX-580037830	TTTAAGAGCACCCAGATACCAGACGTGTAAAGAAT[A/G]AAAAAACGGAAGTTTTACCTGAAGCTCAACCAGAA	R	2	1	2	1	10200	f		218	mosquito (Aedes albopictus)	chr2.87_5995540	chr2.87	5995540	A	G	standard	0.8	recommended
533242370	Affx-1250674716	AX-579860521	AAATCGCTTCGAGAATACCTTAGACACAATAAACT[A/T]TAAACATAAAGTCAGAAAAGAAGAAACGATTAAAT	W	4	1	2	1	10200	f		218	mosquito (Aedes albopictus)	chr2.66_467579	chr2.66	467579	T	A	standard	0.8	recommended
538687456	Affx-1250216790	AX-585241228	TCACGGCACATCAACATGCATGAGGTGGCGCCTTC[C/T]TTTACCTTCTTTTATGAATGATTCAAATCTCTCCA	Y	2	1	2	1	10200	r		218	mosquito (Aedes albopictus)	chr2.177_2257992	chr2.177	2257992	T	C	standard	0.8	recommended
538051725	Affx-1250096064	AX-584612272	ACATAACACAGATGTTCTGACAGATGATTGTCAAA[A/G]GAAGGAAAGGGAGAATAAAAAAGAGCCGAAAATCT	R	2	1	2	1	10200	f		218	mosquito (Aedes albopictus)	chr2.155_6163935	chr2.155	6163935	G	A	standard	0.8	recommended
533240696	Affx-1250672625	AX-579858848	CTAACATAAACTTTTTGAGCTGCTGGAGGACTTTG[C/T]AGATGTTGTTGATAAAGGTCTGTATGTCAAACATT	Y	2	1	2	1	10200	r		218	mosquito (Aedes albopictus)	chr2.65_372303	chr2.65	372303	T	C	standard	0.8	recommended
536847029	Affx-1249432657	AX-583412122	GCTGGCGTACGATGTTTTGAGTACGATTTAGCTGA[A/T]ATGAAGGTTTGTAGCGTTGAACTATGTCTTTTATC	W	4	1	2	1	10200	f		218	mosquito (Aedes albopictus)	chr1.147_1911139	chr1.147	1911139	T	A	standard	0.8	recommended
536190003	Affx-1249103635	AX-582757063	CTCAAAGTATTGCGGAGTATCATGCATAACAATGA[C/T]CTAATTCGCAAGCGTAGATTGAATGGTGAATGTGG	Y	2	1	2	1	10200	f		218	mosquito (Aedes albopictus)	chr3.75_15411300	chr3.75	15411300	C	T	standard	0.8	recommended
536661068	Affx-1249338536	AX-583226715	GGGAAAATTTTCCAGAGGGAGTTCTTCGTTCGTTC[A/G]TTCGTTTCAATAATTGCGCAGGTCAGTTCCGTTGT	R	2	1	2	1	10202	r		218	mosquito (Aedes albopictus)	chr1.124_6525599	chr1.124	6525599	A	G	standard	0.798	recommended
533625757	Affx-1250863416	AX-580243333	TGCAAGTAGAAAAGAATAGTCATCACGCCAAGAAT[C/T]CACCACTTGCCTATATATTTGTCTTACTTTTCAGC	Y	2	1	2	1	10202	f		218	mosquito (Aedes albopictus)	chr2.97_5170376	chr2.97	5170376	T	C	standard	0.798	recommended
534227374	Affx-1251100960	AX-580832590	CGATTCATGTAGAGATGTAGACCGGAATTACTCAT[C/T]ATTCCCTATACTCTTTACTGGTATCTTAAAAGCTT	Y	2	1	2	1	10202	r		218	mosquito (Aedes albopictus)	chr3.151_2878452	chr3.151	2878452	C	T	standard	0.798	recommended
538520868	Affx-1250050155	AX-585075375	AACTTCTGACTGGTGAGTAATAATAATTAGTGTTT[C/T]TTATGAATCATGGTCTAATTATCATCAAATTTTCA	Y	2	1	2	1	10202	r		218	mosquito (Aedes albopictus)	chr2.140_19219598	chr2.140	19219598	T	C	standard	0.798	recommended
534100820	Affx-1251060959	AX-580712488	AGAGGCGCGTCTACCACAAAGTCGCGATACTTGTT[C/T]GTTACTTTGACTTGCCGCTTGGATTTGCGAGTACC	Y	2	1	2	1	10202	r		218	mosquito (Aedes albopictus)	chr3.142_3424001	chr3.142	3424001	C	T	standard	0.798	recommended
533489443	Affx-1250798227	AX-580107404	TTCACTAAGCACAGTTGTATTAGTTCGTCACTTTA[A/T]TCAAGTAAAAGTGTTTGCTCAGTTTCTTTATAGAA	W	4	1	2	1	10202	f		218	mosquito (Aedes albopictus)	chr2.87_19575930	chr2.87	19575930	A	T	standard	0.798	recommended
537575074	Affx-1249795268	AX-584137280	TCTAGAAATTCGATAATATACTGTAAGCGTCATAT[A/C]TTTAACCGCTCTGTAATATACGCGTGTTTTCTGAT	M	2	1	2	1	10202	r		218	mosquito (Aedes albopictus)	chr1.90_4018753	chr1.90	4018753	C	A	standard	0.798	recommended
537209808	Affx-1249612478	AX-583773637	TCAGCGTTCCCCCCCTCAGTCCGTTCGTCATCGAT[A/T]ATTGTGGCTAAGCCATGGCTTAAAGTCGATGTTTT	W	4	1	2	1	10202	r		218	mosquito (Aedes albopictus)	chr1.50_6883507	chr1.50	6883507	A	T	standard	0.798	recommended
533491920	Affx-1250798197	AX-580109876	GTGTTGAAACCGTCAATTTAGTTGTTCGTCATACT[C/T]GTTCATTGCAATCGTAAAAAACGGCACAAATTCAA	Y	2	1	2	1	10202	r		218	mosquito (Aedes albopictus)	chr2.87_19574340	chr2.87	19574340	T	C	standard	0.798	recommended
537238604	Affx-1249626846	AX-583802336	GTAGTTATTGTTTACACAAATATTCATACATTAGT[C/T]AAATGCTTACAAGTACCTTAAGAAAAACCTAACAA	Y	2	1	2	1	10202	r		218	mosquito (Aedes albopictus)	chr1.50_15083140	chr1.50	15083140	C	T	standard	0.798	recommended
537985073	Affx-1250029387	AX-584545933	AACTCTTGCATCGAAGCAAGATTTTATACGAGCAA[C/G]CACCAACTATAAAAGCTACAACCGTTTCCTATATA	S	4	1	2	1	10202	f		218	mosquito (Aedes albopictus)	chr2.140_9895623	chr2.140	9895623	C	G	standard	0.798	recommended
536916260	Affx-1249467327	AX-583481204	CACGTATACTAAACTTCCAATCGAATGACAATATC[A/G]AAAGGTGACAGCAATACTTTGATAAACAACTAACA	R	2	1	2	1	10202	f		218	mosquito (Aedes albopictus)	chr1.149_5704793	chr1.149	5704793	A	G	standard	0.798	recommended
538592176	Affx-1250121497	AX-585146214	ATATGTTATGGCTGAGTTCAGCGTTGTTTGGGATC[A/G]GTTTGAAGTGTTAATTTAAAAGCAAATCTTCCCAG	R	2	1	2	1	10202	r		218	mosquito (Aedes albopictus)	chr2.163_501199	chr2.163	501199	G	A	standard	0.798	recommended
537497595	Affx-1249756517	AX-584060010	TTTACTGCCATTTGGATGGGGGAACCCTGGTAGCA[A/T]CCATTTATTAGCCCTTTATGCTAACGGAAGTCAAT	W	4	1	2	1	10202	r		218	mosquito (Aedes albopictus)	chr1.85_20334389	chr1.85	20334389	T	A	standard	0.798	recommended
533851175	Affx-1250950495	AX-580465999	CGAAATCAAAATACAGTCCAATTCTAAATCGAAAT[C/T]TAAATCAAATATAAATCCAAATCTAGTCTAAACCA	Y	2	1	2	1	10202	f		218	mosquito (Aedes albopictus)	chr3.111_4332958	chr3.111	4332958	C	T	standard	0.798	recommended
536531011	Affx-1249274456	AX-583097116	CAAAGATGCGACGATTTGAAACGAGATCTCGAAAC[A/C]GACGACGTAGTGGCAATGTTTCAGAACCCCACGTC	M	2	1	2	1	10202	f		218	mosquito (Aedes albopictus)	chr1.105_491224	chr1.105	491224	A	C	standard	0.798	recommended
536682852	Affx-1249350460	AX-583248390	AAATGGGGCTTTTCTTTCTATTAATGGAATTAAGT[A/T]TATTTCAATAAACCGAACATAGGGGAAAGTTTCCC	W	4	1	2	1	10202	f		218	mosquito (Aedes albopictus)	chr1.131_2956032	chr1.131	2956032	T	A	standard	0.798	recommended
537979739	Affx-1250024047	AX-584540623	AGAACAAACAAGAAGAACAACAACAGTAAGCGAAG[A/T]AGGCAGCGACTGCCAAAATGAACGGCGATTCGAAG	W	4	1	2	1	10202	f		218	mosquito (Aedes albopictus)	chr2.140_6832271	chr2.140	6832271	A	T	standard	0.798	recommended
536706005	Affx-1249362017	AX-583271482	GGTGGCCGGTTAACTACAGTGAAAGTGAACCAGTA[A/G]CGCGCAGCAAGGAGCCTGACGAGGGTTCGGACAGT	R	2	1	2	1	10202	f		218	mosquito (Aedes albopictus)	chr1.131_10246908	chr1.131	10246908	A	G	standard	0.798	recommended
534880945	Affx-1251318559	AX-581468924	TCCGGTCGGATTAAGGTTACATACAATTGCTTTGC[C/T]TTTAATTGATACCGACGATGGTTTTCAATTTTTAT	Y	2	1	2	1	10202	r		218	mosquito (Aedes albopictus)	chr3.180_7314781	chr3.180	7314781	T	C	standard	0.798	recommended
535151891	Affx-1251424086	AX-581737455	GGATGGTGGAGGAAAATCTCTATGCCAAGATGCAA[C/G]CCCCTTGGCAATCAATCCTGATTGGTTCAGCCACA	S	4	1	2	1	10202	f		218	mosquito (Aedes albopictus)	chr3.29_7447785	chr3.29	7447785	C	G	standard	0.798	recommended
538203289	Affx-1250247658	AX-584763357	GTAAAATCTAAAACTCAAGAGAAGTATTGAAAATT[C/G]GAAAAGCAATTTCAGAATATCAACAAAAGTTTCTT	S	4	1	2	1	10202	f		218	mosquito (Aedes albopictus)	chr2.182_5614713	chr2.182	5614713	C	G	standard	0.798	recommended
534709720	Affx-1251258610	AX-581302920	GCAGATAGTCGGTATTTTATAGGAGATAGTACAAT[A/T]ATCCGGTTTTTTTCTTTTAGGACTCAGCTCAAACT	W	4	1	2	1	10202	f		218	mosquito (Aedes albopictus)	chr3.170_12036490	chr3.170	12036490	A	T	standard	0.798	recommended
538514353	Affx-1250043638	AX-585068883	AGTGTGTTTTTAACAGCATTGGTTGCGAAAGTCTT[C/T]ACTTTTGCTGCTAAACATATCACGGTCGATAACAA	Y	2	1	2	1	10202	r		218	mosquito (Aedes albopictus)	chr2.140_15649191	chr2.140	15649191	C	T	standard	0.798	recommended
533651389	Affx-1250871983	AX-580268655	ACGAGTAGTTGTAATTGTGAATGTACACCAAAACT[A/T]CTGTAATGATTATCATATATTCTTTAGGTAAGTAT	W	4	1	2	1	10202	f		218	mosquito (Aedes albopictus)	chr2.97_9053822	chr2.97	9053822	A	T	standard	0.798	recommended
535558422	Affx-1248839901	AX-582138456	ATAACAATTTCAAATTTTAGGTACACACTGAAACG[A/G]ACCGTCAATTTTTCACCTCTAACGTATTCTACTCC	R	2	1	2	1	10202	f		218	mosquito (Aedes albopictus)	chr3.66_1762415	chr3.66	1762415	A	G	standard	0.798	recommended
536207820	Affx-1249112589	AX-582774848	TTTCCACTTGTTCAATAAATCCTGCAACTCCTACA[C/T]GCACGAGTCGTCTTCGCTATTATTCACATTATTAT	Y	2	1	2	1	10202	f		218	mosquito (Aedes albopictus)	chr3.75_18418346	chr3.75	18418346	C	T	standard	0.798	recommended
537008932	Affx-1249512192	AX-583573616	GTCTATCAACAACCGTATGGAATACTGATGTCGTT[C/T]TGTCTAAGCCTTTGAATGCTAACAAATTGCAATAA	Y	2	1	2	1	10202	r		218	mosquito (Aedes albopictus)	chr1.170_1942681	chr1.170	1942681	T	C	standard	0.798	recommended
535361570	Affx-1251499752	AX-581944732	TGATTGGTCATCATTCTATTGTTGAAACTACAAAT[G/T]ATTTGTTTTTTTTTCTCTTCGACGTGTTTGGGATC	K	2	1	2	1	10202	f		218	mosquito (Aedes albopictus)	chr3.49_2386393	chr3.49	2386393	G	T	standard	0.798	recommended
537734883	Affx-1249875545	AX-584296559	ATTACTATACCGAAAAAGAGAGGGGGAAACCCGGA[A/G]TATTTCCCATCTGTTCAATCTCAGAAAGTGGAGAT	R	2	1	2	1	10202	r		218	mosquito (Aedes albopictus)	chr2.100_1667308	chr2.100	1667308	G	A	standard	0.798	recommended
537278941	Affx-1249646962	AX-583842401	ATTCCGTTTCTTTATAACCTCAACACTGTGTTTTC[A/C]ATGTCGTAGTGAGTTTATCAAATCTTTTCAATGTG	M	2	1	2	1	10202	r		218	mosquito (Aedes albopictus)	chr1.67_1162914	chr1.67	1162914	A	C	standard	0.798	recommended
535541417	Affx-1248834803	AX-582121831	ATGATTGTGATGTTTGTTGACTCTGAATTGTACTA[C/G]CTAATGCTGGTGCTGGTTGCATTTTCCTACGGTAA	S	4	1	2	1	10202	f		218	mosquito (Aedes albopictus)	chr3.66_602402	chr3.66	602402	C	G	standard	0.798	recommended
533251112	Affx-1250679077	AX-579869259	ATTAAAGCCTCGTAGATGTTAAAGCCTCGTAGATA[C/T]TAGAGCCTTAACTCACGGAAGTCGGGTGTCCTGGA	Y	2	1	2	1	10202	f		218	mosquito (Aedes albopictus)	chr2.68_1010427	chr2.68	1010427	T	C	standard	0.798	recommended
536213103	Affx-1249115249	AX-582780124	GTAGCTATTTGCTCTGTACTCAGTTTAGCATAGAA[A/G]ATGGACACCTTTTTCTTATCGTTGTCCCCGAATTG	R	2	1	2	1	10202	f		218	mosquito (Aedes albopictus)	chr3.75_19215633	chr3.75	19215633	A	G	standard	0.798	recommended
533595556	Affx-1250851094	AX-580213393	TTTATTGTATCGTTAACTTTGGTAAAACGAAGGAA[A/G]GCATTATTCGAACTGCAATTTTGGACAGGGGAGTT	R	2	1	2	1	10202	f		218	mosquito (Aedes albopictus)	chr2.96_970086	chr2.96	970086	G	A	standard	0.798	recommended
533583913	Affx-1250845280	AX-580201780	TCAGAATCGAAGGAACGACTTTTATGATTGCGAAT[A/G]AGAACAATTGAAAAACATTTTTCTCGAAAATATTT	R	2	1	2	1	10202	f		218	mosquito (Aedes albopictus)	chr2.95_3362761	chr2.95	3362761	G	A	standard	0.798	recommended
534063426	Affx-1251043079	AX-580675371	TATGATTAATTAATTTGAAATAATTCATTATTCTT[C/T]AGTTCTAATTATGTGCATTTATCTTCTCTTACAGA	Y	2	1	2	1	10202	r		218	mosquito (Aedes albopictus)	chr3.136_10523188	chr3.136	10523188	T	C	standard	0.798	recommended
533204658	Affx-1250655800	AX-579822822	CGAATGTAGAACGACTGATACTGTGCATAATAATA[A/T]ACGATCTGTGTGAGTGTTTGCTCGGTGCGCCTTCC	W	4	1	2	1	10202	f		218	mosquito (Aedes albopictus)	chr2.61_1702283	chr2.61	1702283	A	T	standard	0.798	recommended
534741367	Affx-1251270507	AX-581331460	GTTGCAATCGAAAGTAAACACGATCAGGGCAAAAT[A/G]ATTCCGGGCTTTTTGATGAAATGGTGTCGCTTGGC	R	2	1	2	1	10202	f		218	mosquito (Aedes albopictus)	chr3.170_16997260	chr3.170	16997260	A	G	standard	0.798	recommended
537182816	Affx-1249599015	AX-583746762	ACCCACGCTGTAAATCAATCATCTCCTTTTTTGTC[A/G]TTGCCTGATTTTAAAATTCCGCTCAATCATGGATA	R	2	1	2	1	10202	r		218	mosquito (Aedes albopictus)	chr1.48_844662	chr1.48	844662	G	A	standard	0.798	recommended
536642095	Affx-1249330060	AX-583207812	CCCTCACCACGGATATTGACTACATAGTATACTGA[C/T]TACTACTGACAGTTTGACACAGAAGGATAGATCAA	Y	2	1	2	1	10202	f		218	mosquito (Aedes albopictus)	chr1.124_2472332	chr1.124	2472332	C	T	standard	0.798	recommended
536272027	Affx-1249144874	AX-582838909	GAATGTCAACCGGTGTGCGCCATACTTTCAAAATA[C/T]CTTTGCGACATCCACCTAGTCGGTTATAAGGTTTT	Y	2	1	2	1	10202	f		218	mosquito (Aedes albopictus)	chr3.77_8226652	chr3.77	8226652	T	C	standard	0.798	recommended
537769266	Affx-1249892707	AX-584330810	ATAAGAATGACTTTAATGTTACGGTTGCTAAAGAA[G/T]TTTTCTAGGGAAACCACTCCGTGAATATTTTTTTT	K	2	1	2	1	10202	r		218	mosquito (Aedes albopictus)	chr2.103_2291556	chr2.103	2291556	T	G	standard	0.798	recommended
538794055	Affx-1250323404	AX-585347552	CAGACTTCAAGTAAAAAAGGTTATGCCATTTTTAC[A/C]GTTCCCAATACTAAGCTCTCAGAATTTCATTAAAA	M	2	1	2	1	10202	r		218	mosquito (Aedes albopictus)	chr2.186_24760549	chr2.186	24760549	A	C	standard	0.798	recommended
533460090	Affx-1250783633	AX-580078074	GCTCATCAAGATAATGCTTTGCTGTCGGAAGAATC[A/G]AAGTGGTGACTAACAACAAACTAACTACATACTAT	R	2	1	2	1	10202	f		218	mosquito (Aedes albopictus)	chr2.87_13753024	chr2.87	13753024	G	A	standard	0.798	recommended
537934799	Affx-1249979099	AX-584495827	CAAGGCGTTAAACCGGTTATCGTGACTAGACAAAG[C/T]GTGAGTTCTGAAGCAATGAAGTAAACGAATTGATT	Y	2	1	2	1	10202	f		218	mosquito (Aedes albopictus)	chr2.125_264108	chr2.125	264108	T	C	standard	0.798	recommended
[truncated: 173,673 more rows]

## Sheet: Summary
Scaffold name	SNP name	Position	Reference allele	Alternative allele
1.1	AX-581444870	97856	C	T
1.1	AX-583033226	161729	A	G
1.1	AX-583035067	229640	T	A
[truncated: 175,357 more rows]
