# Supplementary material for: A genotyping array for the globally invasive vector mosquito, Aedes albopictus
Source: Parasit Vectors. 2024 Mar 4;17:106. doi: 10.1186/s13071-024-06158-z (PMC10910840; doi:10.1186/s13071-024-06158-z)
Supplement: Supplementary file 21 — Additional file 21. Microsoft Excel file with the result of the segregation test. [file 13071_2024_6158_MOESM21_ESM.xlsx]

## Sheet: Results
SNP	P_Value_fam1	P_Value_fam2	P_Value_fam3	P_Value_fam4	P_Value_fam5	P_Value_fam6	Family_Count	Combined_P_Value	Adjusted_P_Value
AX-579436016						1	1	1	1
AX-579436089			0.164		0.7		2	0.363	1
AX-579436125					0.002		1	0.002	1
AX-579436149		0.355	0.14				2	0.199	1
AX-579436243	7.59e-06			0.018		1	3	1.97e-05	1
AX-579436298		1	1			1	3	1	1
AX-579436308	0.596	0.593		0.763	0.465	1	5	0.94	1
AX-579436410			0.07				1	0.07	1
AX-579436431			0.077			0.44	2	0.148	1
AX-579436508				0.875	0.739		2	0.928	1
AX-579436521	0.614	1	0.233	1	1	0.326	6	0.91	1
AX-579436526		1	0.233			0.44	3	0.602	1
AX-579436532		1				0.44	2	0.801	1
AX-579436536				0.875	0.182		2	0.452	1
AX-579436647	0.805		0.233	4.04e-04		0.695	4	0.012	1
AX-579436673				1.86e-10		1	2	4.34e-09	4.31e-04
AX-579436698	0.805			0.875			2	0.951	1
AX-579436709	0.805	0.593					2	0.83	1
AX-579436724	0.805	1	0.395	1	0.739		5	0.984	1
AX-579436772	1			4.04e-04	0.7		3	0.012	1
AX-579436775	0.805		0.233	0.786		0.695	4	0.804	1
AX-579436798		0.005	0.077			0.128	3	0.003	1
AX-579436803	1		0.233	1	1	0.704	5	0.963	1
AX-579436829		1				1	2	1	1
AX-579436866					0.683		1	0.683	1
AX-579436928		0.006					1	0.006	1
AX-579436929		0.593	0.486			1	3	0.87	1
AX-579436943		0.593	0.077			0.695	3	0.33	1
AX-579436956		1	0.233	0.875	1	0.44	5	0.903	1
AX-579436972	9.38e-07			0.782	0.021	1	4	1.76e-05	1
AX-579436978		0.593	0.395				2	0.574	1
AX-579437016		1	0.233		0.7	0.326	4	0.662	1
AX-579437021	0.805	2.13e-04				1	3	0.008	1
AX-579437032		1	0.233			0.326	3	0.524	1
AX-579437052				0.875	1		2	0.992	1
AX-579437055		1	0.233	0.875	0.7	0.326	5	0.804	1
AX-579437069	3.31e-06	0.239		0.018	1	1	5	8.14e-05	1
AX-579437083		1				1	2	1	1
AX-579437108		2.13e-04		0.875	0.096		3	0.001	1
AX-579437119		1				1	2	1	1
AX-579437122				0.03	0.318		2	0.053	1
AX-579437131		1				0.44	2	0.801	1
AX-579437132				1			1	1	1
AX-579437145	1		0.395	0.875		0.326	4	0.823	1
AX-579437154	0.563			0.041			2	0.11	1
AX-579437168			0.395			0.326	2	0.393	1
AX-579437183	1			4.04e-04	0.166		3	0.004	1
AX-579437189		0.593		0.018	8.57e-04	1	4	0.003	1
AX-579437191	0.805		0.077	0.875	1	0.44	5	0.68	1
AX-579437204		0.715					1	0.715	1
AX-579437219	0.805			1	0.739		3	0.984	1
AX-579437278	1		4.28e-06	1	0.441	0.326	5	0.001	1
AX-579437286	1			1	1	0.128	4	0.847	1
AX-579437291	0.805			0.018			2	0.077	1
AX-579437322		1		0.875	1	0.326	4	0.961	1
AX-579437346		0.553			0.292		2	0.456	1
AX-579437374		0.593		0.018	8.57e-04		3	7.45e-04	1
AX-579437393		0.593	0.395			1	3	0.821	1
AX-579437402	1	0.593	0.296	0.875		0.667	5	0.919	1
AX-579437419		0.593		0.041	0.7		3	0.228	1
AX-579437427	7.59e-06	0.593	0.077	0.018		1	5	4.21e-05	1
AX-579437467		0.593	0.395			0.282	3	0.49	1
AX-579437473	1		0.233	4.04e-04	0.054	0.695	5	0.005	1
AX-579437525	1	0.593	4.28e-06	1	0.021	0.44	6	4.44e-04	1
AX-579437536		0.593	0.395			0.326	3	0.525	1
AX-579437586	0.805	1	0.077	1	1	0.128	6	0.645	1
AX-579437618			0.233	1.38e-04	0.7	0.695	4	0.005	1
AX-579437623			0.077			0.44	2	0.148	1
AX-579437634			0.233			0.704	2	0.461	1
AX-579437642	0.805		0.233	0.875		0.695	4	0.825	1
AX-579437654		1		0.875	0.843	0.326	4	0.943	1
AX-579437655	1	0.593	0.077	1	1	0.44	6	0.799	1
AX-579437676		0.593	0.395	0.084	0.124		4	0.149	1
AX-579437701	1		0.593	4.04e-04			3	0.011	1
AX-579437729	1		0.233	2.21e-05	0.013	1	5	2.65e-04	1
AX-579437762	0.805	1	0.233	0.875		0.326	5	0.827	1
AX-579437776	0.67			0.786			2	0.864	1
AX-579437800		0.593	0.395	0.875	0.493	1	5	0.917	1
AX-579437839	0.275			1	0.7	1	4	0.915	1
AX-579437893			0.233			0.128	2	0.135	1
AX-579437949		0.593	0.077				2	0.186	1
AX-579438046		0.593	0.233	0.875	1	0.695	5	0.894	1
AX-579438061			0.233				1	0.233	1
AX-579438068		0.593	0.077			0.326	3	0.209	1
AX-579438073		0.593	0.132			0.704	3	0.446	1
AX-579438128		0.593	0.395	0.041	1	1	5	0.505	1
AX-579438155			0.039	0.258		0.103	3	0.033	1
AX-579438156		1	0.233			0.326	3	0.524	1
AX-579438213			0.039	0.041			2	0.012	1
AX-579438231	0.805	1	0.233		0.7	0.326	5	0.789	1
AX-579438248			0.039			0.593	2	0.11	1
AX-579438281		0.593	0.395			1	3	0.821	1
AX-579438285	0.805	1	0.233	1	0.739	1	6	0.984	1
AX-579438294						0.695	1	0.695	1
AX-579438329	0.805	0.593	0.395	0.875	0.7	0.326	6	0.885	1
AX-579438336	5.92e-06			0.034			2	3.28e-06	0.314
AX-579438347		1				1	2	1	1
AX-579438391					0.7	0.695	2	0.837	1
AX-579438435			0.077			0.326	2	0.117	1
AX-579438492	0.805		0.395	0.875	0.505	0.252	5	0.755	1
AX-579438566	7.59e-06				1		2	9.70e-05	1
AX-579438607		0.593		0.875	0.739		3	0.927	1
AX-579438621	0.805	1	0.077	0.521	1		5	0.738	1
AX-579438797				0.875	0.739	1	3	0.99	1
AX-579438813			0.077	0.875	0.739	0.326	4	0.41	1
AX-579438816			0.233		0.7	1	3	0.727	1
AX-579438834	0.805	0.593	0.077	1	1	0.326	6	0.716	1
AX-579438851			0.14			1	2	0.416	1
AX-579438864					1		1	1	1
AX-579438868			0.395			0.44	2	0.478	1
AX-579438919			0.077	0.875	0.7	0.326	4	0.4	1
AX-579438947	3.77e-07	0.465	0.213	1	1	0.326	6	2.74e-04	1
AX-579438972			0.395			1	2	0.762	1
AX-579438982			0.077		1	1	3	0.527	1
AX-579438988			7.93e-07		0.239		2	3.13e-06	0.299
AX-579438989	0.002		0.233	0.563	0.7	0.695	5	0.047	1
AX-579439006		1	1.09e-06			0.704	3	8.77e-05	1
AX-579439027						0.593	1	0.593	1
AX-579439046	1		0.395	1	0.7	1	5	0.99	1
AX-579439055	1		4.28e-06	0.875		0.44	4	8.18e-04	1
AX-579439070		0.859	0.233	0.875	0.7	1	5	0.938	1
AX-579439125		0.593	0.077			0.704	3	0.332	1
AX-579439154	0.901			0.875	1		3	0.998	1
AX-579439194		0.859	0.233			1	3	0.781	1
AX-579439220		0.593	0.077	0.875		0.326	4	0.37	1
AX-579439328		0.593	0.395		0.124		3	0.313	1
AX-579439401		0.593	0.077			0.593	3	0.301	1
AX-579439444				0.637	0.045	1	3	0.313	1
AX-579439450		0.213	0.233				2	0.198	1
AX-579439460						1	1	1	1
AX-579439462	0.805						1	0.805	1
AX-579439473	0.052	0.213	0.395	0.276	0.045	1	6	0.075	1
AX-579439570	0.219	0.109		0.875	1		4	0.459	1
AX-579439622	0.122	0.19	0.213	0.233			4	0.095	1
AX-579439682	0.136			1	0.739		3	0.596	1
AX-579439695	0.219			0.875	1		3	0.769	1
AX-579439703		0.031	0.039	0.174	0.318	0.593	5	0.027	1
AX-579439777	7.89e-17	0.206	0.14	0.041	1		5	1.58e-14	1.59e-09
AX-579439783	0.623		0.395				2	0.591	1
AX-579439795	1	0.593		1	1	1	5	1	1
AX-579439801	1	0.593		0.875	0.843	1	5	0.998	1
AX-579439825	0.136		0.077	1	1	1	5	0.52	1
AX-579439828					0.739		1	0.739	1
AX-579439894	0.522	0.758		0.414	0.441		4	0.73	1
AX-579440002	0.805			1	0.843		3	0.993	1
AX-579440023			0.61		0.7	1	3	0.945	1
AX-579440052	0.219	0.758	0.395	1	1	1	6	0.941	1
AX-579440114			0.395			1	2	0.762	1
AX-579440118						1	1	1	1
AX-579440148			0.233			0.704	2	0.461	1
AX-579440149	0.219	0.593	0.864	0.875	0.739		5	0.874	1
AX-579440157	0.239		0.077		1	1	4	0.434	1
AX-579440159	0.136	0.758	0.077	1	1	1	6	0.644	1
AX-579440170			0.137				1	0.137	1
AX-579440199	0.263	0.213		1	1		4	0.673	1
AX-579440217	1.69e-06			0.782	1		3	1.40e-04	1
AX-579440229	0.533		0.233	0.875		1	4	0.816	1
AX-579440233	0.219			0.875	1		3	0.769	1
AX-579440234	0.805	0.859	0.077	0.875	0.739	0.695	6	0.825	1
AX-579440294	0.522	0.109	0.395	0.414	0.441	1	6	0.53	1
AX-579440319	1		0.077	0.875		0.326	4	0.469	1
AX-579440337	0.805			0.875	1	0.695	4	0.994	1
AX-579440342		0.553					1	0.553	1
AX-579440364		0.109	0.395				2	0.178	1
AX-579440397			0.233	0.875	0.054	0.695	4	0.284	1
AX-579440402	0.263	0.124		0.777	1		4	0.499	1
AX-579440444	1			1	0.7		3	0.994	1
AX-579440447	1	0.213	0.077	0.875		0.695	5	0.511	1
AX-579440469		0.758		0.432	0.7	0.695	4	0.885	1
AX-579440476	0.383				0.124		2	0.192	1
AX-579440537	1			0.414	0.441		3	0.757	1
AX-579440550				0.432	0.7	1	3	0.88	1
AX-579440558	0.522			0.414	0.441		3	0.583	1
AX-579440584	0.805	0.593		0.343			3	0.728	1
AX-579440639	0.623	0.213	0.395			1	4	0.658	1
AX-579440744	0.024	1.47e-05	1.62e-04	0.396		0.593	5	2.55e-07	0.025
AX-579440843			0.61	0.432	0.7	1	4	0.908	1
AX-579440878		0.758	0.395	0.432	0.7	1	5	0.904	1
AX-579440898			0.164	0.432	0.7	1	4	0.646	1
AX-579440947	0.801						1	0.801	1
AX-579440949	0.623	0.213	0.395			1	4	0.658	1
AX-579440978	0.033	0.031	0.07	0.174	0.318		5	0.006	1
AX-579440983			0.395				1	0.395	1
AX-579441126	0.302	0.34		0.373			3	0.367	1
AX-579441142	0.522		0.064	0.414	0.441		4	0.251	1
AX-579441178			0.233				1	0.233	1
AX-579441308	1	0.758		0.875			3	0.991	1
AX-579441337				0.87	1		2	0.991	1
AX-579441388	0.623		0.864				2	0.872	1
AX-579441421			0.395				1	0.395	1
AX-579441497	0.219			0.875	1		3	0.769	1
AX-579441521	0.219			0.875	5.32e-04		3	0.005	1
AX-579441533	0.524		6.03e-05	0.253			3	6.52e-04	1
AX-579441549	0.522	0.213	0.077	0.875	1	1	6	0.634	1
AX-579441576	0.208		0.077	0.414	0.029		4	0.029	1
AX-579441581		0.758	0.395			1	3	0.878	1
AX-579441622		0.109	0.395				2	0.178	1
AX-579441679			0.233	0.432	0.7	0.695	4	0.644	1
AX-579441703	0.524						1	0.524	1
AX-579441707						1	1	1	1
AX-579441765				0.174	0.505		2	0.301	1
AX-579441803	0.623		0.233	0.587	0.7		4	0.688	1
AX-579441919	0.623	0.758	0.077	0.432	0.7	1	6	0.701	1
AX-579441927	0.393	0.031	0.14	0.174	0.505		5	0.062	1
AX-579442008		0.758	0.077			1	3	0.459	1
AX-579442012		0.213					1	0.213	1
AX-579442015	0.219		0.395	0.414	0.441		4	0.405	1
AX-579442031		0.758					1	0.758	1
AX-579442042	0.219	0.758	0.395	0.414	0.441		5	0.546	1
AX-579442050	0.219	0.758		0.875	1		4	0.869	1
AX-579442327						1	1	1	1
AX-579442361		0.752				1	2	0.966	1
AX-579442483				0.174	0.318		2	0.215	1
AX-579442487	0.522	0.273	0.164	0.414	0.441		5	0.364	1
AX-579442504	4.89e-08			0.851	4.07e-04	1	4	4.87e-08	0.005
AX-579442505	0.623			0.875			2	0.876	1
AX-579442560	0.219			0.414	0.441		3	0.375	1
AX-579442664	0.219			1	1		3	0.804	1
AX-579442808			0.045	0.432			2	0.097	1
AX-579442934	0.219			0.432	0.441	1	4	0.607	1
AX-579443011	0.033			0.174	0.182		3	0.033	1
AX-579443092		0.109	0.233				2	0.119	1
AX-579443168				0.174	0.021		2	0.024	1
AX-579443172		0.213	0.018			1	3	0.085	1
AX-579443193		0.213	0.077			1	3	0.222	1
AX-579443224	0.219		0.008	1	1		4	0.122	1
AX-579443241		0.109	0.233	0.432	0.7	1	5	0.464	1
AX-579443306			0.213	0.739	0.292		3	0.405	1
AX-579443338						1	1	1	1
AX-579443353			0.864				1	0.864	1
AX-579443379	1			0.875			2	0.992	1
AX-579443410	0.219	0.843	0.213		0.016		4	0.065	1
AX-579443446	0.219	2.13e-04	0.008	0.432	0.441		5	2.79e-04	1
AX-579443447		0.758					1	0.758	1
AX-579443479		0.005					1	0.005	1
AX-579443506		0.758	0.077			1	3	0.459	1
AX-579443507		0.213	0.077	0.432	0.7	1	5	0.388	1
AX-579443554	0.219	0.213		0.432	0.441	1	5	0.49	1
AX-579443570						1	1	1	1
AX-579443583		0.213	0.233				2	0.198	1
AX-579443602	0.219		0.077	0.875	1		4	0.392	1
AX-579443604	0.219			0.432	0.7		3	0.49	1
AX-579443612		0.213					1	0.213	1
AX-579443643		0.186					1	0.186	1
AX-579443786	0.136	0.006		1	1	1	5	0.164	1
AX-579443845			0.233			1	2	0.573	1
AX-579443938			0.395			1	2	0.762	1
AX-579444238		0.758	0.864	0.142	0.7	0.593	5	0.77	1
AX-579444301	0.324		0.395	0.084	0.441	1	5	0.381	1
AX-579444315		0.349	0.068				2	0.112	1
AX-579444378			0.395		0.322	1	3	0.66	1
AX-579444395	1	0.213		0.875			3	0.762	1
AX-579444397				0.432	0.7		2	0.664	1
AX-579444406		0.758	0.233	0.432	0.7		4	0.663	1
AX-579444414			0.395	0.521	0.553		3	0.63	1
AX-579444416	1	0.213		0.875		1	4	0.909	1
AX-579444421	1	0.109	0.077	0.587	0.7		5	0.331	1
AX-579444436		0.758	0.077			1	3	0.459	1
AX-579444440	0.219	0.213		1	1	1	5	0.803	1
AX-579444442	0.136	0.213		0.432	0.553	1	5	0.444	1
AX-579444453		0.758	0.077			1	3	0.459	1
AX-579444482		0.213					1	0.213	1
AX-579444553		0.028	0.077				2	0.016	1
AX-579444554	0.287		0.395	0.875	1	0.236	5	0.677	1
AX-579444622		0.068					1	0.068	1
AX-579444635		0.213				1	2	0.542	1
AX-579444700	8.61e-09						1	8.61e-09	8.53e-04
AX-579444740			0.864				1	0.864	1
AX-579444809		6.71e-04					1	6.71e-04	1
AX-579444866	0.219	0.758	0.233	0.875	1		5	0.746	1
AX-579444938	0.219		0.077	0.875	1	1	5	0.586	1
AX-579444944	0.263	0.109	0.077	0.875	1	1	6	0.406	1
AX-579444950		0.213	0.077				2	0.084	1
AX-579444953	0.486					0.44	2	0.544	1
AX-579445102	0.805					0.593	2	0.83	1
AX-579445128	0.805	1	0.233	0.174			4	0.553	1
AX-579445188	0.805						1	0.805	1
AX-579445195					0.322	1	2	0.687	1
AX-579445255		0.213				1	2	0.542	1
AX-579445328	0.287			0.739	0.013		3	0.068	1
AX-579445462		0.213				0.593	2	0.387	1
AX-579445491		0.023		0.786	4.38e-07		3	1.54e-06	0.148
AX-579445523		0.213				1	2	0.542	1
AX-579445592				0.786	0.002		2	0.013	1
AX-579445606		0.606	0.126			0.252	3	0.245	1
AX-579445740			4.79e-04				1	4.79e-04	1
AX-579445784	0.01	0.031					2	0.003	1
AX-579445809					0.002		1	0.002	1
AX-579445930		0.006					1	0.006	1
AX-579445953		0.001					1	0.001	1
AX-579445994	8.20e-05	0.213	0.395	0.083	0.02	1	6	2.59e-04	1
AX-579446023		0.031	0.039				2	0.009	1
AX-579446061			0.395			1	2	0.762	1
AX-579446348		1.83e-04	1				2	0.002	1
AX-579446406		3.29e-08					1	3.29e-08	0.003
AX-579446426		0.213	0.233			1	3	0.422	1
AX-579446453		1	0.233			1	3	0.82	1
AX-579446460						1	1	1	1
AX-579446575	0.517						1	0.517	1
AX-579446593					0.333		1	0.333	1
AX-579446663		0.213				0.593	2	0.387	1
AX-579446677	0.901	0.213	0.296		0.503	1	5	0.715	1
AX-579446880		1	0.296	0.174		1	4	0.654	1
AX-579446915	0.805			0.174	0.441	1	4	0.695	1
AX-579446949		1.56e-05	0.395				2	8.01e-05	1
AX-579446953		0.144	0.395	0.018			3	0.033	1
AX-579446973			0.395				1	0.395	1
AX-579446985			0.233				1	0.233	1
AX-579446996	0.264			0.083	0.02	0.593	4	0.035	1
AX-579447023		0.213	0.395			1	3	0.55	1
AX-579447083	0.383		0.724	0.875	0.441	0.236	5	0.692	1
AX-579447096	0.01			0.87	1	0.44	4	0.2	1
AX-579447134			0.724	0.174	0.441	1	4	0.671	1
AX-579447141	0.287			0.875	1		3	0.837	1
AX-579447146			0.684	0.61			2	0.781	1
AX-579447193	0.709	0.213	0.395			1	4	0.687	1
AX-579447199	0.026			0.03			2	0.006	1
AX-579447230	0.805			0.165	0.441		3	0.461	1
AX-579447235				0.018		1	2	0.092	1
AX-579447369	0.517	1.56e-05	0.077			0.44	4	1.93e-04	1
AX-579447434		1.56e-05	0.077			1	3	1.29e-04	1
AX-579447466					0.248		1	0.248	1
AX-579447534		0.213				1	2	0.542	1
AX-579447628						1	1	1	1
AX-579447631		0.213	0.233			0.44	3	0.265	1
AX-579447643		1.56e-05	0.233			0.44	3	1.66e-04	1
AX-579447661	0.201			0.003	0.182	0.006	4	3.57e-04	1
AX-579447691		0.213	0.395			1	3	0.55	1
AX-579447723		1	0.077			1	3	0.527	1
AX-579447727		1	0.068			1	3	0.496	1
AX-579447749				0.174			1	0.174	1
AX-579447767	0.473	1.83e-04	1			1	4	0.016	1
AX-579447784		1.56e-05	0.077				2	1.76e-05	1
AX-579447811			0.069				1	0.069	1
AX-579447828		0.213				0.593	2	0.387	1
AX-579447992		0.373	0.864	0.355			3	0.631	1
AX-579448052	8.60e-08		0.166	0.002	5.32e-04		4	1.01e-10	1.01e-05
AX-579448104		1				1	2	1	1
AX-579448160						0.593	1	0.593	1
AX-579448182		0.213				1	2	0.542	1
AX-579448372						0.236	1	0.236	1
AX-579448375	0.805						1	0.805	1
AX-579448413		0.213					1	0.213	1
AX-579448423	0.522			0.027			2	0.073	1
AX-579448427				0.174			1	0.174	1
AX-579448479		0.213	0.233			1	3	0.422	1
AX-579448649		0.031	0.14		0.002	0.593	4	0.002	1
AX-579448662						1	1	1	1
AX-579448686		0.213					1	0.213	1
AX-579448699		0.213	0.395			1	3	0.55	1
AX-579448732		0.213				1	2	0.542	1
AX-579448774		0.114	0.61				2	0.255	1
AX-579448776	0.486		0.395			1	3	0.77	1
AX-579448822		0.213	0.395				2	0.292	1
AX-579448982	0.287	0.213	0.395	0.084	1	1	6	0.413	1
AX-579449010		0.213					1	0.213	1
AX-579449120		0.031	0.395	0.018			3	0.01	1
AX-579449134		1	0.077	0.018		1	4	0.108	1
AX-579449164			0.395			1	2	0.762	1
AX-579449201	0.324	0.213		0.084	1		4	0.244	1
AX-579449205	0.522	0.213			0.054	1	4	0.25	1
AX-579449216		1	0.077				2	0.274	1
AX-579449231	0.146			0.396	0.027		3	0.045	1
AX-579449248	1.08e-04			2.21e-05	0.021		3	1.52e-08	0.002
AX-579449253			5.04e-04			0.593	2	0.003	1
AX-579449254		1	0.077			1	3	0.527	1
AX-579449271	0.623			0.174	0.441	1	4	0.638	1
AX-579449274		0.44	0.058			1	3	0.29	1
AX-579449304		1	0.077			1	3	0.527	1
AX-579449332	0.805	1	0.233	0.174		1	5	0.74	1
AX-579449350		1	0.077			1	3	0.527	1
AX-579449389		0.213	0.077			1	3	0.222	1
AX-579449513						1	1	1	1
AX-579449522					0.008		1	0.008	1
AX-579449539	0.287			0.875	1		3	0.837	1
AX-579449559	0.287			0.875	0.441	1	4	0.819	1
AX-579449596	0.287	0.213	0.233	0.875	1	1	6	0.722	1
AX-579449623	0.01			0.875	5.32e-04		3	4.30e-04	1
AX-579449678						1	1	1	1
AX-579449695		1	0.077			1	3	0.527	1
AX-579449714		1.56e-05	0.077			1	3	1.29e-04	1
AX-579449882	0.324	0.213		0.875	0.02		4	0.096	1
AX-579449904						1	1	1	1
AX-579449953	0.805	1	0.233	0.174	0.441	1	6	0.746	1
AX-579449966					0.441		1	0.441	1
AX-579449984		1	0.077			1	3	0.527	1
AX-579449988		0.213				1	2	0.542	1
AX-579450001						1	1	1	1
AX-579450018		0.213		0.786			2	0.466	1
AX-579450089	0.486	1	0.228	2.21e-05			4	0.001	1
AX-579450101						0.593	1	0.593	1
AX-579450104	0.281				0.441	0.236	3	0.315	1
AX-579450154			1			0.704	2	0.951	1
AX-579450200						1	1	1	1
AX-579450228	0.324			0.084	0.441	1	4	0.355	1
AX-579450238		0.213	0.233			0.593	3	0.316	1
AX-579450263			0.724			1	2	0.958	1
AX-579450271				0.092	0.014		2	0.01	1
AX-579450282						0.252	1	0.252	1
AX-579450296	0.324			0.046	0.248		3	0.082	1
AX-579450352	0.239			0.875	0.045	1	4	0.317	1
AX-579450357	0.088			0.003	0.182		3	0.003	1
AX-579450391	0.801				0.124	0.44	3	0.394	1
AX-579450439	0.001	0.213	0.233	0.018		1	5	0.002	1
AX-579450446	0.383		0.395	0.875	1	1	5	0.945	1
AX-579450447	0.805		0.395		0.441	1	4	0.863	1
AX-579450448	0.287			0.875	1		3	0.837	1
AX-579450450				0.018			1	0.018	1
AX-579450486	0.805	0.213	0.233			1	4	0.598	1
AX-579450584	8.20e-05	1		0.084	0.045		4	2.15e-04	1
AX-579450601	0.805	1	0.077		0.248	1	5	0.595	1
AX-579450650	0.281	0.273		1	0.465	1	5	0.757	1
AX-579450711				0.174			1	0.174	1
AX-579450729						1	1	1	1
AX-579450734		1	0.395			0.44	3	0.744	1
AX-579450789	0.324	0.213		0.084	0.248	1	5	0.218	1
AX-579450808	0.805					1	2	0.98	1
AX-579450860	0.324			0.233	0.248		3	0.242	1
AX-579450882		1	0.486			0.667	3	0.895	1
AX-579450899			0.724	0.018		0.44	3	0.113	1
AX-579450922	0.287	0.213		0.875	1	1	5	0.826	1
AX-579450951		1	0.077			0.593	3	0.404	1
AX-579450965	0.324			0.084	0.248		3	0.125	1
AX-579451136					0.289		1	0.289	1
AX-579451175	0.393			2.21e-05	7.74e-09	0.593	4	2.16e-10	2.16e-05
AX-579451295		0.213		0.174	0.248		3	0.153	1
AX-579451302	0.324			0.875	0.248	1	4	0.724	1
AX-579451358			0.806				1	0.806	1
AX-579451365		0.144	0.031			0.44	3	0.052	1
AX-579451500	0.324			0.084	0.248	1	4	0.265	1
AX-579451501	0.383			0.084	0.248		3	0.14	1
AX-579451566						0.236	1	0.236	1
AX-579451615				0.144	0.027		2	0.026	1
AX-579451653	0.45				0.322		2	0.425	1
AX-579451664				0.004	8.58e-05		2	5.32e-06	0.506
AX-579451711		0.213		0.174		1	3	0.359	1
AX-579451720	0.805				0.248	1	3	0.781	1
AX-579451741		1	0.233	0.875	0.077	1	5	0.599	1
AX-579451780	0.287			0.084	1		3	0.28	1
AX-579451826	0.023	1	0.077	0.875	0.045	1	6	0.086	1
AX-579451830				0.055			1	0.055	1
AX-579451897	0.805	1	0.14	0.174	0.248	1	6	0.559	1
AX-579451989	0.324			0.109	0.322	0.593	4	0.266	1
AX-579452034		1	0.233			0.593	3	0.683	1
AX-579452047	0.805	0.758	0.233	0.174	0.248	1	6	0.599	1
AX-579452084						1	1	1	1
AX-579452094	0.049			0.126			2	0.037	1
AX-579452110	0.001	0.213		0.018	6.34e-05	1	5	3.89e-06	0.371
AX-579452117	0.805	1	0.077		0.248		4	0.4	1
AX-579452152		0.213				0.667	2	0.419	1
AX-579452176		1	0.077			1	3	0.527	1
AX-579452204				0.786			1	0.786	1
AX-579452230		0.213	0.077				2	0.084	1
AX-579452294	0.287			0.875	1		3	0.837	1
AX-579452322	0.383			0.084	0.248		3	0.14	1
AX-579452375	0.287		0.213	0.084	1	1	5	0.393	1
AX-579452450			0.395			1	2	0.762	1
AX-579452504	0.324			0.084	0.248		3	0.125	1
AX-579452522					0.248	1	2	0.594	1
AX-579452597	0.324	1	0.077	0.084	0.248	1	6	0.235	1
AX-579452664		0.213				1	2	0.542	1
AX-579452690		0.48		0.01	0.005		3	0.002	1
AX-579452703	0.324	0.213		0.084	0.248	1	5	0.218	1
AX-579452728						1	1	1	1
AX-579452761	0.287			0.084	1		3	0.28	1
AX-579452763	0.805				0.248		2	0.522	1
AX-579452784		0.213					1	0.213	1
AX-579452799		0.213		0.875	0.248	1	4	0.63	1
AX-579452853						1	1	1	1
AX-579452872						1	1	1	1
AX-579452881		1	0.077				2	0.274	1
AX-579452903	0.002	0.273			3.86e-05		3	3.46e-06	0.33
AX-579453040		0.213				1	2	0.542	1
AX-579453041		0.213				1	2	0.542	1
AX-579453078				0.018		1	2	0.092	1
AX-579453152	0.281			0.014	1		3	0.084	1
AX-579453181	0.324	0.213	0.077	0.027	0.248	1	6	0.058	1
AX-579453285		0.213				0.593	2	0.387	1
AX-579453292		1.56e-05	0.296				2	6.14e-05	1
AX-579453335		0.213	0.233			1	3	0.422	1
AX-579453398		1	0.077			1	3	0.527	1
AX-579453437						1	1	1	1
AX-579453471						1	1	1	1
AX-579453475	0.324	1	0.077	0.875	0.248	1	6	0.578	1
AX-579453620	0.502			0.875	0.248		3	0.618	1
AX-579453766						1	1	1	1
AX-579453867		1	0.233			1	3	0.82	1
AX-579453994	0.324	0.213		0.084	0.248		4	0.109	1
AX-579454026		1	0.077			1	3	0.527	1
AX-579454128	0.001				6.34e-05		2	1.51e-06	0.145
AX-579454155		1	0.077			1	3	0.527	1
AX-579454264	0.287	0.213	0.395	0.084	1		5	0.258	1
AX-579454444						0.593	1	0.593	1
AX-579454553			0.395			1	2	0.762	1
AX-579454582				0.018		0.564	2	0.058	1
AX-579454652		1.56e-05	0.233			0.44	3	1.66e-04	1
AX-579454785			0.395				1	0.395	1
AX-579454818		0.213					1	0.213	1
AX-579454903		0.213				1	2	0.542	1
AX-579454985	5.67e-04	1	0.233	0.083	0.248		5	0.004	1
AX-579455383		0.213				1	2	0.542	1
AX-579455700		1	0.077			1	3	0.527	1
AX-579455724	0.287		0.395	0.875	0.045		4	0.213	1
AX-579455862		1	0.077	2.21e-05		1	4	8.38e-04	1
AX-579455876		1.56e-05	0.077			1	3	1.29e-04	1
AX-579455935		0.213				1	2	0.542	1
AX-579455943	0.287	0.213	0.077	0.875	1	1	6	0.529	1
AX-579456512	0.486	0.213	0.395	2.21e-05		1	5	0.002	1
AX-579456528						0.4	1	0.4	1
AX-579456550				0.027			1	0.027	1
AX-579456574	0.805			2.21e-05			2	2.12e-04	1
AX-579456597			0.077			1	2	0.274	1
AX-579456609	0.522		0.14		0.002	0.593	4	0.018	1
AX-579456690				0.025			1	0.025	1
AX-579456749	0.026	0.144	0.395	0.875	1		5	0.208	1
AX-579456931		1	0.077			1	3	0.527	1
AX-579456936			0.077	0.174			2	0.071	1
AX-579456948		0.031					1	0.031	1
AX-579456978		0.213		0.174	0.248	1	4	0.311	1
AX-579457077	8.20e-05	1	0.077	0.084	0.248	1	6	0.002	1
AX-579457176	0.805	0.213		0.174		1	4	0.533	1
AX-579457237		0.213	0.077	0.174		1	4	0.164	1
AX-579457390	0.088			2.21e-05	0.002	0.098	4	6.22e-07	0.06
AX-579457498		1	0.077			1	3	0.527	1
AX-579457558		0.273	0.07		0.248	1	4	0.22	1
AX-579457779						1	1	1	1
AX-579457834						1	1	1	1
AX-579457982		0.213	0.213				2	0.185	1
AX-579458027			0.395				1	0.395	1
AX-579458172		0.213	0.039			0.593	3	0.1	1
AX-579458208		0.213	0.077			0.593	3	0.159	1
AX-579458535		1	0.077			1	3	0.527	1
AX-579458551		1.56e-05	0.077			1	3	1.29e-04	1
AX-579458589		1	0.395			0.236	3	0.577	1
AX-579458654	0.637					1	2	0.924	1
AX-579458931	1		0.077			1	3	0.527	1
AX-579459034					0.248		1	0.248	1
AX-579459045	0.324	1	0.077	0.875	1	1	6	0.812	1
AX-579459112		0.031				1	2	0.138	1
AX-579459119					0.124	1	2	0.382	1
AX-579459140					0.248		1	0.248	1
AX-579459157		0.031	0.14			0.593	3	0.063	1
AX-579459181					0.186		1	0.186	1
AX-579459271			0.395				1	0.395	1
AX-579459401					0.248		1	0.248	1
AX-579459430					0.248		1	0.248	1
AX-579459490						0.182	1	0.182	1
AX-579459502		0.213	0.233			1	3	0.422	1
AX-579459504		1	0.077			1	3	0.527	1
AX-579459515	8.20e-05			0.875	1		3	0.004	1
AX-579459523					0.248		1	0.248	1
AX-579459562		1.56e-05	0.233			1	3	3.35e-04	1
AX-579459790			0.395			0.593	2	0.574	1
AX-579459832	0.001						1	0.001	1
AX-579460013	0.614						1	0.614	1
AX-579460061	0.281	1	0.233	2.21e-05	7.74e-09	1	6	3.76e-09	3.74e-04
AX-579460238	0.001			0.018	6.34e-05		3	3.64e-07	0.035
AX-579460357	0.805						1	0.805	1
AX-579460400					0.248	1	2	0.594	1
AX-579460411					0.248		1	0.248	1
AX-579460450				0.414	5.69e-06		2	3.29e-05	1
AX-579460491				0.164	0.4		2	0.244	1
AX-579460625		0.213	0.005				2	0.009	1
AX-579460690	8.20e-05			0.041	1		3	3.13e-04	1
AX-579460730		0.031	0.039			0.593	3	0.025	1
AX-579460807		0.213	0.395		0.02	1	4	0.118	1
AX-579460902	0.486						1	0.486	1
AX-579460931		0.031				1	2	0.138	1
AX-579460950					0.248		1	0.248	1
AX-579461056	0.287	0.213		0.875	1	1	5	0.826	1
AX-579461127		1	0.077			1	3	0.527	1
AX-579461185		0.213	0.395			1	3	0.55	1
AX-579461206					0.7		1	0.7	1
AX-579461207			0.395			1	2	0.762	1
AX-579461221					0.441	1	2	0.802	1
AX-579461271						1	1	1	1
AX-579461281	0.219			0.084	0.045		3	0.028	1
AX-579461309					2.61e-04		1	2.61e-04	1
AX-579461367						1	1	1	1
AX-579461395					0.34		1	0.34	1
AX-579461404		1	0.077			1	3	0.527	1
AX-579461427			0.395		0.248	1	3	0.59	1
AX-579461462		0.213	0.233		0.166	1	4	0.294	1
AX-579461559		0.394	0.046				2	0.09	1
AX-579461721				0.174			1	0.174	1
AX-579461753					0.002		1	0.002	1
AX-579461783	0.805						1	0.805	1
AX-579461818					0.248		1	0.248	1
AX-579461838						1	1	1	1
AX-579461882					0.843		1	0.843	1
AX-579461964					1.62e-04		1	1.62e-04	1
AX-579461973					0.124	0.252	2	0.139	1
AX-579462016	0.647			0.875			2	0.888	1
AX-579462039						0.252	1	0.252	1
AX-579462096	0.324			0.084	5.32e-04		3	0.001	1
AX-579462195		0.213					1	0.213	1
AX-579462197		0.213	0.233			1	3	0.422	1
AX-579462206					0.248		1	0.248	1
AX-579462236		0.031					1	0.031	1
AX-579462318		0.213					1	0.213	1
AX-579462440		0.031					1	0.031	1
AX-579462491	0.642						1	0.642	1
AX-579462501				2.21e-05			1	2.21e-05	1
AX-579462508						1	1	1	1
AX-579462558		0.213				1	2	0.542	1
AX-579462607					0.248		1	0.248	1
AX-579462672					0.248		1	0.248	1
AX-579462713		1	0.077			1	3	0.527	1
AX-579462720		0.213					1	0.213	1
AX-579462810	0.805			0.174			2	0.415	1
AX-579462886	0.324			0.875	1		3	0.866	1
AX-579462953	0.486	0.213					2	0.338	1
AX-579462985	0.287			0.414	1		3	0.641	1
AX-579463000					0.023		1	0.023	1
AX-579463006	0.45			0.084	1		3	0.364	1
AX-579463030		1	0.233			1	3	0.82	1
AX-579463053		0.144					1	0.144	1
AX-579463068		0.213	0.07			1	3	0.21	1
AX-579463086		0.213	0.077			1	3	0.222	1
AX-579463106	0.324	0.349		0.084			3	0.156	1
AX-579463145					0.248		1	0.248	1
AX-579463161	0.79	0.553		0.414	1		4	0.905	1
AX-579463216		0.031			0.045		2	0.011	1
AX-579463231		0.213					1	0.213	1
AX-579463247		0.213	0.233			1	3	0.422	1
AX-579463269		0.213				0.593	2	0.387	1
AX-579463286		0.031	0.14	0.174			3	0.026	1
AX-579463333		0.213	0.395			1	3	0.55	1
AX-579463347		0.213					1	0.213	1
AX-579463351		0.213					1	0.213	1
AX-579463387		0.213	0.395			1	3	0.55	1
AX-579463414		0.213					1	0.213	1
AX-579463445	0.324	0.213		0.084	0.248		4	0.109	1
AX-579463494		0.213					1	0.213	1
AX-579463498		0.213					1	0.213	1
AX-579463550		0.213					1	0.213	1
AX-579463582			1			0.236	2	0.577	1
AX-579463587		1	0.233			0.236	3	0.447	1
AX-579463598		0.213			0.026		2	0.034	1
AX-579463606			0.233				1	0.233	1
AX-579463642		0.213					1	0.213	1
AX-579463851		0.213					1	0.213	1
AX-579463879		4.47e-10				0.236	2	2.53e-09	2.52e-04
AX-579463888		0.213					1	0.213	1
AX-579463903		0.031					1	0.031	1
AX-579463917		0.217					1	0.217	1
AX-579463923					0.248		1	0.248	1
AX-579463952	0.623			0.084	0.248		3	0.192	1
AX-579464013		0.213					1	0.213	1
AX-579464054	0.486			2.21e-05			2	1.34e-04	1
AX-579464091		0.213				1	2	0.542	1
AX-579464120		4.47e-10					1	4.47e-10	4.47e-05
AX-579464132		0.349					1	0.349	1
AX-579464192	0.324			0.084	0.248		3	0.125	1
AX-579464227	0.324	3.29e-08		0.875	1	1	5	5.71e-05	1
AX-579464315		0.213		0.096			2	0.1	1
AX-579464438	0.324			0.109	0.248		3	0.149	1
AX-579464440		0.213	0.004				2	0.006	1
AX-579464457					0.248		1	0.248	1
AX-579464503	0.324			0.084	0.248		3	0.125	1
AX-579464561		0.213	0.395			1	3	0.55	1
AX-579464583		0.213					1	0.213	1
AX-579464584		1	0.07			1	3	0.505	1
AX-579464650	0.324			0.084	0.248		3	0.125	1
AX-579464675				0.018	6.34e-05		2	1.71e-05	1
AX-579464695		0.031		0.2	0.002		3	0.001	1
AX-579464724	0.001	1	0.077	0.018	6.34e-05	1	6	8.04e-06	0.761
AX-579464748			0.14				1	0.14	1
AX-579464787		0.213				1	2	0.542	1
AX-579464795		0.213				1	2	0.542	1
AX-579464825		0.213					1	0.213	1
AX-579464835	0.281			0.875	1		3	0.833	1
AX-579464870		0.213					1	0.213	1
AX-579464911				0.018			1	0.018	1
AX-579464929		0.213				0.44	2	0.315	1
AX-579464964		0.213					1	0.213	1
AX-579465022		0.213		0.03			2	0.038	1
AX-579465027		1	0.233			1	3	0.82	1
AX-579465077	0.517	0.031			0.7		3	0.174	1
AX-579465170					0.166		1	0.166	1
AX-579465216			0.395			1	2	0.762	1
AX-579465225	0.287	0.031		0.084	0.248		4	0.028	1
AX-579465235			0.395			1	2	0.762	1
AX-579465243		0.206					1	0.206	1
AX-579465249	1.53e-09	0.011					2	4.51e-10	4.51e-05
AX-579465333		0.213		0.174			2	0.159	1
AX-579465413		0.213					1	0.213	1
AX-579465441						1	1	1	1
AX-579465498		0.213					1	0.213	1
AX-579465649		0.213					1	0.213	1
AX-579465698		0.213			0.248		2	0.208	1
AX-579465702	0.324			0.084	0.248		3	0.125	1
AX-579465760	0.393			2.21e-05	7.74e-09		3	3.30e-11	3.32e-06
AX-579465776		0.213	1				2	0.542	1
AX-579465834	0.324	0.213		0.084	0.248		4	0.109	1
AX-579465949		0.213					1	0.213	1
AX-579466018		0.213	0.395			1	3	0.55	1
AX-579466030		0.031		0.174			2	0.033	1
AX-579466055		0.213		2.21e-05			2	6.23e-05	1
AX-579466082		0.213					1	0.213	1
AX-579466136	0.564			0.084	0.248		3	0.18	1
AX-579466156		0.213					1	0.213	1
AX-579466215		0.213					1	0.213	1
AX-579466220		0.213					1	0.213	1
AX-579466256						1	1	1	1
AX-579466356	0.414				0.04		2	0.084	1
AX-579466403		1	0.077			1	3	0.527	1
AX-579466465						1	1	1	1
AX-579466469	0.088			0.003	0.045		3	8.56e-04	1
AX-579466480	0.324			0.084	0.248		3	0.125	1
AX-579466483	2.97e-06	0.031					2	1.57e-06	0.151
AX-579466511				0.084			1	0.084	1
AX-579466528		0.213					1	0.213	1
AX-579466629		0.213					1	0.213	1
AX-579466658	0.324	1	0.233	0.875	0.322		5	0.659	1
AX-579466681		0.213					1	0.213	1
AX-579466944			0.395			0.593	2	0.574	1
AX-579466969	1.52e-13			0.003	0.045		3	1.49e-14	1.50e-09
AX-579467006		0.213					1	0.213	1
AX-579467222	8.20e-05			0.875	0.732		3	0.003	1
AX-579467554	0.001						1	0.001	1
AX-579467556	0.805						1	0.805	1
AX-579467601		1				0.564	2	0.887	1
AX-579467680		0.213	0.077			1	3	0.222	1
AX-579467882	0.393				4.38e-07	0.593	3	1.50e-05	1
AX-579467921	3.96e-05			0.084	0.248		3	9.32e-05	1
AX-579467950	1.14e-04			0.875	1	1	4	0.018	1
AX-579467960		1	0.077			1	3	0.527	1
AX-579468397		0.213	0.233			0.593	3	0.316	1
AX-579468426		1.83e-04	0.768				2	0.001	1
AX-579468488		1	0.077				2	0.274	1
AX-579468496		0.213	0.077				2	0.084	1
AX-579468537	8.20e-05		0.61	0.084	1		4	0.002	1
AX-579468560				0.082	6.04e-04		2	5.40e-04	1
AX-579468566			0.395				1	0.395	1
AX-579468590	0.287			0.005	1		3	0.04	1
AX-579468615		1	0.077				2	0.274	1
AX-579468745		0.746				1	2	0.965	1
AX-579468753	0.393		0.61	9.71e-06	7.74e-09		4	1.05e-10	1.05e-05
AX-579468773	0.324	0.213	0.395	0.875	0.248		5	0.418	1
AX-579468789	0.287	0.213		0.084	0.248		4	0.101	1
AX-579468805				2.21e-05			1	2.21e-05	1
AX-579468840		1	0.077				2	0.274	1
AX-579468870	8.20e-05	0.213		0.084	0.045		4	6.01e-05	1
AX-579469036		0.213	0.395	0.025			3	0.055	1
AX-579469274		0.213	0.296				2	0.237	1
AX-579469442	0.324			0.084	0.248	1	4	0.265	1
AX-579469456				0.165		1	2	0.463	1
AX-579469474			0.395				1	0.395	1
AX-579469566		1	0.077			1	3	0.527	1
AX-579469660					0.124	1	2	0.382	1
AX-579469668		0.031	0.486			1	3	0.21	1
AX-579469716		0.031	0.039	0.018	0.045	0.704	5	0.002	1
AX-579469802		0.001					1	0.001	1
AX-579469817		0.006					1	0.006	1
AX-579469861			0.395	7.36e-06	1		3	2.76e-04	1
AX-579469906		1	0.077			0.593	3	0.404	1
AX-579469941			0.395			1	2	0.762	1
AX-579469984		1	1			1	3	1	1
AX-579470010			0.395				1	0.395	1
AX-579470035				0.749	0.684	0.593	3	0.881	1
AX-579470050	0.805						1	0.805	1
AX-579470064		0.213	0.233			0.593	3	0.316	1
AX-579470158		1	0.077				2	0.274	1
AX-579470160	0.324	0.213	0.077	0.084	0.248		5	0.051	1
AX-579470199	8.20e-05			0.083	0.248		3	1.74e-04	1
AX-579470200	8.20e-05			0.084	0.248	0.593	4	5.55e-04	1
AX-579470215		0.213		0.174		1	3	0.359	1
AX-579470234	0.001	0.213			6.34e-05	1	4	2.07e-05	1
AX-579470312		0.213					1	0.213	1
AX-579470349		1	0.077				2	0.274	1
AX-579470419		0.213	0.395			0.593	3	0.423	1
AX-579470441		0.213	0.395		0.248	0.593	4	0.361	1
AX-579470466	0.003			0.095	0.48		3	0.006	1
AX-579470481	0.324			0.084	0.045		3	0.037	1
AX-579470501	0.324	0.213		0.084	1	1	5	0.414	1
AX-579470596		0.213	0.395	0.09	0.248	1	5	0.249	1
AX-579470671		1	0.077				2	0.274	1
AX-579470680	8.20e-05	0.092	0.126	0.055	0.322		5	9.03e-05	1
AX-579470692		1	0.233			0.593	3	0.683	1
AX-579470715				0.174	0.248		2	0.179	1
AX-579470840	0.287	0.213	0.395	0.875	0.248		5	0.397	1
AX-579470870			0.395				1	0.395	1
AX-579470871	0.324	0.732	2.55e-08	0.084	0.248	0.593	6	5.39e-06	0.512
AX-579470903		1	0.395			1	3	0.932	1
AX-579470904		0.322	0.144			1	3	0.408	1
AX-579470910		0.213	0.077		0.186	0.326	4	0.086	1
AX-579470947			0.14				1	0.14	1
AX-579470958			0.395	0.02	0.248		3	0.052	1
AX-579471008			0.395			1	2	0.762	1
AX-579471050		1.56e-05	0.077			1	3	1.29e-04	1
AX-579471074		0.213	0.395	0.018		0.593	4	0.082	1
AX-579471121		1	0.395		0.248		3	0.59	1
AX-579471139			0.395			0.593	2	0.574	1
AX-579471165	0.324		0.233	0.083	0.248	1	5	0.228	1
AX-579471207	0.67	0.105			0.045		3	0.074	1
AX-579471253	0.623						1	0.623	1
AX-579471351			0.395			0.593	2	0.574	1
AX-579471405	0.805						1	0.805	1
AX-579471414	0.131			2.21e-05	7.74e-09		3	1.18e-11	1.19e-06
AX-579471472		0.144	0.233				2	0.148	1
AX-579471579		0.031					1	0.031	1
AX-579471605						0.695	1	0.695	1
AX-579471617		1	0.233				2	0.573	1
AX-579471641	0.324		0.395	0.875	1	1	5	0.929	1
AX-579471676		0.213	0.077			1	3	0.222	1
AX-579471677			0.395			1	2	0.762	1
AX-579471745	0.325	0.059		0.144	0.05	1	5	0.059	1
AX-579471746		0.213	0.077			1	3	0.222	1
AX-579471860	0.324	1	0.233	0.875	1	1	6	0.942	1
AX-579472170		0.213				0.593	2	0.387	1
AX-579472425	0.805		0.233			0.593	3	0.624	1
AX-579472446						0.593	1	0.593	1
AX-579472482	0.901	0.213	0.395			1	4	0.74	1
AX-579472514			0.14	0.233			2	0.145	1
AX-579472524	0.281			0.003	0.045		3	0.002	1
AX-579472533	0.324			0.084	0.248		3	0.125	1
AX-579472552	1.25e-04	0.213	0.233	2.21e-05	7.74e-09	0.593	6	7.65e-13	7.70e-08
AX-579472640	0.324	0.213		0.875	1		4	0.69	1
AX-579472691		0.213	0.395		0.248		3	0.258	1
AX-579472697	0.805	0.213		0.174		0.593	4	0.426	1
AX-579472704	0.324			0.875	1	0.704	4	0.92	1
AX-579472723						0.593	1	0.593	1
AX-579472727	0.522		0.233	0.875	1		4	0.812	1
AX-579472735				0.014			1	0.014	1
AX-579472787	0.522			0.875	0.248		3	0.629	1
AX-579472876	0.287	0.213	0.077	0.084	0.248	1	6	0.102	1
AX-579473088	0.805	0.213	0.077			0.593	4	0.286	1
AX-579473116	0.033						1	0.033	1
AX-579473162	0.805	0.213				0.593	3	0.599	1
AX-579473619						0.593	1	0.593	1
AX-579473663		0.273	0.213				2	0.223	1
AX-579473787		0.213	0.077				2	0.084	1
AX-579473823						0.564	1	0.564	1
AX-579473847		0.213				0.593	2	0.387	1
AX-579473897	1.45e-06		0.22				2	5.10e-06	0.485
AX-579473928	0.805	1	0.077			0.593	4	0.579	1
AX-579473953	2.96e-08	0.213		0.018			3	3.30e-08	0.003
AX-579474128	0.805			0.174	0.248		3	0.347	1
AX-579474136		0.213	0.077			0.593	3	0.159	1
AX-579474142	1	0.213	0.077		0.248		4	0.201	1
AX-579474143		0.213				0.593	2	0.387	1
AX-579474224	0.666			0.084	0.739	0.593	4	0.492	1
AX-579474324		3.29e-08					1	3.29e-08	0.003
AX-579474338		1	0.728			0.593	3	0.947	1
AX-579474349		0.213	0.077	0.077		0.593	4	0.072	1
AX-579474370		0.031				0.593	2	0.091	1
AX-579474404			0.077			0.564	2	0.179	1
AX-579474440			9.11e-04			0.44	2	0.004	1
AX-579474468		4.47e-10				1	2	1.01e-08	9.97e-04
AX-579474506		1			1	1	3	1	1
AX-579474512						1	1	1	1
AX-579474551		0.7	0.132				2	0.312	1
AX-579474605	0.324	0.213	0.395	0.084	1	1	6	0.432	1
AX-579474609					1.04e-06		1	1.04e-06	0.1
AX-579474622		1	0.395				2	0.762	1
AX-579474627		0.213				1	2	0.542	1
AX-579474664						1	1	1	1
AX-579474669	0.805	0.213	0.233		0.248		4	0.323	1
AX-579474680		0.213	0.077			1	3	0.222	1
AX-579474687	9.38e-07						1	9.38e-07	0.091
AX-579474705	0.287	1	0.395	0.084	1	0.593	6	0.584	1
AX-579474758	9.41e-06		0.395	0.084	0.045		4	1.65e-05	1
AX-579474789	0.324			0.875	1		3	0.866	1
AX-579474803		3.87e-06	0.851		0.026		3	1.27e-05	1
AX-579474964	0.805	0.213		0.174			3	0.318	1
AX-579474970	0.46		0.296	0.414	0.248	1	5	0.577	1
AX-579475085	0.831				0.002		2	0.013	1
AX-579475121	0.522			0.084	1		3	0.395	1
AX-579475199		0.213				0.593	2	0.387	1
AX-579475200						1	1	1	1
AX-579475215	8.47e-07	1	0.395			0.593	4	1.48e-04	1
AX-579475270			0.233			0.593	2	0.412	1
AX-579475362			0.728			0.608	2	0.804	1
AX-579475485	0.596	0.213					2	0.389	1
AX-579475550	0.324	0.058	0.395	0.875	0.248		5	0.231	1
AX-579475557	1	1	0.441		0.248		4	0.817	1
AX-579475610		1.85e-07				1	2	3.05e-06	0.292
AX-579475614			0.395			1	2	0.762	1
AX-579475628		0.213	0.077				2	0.084	1
AX-579475675		0.213	0.395				2	0.292	1
AX-579475682	0.45	0.213		0.109		0.593	4	0.253	1
AX-579475701	0.003			2.21e-05			2	1.21e-06	0.116
AX-579475729						0.593	1	0.593	1
AX-579475773		0.213				1	2	0.542	1
AX-579475776		1.56e-05					1	1.56e-05	1
AX-579475798	9.41e-06			0.083	0.248		3	2.64e-05	1
AX-579475799	0.002			0.083	0.248		3	0.003	1
AX-579475822	0.46			0.875	1	1	4	0.986	1
AX-579475863		1	0.077			1	3	0.527	1
AX-579475905		1	0.233			1	3	0.82	1
AX-579475934		0.105	0.039			0.593	3	0.061	1
AX-579475953						1	1	1	1
AX-579476020		1	0.077				2	0.274	1
AX-579476144				0.749			1	0.749	1
AX-579476174	1.25e-04				4.38e-07		2	1.35e-09	1.34e-04
AX-579476214	0.805						1	0.805	1
AX-579476252	0.805						1	0.805	1
AX-579476342		1	0.233			1	3	0.82	1
AX-579476372	0.287			0.875	1		3	0.837	1
AX-579476398		0.031				1	2	0.138	1
AX-579476474				0.084	0.248		2	0.101	1
AX-579476482			0.233	0.174		0.593	3	0.281	1
AX-579476534	0.805			0.174			2	0.415	1
AX-579476631			0.395				1	0.395	1
AX-579476709	0.805			0.174		1	3	0.685	1
AX-579476835		1	0.077			1	3	0.527	1
AX-579477107		1					1	1	1
AX-579477286			0.233		0.248	1	3	0.458	1
AX-579477291						1	1	1	1
AX-579477305			0.233				1	0.233	1
AX-579477559		0.273	0.373			1	3	0.601	1
AX-579477767		0.213					1	0.213	1
AX-579477814		0.213	0.077			1	3	0.222	1
AX-579477835		0.213				1	2	0.542	1
AX-579477914				0.003	6.34e-05		2	2.90e-06	0.277
AX-579477957	4.16e-11			0.024	1.82e-04		3	1.25e-13	1.26e-08
AX-579477979				0.174			1	0.174	1
AX-579478061	0.324	0.213	0.233	0.084	0.248	1	6	0.191	1
AX-579478120	0.127	0.213	0.395	0.109	0.527	1	6	0.253	1
AX-579478302	0.324	0.213	0.077	0.041	0.248	1	6	0.074	1
AX-579478341	1						1	1	1
AX-579478398	0.522	1	0.395	0.875	1	1	6	0.992	1
AX-579478665				0.786	4.38e-07		2	5.47e-06	0.52
AX-579478731		0.031				1	2	0.138	1
AX-579478747			0.395		7.09e-08		2	5.15e-07	0.05
AX-579478759		0.273	0.395			0.65	3	0.504	1
AX-579478767		1.56e-05	0.077			1	3	1.29e-04	1
AX-579479017		0.031					1	0.031	1
AX-579479080	0.517		0.039				2	0.099	1
AX-579479103		1	0.233				2	0.573	1
AX-579479149	0.805						1	0.805	1
AX-579479375		1	0.077				2	0.274	1
AX-579479516	0.522		0.233	0.041	0.248	1	5	0.203	1
AX-579479646	7.59e-06					1	2	9.70e-05	1
AX-579479676	0.05				0.059		2	0.02	1
AX-579479728		0.213	0.395				2	0.292	1
AX-579479751	0.522	1	0.233	0.875	1		5	0.923	1
AX-579479754		1.56e-05	0.395			1	3	5.24e-04	1
AX-579479800		1	0.039			1	3	0.371	1
AX-579479829	0.001	0.031		0.018		0.593	4	2.95e-04	1
AX-579479842		0.213				1	2	0.542	1
AX-579479892	0.67	0.031			0.04		3	0.027	1
AX-579479939				0.041	4.38e-07	0.593	3	2.00e-06	0.192
AX-579480017	0.281	1	0.031	0.048	1		5	0.112	1
AX-579480104	1.15e-12	0.001					2	4.31e-14	4.35e-09
AX-579480266						1	1	1	1
AX-579480345					0.441	0.704	2	0.673	1
AX-579480376	0.287			0.875	1		3	0.837	1
AX-579480488	0.324			0.875	0.248		3	0.505	1
AX-579480490	0.805						1	0.805	1
AX-579480515				0.03			1	0.03	1
AX-579480528	1.06e-07		0.395	0.144	1		4	8.05e-06	0.762
AX-579480540			0.395				1	0.395	1
AX-579480588	9.41e-06			1	0.739		3	5.80e-04	1
AX-579480603					0.002		1	0.002	1
AX-579480648	0.46	1.56e-05	0.395	0.875	1		5	0.004	1
AX-579480663		1	0.077				2	0.274	1
AX-579480722			0.233			1	2	0.573	1
AX-579480726	0.18			0.875	0.248		3	0.371	1
AX-579480810	0.324			0.875	1		3	0.866	1
AX-579480857			0.395				1	0.395	1
AX-579480875		0.213	0.233				2	0.198	1
AX-579480961	0.623	3.29e-08		1	0.322	0.695	5	3.23e-05	1
AX-579481112	0.486	0.213	0.039				3	0.087	1
AX-579481138		7.61e-04				0.68	2	0.004	1
AX-579481155		1	1			1	3	1	1
AX-579481167	0.83				0.045		2	0.161	1
AX-579481290	0.522		0.07	0.875	1		4	0.55	1
AX-579481326		0.213			0.002		2	0.004	1
AX-579481462	0.324	1		0.084	0.695		4	0.439	1
AX-579481591	0.001			0.018			2	2.93e-04	1
AX-579481649			0.039				1	0.039	1
AX-579481755		4.47e-10					1	4.47e-10	4.47e-05
AX-579481777		0.213					1	0.213	1
AX-579481793			0.233				1	0.233	1
AX-579481800			0.077				1	0.077	1
AX-579481853	0.003		0.395				2	0.01	1
AX-579481917	0.161	0.213	0.395	1	1		5	0.569	1
AX-579481930	0.805					1	2	0.98	1
AX-579481940	0.073		0.14				2	0.057	1
AX-579481954	0.805	0.213	0.077			1	4	0.372	1
AX-579482186						1	1	1	1
AX-579482236		1	1			1	3	1	1
AX-579482303		0.213	0.395				2	0.292	1
AX-579482368						1	1	1	1
AX-579482528				0.084	0.248		2	0.101	1
AX-579482772	0.324	1	0.395	0.174	0.248	1	6	0.581	1
AX-579482792	0.805						1	0.805	1
AX-579482817		0.098					1	0.098	1
AX-579482855	0.033				7.74e-09		2	5.91e-09	5.86e-04
AX-579482858			1			1	2	1	1
AX-579483006		0.001					1	0.001	1
AX-579483028			0.395				1	0.395	1
AX-579483058						1	1	1	1
AX-579483087	0.088		0.039		0.045	0.593	4	0.017	1
AX-579483215	0.524	1.83e-04					2	9.81e-04	1
AX-579483217				0.084			1	0.084	1
AX-579483253			0.039			0.593	2	0.11	1
AX-579483399			0.233			1	2	0.573	1
AX-579483482		0.213		0.084	0.248		3	0.093	1
AX-579483593	8.60e-08	1	0.077	0.018	6.34e-05		5	4.07e-10	4.07e-05
AX-579483637	0.45		0.373	0.875	0.739		4	0.815	1
AX-579483674		0.213					1	0.213	1
AX-579483877		1	0.395			1	3	0.932	1
AX-579483896		3.29e-08	0.039				2	2.75e-08	0.003
AX-579483963		0.031			0.002	0.695	3	0.002	1
AX-579484121					0.337		1	0.337	1
AX-579484124		1	1			1	3	1	1
AX-579484261	1.25e-04				0.045		2	7.41e-05	1
AX-579484265	0.324			0.875	1		3	0.866	1
AX-579484289		1	0.395				2	0.762	1
AX-579484323	1.44e-04	0.441	0.077				3	4.30e-04	1
AX-579484336	0.522	0.213	0.395	0.875	0.739	1	6	0.849	1
AX-579484382		1	0.077			1	3	0.527	1
AX-579484389		1	0.395			1	3	0.932	1
AX-579484427		1	0.395				2	0.762	1
AX-579484485	0.522			0.875	1		3	0.955	1
AX-579484490	0.805			0.084	0.248		3	0.225	1
AX-579484536	0.522				0.248		2	0.395	1
AX-579484713			0.003	1	1		3	0.074	1
AX-579484773		0.213	0.077			1	3	0.222	1
AX-579484871	0.019				0.166		2	0.021	1
AX-579484930	0.287		0.077	0.875	1		4	0.444	1
AX-579484945	0.805		0.395				2	0.682	1
AX-579485006			0.082			1	2	0.287	1
AX-579485015	0.805						1	0.805	1
AX-579485173	0.805		0.724				2	0.897	1
AX-579485203		1	1				2	1	1
AX-579485260		0.031					1	0.031	1
AX-579485294	0.805			0.875	0.248		3	0.746	1
AX-579485323		0.213	0.233	0.174		1	4	0.301	1
AX-579485422						1	1	1	1
AX-579485523				0.084	0.248		2	0.101	1
AX-579485736	0.324	1				1	3	0.895	1
AX-579485773		0.373	0.077			1	3	0.312	1
AX-579485790						1	1	1	1
AX-579485885		0.213	0.395			1	3	0.55	1
AX-579485890						1	1	1	1
AX-579485936	0.805	0.213	0.395				3	0.495	1
AX-579486074		0.213	0.395				2	0.292	1
AX-579486142		1	1			1	3	1	1
AX-579486266			0.077			1	2	0.274	1
AX-579486312			0.395	0.003	7.74e-09		3	2.96e-09	2.95e-04
AX-579486420		0.213	0.233	0.174		1	4	0.301	1
AX-579486423		3.29e-08	0.039				2	2.75e-08	0.003
AX-579486517	0.805						1	0.805	1
AX-579486555			0.233			1	2	0.573	1
AX-579486568		0.213					1	0.213	1
AX-579486928						1	1	1	1
AX-579487007	0.324			0.174	0.248		3	0.201	1
AX-579487015			0.233			1	2	0.573	1
AX-579487521				0.174			1	0.174	1
AX-579487551			0.077				1	0.077	1
AX-579487601		0.213	0.077			1	3	0.222	1
AX-579487637			0.233			1	2	0.573	1
AX-579487669			0.233			1	2	0.573	1
AX-579487798	0.324			0.875	1		3	0.866	1
AX-579487883	0.201				0.086		2	0.088	1
AX-579487963						1	1	1	1
AX-579488028		0.213	0.077				2	0.084	1
AX-579488108	0.201				0.02		2	0.026	1
AX-579488158		0.213					1	0.213	1
AX-579488194						1	1	1	1
AX-579488215			0.077				1	0.077	1
AX-579488273	0.014						1	0.014	1
AX-579488428			0.077				1	0.077	1
AX-579488455	0.805						1	0.805	1
AX-579488460		0.213	0.077			1	3	0.222	1
AX-579488731	0.522	1	0.077		0.248		4	0.325	1
AX-579488846	0.67						1	0.67	1
AX-579488860		0.213	0.077			1	3	0.222	1
AX-579489009		0.213	0.077				2	0.084	1
AX-579489021		0.213	0.077				2	0.084	1
AX-579489128	0.383				0.248		2	0.319	1
AX-579489173	0.522	1			0.248		3	0.665	1
AX-579489177			0.077				1	0.077	1
AX-579489211						1	1	1	1
AX-579489234		0.213	0.077			1	3	0.222	1
AX-579489255	0.805	1	0.077			0.704	4	0.617	1
AX-579489284	0.324	0.213			0.248	1	4	0.42	1
AX-579489286		1.56e-05	0.077				2	1.76e-05	1
AX-579489313		1	0.077			1	3	0.527	1
AX-579489368	0.085	1			0.248		3	0.26	1
AX-579489498		0.213	0.077			1	3	0.222	1
AX-579489531		0.213	0.07			1	3	0.21	1
AX-579489713		0.213	0.039			1	3	0.143	1
AX-579489735	0.522	0.213	0.077		0.248	1	5	0.265	1
AX-579489741	0.709						1	0.709	1
AX-579489836						1	1	1	1
AX-579489883	9.38e-07						1	9.38e-07	0.091
AX-579489927		0.213	0.039			1	3	0.143	1
AX-579489953		1	1			1	3	1	1
AX-579489997	0.324	1	0.077		0.248		4	0.253	1
AX-579490041	1	0.213	0.077				3	0.222	1
AX-579490050						1	1	1	1
AX-579490071			0.724			1	2	0.958	1
AX-579490106		0.213	0.395	0.084	0.248	0.593	5	0.185	1
AX-579490223						1	1	1	1
AX-579490280		1	0.077				2	0.274	1
AX-579490320	0.522	0.213			0.248	1	4	0.517	1
AX-579490341		0.109	0.064				2	0.042	1
AX-579490342	0.324	0.144	0.164		0.124	1	5	0.176	1
AX-579490366	0.003						1	0.003	1
AX-579490387		3.29e-08	0.61			0.593	3	2.21e-06	0.212
AX-579490418	0.522	0.213			0.248	1	4	0.517	1
AX-579490518	7.59e-06	0.213				1	3	1.67e-04	1
AX-579490586			0.233			1	2	0.573	1
AX-579490604			0.126			1	2	0.386	1
AX-579490618	0.805	1	0.395	0.084	0.248		5	0.437	1
AX-579490732			0.077			1	2	0.274	1
AX-579490792				0.149			1	0.149	1
AX-579490839	0.324				0.248		2	0.283	1
AX-579490923		1	0.039			0.593	3	0.274	1
AX-579490983	0.052				0.157		2	0.048	1
AX-579491067				0.414	0.001		2	0.004	1
AX-579491174	0.522			0.084	1		3	0.395	1
AX-579491252	2.96e-08	0.213		0.637	0.045	0.695	5	1.71e-06	0.164
AX-579491264	0.085	0.213	0.233	0.875	1	1	6	0.511	1
AX-579491292	0.314			0.875	0.739		3	0.784	1
AX-579491302		0.213	0.039			1	3	0.143	1
AX-579491341		0.213				1	2	0.542	1
AX-579491488	0.67	0.213	0.61	0.084	1	1	6	0.629	1
AX-579491518		1	0.233				2	0.573	1
AX-579491555						1	1	1	1
AX-579491568	1		0.233	0.174			3	0.378	1
AX-579491575		0.031	0.395				2	0.066	1
AX-579491599	0.46	3.94e-05		0.014	0.273	1	5	2.80e-04	1
AX-579491628	0.218			0.003			2	0.005	1
AX-579491690		0.213	0.233			1	3	0.422	1
AX-579491710	0.805	0.213	0.233	0.018		1	5	0.154	1
AX-579491711		0.04	0.164				2	0.039	1
AX-579491725		0.213	0.486	0.006	0.248		4	0.023	1
AX-579491752	0.805		0.395	0.875	0.248		4	0.72	1
AX-579491763			0.137	0.14			2	0.095	1
AX-579491769	0.46			0.072	0.006		3	0.009	1
AX-579491898						0.704	1	0.704	1
AX-579491933						1	1	1	1
AX-579491939	0.287		0.233		0.248		3	0.224	1
AX-579491955	0.805		0.233	0.084	0.248		4	0.197	1
AX-579492020	0.522				0.248		2	0.395	1
AX-579492029				0.103	1		2	0.336	1
AX-579492105		1					1	1	1
AX-579492168						1	1	1	1
AX-579492240		0.213				1	2	0.542	1
AX-579492251		0.213	0.164			1	3	0.348	1
AX-579492268		0.213	0.039			1	3	0.143	1
AX-579492286				0.111			1	0.111	1
AX-579492297	0.805	0.213	0.039	0.084	0.248		5	0.059	1
AX-579492306	0.324		0.233	0.875	1	1	5	0.861	1
AX-579492368			0.233				1	0.233	1
AX-579492369	0.453		0.166	0.875	0.045		4	0.169	1
AX-579492405		1				1	2	1	1
AX-579492466	0.055	1	0.233	0.084	0.045	1	6	0.07	1
AX-579492630		1.56e-05	0.039	0.149		1	4	7.78e-05	1
AX-579492687	0.709	1	0.768			0.44	4	0.943	1
AX-579492860	0.088	0.031	0.233		0.016	0.593	5	0.008	1
AX-579492862	0.055		0.07				2	0.025	1
AX-579492973	0.709			0.174		1	3	0.651	1
AX-579493080	9.41e-06		0.233		6.34e-05		3	3.92e-08	0.004
AX-579493143					1.04e-06		1	1.04e-06	0.1
AX-579493144	0.121				6.34e-05		2	9.83e-05	1
AX-579493169		1					1	1	1
AX-579493195	8.20e-05				0.248	1	3	0.001	1
AX-579493212	7.89e-17						1	7.89e-17	7.98e-12
AX-579493282						1	1	1	1
AX-579493293		0.254				1	2	0.602	1
AX-579493327		0.213				1	2	0.542	1
AX-579493520	0.287		0.039	0.875	1	1	5	0.508	1
AX-579493615				0.875	0.248		2	0.549	1
AX-579493621	0.695	1	0.233		0.322		4	0.658	1
AX-579493657	0.287		0.233		0.045		3	0.072	1
AX-579494412	0.324		0.233		0.248	1	4	0.438	1
AX-579494546		1	0.039				2	0.165	1
AX-579494568	9.38e-07			0.875	0.248	1	4	1.52e-04	1
AX-579494614		1					1	1	1
AX-579494631	0.805						1	0.805	1
AX-579496780					0.7	0.704	2	0.841	1
AX-579497811		0.213	0.039				2	0.048	1
AX-579497824	0.003					1	2	0.021	1
AX-579498149	0.83	0.213	0.164			1	4	0.527	1
AX-579498263			0.067			0.704	2	0.192	1
AX-579498357	0.088		0.395				2	0.152	1
AX-579498384	0.001			0.786			2	0.008	1
AX-579498478	8.20e-05			0.174	0.248		3	3.26e-04	1
AX-579498595			0.092			1	2	0.311	1
AX-579498672	1	0.213	0.233	0.875	0.248		5	0.526	1
AX-579498738	0.263						1	0.263	1
AX-579498915	7.59e-06						1	7.59e-06	0.719
AX-579498989		0.213	0.233				2	0.198	1
AX-579499014	0.003			0.174			2	0.005	1
AX-579499239						0.593	1	0.593	1
AX-579499261			0.395			1	2	0.762	1
AX-579499286	0.67			0.03	0.166		3	0.076	1
AX-579499357	0.324			0.084	1		3	0.302	1
AX-579499384	1.25e-04					1	2	0.001	1
AX-579499391	0.805			0.296	1		3	0.825	1
AX-579499407						1	1	1	1
AX-579499472	0.324		0.233		0.248	1	4	0.438	1
AX-579499528				0.749			1	0.749	1
AX-579499544						0.033	1	0.033	1
AX-579499599	0.324	0.213	0.039		0.248	1	5	0.146	1
AX-579499724			0.233				1	0.233	1
AX-579499823	0.522		0.003	0.018	3.86e-05	1	5	9.04e-06	0.855
AX-579499831						0.695	1	0.695	1
AX-579499844		0.213	0.233		0.295		3	0.207	1
AX-579499851	0.805						1	0.805	1
AX-579499864	0.324				0.124	1	3	0.377	1
AX-579499886						1	1	1	1
AX-579499981		0.213	0.233			1	3	0.422	1
AX-579500001		0.213	0.233				2	0.198	1
AX-579500176	0.324			0.084	1	1	4	0.514	1
AX-579500234			0.233				1	0.233	1
AX-579500274	0.121			1	0.706		3	0.555	1
AX-579500290			0.008			1	2	0.046	1
AX-579500308	1		0.233				2	0.573	1
AX-579500389	1	0.349	0.035	0.053	0.086	1	6	0.075	1
AX-579500393		0.213	0.593				2	0.387	1
AX-579500402			0.233			1	2	0.573	1
AX-579500427	0.383		0.233		0.248		3	0.268	1
AX-579500478			0.123				1	0.123	1
AX-579500524		0.213	0.233				2	0.198	1
AX-579500527	0.45	0.014		0.157			3	0.031	1
AX-579500533		0.213					1	0.213	1
AX-579500711	0.702				0.337		2	0.578	1
AX-579500738	0.522			0.084	1	1	4	0.618	1
AX-579500777						1	1	1	1
AX-579500781						1	1	1	1
AX-579500815	0.522	0.213	0.486	0.174	0.248	1	6	0.435	1
AX-579500858		0.213	0.039	0.084	0.248		4	0.027	1
AX-579500877	0.805						1	0.805	1
AX-579500911	7.59e-06						1	7.59e-06	0.719
AX-579501035	9.38e-07		1	0.083	0.248		4	2.15e-05	1
AX-579501060	0.324		5.04e-04	0.654			3	0.006	1
AX-579501085	0.201				0.045		2	0.052	1
AX-579501105	0.805	0.213	0.233		0.248		4	0.323	1
AX-579501139	0.805	0.553	0.164			1	4	0.732	1
AX-579501241	0.324			0.875	1	1	4	0.961	1
AX-579501306			0.233			1	2	0.573	1
AX-579501361						1	1	1	1
AX-579501437	0.227	0.213	0.233		0.248	0.103	5	0.091	1
AX-579501453	0.805		0.233	0.084	0.248	0.68	5	0.294	1
AX-579501484						0.236	1	0.236	1
AX-579501509						1	1	1	1
AX-579501546						1	1	1	1
AX-579501594	0.174		0.732				2	0.389	1
AX-579501602	0.805					1	2	0.98	1
AX-579501665	0.324	0.213	0.233	0.875	1		5	0.577	1
AX-579501695						1	1	1	1
AX-579501702				0.084	0.248	1	3	0.257	1
AX-579501771			0.233			0.704	2	0.461	1
AX-579501816	0.383	0.096		0.228			3	0.144	1
AX-579501821	0.324	0.096	0.395	0.14			4	0.121	1
AX-579501826	0.324	0.096		1			3	0.326	1
AX-579501832	0.383	0.096	0.395	0.331			4	0.22	1
AX-579501845		0.213	0.233				2	0.198	1
AX-579501862			0.233			1	2	0.573	1
AX-579502020				0.174		1	2	0.477	1
AX-579502059						1	1	1	1
AX-579502111	0.052				0.045		2	0.017	1
AX-579502169	0.078			2.21e-05	7.74e-09		3	7.24e-12	7.28e-07
AX-579502170	0.805	0.213	0.233			1	4	0.598	1
AX-579502192		0.213	0.233	0.875	0.248		4	0.337	1
AX-579502193		0.213	0.039	0.174		1	4	0.109	1
AX-579502214	9.41e-06			0.084	1	1	4	4.54e-04	1
AX-579502270			0.233		4.38e-07		2	1.75e-06	0.168
AX-579502294	2.86e-05	0.213	0.039		0.045	1	5	6.40e-05	1
AX-579502317	0.383		0.016		0.441		3	0.066	1
AX-579502333	0.324						1	0.324	1
AX-579502354			0.395			0.44	2	0.478	1
AX-579502384	1.36e-06	0.213	0.593				3	2.37e-05	1
AX-579502388	0.324			0.875	1	1	4	0.961	1
AX-579502440	1.25e-04		0.395		0.045	1	4	0.001	1
AX-579502446		0.213	0.233			1	3	0.422	1
AX-579502495	0.324				6.34e-05		2	2.43e-04	1
AX-579502500	0.287				0.248		2	0.259	1
AX-579502519		0.031					1	0.031	1
AX-579502534	1	0.213	0.039			1	4	0.295	1
AX-579502634	1.21e-07				0.124	1	3	2.72e-06	0.26
AX-579502656			0.233				1	0.233	1
AX-579502674		0.213	0.039			1	3	0.143	1
AX-579502836	8.81e-05	0.031					2	3.74e-05	1
AX-579502969		0.213	0.233				2	0.198	1
AX-579503052				0.083	0.086	0.593	3	0.091	1
AX-579503103		1	0.768				2	0.971	1
AX-579503122	0.018			0.084	0.045	1	4	0.014	1
AX-579503160	0.67					1	2	0.938	1
AX-579503167	0.805	0.213	0.039	0.084	0.248		5	0.059	1
AX-579503240			0.035			1	2	0.152	1
AX-579503459						1	1	1	1
AX-579503594						0.695	1	0.695	1
AX-579503694	0.324				0.248		2	0.283	1
AX-579503730		0.213	0.233			1	3	0.422	1
AX-579503747	0.002	0.213	0.233			1	4	0.02	1
AX-579503754			0.111				1	0.111	1
AX-579503808	0.383				0.02	0.593	3	0.094	1
AX-579504107		0.213	0.233				2	0.198	1
AX-579504116			0.233				1	0.233	1
AX-579504185		0.213	0.233				2	0.198	1
AX-579504261	1					1	2	1	1
AX-579504293	0.805	0.273	0.126				3	0.305	1
AX-579504335		0.213	0.233			1	3	0.422	1
AX-579504347	1.14e-04	0.213	0.039	0.084	1	1	6	0.001	1
AX-579504369	0.805	0.213	0.039			1	4	0.264	1
AX-579504404	0.67						1	0.67	1
AX-579504525						1	1	1	1
AX-579504531	0.522	0.213	0.039		0.248	1	5	0.188	1
AX-579504544	0.805			0.084	0.248	1	4	0.416	1
AX-579504565				0.018	2.46e-06		2	8.11e-07	0.078
AX-579504578		0.213	0.395				2	0.292	1
AX-579504640	0.197					1	2	0.517	1
AX-579504986	0.324			0.174	0.248	1	4	0.383	1
AX-579505162	0.383				0.166		2	0.239	1
AX-579505175	0.805						1	0.805	1
AX-579505447	0.324			0.018	6.34e-05		3	4.74e-05	1
AX-579505498	0.805			0.174		1	3	0.685	1
AX-579505624				0.018		1	2	0.092	1
AX-579505728						0.695	1	0.695	1
AX-579505737						0.326	1	0.326	1
AX-579505794					1		1	1	1
AX-579505825			0.233			1	2	0.573	1
AX-579505829	0.611						1	0.611	1
AX-579505916				0.174			1	0.174	1
AX-579506066	0.001	0.213	0.039	0.174			4	9.45e-04	1
AX-579506173		0.213	0.039			1	3	0.143	1
AX-579506186		0.092				0.695	2	0.239	1
AX-579506261		0.213	0.395	0.174			3	0.206	1
AX-579506282	0.533				5.32e-04	1	3	0.012	1
AX-579506326		0.213	0.039	0.174		1	4	0.109	1
AX-579506446				2.21e-05		1	2	2.59e-04	1
AX-579506524	1.25e-04	0.213	0.039	2.21e-05		1	5	4.06e-07	0.039
AX-579506691	0.085		0.233	0.875	0.739		4	0.367	1
AX-579506838	0.324	0.213	0.039	0.875	1		5	0.278	1
AX-579506863	0.805	0.213	0.039	0.174		1	5	0.196	1
AX-579506878			0.233			1	2	0.573	1
AX-579507038	1	0.213	0.039			1	4	0.295	1
AX-579507242			0.233				1	0.233	1
AX-579507274				2.21e-05	0.045	0.593	3	7.03e-05	1
AX-579507456	7.59e-06			0.083	0.248	0.474	4	6.61e-05	1
AX-579507679	0.805						1	0.805	1
AX-579507713	0.324			0.875	1		3	0.866	1
AX-579507728	0.324				0.124	1	3	0.377	1
AX-579507756	0.805						1	0.805	1
AX-579507801				0.174		1	2	0.477	1
AX-579509226	1.25e-04	0.213	0.233	2.21e-05		1	5	1.82e-06	0.175
AX-579509258						0.44	1	0.44	1
AX-579509334					0.005		1	0.005	1
AX-579509807		0.213	0.233				2	0.198	1
AX-579509816	0.088	0.213	0.164		0.045	1	5	0.059	1
AX-579509845			0.164			1	2	0.46	1
AX-579509849		0.213	0.039	0.875	0.248		4	0.125	1
AX-579509947				0.174	0.248		2	0.179	1
AX-579509972				0.018	0.248		2	0.029	1
AX-579510159	0.136	0.213	0.039				3	0.035	1
AX-579510175			0.039		0.051		2	0.014	1
AX-579510185	3.05e-04	0.213	0.005	0.875	1	1	6	0.003	1
AX-579510229		0.213	0.233			1	3	0.422	1
AX-579510314						1	1	1	1
AX-579510409		0.213	0.233	0.174	0.248	1	5	0.266	1
AX-579510414		0.031	0.018				2	0.005	1
AX-579510419		0.213	0.233			1	3	0.422	1
AX-579510426			0.233			1	2	0.573	1
AX-579510479			0.109			1	2	0.35	1
AX-579510487		0.213	0.233	0.084		1	4	0.203	1
AX-579510542						1	1	1	1
AX-579510556			0.109				1	0.109	1
AX-579510568	0.324		0.233		0.248	1	4	0.438	1
AX-579510572		0.213	0.039				2	0.048	1
AX-579510616	1.25e-04			0.414	0.739		3	0.002	1
AX-579510660		0.213	0.395	0.018	0.724		4	0.093	1
AX-579510714	0.827					1	2	0.984	1
AX-579510741	0.324		0.233	0.084	0.248	1	5	0.229	1
AX-579510786	5.67e-04						1	5.67e-04	1
AX-579510966	0.324		0.233	0.174	1	1	5	0.564	1
AX-579511142	0.287			0.875	1	1	4	0.948	1
AX-579511190				0.005	0.295		2	0.01	1
AX-579511193	0.67		0.233	0.875	1	1	5	0.948	1
AX-579511207	0.522	0.213	0.039	0.875	1	1	6	0.516	1
AX-579511217			0.064			1	2	0.24	1
AX-579511272			0.233			0.4	2	0.315	1
AX-579511300	7.59e-06					0.695	2	6.93e-05	1
AX-579511309		0.213	0.039	0.174	0.248		4	0.044	1
AX-579511352		0.031		0.114	0.22		3	0.026	1
AX-579511380			0.039				1	0.039	1
AX-579511390			0.233			1	2	0.573	1
AX-579511407	0.805	0.213	0.039				3	0.124	1
AX-579511417	0.805			0.875	0.248	1	4	0.9	1
AX-579511586	0.324	0.213	0.233	0.084	0.248		5	0.099	1
AX-579511595	0.805		0.395	0.084		1	4	0.51	1
AX-579511612	0.324		0.233	0.084	0.248	1	5	0.229	1
AX-579511622						1	1	1	1
AX-579511689	0.324			0.174	1	1	4	0.675	1
AX-579511727	0.49		0.233				2	0.362	1
AX-579511810	0.324	0.213	0.039	0.875	1		5	0.278	1
AX-579511838		0.213	0.039			1	3	0.143	1
AX-579511895	0.324	0.213	0.296	0.875	1	1	6	0.781	1
AX-579511903			0.233				1	0.233	1
AX-579511905			0.233				1	0.233	1
AX-579511971				0.041			1	0.041	1
AX-579512014					0.22	1	2	0.554	1
AX-579512042	0.522	0.213	0.039	0.875	1		5	0.346	1
AX-579512121	0.522		0.395	0.875	0.739		4	0.854	1
AX-579512169	0.042		0.233	0.144	1		4	0.107	1
AX-579512209		0.213	0.233				2	0.198	1
AX-579512222				0.174	0.248	1	3	0.392	1
AX-579512229			0.018			1	2	0.092	1
AX-579512251	0.14			0.183	0.045		3	0.035	1
AX-579512260	0.324		0.233	0.875	1	1	5	0.861	1
AX-579512264	0.287	0.213	0.039	0.084	0.248	1	6	0.07	1
AX-579512403	0.324			0.014	0.239		3	0.034	1
AX-579512515		0.213	0.039				2	0.048	1
AX-579512588	0.805	1				1	3	0.999	1
AX-579512637	0.67	0.213	0.039			1	4	0.239	1
AX-579512684	0.805					1	2	0.98	1
AX-579512692						0.44	1	0.44	1
AX-579512772						1	1	1	1
AX-579512790						1	1	1	1
AX-579512845			0.011				1	0.011	1
AX-579512848	0.131	0.031	0.039	0.587	5.69e-06		5	5.54e-06	0.526
AX-579512855		0.213	0.233				2	0.198	1
AX-579512874		0.752	0.126				2	0.317	1
AX-579513005	1.06e-07					1	2	1.81e-06	0.174
AX-579513093		0.031			4.38e-07		2	2.57e-07	0.025
AX-579513145		0.075		2.21e-05	7.74e-09	1	4	7.66e-11	7.68e-06
AX-579513213		0.213	0.233			0.564	3	0.307	1
AX-579513294						1	1	1	1
AX-579513309					0.68		1	0.68	1
AX-579513333	0.324	0.213	0.233	0.174	1		5	0.301	1
AX-579513374		0.213	0.233				2	0.198	1
AX-579513389		1	1				2	1	1
AX-579513447	0.67			0.003	0.002	0.593	4	0.001	1
AX-579513518	0.324				0.248	1	3	0.539	1
AX-579513528	0.522				0.248	1	3	0.665	1
AX-579513643						1	1	1	1
AX-579513809		0.213	0.233	2.21e-05			3	1.19e-04	1
AX-579513836						1	1	1	1
AX-579513951						1	1	1	1
AX-579513992						0.44	1	0.44	1
AX-579514005	0.765					1	2	0.97	1
AX-579514046		0.213	0.039			1	3	0.143	1
AX-579514112						1	1	1	1
AX-579514149						1	1	1	1
AX-579514185		0.213	0.233			1	3	0.422	1
AX-579514244	0.805		0.233			1	3	0.764	1
AX-579514261	0.709	0.213	0.039	0.083		0.695	5	0.1	1
AX-579514305		1	0.233			1	3	0.82	1
AX-579514529	0.623	0.537	1.30e-07				3	7.04e-06	0.668
AX-579514673						1	1	1	1
AX-579514764						1	1	1	1
AX-579514780						1	1	1	1
AX-579514788						1	1	1	1
AX-579514832		0.213	0.233			1	3	0.422	1
AX-579514847		0.213	0.233			0.695	3	0.346	1
AX-579514866						0.695	1	0.695	1
AX-579514871						1	1	1	1
AX-579514892						1	1	1	1
AX-579514922						1	1	1	1
AX-579514940	0.805			0.084		1	3	0.494	1
AX-579514942		0.213	0.233				2	0.198	1
AX-579514947	0.805	0.213	0.233				3	0.375	1
AX-579514952					0.821	1	2	0.983	1
AX-579515031	9.38e-07						1	9.38e-07	0.091
AX-579515072						1	1	1	1
AX-579515080	0.805					1	2	0.98	1
AX-579515086	0.67	0.213	0.233	0.084	0.248		5	0.149	1
AX-579515091		0.213	0.233				2	0.198	1
AX-579515106	2.96e-08			0.018	0.045		3	8.01e-09	7.93e-04
AX-579515185						1	1	1	1
AX-579515189						1	1	1	1
AX-579515214		0.213	0.039			0.65	3	0.107	1
AX-579515223						1	1	1	1
AX-579515251	0.287				0.248	1	3	0.508	1
AX-579515275			0.233				1	0.233	1
AX-579515306		0.213	0.039			1	3	0.143	1
AX-579515312						1	1	1	1
AX-579515328	0.805			1			2	0.98	1
AX-579515339	0.324	0.213	0.233	0.174	1		5	0.301	1
AX-579515347						1	1	1	1
AX-579515371	0.805	0.213	0.039	0.174	0.248	1	6	0.177	1
AX-579515405			0.233			0.593	2	0.412	1
AX-579515432	0.324	0.213	0.039		0.248	1	5	0.146	1
AX-579515604	0.522		0.233	0.875	1	1	5	0.923	1
AX-579515630	0.287	0.213	0.039		0.248	1	5	0.137	1
AX-579515682			0.233			1	2	0.573	1
AX-579515823	0.088		0.233		0.045		3	0.03	1
AX-579515838		0.213	0.233			1	3	0.422	1
AX-579515855	0.324			0.084	0.248		3	0.125	1
AX-579515944				0.206		1	2	0.531	1
AX-579516017	0.324			0.563	6.34e-05	1	4	0.004	1
AX-579516094	0.14		0.018				2	0.018	1
AX-579516150	0.522	0.213	0.039	0.084	0.248	1	6	0.098	1
AX-579516235	1.31e-06			0.084		1	3	1.60e-05	1
AX-579516286				0.174	0.045	0.695	3	0.108	1
AX-579516344	0.439		0.109			0.593	3	0.309	1
AX-579516357					4.38e-07	0.593	2	4.20e-06	0.4
AX-579516364	1		0.233				2	0.573	1
AX-579516381			0.395				1	0.395	1
AX-579516410	0.324				6.34e-05		2	2.43e-04	1
AX-579516429	0.324	0.213	0.039	0.174	1		5	0.12	1
AX-579516482		0.213					1	0.213	1
AX-579516483	0.088						1	0.088	1
AX-579516484	0.805	1	0.039			1	4	0.545	1
AX-579516544		0.213	0.039				2	0.048	1
AX-579516598	0.324	0.213	0.233	0.055	1		5	0.17	1
AX-579516770	0.324		0.233	0.018	1	1	5	0.215	1
AX-579516814	1			0.875	0.248	1	4	0.931	1
AX-579516815						0.695	1	0.695	1
AX-579516821						1	1	1	1
AX-579516847		1	0.395	0.373		0.182	4	0.511	1
AX-579516999		0.213	0.039				2	0.048	1
AX-579517067		1	0.039	2.21e-05			3	9.68e-05	1
AX-579517368		1	0.768	0.228	4.38e-07	0.695	5	2.25e-04	1
AX-579517518						0.695	1	0.695	1
AX-579517648				0.875	0.715		2	0.919	1
AX-579517779	0.687	0.213			0.124	1	4	0.431	1
AX-579517785	0.324			0.174	1		3	0.451	1
AX-579517792		0.058		4.64e-05			2	3.71e-05	1
AX-579517807	1	1	0.039	0.174	0.248		5	0.236	1
AX-579517811		1	0.039			1	3	0.371	1
AX-579517829			1.47e-05		0.045		2	1.02e-05	0.96
AX-579517831	0.287	1	0.233	0.084	0.248		5	0.215	1
AX-579517842		1	0.039			1	3	0.371	1
AX-579517862	0.324	1	0.039	0.875	1		5	0.531	1
AX-579517984	6.09e-08	0.02	0.05				3	1.80e-08	0.002
AX-579518006	0.136						1	0.136	1
AX-579518040	0.805	0.213				1	3	0.74	1
AX-579518092	0.805	1					2	0.98	1
AX-579518155	0.324	0.213	0.233		6.34e-05		4	5.58e-04	1
AX-579518225		1	0.233				2	0.573	1
AX-579518273			0.039			1	2	0.165	1
AX-579518286			0.233			1	2	0.573	1
AX-579518308		0.213					1	0.213	1
AX-579518371		0.213	0.233	0.174	0.248		4	0.138	1
AX-579518440		0.355	0.768				2	0.627	1
AX-579518484		0.343	0.164	0.03	7.61e-04	0.704	5	0.002	1
AX-579518504			0.07	0.355	0.045		3	0.035	1
AX-579518551	0.287				0.248	1	3	0.508	1
AX-579518582	0.324		0.233		0.124	1	4	0.314	1
AX-579518882		1	0.039			1	3	0.371	1
AX-579518890	0.522	0.213			0.248	1	4	0.517	1
AX-579518929	0.372	0.213	0.039	0.174	1	0.704	6	0.202	1
AX-579518943	3.16e-05	1	0.039		4.38e-07	1	5	1.65e-08	0.002
AX-579519100		0.213	0.039				2	0.048	1
AX-579519169	0.522	0.213	0.233	0.018	1		5	0.122	1
AX-579519220	0.263		0.039	0.011	0.732	1	5	0.042	1
AX-579519257		1	0.039				2	0.165	1
AX-579519267		1	0.039				2	0.165	1
AX-579519341	8.20e-05	0.213	0.395		6.34e-05	0.593	5	3.10e-06	0.296
AX-579519375		0.021	0.395	0.084			3	0.024	1
AX-579519382	0.702	1	0.039			1	4	0.515	1
AX-579519474	0.324		0.233	0.174	1		4	0.371	1
AX-579519528	0.805					0.695	2	0.884	1
AX-579519564		0.213					1	0.213	1
AX-579519594			0.395				1	0.395	1
AX-579519643	0.805	0.021	0.395	0.083		0.695	5	0.107	1
AX-579519670	0.14		0.395				2	0.215	1
AX-579519682	0.805						1	0.805	1
AX-579519705						0.704	1	0.704	1
AX-579519710	0.324	0.213	0.039	0.174	1	1	6	0.223	1
AX-579519746	0.805	0.213		1			3	0.74	1
AX-579519754	0.324	0.213	0.039	0.875	1	0.593	6	0.358	1
AX-579519785	0.383	0.859	0.395	0.174	1		5	0.67	1
AX-579519808	0.324	0.213	0.233		6.34e-05		4	5.58e-04	1
AX-579519900					4.38e-07		1	4.38e-07	0.043
AX-579519976	1			0.027	0.005		3	0.006	1
AX-579519986		0.213				1	2	0.542	1
AX-579520091	4.72e-07			0.003	0.536	0.648	4	8.65e-07	0.084
AX-579520240	0.67	1	0.039	0.174	0.732	1	6	0.493	1
AX-579520389	0.085				0.248	1	3	0.26	1
AX-579520646	0.805	0.213	0.039	0.084			4	0.06	1
AX-579520695	0.29			0.01	0.248		3	0.026	1
AX-579520710	3.01e-04			0.174	1		3	0.003	1
AX-579520774	1			0.084			2	0.291	1
AX-579520852		0.213	0.233			1	3	0.422	1
AX-579521020		0.752	0.126			1	3	0.58	1
AX-579521120		1	0.395	0.875	0.248	1	5	0.897	1
AX-579521213		0.213	0.233	0.174	0.248		4	0.138	1
AX-579521244	0.324			0.174	1		3	0.451	1
AX-579521297	0.901			0.072			2	0.243	1
AX-579521399	0.67				0.248	1	3	0.733	1
AX-579521449	0.805	0.213				1	3	0.74	1
AX-579521488		1	0.233	0.174	0.248		4	0.326	1
AX-579521546		0.859	0.395			1	3	0.904	1
AX-579521551	0.67	0.031	0.395			1	4	0.292	1
AX-579521736	0.14		0.233	2.21e-05		1	4	4.22e-04	1
AX-579521770	0.033						1	0.033	1
AX-579521829		0.213	0.018			1	3	0.085	1
AX-579521880				0.003			1	0.003	1
AX-579521999				0.084			1	0.084	1
AX-579522146		0.021	0.395				2	0.047	1
AX-579522255			0.233				1	0.233	1
AX-579522287	0.287				0.248	1	3	0.508	1
AX-579522300		1	0.233			1	3	0.82	1
AX-579522322		1	0.233			1	3	0.82	1
AX-579522374				1.97e-09			1	1.97e-09	1.97e-04
AX-579522381				0.084			1	0.084	1
AX-579522390	1.90e-08			0.084	0.248	1	4	7.69e-07	0.074
AX-579522418			0.164				1	0.164	1
AX-579522469	0.453			0.01	0.045	1	4	0.031	1
AX-579522512		0.021	0.233			1	3	0.099	1
AX-579522542		1	0.233				2	0.573	1
AX-579522554		0.031					1	0.031	1
AX-579522561	0.805	1	0.233	0.046	0.248		5	0.265	1
AX-579522625		0.213					1	0.213	1
AX-579522675		1	0.233			1	3	0.82	1
AX-579522707			0.233	0.003			2	0.005	1
AX-579522738	1	1	0.039	0.174	0.248		5	0.236	1
AX-579522774		0.213				1	2	0.542	1
AX-579522956						1	1	1	1
AX-579523002				0.084			1	0.084	1
AX-579523238	1				0.441		2	0.802	1
AX-579523304	0.805	0.213	0.395	0.084		1	5	0.41	1
AX-579523462	0.805	0.213	0.109	0.084		0.44	5	0.149	1
AX-579523760	2.85e-05	0.213			6.34e-05		3	9.89e-08	0.01
AX-579523768		0.213					1	0.213	1
AX-579523787	0.324			0.875	5.32e-04		3	0.007	1
AX-579523802						1	1	1	1
AX-579523809	7.59e-06	1	0.039			1	4	2.06e-04	1
AX-579523947	0.805	0.859		0.084		1	4	0.681	1
AX-579524022	9.95e-05	0.349	0.164	0.126	0.637	1	6	0.004	1
AX-579524097					0.608		1	0.608	1
AX-579524152		0.758	0.206				2	0.446	1
AX-579524166	0.67			0.875	0.739		3	0.947	1
AX-579524232		0.064	0.039			0.695	3	0.048	1
AX-579524234			0.233	2.21e-05		1	3	4.50e-04	1
AX-579524252		0.213		0.174	0.248	1	4	0.311	1
AX-579524310		0.752				0.564	2	0.788	1
AX-579524330	0.324	0.213		0.084	0.248	1	5	0.218	1
AX-579524350	0.805					1	2	0.98	1
AX-579524363	0.287			0.014	3.86e-05		3	2.20e-05	1
AX-579524377	0.195				0.248		2	0.195	1
AX-579524401	1	1	0.233			1	4	0.94	1
AX-579524420	0.67	0.349		0.875	1		4	0.923	1
AX-579524696	0.208			0.084	0.248	1	4	0.208	1
AX-579524700		0.002	6.87e-04			0.704	3	1.08e-04	1
AX-579524805	0.324						1	0.324	1
AX-579525195	0.524	0.213		0.084	0.166		4	0.114	1
AX-579525293	0.522				0.248	1	3	0.665	1
AX-579525339	0.522	0.213		0.084	0.248	1	5	0.276	1
AX-579525347		1	0.039			1	3	0.371	1
AX-579525363	0.666			0.875	5.32e-04		3	0.013	1
AX-579525442			0.233	0.084		1	3	0.248	1
AX-579525477		1	0.233				2	0.573	1
AX-579525501		0.213				1	2	0.542	1
AX-579525600	0.324			0.174	1	1	4	0.675	1
AX-579525627	0.805	0.273	0.233	0.174	0.248	1	6	0.428	1
AX-579525688	0.695	0.213		0.174	0.248	1	5	0.431	1
AX-579525872						1	1	1	1
AX-579526897						1	1	1	1
AX-579527227			0.233			1	2	0.573	1
AX-579527264	0.324		1		6.34e-05	1	4	0.006	1
AX-579527459	0.007	0.273		2.21e-05		1	4	4.35e-05	1
AX-579527479		1	0.233			1	3	0.82	1
AX-579527525	0.805			0.875	0.248	1	4	0.9	1
AX-579527640		0.213	0.039			1	3	0.143	1
AX-579527684	0.805			0.875			2	0.951	1
AX-579527728	0.324	1	0.039		0.248	1	5	0.318	1
AX-579527737		0.213	0.039			1	3	0.143	1
AX-579527805	0.324			0.174	1		3	0.451	1
AX-579527891						1	1	1	1
AX-579527908		0.021	0.395				2	0.047	1
AX-579527916		0.273	0.233				2	0.239	1
AX-579527939			0.233	0.174	0.248	1	4	0.326	1
AX-579528015			0.007			1	2	0.043	1
AX-579528036		0.021	0.039	0.174	0.248		4	0.008	1
AX-579528069		0.19	0.233			1	3	0.397	1
AX-579528089				0.084		1	2	0.291	1
AX-579528160		0.213	0.233				2	0.198	1
AX-579528202		0.213					1	0.213	1
AX-579528206	1			0.014		1	3	0.204	1
AX-579528284		0.213				1	2	0.542	1
AX-579528308	0.522			0.875	1		3	0.955	1
AX-579528318	0.805	0.213	0.233			1	4	0.598	1
AX-579528323	0.324			0.084	0.248		3	0.125	1
AX-579528351		0.02					1	0.02	1
AX-579528365	0.001						1	0.001	1
AX-579528392	0.383						1	0.383	1
AX-579528590		0.213	0.233			0.695	3	0.346	1
AX-579528596	0.324			0.875	1	1	4	0.961	1
AX-579528672		0.058	0.864				2	0.2	1
AX-579528698	0.522	1	0.039	0.084	0.248	1	6	0.214	1
AX-579528768		0.213	0.039	0.174	0.248	1	5	0.103	1
AX-579528849				0.084		1	2	0.291	1
AX-579528877		1	0.039			1	3	0.371	1
AX-579528897		0.213	0.039			1	3	0.143	1
AX-579528920		0.217	0.018	0.174	1		4	0.068	1
AX-579528944	0.801			0.039			2	0.139	1
AX-579528994	0.805			0.875	0.248		3	0.746	1
AX-579529001		1	0.039			1	3	0.371	1
AX-579529021	8.20e-05				6.34e-05		2	1.04e-07	0.01
AX-579529036		0.002				0.68	2	0.008	1
AX-579529064				0.084			1	0.084	1
AX-579529123						1	1	1	1
AX-579529134		3.94e-05	2.55e-09	0.637	0.7		4	2.39e-10	2.40e-05
AX-579529184	0.805	1	0.395				3	0.891	1
AX-579529250				0.084			1	0.084	1
AX-579529263	0.324			0.174	1		3	0.451	1
AX-579529358		0.008				1	2	0.045	1
AX-579529370		0.343	0.395				2	0.406	1
AX-579529412		1	0.039				2	0.165	1
AX-579529554		0.213	0.233			1	3	0.422	1
AX-579529813	0.324	0.213	0.233	0.875	1	1	6	0.743	1
AX-579529831						1	1	1	1
AX-579529909	0.287		0.233	0.174	1	1	5	0.54	1
AX-579529946	0.14						1	0.14	1
AX-579529988	0.324			0.174	1	0.695	4	0.593	1
AX-579530015	0.088	0.213	0.039	0.174	0.045	1	6	0.02	1
AX-579530162	1	1	0.039				3	0.371	1
AX-579530168		0.213				1	2	0.542	1
AX-579530176		0.213					1	0.213	1
AX-579530184						1	1	1	1
AX-579530323			0.027				1	0.027	1
AX-579530427	0.029			0.006		0.44	3	0.004	1
AX-579530550			0.068				1	0.068	1
AX-579530567		0.213	0.018			1	3	0.085	1
AX-579530580	0.805	0.213	0.233				3	0.375	1
AX-579530612		0.109					1	0.109	1
AX-579530776	0.287			0.084	0.248		3	0.115	1
AX-579531331						1	1	1	1
AX-579531482	0.517				0.045		2	0.112	1
AX-579531529			0.018				1	0.018	1
AX-579531639		0.213				0.704	2	0.434	1
AX-579531848		0.213	0.039				2	0.048	1
AX-579531850		0.213	0.039			1	3	0.143	1
AX-579531964		0.092					1	0.092	1
AX-579532068	0.287		0.039		0.248	1	4	0.162	1
AX-579532091	0.324				0.248		2	0.283	1
AX-579532126		1	0.039	0.026			3	0.032	1
AX-579532150		0.021	0.395				2	0.047	1
AX-579532292			0.001				1	0.001	1
AX-579532318						1	1	1	1
AX-579532359	2.96e-08	0.02	1	0.084		1	5	7.68e-07	0.074
AX-579532366		0.663	0.092				2	0.231	1
AX-579532393	0.324				6.34e-05		2	2.43e-04	1
AX-579532449						1	1	1	1
AX-579532700		0.213				1	2	0.542	1
AX-579532714	0.805	1				1	3	0.999	1
AX-579532731				0.109			1	0.109	1
AX-579532739	7.59e-06						1	7.59e-06	0.719
AX-579532754		0.213	0.018			1	3	0.085	1
AX-579532968		0.021					1	0.021	1
AX-579532992		0.031	9.01e-05				2	3.82e-05	1
AX-579533031		0.213	0.233				2	0.198	1
AX-579533150						1	1	1	1
AX-579533224		1				1	2	1	1
AX-579533314	1.06e-07				0.414		2	7.91e-07	0.076
AX-579533372		1	0.233			1	3	0.82	1
AX-579533537	0.805						1	0.805	1
AX-579533714						0.628	1	0.628	1
AX-579533734				0.174	0.248	1	3	0.392	1
AX-579533771		0.213	0.039				2	0.048	1
AX-579533798			0.233			1	2	0.573	1
AX-579533891		0.213	0.233				2	0.198	1
AX-579534091	0.02			0.084			2	0.012	1
AX-579534229	0.805	0.213	0.039			1	4	0.264	1
AX-579534295		0.213	0.233			0.695	3	0.346	1
AX-579534297	0.522		0.233		0.248		3	0.321	1
AX-579534393		0.684					1	0.684	1
AX-579534415				0.414	1	0.704	3	0.872	1
AX-579534473	0.287	0.213		0.875	1		4	0.662	1
AX-579534507	5.67e-04	0.031			0.34	0.593	4	0.001	1
AX-579534536		1	0.039			1	3	0.371	1
AX-579534554			0.373				1	0.373	1
AX-579534589	0.324	0.213	0.039	0.084	0.248	1	6	0.075	1
AX-579534590					0.002		1	0.002	1
AX-579534625		0.213				1	2	0.542	1
AX-579534649		1				1	2	1	1
AX-579534665	0.805			0.875	0.248	1	4	0.9	1
AX-579534667	0.827			0.875	0.248		3	0.753	1
AX-579534720	0.805	1		0.084			3	0.494	1
AX-579534760						1	1	1	1
AX-579534905	0.805	0.213		0.084		1	4	0.387	1
AX-579534919						1	1	1	1
AX-579534928	0.324	0.213	0.039		0.248		4	0.067	1
AX-579534937	0.248						1	0.248	1
AX-579534949		1				1	2	1	1
AX-579534972		0.092		0.875	0.248	1	4	0.45	1
AX-579535018			0.087				1	0.087	1
AX-579535035				0.084		1	2	0.291	1
AX-579535050	0.324	0.034		0.875	1		4	0.318	1
AX-579535066	0.805	0.213	0.039				3	0.124	1
AX-579535085	0.805	0.002					2	0.012	1
AX-579535155	3.49e-26	0.031	0.039	0.373			4	7.95e-25	8.06e-20
AX-579535232						1	1	1	1
AX-579535293		0.213	0.395	2.21e-05		1	4	8.98e-04	1
AX-579535351		0.213	0.233			1	3	0.422	1
AX-579535400	0.522		0.039	0.084	0.248	1	5	0.114	1
AX-579535408	0.197						1	0.197	1
AX-579535422	0.055	0.011	0.486			0.593	4	0.028	1
AX-579535543		0.343	0.018			1	3	0.119	1
AX-579535659				0.174	0.045		2	0.046	1
AX-579535722	1.25e-04				0.201		2	2.90e-04	1
AX-579535762		0.22				1	2	0.553	1
AX-579535901	0.287				0.248	1	3	0.508	1
AX-579535917	0.46	0.031	0.039		0.124	1	5	0.038	1
AX-579535925			0.039				1	0.039	1
AX-579535945			0.039				1	0.039	1
AX-579535969		1				1	2	1	1
AX-579535998		1		0.174	0.248	1	4	0.615	1
AX-579536044		1	0.039	0.01	0.248		4	0.018	1
AX-579536071						1	1	1	1
AX-579536107						1	1	1	1
AX-579536120	0.522			0.174	1	1	4	0.779	1
AX-579536264	0.614		0.031	0.084	0.337		4	0.058	1
AX-579536282					0.045	1	2	0.186	1
AX-579536313		1	0.039			1	3	0.371	1
AX-579536342	0.67			0.174	1	1	4	0.829	1
AX-579536438	0.473						1	0.473	1
AX-579536460	0.805	0.213	0.233				3	0.375	1
AX-579536467		0.144	0.109			1	3	0.216	1
AX-579536472		0.213				1	2	0.542	1
AX-579536482			0.233				1	0.233	1
AX-579536513	0.001		0.233	0.174	0.045	1	5	0.004	1
AX-579536577						1	1	1	1
AX-579536633		0.213	0.395				2	0.292	1
AX-579536638	0.004						1	0.004	1
AX-579536643	0.898	0.213	0.233		0.005	1	5	0.078	1
AX-579536648	0.287	0.213	0.233	0.084	0.248		5	0.093	1
AX-579536876		0.213	0.233			1	3	0.422	1
AX-579536955		0.213				1	2	0.542	1
AX-579537018			0.039				1	0.039	1
AX-579537053	0.324	0.213	0.039	0.174	1		5	0.12	1
AX-579537072	0.324			0.875	1		3	0.866	1
AX-579537132	0.46	1		0.174	1		4	0.752	1
AX-579537212			0.035				1	0.035	1
AX-579537278	7.59e-06						1	7.59e-06	0.719
AX-579537284			0.109			1	2	0.35	1
AX-579537307		0.092			0.034	1	3	0.073	1
AX-579537471			0.039			0.593	2	0.11	1
AX-579537566	0.805					1	2	0.98	1
AX-579537567	0.287				0.248	1	3	0.508	1
AX-579537621	0.287	1	0.039	0.174	1	1	6	0.407	1
AX-579537656						1	1	1	1
AX-579537686				0.174	0.248		2	0.179	1
AX-579537690	0.623			0.174	0.248		3	0.3	1
AX-579537756		0.213				1	2	0.542	1
AX-579537763		0.213				1	2	0.542	1
AX-579537828						1	1	1	1
AX-579537931	0.324		0.039	0.174	1	1	5	0.269	1
AX-579537967	0.324				0.248		2	0.283	1
AX-579537985	9.38e-07					0.44	2	6.48e-06	0.615
AX-579538009	0.805	0.213	0.233				3	0.375	1
AX-579538031			0.233	0.084			2	0.096	1
AX-579538108	0.477				4.38e-07	1	3	2.81e-05	1
AX-579538155	0.287			0.006	4.07e-04		3	8.66e-05	1
AX-579538163	0.486	0.213	0.233	2.18e-06		1	5	2.23e-04	1
AX-579538183			0.233				1	0.233	1
AX-579538241						0.648	1	0.648	1
AX-579538257	1	0.46			0.166		3	0.525	1
AX-579538580	0.001			0.174	0.045		3	8.44e-04	1
AX-579538597			0.039	0.084			2	0.022	1
AX-579538809					0.014		1	0.014	1
AX-579539285				4.98e-04			1	4.98e-04	1
AX-579539535		0.213	0.039	0.174	0.248	1	5	0.103	1
AX-579539538					0.008		1	0.008	1
AX-579539554				0.149		1	2	0.432	1
AX-579539635		0.213	0.233			1	3	0.422	1
AX-579539906		0.213		0.174	0.248		3	0.153	1
AX-579539919			0.233			1	2	0.573	1
AX-579540012		0.213				1	2	0.542	1
AX-579540249	0.324	0.213	0.039	0.875	1		5	0.278	1
AX-579540786		0.213	0.039			1	3	0.143	1
AX-579540811			0.395			1	2	0.762	1
AX-579540830			0.233			1	2	0.573	1
AX-579540898	0.081		0.233	2.55e-08	0.217	1	5	1.46e-06	0.14
AX-579540917	5.92e-06						1	5.92e-06	0.562
AX-579540945	0.034		0.233		0.536	1	4	0.207	1
AX-579540988			0.039			1	2	0.165	1
AX-579541026	0.827			0.875	1	1	4	1	1
AX-579541030	0.003		0.039	0.018	0.045	1	5	3.71e-04	1
AX-579541070		0.213				1	2	0.542	1
AX-579541076		0.213		0.084		1	3	0.234	1
AX-579541120			0.164			1	2	0.46	1
AX-579541265		0.213		0.084			2	0.09	1
AX-579541646				0.715			1	0.715	1
AX-579543473		0.349					1	0.349	1
AX-579543493		0.031	0.039				2	0.009	1
AX-579543502	0.805	0.213	0.035	0.505		1	5	0.312	1
AX-579543510	0.324	0.213		0.875	1		4	0.69	1
AX-579543538						1	1	1	1
AX-579543680	0.324			0.875	1		3	0.866	1
AX-579543796	0.324			0.875	1		3	0.866	1
AX-579544283		0.213	0.039			1	3	0.143	1
AX-579544307	3.38e-05			0.084		1	3	2.70e-04	1
AX-579544352		0.011		0.025	0.04	0.593	4	0.002	1
AX-579544559		0.213	0.039			1	3	0.143	1
AX-579544611						1	1	1	1
AX-579544717		1	1				2	1	1
AX-579545124			0.039				1	0.039	1
AX-579545160		0.213					1	0.213	1
AX-579545510					4.38e-07		1	4.38e-07	0.043
AX-579545575				0.165	0.248	1	3	0.381	1
AX-579545778	0.586	0.505	0.027		0.016	0.704	5	0.046	1
AX-579545829						1	1	1	1
AX-579545855					0.05		1	0.05	1
AX-579546128	0.517		0.233	0.875	1	1	5	0.922	1
AX-579546134	9.38e-07	1	0.233			0.564	4	1.00e-04	1
AX-579546152	2.96e-08	1	0.233			1	4	8.98e-06	0.849
AX-579546158	9.45e-05						1	9.45e-05	1
AX-579546189	0.821			2.21e-05		1	3	0.001	1
AX-579546202		0.213					1	0.213	1
AX-579546394		0.213				1	2	0.542	1
AX-579546599		0.213					1	0.213	1
AX-579546660	7.59e-06	1				1	3	6.24e-04	1
AX-579546743		0.213					1	0.213	1
AX-579546810	8.20e-05		0.233	0.084	0.248		4	2.62e-04	1
AX-579546924		1				0.593	2	0.903	1
AX-579547110	1.06e-07						1	1.06e-07	0.01
AX-579547141	0.324	0.213			0.248	1	4	0.42	1
AX-579547241	0.161	0.051		0.001	1	1	5	0.01	1
AX-579547283	0.67			0.084	0.248	1	4	0.382	1
AX-579547297	0.805						1	0.805	1
AX-579547306	0.131				0.002	1	3	0.012	1
AX-579547359						0.4	1	0.4	1
AX-579547370	0.263	0.22			0.248	1	4	0.387	1
AX-579547376	0.324	0.213			0.124	1	4	0.3	1
AX-579547380	0.088					1	2	0.302	1
AX-579547392	0.805	0.213					2	0.473	1
AX-579547419		0.213	0.395			1	3	0.55	1
AX-579547455					0.711		1	0.711	1
AX-579547495						1	1	1	1
AX-579547581		0.109	0.395			1	3	0.391	1
AX-579547627	2.46e-04			0.03	0.441		3	3.00e-04	1
AX-579547869	3.12e-07			0.432	0.7	1	4	8.04e-05	1
AX-579547871	2.00e-05	0.02			0.086		3	5.64e-06	0.536
AX-579547911			0.395			1	2	0.762	1
AX-579547953		0.213				1	2	0.542	1
AX-579547979			0.039	0.432	0.7		3	0.18	1
AX-579547988	0.324			0.875	1	1	4	0.961	1
AX-579547991	0.302	0.109	0.077				3	0.063	1
AX-579548001		0.859					1	0.859	1
AX-579548006	0.623	0.553	0.028	1	1	1	6	0.681	1
AX-579548089	0.287	0.006					2	0.013	1
AX-579548111		0.213					1	0.213	1
AX-579548165		1	0.233			1	3	0.82	1
AX-579548171	0.055	0.021	0.077			1	4	0.017	1
AX-579548183						1	1	1	1
AX-579548194					0.441		1	0.441	1
AX-579548200	0.042				0.239		2	0.056	1
AX-579548233		1	0.233			0.695	3	0.725	1
AX-579548240	0.805	1	0.233	0.875	0.248	1	6	0.895	1
AX-579548288		0.213	0.233			1	3	0.422	1
AX-579548497	0.709	0.213				1	3	0.706	1
AX-579548566	0.287	0.349		0.084	0.248	0.44	5	0.173	1
AX-579548596						1	1	1	1
AX-579548657	0.805					1	2	0.98	1
AX-579548719			9.11e-04	0.132			2	0.001	1
AX-579548949		0.213	0.233			1	3	0.422	1
AX-579549195	0.623					1	2	0.918	1
AX-579549247	2.85e-05						1	2.85e-05	1
AX-579549258	0.085		0.233				2	0.097	1
AX-579549565				1	0.7		2	0.95	1
AX-579549580	0.085	0.593	0.233	1.33e-05	0.02	1	6	9.77e-05	1
AX-579550486						1	1	1	1
AX-579550552	0.67	0.213		0.174	0.441	1	5	0.529	1
AX-579550597	0.049	0.217		0.084			3	0.029	1
AX-579550624	1			0.587	0.7	1	4	0.987	1
AX-579550648	0.666		0.07	0.174	0.7	1	5	0.411	1
AX-579550708	0.593		0.61			1	3	0.916	1
AX-579550880		0.109					1	0.109	1
AX-579551306	9.41e-06			0.084	0.124	1	4	8.27e-05	1
AX-579551308			0.126				1	0.126	1
AX-579551647			0.039			1	2	0.165	1
AX-579551679		1	0.039			1	3	0.371	1
AX-579551746						1	1	1	1
AX-579551816					4.38e-07		1	4.38e-07	0.043
AX-579551898	0.67			0.174	0.441		3	0.43	1
AX-579551937			0.037			0.648	2	0.113	1
AX-579551994						1	1	1	1
AX-579552008	0.001			2.55e-08			2	6.98e-10	6.97e-05
AX-579552027	7.07e-07	0.593	0.768	0.011	0.505		5	1.56e-05	1
AX-579552048		0.213	0.395			1	3	0.55	1
AX-579552079		1				1	2	1	1
AX-579552226	0.623		0.395	0.637		1	4	0.883	1
AX-579552313			0.233			1	2	0.573	1
AX-579552422		1					1	1	1
AX-579552423	0.83				0.536		2	0.805	1
AX-579552427	0.324		0.233	0.174	1	1	5	0.564	1
AX-579552486	8.20e-05				0.248	0.44	3	7.18e-04	1
AX-579552670		1	0.233			1	3	0.82	1
AX-579552680		1	0.395			1	3	0.932	1
AX-579552696	0.088			0.07	4.07e-04	1	4	0.001	1
AX-579552703	0.522		0.233		0.248	1	4	0.537	1
AX-579552806	0.287	0.213	0.039	0.084	0.248	1	6	0.07	1
AX-579552819		0.144	0.233			1	3	0.341	1
AX-579552832		0.123	0.864			1	3	0.612	1
AX-579552854		0.537	0.864		0.843	1	4	0.985	1
AX-579552860	0.287	0.114			0.248		3	0.141	1
AX-579552943	0.522	1	0.039		0.248		4	0.227	1
AX-579552977		0.758				1	2	0.968	1
AX-579552989	0.709						1	0.709	1
AX-579553103						1	1	1	1
AX-579553157		0.213					1	0.213	1
AX-579553234			0.061			0.098	2	0.037	1
AX-579553326				0.027	0.414	0.593	3	0.122	1
AX-579553563	9.38e-07	0.213	0.233	0.018	0.248		5	2.63e-06	0.252
AX-579553572			0.233				1	0.233	1
AX-579553615	1.25e-04		0.164		7.74e-09		3	7.35e-11	7.37e-06
AX-579553637	8.20e-05		0.233		0.248	1	4	0.002	1
[truncated: 99,377 more rows]
